# Supplementary material for: Polymer-lipid hybrid nanoparticles incorporating green coffee extract: enhancing treatment for hepatic steatosis and fibrosis through metabolomic insights
Source: Royal Society of Chemistry journal article supplement (doi:10.1039/d5ra06552f), 2025-01-01
Supplement: d5ra06552f2.xlsx [file d5ra06552f2.xlsx]

## Sheet: Sheet1
Table S1. List of all identified metabolites in samples
Index	Q1 (Da)	Q3 (Da)	Molecular weight (Da)	Formula	Ionization model	Compounds	Class I	Class II	CAS	Level	GCE1	GCE2	GCE3	QC01	QC02	QC03	cpd_ID
Zbqn002049	236.09	164.07	237.1	C12H15NO4	[M-H]-	(2-carboxyethyl)-L-phenylalanine	Amino acids and derivatives	Amino acids and derivatives	-	1	316437	340400	313370	361557	353924	386271	-
Zmmp002946	295.13	120.08	294.122	C14H18N2O5	[M+H]+	(3-(carboxyamino)-2-methylpropanoyl)phenylalanine	Amino acids and derivatives	Amino acids and derivatives	-	1	1.85283e+07	2.01953e+07	1.95184e+07	1.82108e+07	1.91099e+07	1.91816e+07	-
Zbqn001288	202.11	130.09	203.116	C9H17NO4	[M-H]-	(3-hydroxypropanoyl)-L-leucine	Amino acids and derivatives	Amino acids and derivatives	-	1	506587	623606	539280	520130	549122	565338	-
Wacyp01167	229.15	142.09	228.147	C11H20N2O3	[M+H]+	(6-amino-3-oxohexan-2-yl)proline	Amino acids and derivatives	Amino acids and derivatives	-	1	2.00222e+06	1.42992e+06	2.51882e+06	679674	1.94602e+06	1.23077e+06	-
Lmcn009122	253.217	235.209	254.225	C16H30O2	[M-H]-	(7Z)-Hexadecenoic acid	Lipids	Free fatty acids	2416-19-5	3	109438	115069	107797	101091	93403.2	100634	-
Waptn06702	295.23	171.1	296.235	C18H32O3	[M-H]-	(9S)-Hydroxyoctadecadienoic acid	Lipids	Free fatty acids	73543-67-6	1	2.58184e+07	2.62282e+07	2.65284e+07	2.67508e+07	2.56127e+07	2.68373e+07	-
Lmbn006152	279.233	59.0133	280.24	C18H32O2	[M-H]-	(9Z,11E)-Octadecadienoic acid	Lipids	Free fatty acids	2540-56-9	3	287131	289700	287091	252126	258011	259431	C04056
Lchp000218	209.08	121.06	208.074	C11H12O4	[M+H]+	(R)-3-ethyl-7-hydroxy-6-methoxyphthalide	Others	Lactones	-	3	228122	262310	257180	266287	234512	165429	-
Lchp000221	207.06	91.05	206.058	C11H10O4	[M+H]+	(Z)-3-Ethylidene-7-hydroxy-6-methoxyphthalide	Others	Lactones	-	3	175765	128522	125509	164246	177130	143520	-
Lskp211283	233.15	84.05	232.142	C10H20N2O4	[M+H]+	1',2',3',4'-tetrahydro-5'-deoxypinnatanine	Alkaloids	Alkaloids	-	3	295626	212635	323670	253341	264684	311945	-
Waln002782	371.1	193.05	372.106	C16H20O10	[M-H]-	1'-Galactoyl Ferulic acid	Phenolic acids	Phenolic acids	-	2	248571	235793	241768	254336	228999	226487	-
Lmnn002886	477.14	179.03	478.147	C23H26O11	[M-H]-	1'-O-(3,4-Dihydroxyphenethyl)-O-caffeoyl-glucoside	Phenolic acids	Phenolic acids	-	3	14430.3	30869.4	31294.5	30900	36643.8	24365.4	-
Waln002419	341.09	163.04	342.095	C15H18O9	[M-H]-	1'-O-Galactoyl p-Coumaric acid*	Phenolic acids	Phenolic acids	-	2	169664	163344	151202	156683	140833	160651	-
MWSslk133	257.18	195.18	258.183	C14H26O4	[M-H]-	1,14-Tetradecanedioic Acid	Lipids	Free fatty acids	821-38-5	2	148092	155423	145143	153772	156246	155218	-
MWSHC2025	217.1	144.08	216.09	C12H12N2O2	[M+H]+	1,2,3,4-Tetrahydro-3-carboxy-2-carboline	Alkaloids	Alkaloids	72002-54-1	3	719246	803493	793625	836698	796156	873110	-
pmn001534	787.1	617.08	788.107	C34H28O22	[M-H]-	1,2,3,6-Tetra-O-galloyl-β-D-glucose	Phenolic acids	Phenolic acids	79886-50-3	3	20995	10436.8	12229	19351.3	20148.1	20823.9	C04516
MA10079134	255.03	227.04	256.037	C14H8O5	[M-H]-	1,2,4-Trihydroxyanthraquinone	Quinones	Anthraquinone	81-54-9	3	153702	122565	139183	141057	165877	87655.3	C10395
MWStz050	356.15	338.14	355.142	C20H21NO5	[M+H]+	1,2-Methylenedioxy-3,10,11-trimethoxynoraporphine	Alkaloids	Aporphine alkaloids	14050-90-9	3	181705	323790	259517	271349	225300	171414	-
Wamxn01040	297.12	59.01	238.105	C9H18O7	[M+CH3COO]-	1,2-Propanediol 1-O-B-D-Glucopyranoside	Others	Alcohol compounds	-	1	93840.3	106147	118427	114745	100882	122311	-
Lcfn121077	239.08	59.01	240.084	C8H16O8	[M-H]-	1,3,4,5,6,7,8-heptahydroxyoctan-2-one*	Others	Saccharides	-	1	305480	343695	281594	311897	288636	346052	-
Zbjn005476	677.15	353.09	678.159	C34H30O15	[M-H]-	1,3,4-Tri-O-Caffeoyl Quinic Acid	Phenolic acids	Phenolic acids	-	3	1.05334e+07	1.1796e+07	1.10457e+07	1.06159e+07	1.16334e+07	1.15446e+07	-
mws0939	211.083	126.066	210.075	C8H10N4O3	[M+H]+	1,3,7-Trimethyluric acid	Organic acids	Organic acids	5415-44-1	3	81381.9	77500.4	94195.9	144819	116323	91454.5	C16361
Zmjp011129	473.36	455.35	472.355	C30H48O4	[M+H]+	1,3-Dihydroxyurs-12-en-28-oic acid (Kaneric acid)	Terpenoids	Triterpene	107693-87-8	3	303677	365503	307513	327041	341635	309457	-
Hmbn005951	383.12	163.04	384.121	C21H20O7	[M-H]-	1,3-O-Di-p-Coumaroylglycerol	Phenolic acids	Phenolic acids	-	3	33255.2	29605.3	26883.6	22320.8	21174.6	23324.9	-
MWSmce346	517.13	163.04	516.127	C25H24O12	[M+H]+	1,3-O-Dicaffeoylquinic Acid (Cynarin)	Phenolic acids	Phenolic acids	30964-13-7	1	2.2332e+06	2.89691e+06	2.42874e+06	2.88326e+06	3.37081e+06	2.9023e+06	C10445
Wbjp002330	221.09	175.09	220.085	C11H12N2O3	[M+H]+	1,3-dihydroxy-2,3,3a,4-tetrahydropyrrolo[2,1-b]quinazolin-9(1H)-one	Alkaloids	Alkaloids	-	2	2.04197e+06	2.32711e+06	1.99384e+06	2.33361e+06	2.2858e+06	2.10749e+06	-
Lmqn003856	337.092	175.044	338.1	C16H18O8	[M-H]-	1,4,8-Trihydroxynaphthalene-1-O-glucoside	Quinones	Naphthol	39015-63-9	3	112013	124101	130648	111071	148844	114553	-
Lasp003143	193.09	105.07	192.078	C11H12O3	[M+H]+	1,4-Benzodioxin-6-propanol	Lignans and Coumarins	Lignans	-	3	3.46337e+06	3.44399e+06	3.43274e+06	3.44611e+06	3.45948e+06	3.57095e+06	-
mws0943	151.05	71.01	152.059	C7H8N2O2	[M-H]-	1,4-Dihydro-1-Methyl-4-oxo-3-pyridinecarboxamide	Alkaloids	Pyridine alkaloids	769-49-3	3	25037	38464	31652.5	30951.8	31759.6	33294.8	C05843
Zbjn003605	677.17	515.14	678.18	C31H34O17	[M-H]-	1,4-O-di-Caffeoyl-3-O-glucoside Quinic Acid*	Phenolic acids	Phenolic acids	-	3	1.02211e+07	1.06069e+07	1.0972e+07	8.01734e+06	1.13732e+07	1.1056e+07	-
pme2529	163.06	101.02	164.069	C6H12O5	[M-H]-	1,5-Anhydro-D-glucitol	Others	Saccharides	154-58-5	3	35907.7	52961.4	55033.7	52774.3	48051.9	43320.2	C07326
Waptp00696	163.06	69.03	162.053	C6H10O5	[M+H]+	1,5-Anhydrofructose	Others	Saccharides	75414-43-6	3	62003.9	92257.7	99710.6	74477.6	84061.2	97182.4	C06485
Waxn004217	677.18	515.14	678.18	C31H34O17	[M-H]-	1,5-O-dicaffeoyl-3-O-glucoside-quinic acid*	Phenolic acids	Phenolic acids	-	3	332112	361201	430707	325443	361693	336070	-
mws0663	181.07	124.05	180.065	C7H8N4O2	[M+H]+	1,7-Dimethylxanthine	Nucleotides and derivatives	Nucleotides and derivatives	611-59-6	2	680006	695183	699464	699579	663550	682311	C13747
Lcfp121157	340.26	322.25	339.252	C18H33N3O3	[M+H]+	1,8,15-triazacyclohenicosane-2,9,16-trione	Others	Others	56403-08-8	3	4.99938e+06	5.35991e+06	5.15955e+06	5.21934e+06	5.09123e+06	5.18289e+06	-
Walbn08060	504.31	279.24	505.317	C25H48NO7P	[M-H]-	1-(((2-(dimethylamino)ethoxy)(hydroxy)phosphoryl)oxy)-3-hydroxypropan-2-yl (9Z,12Z)-octadeca-9,12-dienoate*	Lipids	LPE	-	2	1.83533e+07	2.08748e+07	1.93325e+07	2.14616e+07	1.8398e+07	2.30068e+07	-
Waln010743	578.35	279.23	579.354	C28H54NO9P	[M-H]-	1-(2,3-dihydroxypropoxy)-3-(((2-(dimethylamino)ethoxy)(hydroxy)phosphoryl)oxy)propan-2-yl (11Z,14Z)-octadeca-11,14-dienoate	Lipids	LPE	-	2	7.08279e+06	7.60528e+06	5.39808e+06	8.62671e+06	7.82012e+06	7.69363e+06	-
Waln011704	580.36	281.25	581.369	C28H56NO9P	[M-H]-	1-(2,3-dihydroxypropoxy)-3-(((2-(dimethylamino)ethoxy)(hydroxy)phosphoryl)oxy)propan-2-yl (Z)-14-Octadecenoic Acid	Lipids	LPE	-	2	282674	350425	327856	335685	345051	323288	-
Waln011524	554.35	255.23	555.354	C26H54NO9P	[M-H]-	1-(2,3-dihydroxypropoxy)-3-(((2-(dimethylamino)ethoxy)(hydroxy)phosphoryl)oxy)propan-2-yl palmitate	Lipids	LPE	-	1	2.09572e+06	3.72883e+06	3.34324e+06	2.99419e+06	3.64959e+06	2.42186e+06	-
Zbzp010481	335.26	335.26	334.251	C21H34O3	[M+H]+	1-(3,5-Dihydroxyphenyl)pentadecan-1-one	Quinones	Quinones	-	2	1.35701e+06	1.93561e+06	1.76062e+06	2.04098e+06	1.44052e+06	1.28968e+06	-
Zbfn002690	299.08	93.03	300.084	C13H16O8	[M-H]-	1-(4-Hydroxybenzoyl)Glucose; 25545-07-7	Phenolic acids	Phenolic acids	-	1	612862	642020	606623	600197	599883	650424	-
pmn001681	165.09	149.06	166.099	C10H14O2	[M-H]-	1-(4-Methoxyphenyl)-1-propanol	Others	Alcohol compounds	5349-60-0	3	105984	130543	88899.8	159806	149457	152791	-
Zmsp000758	158.12	70.07	158.117	C8H15NO2	[M+H]+	1-(Hydroxymethyl)hexahydro-1h-pyrrolizin-2-ol	Alkaloids	Pyrrole alkaloids	-	3	2.00307e+06	2.17858e+06	2.16061e+06	1.83712e+06	2.1735e+06	2.06744e+06	-
Lmqn000432	333.06	333.06	334.067	C9H19O11P	[M-H]-	1-(sn-Glycero-3-phospho)-1D-myo-inositol	Others	Saccharides	-	2	5.98505e+06	5.58577e+06	4.47202e+06	5.03856e+06	5.50752e+06	5.95674e+06	-
Hmcp003783	211.09	193.07	210.079	C13H10N2O	[M+H]+	1-Acetyl-β-carboline	Alkaloids	Plumerane	-	3	333032	315562	285402	352417	311644	311581	-
MWS00330g	116.071	70.0662	115.063	C5H9NO2	[M+H]+	1-Amino-1-cyclobutane-carboxylic-acid*	Amino acids and derivatives	Amino acids and derivatives	22264-50-2	3	7.77219e+06	7.70399e+06	7.68119e+06	8.12105e+06	7.74615e+06	7.98287e+06	-
MWSmce295	245.07	113.03	244.07	C9H12N2O6	[M+H]+	1-Arabinosyluracil	Nucleotides and derivatives	Nucleotides and derivatives	3083-77-0	3	283047	270560	299329	346446	274680	256573	-
mws0748	353.09	191.06	354.095	C16H18O9	[M-H]-	1-Caffeoylquinic acid	Phenolic acids	Phenolic acids	1241-87-8	1	1.20298e+06	1.3736e+06	1.26294e+06	1.26034e+06	1.33236e+06	1.35109e+06	-
Yalp012524	607.29	547.27	606.283	C35H42O9	[M+H]+	1-Deacetylnimbolinin A	Terpenoids	Triterpene	-	3	41244.9	20764.7	74822	42181.3	42967.1	46965.9	-
pmf0174	157.16	157.16	158.167	C10H22O	[M-H]-	1-Decanol*	Others	Alcohol compounds	112-30-1	3	1.46945e+07	1.59591e+07	8.6076e+06	1.04129e+07	1.05241e+07	1.05825e+07	C01633
pmf0297	297.32	183.21	298.324	C20H42O	[M-H]-	1-Eicosanol	Lipids	Free fatty acids	629-96-9	3	4.1629e+06	4.15987e+06	3.68536e+06	4.00683e+06	4.3648e+06	3.61896e+06	-
MWStz123	116.14	57.07	115.136	C7H17N	[M+H]+	1-Heptylamine	Alkaloids	Alkaloids	111-68-2	3	32506.7	39167.6	27312.4	27361.7	27311.7	19627.3	-
Lacp005908	255.065	181.065	254.057	C15H10O4	[M+H]+	1-Hydroxy-3-Methoxy-9,10-Anthraquinone	Quinones	Anthraquinone	20733-99-7	3	60399.5	48768.3	42267.8	48091.2	50777.8	75481.8	-
MWS1872	225.05	105.03	224.047	C14H8O3	[M+H]+	1-Hydroxyanthraquinone	Quinones	Anthraquinone	129-43-1	3	811458	717886	627408	753610	732761	687994	C02980
pmn001375	535.18	373.13	536.189	C26H32O12	[M-H]-	1-Hydroxypinoresinol-1-O-Glucoside	Lignans and Coumarins	Lignans	81495-71-8	3	1.72099e+06	2.41986e+06	1.88732e+06	2.21945e+06	2.03211e+06	1.89357e+06	-
MWSslk225	133.06	77.04	132.058	C9H8O	[M+H]+	1-Indanone	Others	Ketone compounds	83-33-0	3	141303	183056	137798	119267	172573	118922	C01504
Waqkp06484	353.27	261.22	352.261	C21H36O4	[M+H]+	1-Linolenoylglycerol	Lipids	Glycerol ester	-	1	216525	220828	259074	218034	272232	224261	-
Waln014377	447.25	279.233	448.258	C22H41O7P	[M-H]-	1-Linoleoyl-2-Lysophosphatidic Acid Monomethyl Ester	Lipids	Glycerol ester	-	3	175576	209700	137921	154087	115109	189460	-
Lmhp112042	355.28	263.24	354.277	C21H38O4	[M+H]+	1-Linoleoylglycerol*	Lipids	Glycerol ester	2277-28-3	1	277417	296247	349951	356224	318322	313534	-
Lmhp009384	679.39	263.24	678.383	C33H58O14	[M+H]+	1-Linoleoylglycerol-2,3-di-O-glucoside*	Lipids	Glycerol ester	-	1	36937.1	70813.4	55562.9	79002	39571.8	66432.3	-
MWStz025	192.065	146.061	191.058	C10H9NO3	[M+H]+	1-Methoxyindole-3-Carboxylic Acid*	Alkaloids	Plumerane	91913-76-7	3	407725	371890	335754	364334	400999	301333	-
MWSHC2028	231.11	158.1	230.106	C13H14N2O2	[M+H]+	1-Methyl-1,2,3,4-tetrahydro-β-carboline-3-carboxylic acid	Alkaloids	Plumerane	40678-46-4	1	2.07452e+07	2.41058e+07	2.23051e+07	2.36301e+07	2.59571e+07	2.43958e+07	-
MWS0687	153.07	108.04	152.059	C7H8N2O2	[M+H]+	1-Methyl-6-Oxo-1,6-Dihydropyridine-3-Carboxamide	Alkaloids	Pyridine alkaloids	701-44-0	3	136607	148692	133834	107665	112957	137742	C05842
mws0847	150.08	133.05	149.07	C6H7N5	[M+H]+	1-Methyladenine	Nucleotides and derivatives	Nucleotides and derivatives	5142-22-3	1	4.69952e+06	5.38846e+06	5.05474e+06	4.63405e+06	5.15738e+06	5.03108e+06	C02216
Rfmb320	144.102	84.0813	143.095	C7H13NO2	[M+H]+	1-Methylpiperidine-2-carboxylic acid	Organic acids	Organic acids	7730-87-2	3	1.25721e+06	925042	1.09152e+06	943962	814671	848921	-
pme0166	167.06	110.03	166.049	C6H6N4O2	[M+H]+	1-Methylxanthine	Nucleotides and derivatives	Nucleotides and derivatives	6136-37-4	3	79798.7	98047.2	77914.2	89009.4	85451.4	70640.3	C16358
MWSmce549	303.25	57.07	302.246	C17H34O4	[M+H]+	1-Monomyristin	Lipids	Glycerol ester	589-68-4	2	67542.4	61396.3	70535	54079.1	44675	62846.1	-
Zbjn003801	691.18	353.09	692.195	C32H36O17	[M-H]-	1-O-(6'-O-feruloyl)glucoside-3-O-Caffeoyl Quinic Acid	Phenolic acids	Phenolic acids	-	3	119563	132349	121206	120198	103490	76554.7	-
WaYp005219	309.1	147.04	308.09	C15H16O7	[M+H]+	1-O-(p-coumaroyl) 3-Hydroxy-3-methylglutaric acid	Phenolic acids	Phenolic acids	-	2	1.92156e+06	2.21652e+06	2.0397e+06	2.13908e+06	2.11279e+06	2.24837e+06	-
Lmsn002288	503.14	341.09	504.148	C21H28O14	[M-H]-	1-O-Caffeoyl-(6-O-glucosyl)-β-D-glucose	Phenolic acids	Phenolic acids	-	2	226539	256922	262379	312871	265967	262294	-
Lmsn002887	311.08	163.04	312.084	C14H16O8	[M-H]-	1-O-Caffeoyl-β-D-xylose	Phenolic acids	Phenolic acids	-	3	129102	139151	134128	116638	147098	128957	-
Wafp002310	309.14	163.04	308.137	C15H20N2O5	[M+H]+	1-O-Caffeoyllysine	Alkaloids	Phenolamine	-	3	3.40333e+06	4.12807e+06	3.93147e+06	3.90576e+06	3.96569e+06	3.81895e+06	-
Lmsn004674	309.1	147.05	310.105	C15H18O7	[M-H]-	1-O-Cinnamoyl-β-D-glucose	Phenolic acids	Phenolic acids	40004-96-4	3	370915	413112	329801	332146	396334	338931	-
pmb3062	385.11	151.1	386.121	C17H22O10	[M-H]-	1-O-Eudesmoylquinic acid	Phenolic acids	Phenolic acids	-	2	6.09815e+06	7.4152e+06	7.14096e+06	6.01972e+06	6.72456e+06	5.66806e+06	-
Wdtp003420	357.12	177.05	356.111	C16H20O9	[M+H]+	1-O-Feruloyl-β-D-glucose	Phenolic acids	Phenolic acids	7196-71-6	1	709437	869059	996830	680165	1.02678e+06	786836	C17759
Wafp002988	323.16	177.06	322.153	C16H22N2O5	[M+H]+	1-O-Feruloyllysine	Alkaloids	Phenolamine	-	1	8.43048e+06	9.31911e+06	8.68837e+06	8.69534e+06	8.87073e+06	8.63209e+06	-
Lmsn004323	507.11	169.01	508.122	C23H24O13	[M-H]-	1-O-Galloyl-2-O-Feruloyl-β-D-glucose	Phenolic acids	Phenolic acids	-	3	29057.7	29060.9	28809.1	25688	40949.4	39233.5	-
pmb2871	315.072	153.019	316.079	C13H16O9	[M-H]-	1-O-Gentisoyl-β-D-glucoside*	Phenolic acids	Phenolic acids	23445-11-6	1	2.00116e+06	2.46488e+06	2.21482e+06	1.6885e+06	2.20952e+06	1.34641e+06	-
Zmhn001926	299.08	137.02	300.084	C13H16O8	[M-H]-	1-O-Salicyloyl-β-D-glucose*	Phenolic acids	Phenolic acids	60517-74-0	1	1.81649e+06	2.04761e+06	1.93425e+06	1.8828e+06	1.89359e+06	1.87985e+06	-
HJN003	385.11	223.06	386.121	C17H22O10	[M-H]-	1-O-Sinapoyl-β-D-glucose	Phenolic acids	Phenolic acids	-	2	570731	616617	733305	738660	656591	649871	C01175
Lmtn002565	329.11	167.03	330.095	C14H18O9	[M-H]-	1-O-Vanilloyl-D-Glucose	Phenolic acids	Phenolic acids	-	2	62625.2	85117.9	62808.5	73375.4	62107.7	66655.3	C20470
Waln003742	341.09	195.05	342.095	C15H18O9	[M-H]-	1-O-p-Coumaroyl Galactonic Acid	Phenolic acids	Phenolic acids	-	3	859210	974768	893257	875454	866979	921718	-
pmn001419	325.09	163.04	326.1	C15H18O8	[M-H]-	1-O-p-Coumaroyl-β-D-glucose*	Phenolic acids	Phenolic acids	7139-64-2	1	5.31737e+06	6.30141e+06	6.03067e+06	5.44142e+06	5.44222e+06	5.65269e+06	C16827
Wafp002664	293.16	147.04	292.142	C15H20N2O4	[M+H]+	1-O-p-Coumaroyllysine	Alkaloids	Phenolamine	-	3	2.95889e+06	3.47246e+06	3.4231e+06	3.45647e+06	3.19365e+06	3.36705e+06	-
pmb3068	337.09	163.04	338.1	C16H18O8	[M-H]-	1-O-p-Coumaroylquinic acid*	Phenolic acids	Phenolic acids	-	1	4.42499e+06	4.24705e+06	4.27501e+06	3.19534e+06	4.31593e+06	5.01969e+06	-
Walp003918	357.12	147.04	356.111	C16H20O9	[M+H]+	1-O-p-Coumaroylsedoheptulose	Phenolic acids	Phenolic acids	-	3	300445	370442	383617	366715	323143	294530	-
pmn001320	237.08	163.04	238.084	C12H14O5	[M-H]-	1-O-p-Cumaroylglycerol	Phenolic acids	Phenolic acids	106055-11-2	3	11726	17748	15674.7	17358.9	11829	17010.1	-
Cmbp005948	401.12	163.04	400.116	C21H20O8	[M+H]+	1-O-p-Hydroxycinnamoyl-3-O-caffeoylglycerol	Phenolic acids	Phenolic acids	-	3	934251	933781	898967	987576	1.01293e+06	1.04596e+06	-
Zbjn005212	661.18	353.09	662.186	C31H34O16	[M-H]-	1-O-rhamnose-3,4-Di-O-Caffeoyl Quinic Acid	Phenolic acids	Phenolic acids	-	3	1.29828e+07	1.47086e+07	1.39798e+07	1.56657e+07	1.39139e+07	1.38239e+07	-
pmf0293	269.29	209.23	270.292	C18H38O	[M-H]-	1-Octadecanol	Lipids	Free fatty acids	112-92-5	3	50536.3	50425.2	71359.2	60889.5	58862.4	60617.3	-
pmb0296	357.3	265.25	356.293	C21H40O4	[M+H]+	1-Oleoyl-Sn-Glycerol	Lipids	Glycerol ester	129784-87-8	3	33640.6	47532.8	49261.3	26087.3	33422.7	30759.3	-
Walp012598	329.269	237.221	328.261	C19H36O4	[M+H]+	1-Palmitoleoyl-Glycerol*	Lipids	Glycerol ester	-	3	62291.5	56852.3	53825.5	58550.3	66208.3	67259.3	-
Wagn011658	653.38	397.14	654.383	C31H58O14	[M-H]-	1-Palmitoyl-Sn-Glycerol 3-O-Diglucoside	Lipids	Glycerol ester	-	2	42344.3	42970.2	25327.1	30106.3	36748.7	32973.6	-
pmb1562	351.25	147.12	350.246	C21H34O4	[M+H]+	1-Stearidonoyl-Glycerol	Lipids	Glycerol ester	-	1	957528	1.01879e+06	872470	977102	1.02355e+06	1.34755e+06	-
Yamp002343	208.1	120.08	207.089	C11H13NO3	[M+H]+	1-[2-(Furan-2-yl)-2-oxoethyl]piperidin-2-one	Alkaloids	Alkaloids	-	3	191720	279932	241019	265280	304238	275651	-
Lcsp011354	340.283	62.0611	339.277	C20H37NO3	[M+H]+	1-amino-2,11-dihydroxyicosa-12,14-dien-3-one	Lipids	LPE	-	3	32413.8	24970	25807.1	22497.6	33654.1	21127.6	-
Lmhp011562	353.27	261.22	352.261	C21H36O4	[M+H]+	1-α-Linolenoyl-glycerol*	Lipids	Glycerol ester	-	1	1.78037e+07	1.8443e+07	1.70435e+07	1.78545e+07	1.84496e+07	1.77941e+07	-
Wcdp007388	275.2	133.1	274.193	C18H26O2	[M+H]+	10,14,16-Octadecatrien-12-Ynoic Acid	Lipids	Free fatty acids	-	2	365521	431149	364857	397147	336705	383764	-
pmn001686	287.22	241.22	288.23	C16H32O4	[M-H]-	10,16-Dihydroxypalmitic acid	Lipids	Free fatty acids	3233-90-7	1	47500.1	51202.7	46843	39724.1	40964.9	46251.5	C08285
Hmbp002333	387.13	147.04	386.121	C17H22O10	[M+H]+	10-Dehydrogeniposide	Terpenoids	Monoterpenoids	-	3	84220.2	115756	105734	110479	135778	125316	-
pmb1912	474.17	327.12	473.166	C20H23N7O7	[M+H]+	10-Formyltetrahydrofolic Acid	Alkaloids	Alkaloids	2800-34-2	1	3.23137e+06	3.42346e+06	3.21203e+06	3.51362e+06	3.40261e+06	3.17363e+06	C00234
Waln013216	299.26	141.13	300.266	C18H36O3	[M-H]-	10-Hydroxystearic Acid	Lipids	Free fatty acids	638-26-6	3	443988	440814	437205	432280	439429	441599	-
Zmdp009373	345.2	313.18	344.199	C21H28O4	[M+H]+	10α-hydroxy-10-oxo-Δ8-tetrahydrocannabinol	Others	Others	-	3	36227.9	30393.5	44840.6	34260.6	38914.2	31148.7	-
Qmyp101403	293.21	107.08	292.204	C18H28O3	[M+H]+	11,12-O-Isopropyfidenesolajiangxin F	Terpenoids	Sesquiterpenoids	-	3	305076	331861	352468	403796	339993	460604	-
MW0140149	325.27	81.07	324.266	C20H36O3	[M+H]+	11-HEDE	Lipids	Free fatty acids	5598-37-8	3	64233.6	66225.5	86010.8	73780.8	53640.2	56142.1	-
zjmp120216	471.34	435.33	470.34	C30H46O4	[M+H]+	11-Hydroxy-3-oxours-12-en-28-oic acid	Terpenoids	Triterpene	-	3	372845	466172	437396	385719	408758	435395	-
mws2623	281.25	281.25	282.256	C18H34O2	[M-H]-	11-Octadecanoic acid(Vaccenic acid)*	Lipids	Free fatty acids	506-17-2	2	2.45513e+06	2.69953e+06	2.57514e+06	2.65519e+06	2.59998e+06	2.51588e+06	C21944
Zbzp003763	177.05	134.04	176.047	C10H8O3	[M+H]+	11-methoxy viburtinal	Terpenoids	Monoterpenoids	-	3	1.05446e+06	1.1251e+06	1.04108e+06	1.07353e+06	1.0624e+06	1.09788e+06	-
Qmxp101525	303.23	257.22	302.225	C20H30O2	[M+H]+	11β-Hydroxy-8,15-isopimaradiene-4-one	Terpenoids	Ditepenoids	-	2	105499	164025	163621	123172	168905	137534	-
MW0015479	311.22	293.21	310.214	C18H30O4	[M+H]+	12(13)Ep-9-KODE	Lipids	Free fatty acids	-	3	940156	893874	945440	829718	688389	853119	-
Hmlp006939	445.3	427.28	444.288	C27H40O5	[M+H]+	12(13→14)Abeospirost-5,13(18)-diene-1,3,15-triol (Dracaenogenin A)	Steroids	Steroidal saponins	-	3	70605.2	34513.2	81471.2	66958.6	84413.6	56551.3	-
Lmbn005487	313.24	251.24	314.246	C18H34O4	[M-H]-	12,13-DHOME; (9Z)-12,13-Dihydroxyoctadec-9-enoic acid	Lipids	Free fatty acids	263399-35-5	1	749377	704566	699344	750258	741165	751471	C14829
pmb2799	295.23	195.14	296.235	C18H32O3	[M-H]-	12,13-Epoxy-9-Octadecenoic Acid	Lipids	Free fatty acids	6799-85-5	2	2.69344e+07	2.75694e+07	2.62115e+07	2.61732e+07	2.68937e+07	2.62339e+07	C14826
Hmqp005412	319.22	319.22	318.219	C20H30O3	[M+H]+	12-Hydroxyabietic Acid	Terpenoids	Ditepenoids	3484-61-5	3	2.18127e+06	2.17599e+06	2.0858e+06	2.01579e+06	2.15155e+06	1.71886e+06	-
Hmqp006656	335.26	335.26	334.251	C21H34O3	[M+H]+	12-Hydroxyhydromethylabietate	Terpenoids	Ditepenoids	-	3	734742	710188	734261	708792	822153	625966	-
Lcsn002223	387.16	59.01	388.173	C18H28O9	[M-H]-	12-Hydroxyjasmonic Acid Glucoside	Organic acids	Organic acids	124649-25-8	1	46701.2	54755.8	52029.5	59759.6	43548.7	55303.9	-
Lmbn009444	297.24	183.14	298.251	C18H34O3	[M-H]-	12-Hydroxyoctadec-9-Enoic Acid; Ricinoleic acid	Lipids	Free fatty acids	141-22-0	2	5.21311e+06	5.69493e+06	4.35079e+06	5.35673e+06	4.60472e+06	4.63638e+06	C08365
MWS5235	299.26	253.25	300.266	C18H36O3	[M-H]-	12-Hydroxyoctadecanoic acid	Lipids	Free fatty acids	106-14-9	3	567486	580587	534714	556739	562835	576305	-
mws0955	317.212	113.098	318.219	C20H30O3	[M-H]-	12-Oxo-5,8,10,14-eicosatetraenoic acid*	Lipids	Free fatty acids	108437-64-5	3	30506.7	26003.2	21171	25380.1	27108.2	22877	C14807
Zmyn004548	291.2	235.17	292.204	C18H28O3	[M-H]-	12-Oxo-phytodienoic acid	Lipids	Free fatty acids	85551-10-6	2	71043.5	69021.3	63207.5	62466.4	70109	62813	C01226
Wasyqn4246	307.09	96.96	308.093	C12H20O7S	[M-H]-	12-Sulfooxy-9,10-Dihydrojasmonic Acid	Organic acids	Organic acids	-	2	2.04624e+06	2.52361e+06	1.83097e+06	2.28923e+06	2.35558e+06	2.34157e+06	-
Lmbn005369	295.23	195.14	296.235	C18H32O3	[M-H]-	13(S)-HODE;13(S)-Hydroxyoctadeca-9Z,11E-dienoic acid*	Lipids	Free fatty acids	10219-69-9	1	3.61066e+07	3.74621e+07	3.75982e+07	3.77427e+07	3.69748e+07	3.64946e+07	C14762
Waptp08627	336.33	69.07	335.319	C22H41NO	[M+H]+	13,16-Docosadienamide	Lipids	Free fatty acids	-	2	188254	198974	141088	130850	164955	179195	-
Walbn06565	242.18	225.15	243.183	C13H25NO3	[M-H]-	13-Amino-13-oxotridecanoic acid	Lipids	Free fatty acids	-	1	1.35833e+06	1.21458e+06	1.22359e+06	1.42436e+06	1.46248e+06	1.48727e+06	-
MWS80007	311.22	249.22	312.23	C18H32O4	[M-H]-	13-Hydroperoxy-9Z,11E-octadecadienoic acid*	Lipids	Free fatty acids	23017-93-8	2	903388	990403	928521	983358	994272	953361	-
Hmqp006221	311.26	279.32	310.251	C19H34O3	[M+H]+	13-Hydroxy-9Z,11E-octadecadienoic acid	Lipids	Free fatty acids	18104-45-5	2	106826	115629	102993	108598	110995	128214	-
Lmbn005443	293.21	235.17	294.219	C18H30O3	[M-H]-	13-KODE; (9Z,11E)-13-Oxooctadeca-9,11-dienoic acid*	Lipids	Free fatty acids	54739-30-9	2	6.15475e+06	6.38068e+06	6.28144e+06	6.24005e+06	6.12643e+06	6.1376e+06	C14765
MWS2430	241.22	241.21	242.225	C15H30O2	[M-H]-	13-methylmyristic acid	Lipids	Free fatty acids	2485-71-4	2	203100	220781	179163	182239	155088	171577	-
pmb2789	309.21	209.05	310.214	C18H30O4	[M-H]-	13S-Hydroperoxy-6Z,9Z,11E-octadecatrienoic acid	Lipids	Free fatty acids	121107-97-9	3	237746	212880	204517	202602	220295	228026	-
pmb2804	311.22	171.14	312.23	C18H32O4	[M-H]-	13S-Hydroperoxy-9Z,11E-octadecadienoic acid	Lipids	Free fatty acids	33964-75-9	3	1.18841e+06	1.34199e+06	1.2222e+06	1.34005e+06	1.31838e+06	1.32853e+06	C04717
Zmpn003368	293.21	195.14	294.219	C18H30O3	[M-H]-	13S-Hydroxy-9Z,11E,15Z-octadecatrienoic acid	Lipids	Free fatty acids	87984-82-5	1	782725	814826	778273	848442	813549	811607	C16316
pma0461	277.216	93.0699	276.209	C18H28O2	[M+H]+	14,15-Dehydrocrepenynic acid	Lipids	Free fatty acids	4154-44-3	3	5.54489e+06	5.23367e+06	5.3891e+06	5.47333e+06	5.35996e+06	5.57434e+06	-
MW0012360	337.24	255.24	338.246	C20H34O4	[M-H]-	14,15-DiHETrE	Lipids	Free fatty acids	77667-09-5	3	107211	248692	173436	130310	178330	168966	C14775
Walp007738	288.25	88.08	287.246	C16H33NO3	[M+H]+	14-Amino-15-hydroxy-11-methylpentadecanoic acid	Lipids	Sphingolipids	-	1	174332	168139	169649	159723	147526	173014	-
Lskp211331	299.2	197.13	298.193	C20H26O2	[M+H]+	14-Didehydrovouacapane-5a-ol	Terpenoids	Ditepenoids	-	3	5.4945e+06	5.35465e+06	5.36252e+06	5.27754e+06	5.48688e+06	5.4346e+06	-
Hmqp005455	297.243	81.07	296.235	C18H32O3	[M+H]+	15(R)-Hydroxylinoleic Acid*	Lipids	Free fatty acids	177931-23-6	1	2.32532e+07	2.53309e+07	2.57939e+07	2.4815e+07	2.46521e+07	2.57993e+07	-
MW0140176	319.23	255.21	318.219	C20H30O3	[M+H]+	15-HEPE	Lipids	Free fatty acids	88852-33-9	3	355868	310341	330219	369322	372519	313448	-
Qmjp080408	351.25	259.2	350.246	C21H34O4	[M+H]+	15-Hydroxysessilifol F	Terpenoids	Sesquiterpenoids	-	3	1.87388e+06	2.14525e+06	2.17605e+06	2.15896e+06	2.09976e+06	2.0263e+06	-
mws0945	317.21	113.1	318.219	C20H30O3	[M-H]-	15-Oxo-5Z,8Z,11Z,13E-eicosatetraenoic acid*	Lipids	Free fatty acids	81416-72-0	3	22866.8	27115.5	24585.1	25461.7	21120	25157.5	C04577
MWSprf135	365.34	283.26	366.35	C24H46O2	[M-H]-	15-Tetracosenoic acid	Lipids	Free fatty acids	506-37-6	3	208550	219467	293643	396038	245184	265532	C08323
Zmyn005026	283.26	283.26	284.272	C18H36O2	[M-H]-	16-Methylheptadecanoic acid	Lipids	Free fatty acids	2724-58-5	3	337985	331457	235609	268693	268845	279760	C20356
Zmyn004676	293.21	113.1	294.219	C18H30O3	[M-H]-	17-Hydroxylinolenic acid	Lipids	Free fatty acids	-	3	3.29962e+06	3.42988e+06	3.28281e+06	3.40769e+06	3.32694e+06	3.37119e+06	C16346
MW0168453	281.25	69.07	280.24	C18H32O2	[M+H]+	17-Octadecynoic acid	Lipids	Free fatty acids	-	3	197759	191733	263485	201470	222996	206289	-
Qmgp102514	533.214	371.163	532.206	C26H32N2O10	[M+H]+	18,19-Hydroxyvincosamide	Alkaloids	Plumerane	-	3	283327	247983	278285	195447	257845	194697	-
Qmyp101229	237.18	109.1	236.178	C15H24O2	[M+H]+	1β-Hydroxy-α-cyperone	Terpenoids	Sesquiterpenoids	-	3	240220	194220	208872	201169	214236	205087	-
Zmjp005407	597.17	477.12	596.153	C30H28O13	[M+H]+	2''-O-(3'',4''-Dimethoxybenzoyl)vitexin	Flavonoids	Flavones	-	3	676718	637817	735083	639314	680455	700602	-
Lmqn006260	301.04	151	302.043	C15H10O7	[M-H]-	2',3',4',5,7-pentahydroxyflavone*	Flavonoids	Flavones	-	3	12192.2	9856.35	12559.3	13701.5	11493.7	16623.9	-
MWSmce490	167.04	123.05	168.042	C8H8O4	[M-H]-	2',4',6'-Trihydroxyacetophenone	Others	Ketone compounds	480-66-0	3	11319.5	11008.5	12833.4	12728.2	10726.5	7120.79	C21895
MWSmce698	149.095	65.038	148.089	C10H12O	[M+H]+	2',4'-Dimethylacetophenone	Others	Ketone compounds	89-74-7	3	6.8323e+06	3.68059e+06	3.30068e+06	4.20581e+06	4.65155e+06	4.45814e+06	-
pmp000714	510.16	137.02	492.127	C23H24O12	[M+NH4]+	2'-(2,3-Dihydroxybenzoyl)gentiopicroside	Terpenoids	Monoterpenoids	-	3	128024	122339	139098	172945	192542	116941	-
pme3961	252.11	136.06	251.102	C10H13N5O3	[M+H]+	2'-Deoxyadenosine*	Nucleotides and derivatives	Nucleotides and derivatives	958-09-8	3	4.86199e+06	6.12178e+06	5.3944e+06	5.86473e+06	5.59261e+06	6.19696e+06	C00559
pme3184	332.08	136.06	331.068	C10H14N5O6P	[M+H]+	2'-Deoxyadenosine-5'-monophosphate	Nucleotides and derivatives	Nucleotides and derivatives	653-63-4	3	490077	473736	557960	367019	512729	443260	C00360
pme1194	228.1	112.05	227.091	C9H13N3O4	[M+H]+	2'-Deoxycytidine	Nucleotides and derivatives	Nucleotides and derivatives	951-77-9	3	47913.3	62007.4	61625.8	63288.7	77047.1	57019.4	C00881
pme1184	268.1	152.06	267.097	C10H13N5O4	[M+H]+	2'-Deoxyguanosine	Nucleotides and derivatives	Nucleotides and derivatives	961-07-9	1	633935	710327	691815	661092	663518	911290	C00330
pmc0066	333.06	137.05	332.052	C10H13N4O7P	[M+H]+	2'-Deoxyinosine-5'-monophosphate	Nucleotides and derivatives	Nucleotides and derivatives	3393-18-8	3	2.2554e+06	2.91046e+06	2.20687e+06	2.84063e+06	2.72714e+06	2.66402e+06	C06196
pme3882	227.07	184.06	228.075	C9H12N2O5	[M-H]-	2'-Deoxyuridine	Nucleotides and derivatives	Nucleotides and derivatives	951-78-0	3	19346.8	17960	17484.3	16163	18818.2	17012.2	C00526
Zbbn004585	551.18	175.04	552.184	C26H32O13	[M-H]-	2'-Feruloyl-Mussaenosidic Acid	Terpenoids	Monoterpenoids	-	3	29828.8	45056.4	21754.4	29937.7	31156.9	32542.7	-
MWSslk126	255.101	121.028	254.094	C16H14O3	[M+H]+	2'-Hydroxy-2-methoxychalcone	Flavonoids	Chalcones	42220-77-9	3	36161.7	32045.4	30163.2	33259.4	30727.8	34117.4	-
pmp000449	677.255	515.203	676.248	C32H40N2O14	[M+H]+	2'-O-Glucosyl-11-hydroxy vincoside lactam	Alkaloids	Plumerane	-	3	178959	213646	182653	158982	211867	261533	-
Hmhp001812	282.12	136.06	281.112	C11H15N5O4	[M+H]+	2'-O-Methyladenosine	Nucleotides and derivatives	Nucleotides and derivatives	2140-79-6	3	1.10387e+06	1.38432e+06	1.16093e+06	1.46365e+06	1.41757e+06	1.50755e+06	-
Qmgp102508	677.255	515.206	676.248	C32H40N2O14	[M+H]+	2'-O-β-D-glucopyranosyl-11-hydroxyvincoside lactam	Alkaloids	Plumerane	-	3	1.16474e+06	1.17882e+06	1.19554e+06	1.30718e+06	1.43622e+06	1.23058e+06	-
Lhyp111013	135.04	89.04	134.037	C8H6O2	[M+H]+	2(4H)-benzofuranone	Others	Others	-	1	1.08743e+06	1.06943e+06	1.1474e+06	890965	1.01134e+06	1.04905e+06	-
Lmsn011830	485.33	485.33	486.334	C30H46O5	[M-H]-	2,19-Dihydroxy-3-oxours-12-en-28-oic acid	Terpenoids	Triterpene	176983-21-4	3	5.92814e+06	7.23238e+06	6.93339e+06	5.74845e+06	6.4232e+06	7.01462e+06	-
Lcsn006884	213.11	169.12	214.12	C11H18O4	[M-H]-	2,2'-(3-methylcyclohexane-1,1-diyl)diacetic acid	Organic acids	Organic acids	5345-12-0	3	23274.9	6709.6	13598	11030.5	16198.9	11324.6	-
MWSslk118	227.067	136.039	226.059	C9H10N2O5	[M+H]+	2,2'-Cyclouridine	Alkaloids	Alkaloids	3736-77-4	3	22724.2	19928.2	40978	15591.7	35499	39215.8	-
Wmzn000227	145.06	109.04	146.058	C6H10O4	[M-H]-	2,2-Dimethylsuccinic acid	Organic acids	Organic acids	597-43-3	3	8779.94	3887.19	9399.03	7006.31	7629.52	5959.69	-
Zahp011689	205.09	149.02	204.079	C12H12O3	[M+H]+	2,2-dimethylchromene-6-carboxylic acid	Others	Others	34818-56-9	2	49653.6	48582.5	53788.4	56691.9	61422	67628.8	-
Lskp211453	505.35	469.32	504.345	C30H48O6	[M+H]+	2,3,19,23-Tetrahydroxyurs-12-en-28-oic acid	Terpenoids	Triterpene	-	3	2.44312e+06	3.12838e+06	2.56688e+06	2.81003e+06	2.62537e+06	2.49559e+06	-
Cmcp006498	651.4	453.34	650.403	C36H58O10	[M+H]+	2,3,19-Trihydroxyolean-12-en-28-oic acid-28-O-glucoside	Terpenoids	Triterpene Saponin	-	3	133673	137370	137042	158899	172466	124580	-
Lskp211468	649.39	451.32	648.387	C36H56O10	[M+H]+	2,3,23-Trihydroxyolean-12,18(19)-dien-28-oic acid-glucoside	Terpenoids	Triterpene Saponin	-	3	61432.6	76197	86194.8	85369	76534.6	89599.2	-
Smpn009230	487.34	487.34	488.35	C30H48O5	[M-H]-	2,3,23-Trihydroxyolean-12-en-28-oic acid*	Terpenoids	Triterpene	-	3	162405	120528	142488	132681	95860.4	101995	-
Wbmn009702	487.34	487.34	488.35	C30H48O5	[M-H]-	2,3,23-Trihydroxyurs-12-en-28-oic acid*	Terpenoids	Triterpene	-	3	104635	123952	113013	97741.1	123179	118242	C08617
Ymjm000143	447.15	163.04	446.142	C19H26O12	[M+H]+	2,3,4-Trihydroxybutyl 6-O-(E)-caffeoyl-β-D-glucopyranoside	Phenolic acids	Phenolic acids	-	3	624584	379434	546368	522121	491717	520995	-
MWSmce465	123.09	82.06	122.084	C7H10N2	[M+H]+	2,3,5-Trimethylpyrazine	Alkaloids	Alkaloids	14667-55-1	3	627726	603199	544380	543655	749308	575111	-
Waptn01665	443.18	251.11	384.163	C15H28O11	[M+CH3COO]-	2,3-Butanediol apiosylglucoside	Others	Alcohol compounds	-	1	988864	1.03007e+06	984293	993818	1.08007e+06	915635	-
MW0168384	105.07	51.02	104.059	C3H8N2O2	[M+H]+	2,3-Diaminopropionic acid	Amino acids and derivatives	Amino acids and derivatives	4033-39-0	3	522964	563359	514504	520286	483899	579912	C06393
mws0639	153.019	109.029	154.027	C7H6O4	[M-H]-	2,3-Dihydroxybenzoic Acid*	Phenolic acids	Phenolic acids	303-38-8	3	1.60527e+06	1.73819e+06	1.8785e+06	1.5585e+06	1.68322e+06	1.63695e+06	C00196
Lmzn106284	471.348	471.348	472.355	C30H48O4	[M-H]-	2,3-Dihydroxylup-20(29)-en-28-oic acid (Alphitolic acid)*	Terpenoids	Triterpene	19533-92-7	2	1.46156e+06	1.74927e+06	1.46621e+06	1.59687e+06	1.68892e+06	1.62289e+06	C16912
pmn001706	471.35	471.35	472.355	C30H48O4	[M-H]-	2,3-Dihydroxyolean-12-en-28-oic acid (2-Hydroxyoleanolic acid)*	Terpenoids	Triterpene	26707-60-8	2	1.44981e+06	1.83646e+06	1.63166e+06	1.6765e+06	1.67767e+06	1.67862e+06	-
Hmjn008136	469.33	469.33	470.34	C30H46O4	[M-H]-	2,3-Dihydroxyoleana-11,13(18)-dien-28-oic acid (Camaldulenic acid)	Terpenoids	Triterpene	71850-15-2	3	1.26696e+07	1.16013e+07	1.14962e+07	1.08932e+07	1.09188e+07	1.11883e+07	-
Zmpn008194	471.35	471.35	472.355	C30H48O4	[M-H]-	2,3-Dihydroxyurs-12-en-28-oic acid (Corosolic acid)*	Terpenoids	Triterpene	4547-24-4	2	1.25792e+06	1.62534e+06	1.30526e+06	1.344e+06	1.51672e+06	1.43745e+06	-
mws1610	471.348	471.348	472.355	C30H48O4	[M-H]-	2,3-Dihydroxyurs-12-en-29-oic acid (Maslinic acid)*	Terpenoids	Triterpene	4373-41-5	2	1.56023e+06	1.8494e+06	1.59128e+06	1.72968e+06	1.68336e+06	1.71546e+06	C16939
Walbn06605	357.06	121.03	358.069	C18H14O8	[M-H]-	2,3-bis(2-carboxyphenyl)succinic acid	Phenolic acids	Phenolic acids	-	1	1.1837e+06	940299	1.17309e+06	950060	915610	969291	-
MWStz054	152.11	91.06	151.1	C9H13NO	[M+H]+	2,4,6,6-Tetramethyl-3(6H)-pyridinone	Alkaloids	Pyridine alkaloids	203524-64-5	3	23500.5	31900.9	39278.2	33512.1	44370.1	37420.9	-
Lmbn013410	205.16	189.13	206.167	C14H22O	[M-H]-	2,4-Di-Tert-Butylphenol	Others	Others	96-76-4	1	1.71662e+06	1.66248e+06	1.82729e+06	1.60891e+06	1.60291e+06	1.60314e+06	-
NK10246260	162.06	116.05	161.048	C9H7NO2	[M+H]+	2,4-Dihydroxyquinoline	Alkaloids	Quinoline alkaloids	86-95-3	1	1.05215e+06	1.14609e+06	1.17464e+06	1.10701e+06	1.09738e+06	1.15547e+06	C16716
MA10002917	183	109.02	184.012	C6H4N2O5	[M-H]-	2,4-Dinitrophenol	Others	Others	51-28-5	3	8666.71	12989.5	9560.54	6984.82	8878.41	11715.7	C02496
Wacyp08016	228.2	95.09	210.162	C13H22O2	[M+NH4]+	2,5,8-trimethyldeca-2,4,7-triene-1,10-diol	Terpenoids	Monoterpenoids	-	3	1.08382e+06	946334	1.07015e+06	1.46324e+06	1.38177e+06	1.41216e+06	-
Wcdn001824	315.07	153.02	316.079	C13H16O9	[M-H]-	2,5-Dihydroxybenzoic acid-5-O-glucoside	Phenolic acids	Phenolic acids	-	1	445759	490197	494434	440914	468562	470422	-
mws0180	153.02	109.03	154.027	C7H6O4	[M-H]-	2,5-Dihydroxybenzoic acid; Gentisic Acid*	Phenolic acids	Phenolic acids	490-79-9	3	591861	683399	694002	612940	621867	641757	C00628
Wmhp000055	169.05	65.04	168.042	C8H8O4	[M+H]+	2,5-Dimethoxybenzoquinone*	Quinones	Quinones	3117-03-1	1	1.00973e+06	978371	1.00131e+06	1.20637e+06	1.07018e+06	1.01705e+06	-
Latp003285	353.12	191.07	352.115	C17H20O8	[M+H]+	2,5-Dimethyl-7-hydroxychromone glucoside	Others	Chromone	-	2	1.7836e+06	2.55782e+06	2.23428e+06	2.02748e+06	2.00064e+06	2.00689e+06	-
Wacyp09192	415.21	119.09	414.204	C24H30O6	[M+H]+	2,5-O-Di-CinnamylSorbitol	Phenolic acids	Phenolic acids	-	1	1.69239e+07	2.14834e+07	1.17937e+07	3.18769e+07	3.09406e+07	3.19706e+07	-
MWS20169	269.05	254.02	270.053	C15H10O5	[M-H]-	2,5-dihydroxy-1-methoxy-anthraquinone	Quinones	Anthraquinone	-	3	21686.2	24093.6	24002.9	26484	19939.8	19771.7	-
Lmdp003110	289.071	243.065	288.063	C15H12O6	[M+H]+	2,6,7,4'-Tetrahydroxyisoflavanone	Flavonoids	Isoflavones	-	3	296841	273385	177630	289011	247156	254716	C16233
MWS2035	221.15	57.07	220.146	C14H20O2	[M+H]+	2,6-Di-Tert-Butyl-1,4-Benzoquinone	Quinones	Quinones	719-22-2	3	37792.5	35927.3	37499	36634.7	33211.6	44486	-
Walbn07906	235.17	217.16	236.178	C15H24O2	[M-H]-	2,6-Di-tert-butyl-4-hydroxymethylphenol	Others	Others	88-26-6	2	301271	348324	316743	309481	315137	315931	-
Lmln010063	205.158	189.129	206.167	C14H22O	[M-H]-	2,6-Di-tert-butylphenol	Phenolic acids	Phenolic acids	128-39-2	3	1.74372e+06	1.63612e+06	1.82184e+06	1.58414e+06	1.58703e+06	1.55587e+06	-
Zmsp001834	169.05	65	168.042	C8H8O4	[M+H]+	2,6-Dimethoxy-1,4-benzoquinone*	Quinones	Quinones	530-55-2	1	902523	1.08876e+06	1.03552e+06	1.09474e+06	1.18159e+06	1.11352e+06	C10331
Zmxn110201	331.1	108.02	332.111	C14H20O9	[M-H]-	2,6-Dimethoxy-4-hydroxyphenol-1-O-ß-D-glucopyranoside	Others	Others	-	1	81607.4	130079	110195	117277	101653	90663.6	-
Lmbn005172	165.06	119.05	166.063	C9H10O3	[M-H]-	2,6-Dimethoxybenzaldehyde	Others	Aldehyde compounds	3392-97-0	1	124643	147449	111865	141586	154939	134050	-
pmf0348	187.13	97.06	188.141	C10H20O3	[M-H]-	2,6-Dimethyl-7-octene-2,3,6-triol	Terpenoids	Monoterpenoids	73815-21-1	3	348668	373309	350941	377760	323969	336981	-
Zbqp001937	203.14	130.05	202.132	C9H18N2O3	[M+H]+	2,6-diamino-7-methyl-5-oxooctanoic acid	Amino acids and derivatives	Amino acids and derivatives	-	1	1.82012e+06	1.87543e+06	1.80148e+06	1.73263e+06	1.98286e+06	1.96679e+06	-
Yshj000011	333.12	171.06	332.111	C14H20O9	[M+H]+	2,6-dimethoxy-4-hydroxyphenyl-1-O-beta-D-glucopyranoside	Others	Others	-	3	899941	1.03671e+06	996813	901615	931496	1.02316e+06	-
Ladn008168	263.11	248.08	264.115	C18H16O2	[M-H]-	2,7-Dihydroxy-1,6-dimethylpyrene	Others	Others	-	3	105418	111290	101453	104635	108561	109764	-
WaYn010475	552.33	253.22	553.338	C26H52NO9P	[M-H]-	2-(2,3-dihydroxypropoxy)-3-(((2-(dimethylamino)ethoxy)(hydroxy)phosphoryl)oxy)propan-2-yl (E)-hexadec-9-enoate	Lipids	LPE	-	1	104298	143352	145190	141433	150453	157650	-
WaYn011395	580.36	281.25	581.369	C28H56NO9P	[M-H]-	2-(2,3-dihydroxypropoxy)-3-(((2-(dimethylamino)ethoxy)(hydroxy)phosphoryl)oxy)propan-2-yl (Z)-14-Octadecenoic Acid	Lipids	LPE	-	1	647921	599175	542312	938734	715826	808992	-
Waln011009	578.34	279.23	579.354	C28H54NO9P	[M-H]-	2-(2,3-dihydroxypropoxy)-3-(((2-(dimethylamino)ethoxy)(hydroxy)phosphoryl)oxy)propyl (11Z,14Z)-octadeca-11,14-dienoate	Lipids	LPE	-	1	6.71961e+06	6.47958e+06	7.10624e+06	7.29188e+06	7.44853e+06	6.09132e+06	-
Waln010192	576.33	277.22	577.338	C28H52NO9P	[M-H]-	2-(2,3-dihydroxypropoxy)-3-(((2-(dimethylamino)ethoxy)(hydroxy)phosphoryl)oxy)propyl (8E,11Z,14Z)-octadeca-8,11,14-trienoate	Lipids	LPE	-	1	55355.3	97267.1	78203.5	66949	85177.9	73076.6	-
Wasyqp2134	206.04	160.04	205.037	C10H7NO4	[M+H]+	2-(2-hydroxy-1H-indol-3-yl)-2-oxoacetic acid	Alkaloids	Plumerane	14370-71-9	1	264500	410613	325088	318784	362049	320648	-
Zbfn005212	609.18	193.05	610.19	C28H34O15	[M-H]-	2-(3,4-dihydroxyphenylmethyl)-6-feruloyl-O-glucosyl-D-xylose	Phenolic acids	Phenolic acids	-	3	327640	461318	490371	397601	351861	380033	-
Jmwn002057	477.16	315.11	478.169	C20H30O13	[M-H]-	2-(3-β-D-glucopyranosyloxy-4-hydroxyphenyl)ethanol-1-O-β-D-glucopyranoside	Others	Alcohol compounds	-	3	91312	98069.4	99770	82854.3	85144.1	97437.3	-
MWStz152	206.08	118.07	205.074	C11H11NO3	[M+H]+	2-(Acetylamino)-3-phenyl-2-propenoic acid*	Alkaloids	Alkaloids	5469-45-4	2	1.47848e+06	1.38795e+06	1.28756e+06	785230	1.50891e+06	1.37832e+06	-
pme3967	312.13	180.09	311.123	C12H17N5O5	[M+H]+	2-(Dimethylamino)guanosine*	Nucleotides and derivatives	Nucleotides and derivatives	2140-67-2	2	9.50596e+06	1.04955e+07	9.91205e+06	1.04614e+07	1.00285e+07	1.00869e+07	-
pme3083	164.04	120.05	165.043	C8H7NO3	[M-H]-	2-(Formylamino)benzoic acid	Phenolic acids	Phenolic acids	3342-77-6	3	208286	255857	208910	191512	221430	221017	C05653
Zbfn006396	591.17	193.05	592.179	C28H32O14	[M-H]-	2-(Phenethoxy)-6-feruloyl-O-glucosyl-D-Xylono-1,5-Lactone	Phenolic acids	Phenolic acids	-	3	35012.5	41531	34642.5	52979.3	45214	50345.8	-
Lcfn121182	259.12	155.11	260.126	C12H20O6	[M-H]-	2-(acetyloxy)-5-ethyl-2,3-dimethylhexanedioicacid	Organic acids	Organic acids	-	3	2.35868e+06	2.7068e+06	2.31766e+06	2.66214e+06	2.72296e+06	2.73825e+06	-
mws0236	124.01	79.96	125.015	C2H7NO3S	[M-H]-	2-Aminoethanesulfonic acid	Organic acids	Organic acids	107-35-7	3	16469.7	19544.4	11446.1	15448.3	16173.8	20258.8	C00245
Walp007214	290.27	88.08	289.262	C16H35NO3	[M+H]+	2-Aminohexadecane-1,5,6-triol	Lipids	Sphingolipids	-	1	771740	760642	780264	695474	735655	719509	-
pme3017	104.07	58.07	103.063	C4H9NO2	[M+H]+	2-Aminoisobutyric acid	Organic acids	Organic acids	62-57-7	3	3.03919e+06	3.36434e+06	3.2622e+06	2.87861e+06	3.47376e+06	3.43032e+06	C03665
Walp008102	302.31	88.08	301.298	C18H39NO2	[M+H]+	2-Aminooctadecane-1,4-diol	Lipids	Sphingolipids	-	1	42117.4	41082.2	46918.7	37028.9	42407.3	45856.2	-
MWS2076	110.06	65.04	109.053	C6H7NO	[M+H]+	2-Aminophenol	Alkaloids	Alkaloids	95-55-6	3	105832	129429	121473	138757	150071	109135	C01987
pmb0374	136.06	119.04	135.054	C5H5N5	[M+H]+	2-Aminopurine	Nucleotides and derivatives	Nucleotides and derivatives	452-06-2	1	6.76212e+06	7.37075e+06	7.218e+06	6.99955e+06	6.94793e+06	7.00128e+06	-
mws5028	136.04	80.06	135.032	C7H5NO2	[M+H]+	2-Benzoxazolinone	Alkaloids	Alkaloids	59-49-4	3	264882	303937	285510	224282	249759	253158	-
HJN106	485.33	467.32	486.334	C30H46O5	[M-H]-	2-Carboxy-3-hydroxy-A(1)-norlupan-20(29)-en-28-oic acid (Ceanothic acid)	Terpenoids	Triterpene	21302-79-4	2	32936.8	31315.9	42800.1	42401.3	38134.4	46840	-
pmf0175	157.16	157.16	158.167	C10H22O	[M-H]-	2-Decanol*	Others	Alcohol compounds	1120-06-5	3	3.75255e+07	4.02532e+07	2.21302e+07	2.72038e+07	2.70054e+07	2.83089e+07	-
Zmyn000230	147.029	57.0344	148.037	C5H8O5	[M-H]-	2-Dehydro-3-deoxy-L-arabinonate	Others	Saccharides	-	3	82854.1	90288.3	101825	100749	112816	103024	C00684
pmb2507	213.02	96.97	214.024	C5H11O7P	[M-H]-	2-Deoxyribose-1-phosphate	Nucleotides and derivatives	Nucleotides and derivatives	17210-42-3	3	15281.8	17467.4		17412.2	21388	17785.8	C00672
Zmjn003398	227.13	183.14	228.136	C12H20O4	[M-H]-	2-Dodecenedioic acid	Lipids	Free fatty acids	6402-36-4	1	286710	356207	314445	311458	321111	320462	C16308
Zmyn014236	309.17	96.96	310.181	C14H30O5S	[M-H]-	2-Dodecoxyethyl Hydrogen Sulfate	Others	Others	48073-44-5	1	23041.6	13510.5	21957.9	14488.1	14031.7	19223.5	-
pmp000087	269.1	177.05	268.095	C13H16O6	[M+H]+	2-Feruloyl-sn-glycerol	Phenolic acids	Phenolic acids	-	3	63026.7	33228.6	21970.6	70197.9	89072.9	43771.7	-
Lmbn001288	131.03	87.04	132.042	C5H8O4	[M-H]-	2-Hydroxy-2-methyl-3-oxobutanoic acid*	Organic acids	Organic acids	71698-08-3	1	56959.1	56881.3	57230.4	62211.5	55428.3	65079.5	C06010
Lmrn001951	181.05	135.04	182.058	C9H10O4	[M-H]-	2-Hydroxy-3-(4-Hydroxyphenyl)Propanoic Acid*	Phenolic acids	Phenolic acids	23508-35-2	3	104048	103535	135507	121150	98080.1	136662	-
Lmrn003000	165.06	103.06	166.063	C9H10O3	[M-H]-	2-Hydroxy-3-phenylpropanoic acid	Phenolic acids	Phenolic acids	7326-19-4	1	111642	119040	118844	100168	114094	107193	C05607
Lmrn002746	131.07	85.07	132.079	C6H12O3	[M-H]-	2-Hydroxy-4-methylpentanoic acid	Organic acids	Organic acids	498-36-2	1	329164	328216	348276	324131	292272	318871	-
Lmmn001643	163.04	119.05	164.047	C9H8O3	[M-H]-	2-Hydroxycinnamic acid*	Phenolic acids	Phenolic acids	583-17-5	3	826811	677543	1.07468e+06	757179	729175	666826	C01772
Zmgn000216	125	78.96	126.008	C2H7O4P	[M-H]-	2-Hydroxyethylphosphonic acid	Organic acids	Organic acids	22987-21-9	3	63707.6	71547.8	77402.6	86543.9	84624.3	57500.3	C06451
Zmyn000247	147.03	57.03	148.037	C5H8O5	[M-H]-	2-Hydroxyglutaric Acid*	Organic acids	Organic acids	13095-48-2	1	201424	164370	197469	179971	187518	216703	C03196
Lmmn003323	271.23	225.22	272.235	C16H32O3	[M-H]-	2-Hydroxyhexadecanoic acid*	Lipids	Free fatty acids	764-67-0	1	2.68528e+07	2.3024e+07	2.91076e+07	2.73346e+07	2.6799e+07	2.67736e+07	-
mws0341	131.07	85.07	132.079	C6H12O3	[M-H]-	2-Hydroxyisocaproic acid	Organic acids	Organic acids	20312-37-2	1	2.68253e+06	3.04711e+06	3.0218e+06	2.90241e+06	3.03327e+06	2.98174e+06	C03264
Zmyn002323	151.04	107.05	152.047	C8H8O3	[M-H]-	2-Hydroxyphenylacetic acid	Phenolic acids	Phenolic acids	614-75-5	3	39374.7	65924.9	51465.5	50303.1	63853	77844.2	C05852
pmf0290	94.03	66.03	95.0371	C5H5NO	[M-H]-	2-Hydroxypyridine	Alkaloids	Pyridine alkaloids	142-08-5	3	33310.3	34640.2	31514.8	28224.6	41949.6	20434	C02502
pmb3101	175.06	115.04	176.069	C7H12O5	[M-H]-	2-Isopropylmalic Acid	Organic acids	Organic acids	49601-06-1	3	272615	350801	309469	313518	307863	313633	C02504
Lmhp012042	355.28	263.24	354.277	C21H38O4	[M+H]+	2-Linoleoylglycerol*	Lipids	Glycerol ester	3443-82-1	1	135731	164768	138300	166388	140148	129282	-
Lmhp009190	679.39	263.24	678.383	C33H58O14	[M+H]+	2-Linoleoylglycerol-1,3-di-O-glucoside*	Lipids	Glycerol ester	-	1	45449.7	69235.9	36851.5	41465.3	37178.3	47920.7	-
Wagp002530	177.06	117.03	176.047	C10H8O3	[M+H]+	2-Methoxy-1-benzofuran-5-carbaldehyde	Others	Aldehyde compounds	-	2	7.27548e+06	6.6841e+06	6.35011e+06	7.4311e+06	6.6676e+06	8.03961e+06	-
Lmxp001668	151.08	91.05	150.068	C9H10O2	[M+H]+	2-Methoxy-4-ethenylphenol	Others	Others	7786-61-0	2	124619	167320	158086	181871	161028	144970	C17883
NK10252689	168.03	123.01	169.037	C7H7NO4	[M-H]-	2-Methoxy-5-nitrophenol	Others	Others	636-93-1	3	13929.2	15050.4	12059.9	12235.2	13164.3	11710.2	C17385
Zbzp007301	293.21	55.05	292.204	C18H28O3	[M+H]+	2-Methoxy-6-undecyl-1,4-benzoquinone	Quinones	Quinones	-	2	56669	66543.5	57403.2	63373.4	42692.6	60496.5	-
Lmgn002091	173.05	93.03	174.053	C7H10O5	[M-H]-	2-Methyl-3-oxoadipic acid*	Organic acids	Organic acids	-	1	7.3012e+06	1.26727e+07	9.52983e+06	7.9073e+06	8.33088e+06	1.15939e+07	C18307
MWS1936	172.072	128.046	171.064	C6H9N3O3	[M+H]+	2-Methyl-5-nitroimidazole-1-ethanol	Alkaloids	Alkaloids	443-48-1	3	104138	133890	105460	126986	115318	100720	C07203
Lmhn004446	229.11	185.12	230.115	C11H18O5	[M-H]-	2-Methylene-3-(6-hydroxyhexyl)-butanedioic acid	Organic acids	Organic acids	-	3	54620.7	47547.9	54046	55484.9	47803.9	48778	-
mws0924	145.05	101.06	146.058	C6H10O4	[M-H]-	2-Methylglutaric acid*	Organic acids	Organic acids	617-62-9	3	75373.3	99101.7	78463.5	84278.5	76318.3	105825	-
mws0473	131.035	87.0452	132.042	C5H8O4	[M-H]-	2-Methylsuccinic acid*	Organic acids	Organic acids	498-21-5	1	616051	715415	653952	684904	737391	664858	-
Hmln000873	331.07	169.01	332.074	C13H16O10	[M-H]-	2-O-Galloyl-D-glucose	Phenolic acids	Phenolic acids	-	2	144935	109190	114543	171318	133252	165531	-
Wacn003131	353.05	127	354.059	C15H14O10	[M-H]-	2-O-P-Coumaroylhydroxycitric Acid	Phenolic acids	Phenolic acids	-	3	2.20238e+06	2.49586e+06	2.13444e+06	2.09892e+06	2.38247e+06	2.59689e+06	-
HJN093	451.09	313.05	452.096	C20H20O12	[M-H]-	2-O-Salicyl-6-O-Galloyl-D-Glucose	Phenolic acids	Phenolic acids	-	3	104839	98319.9	112098	106915	101123	98431.7	-
Zbfn004397	505.14	323.08	506.142	C24H26O12	[M-H]-	2-O-caffeoyl-5-O-(3-hydroxy-4-phenoxy)-6-acetylglucose	Phenolic acids	Phenolic acids	-	3	41233.7	52560.5	44097.8	48009.1	44197	70551.1	-
Lmgn002184	173.05	93.03	174.053	C7H10O5	[M-H]-	2-Oxoheptanedionic acid*	Organic acids	Organic acids	17126-90-8	1	1.33264e+07	8.70147e+06	7.13331e+06	7.39845e+06	9.92675e+06	1.4252e+07	C16588
Walp012413	329.268	237.22	328.261	C19H36O4	[M+H]+	2-Palmitoleoyl-Glycerol*	Lipids	Glycerol ester	-	3	62903.4	73756.5	69402.9	72961	66068	61141.6	-
Wagn012030	653.38	397.14	654.383	C31H58O14	[M-H]-	2-Palmitoyl-Sn-Glycerol 3-O-Diglucoside	Lipids	Glycerol ester	-	2	175888	222114	187371	228184	191753	197273	-
Lmxp006440	331.28	313.27	330.277	C19H38O4	[M+H]+	2-Palmitoylglycerol	Lipids	Glycerol ester	23470-00-0	1	65749.9	55581.1	67401.5	67352.3	60543.9	60075.9	-
MWS1909	227.237	55.054	226.23	C15H30O	[M+H]+	2-Pentadecanone	Others	Ketone compounds	2345-28-0	3	265088	252919	249788	266520	278073	254594	-
MWS1844	203.14	129.07	202.136	C14H18O	[M+H]+	2-Pentyl-3-phenyl-2-propenal	Others	Aldehyde compounds	122-40-7	3	96551	93589.1	101651	90711.7	94367.3	93521.9	C12288
Jmwp003339	285.132	123.04	284.126	C14H20O6	[M+H]+	2-Phenylethy-1-O-β-D-glucoside	Phenolic acids	Phenolic acids	18997-54-1	3	64232.4	51085	61429.5	66949.3	57503.2	77157.4	-
Labn004625	415.16	89.02	416.168	C19H28O10	[M-H]-	2-Phenylethyl beta-primeveroside	Others	Alcohol compounds	129932-48-5	1	827449	838912	996170	929145	828291	797983	-
MWS1787	94.07	53.04	93.0578	C6H7N	[M+H]+	2-Picoline; 2-Methylpyridine	Alkaloids	Pyridine alkaloids	109-06-8	3	511085	582429	378277	522961	444340	477383	C14447
pme1216	122.02	78.03	123.032	C6H5NO2	[M-H]-	2-Picolinic acid	Alkaloids	Pyridine alkaloids	98-98-6	3	62296.5	79937.1	70890.1	79018.3	63963.7	84199.6	C10164
MWSmce460	100.08	56.05	99.0684	C5H9NO	[M+H]+	2-Piperidone	Alkaloids	Piperidine alkaloids	675-20-7	3	49707.4	101797	97217.7	109275	97278.2	88111.2	-
Lmgn002555	173.08	59.01	174.089	C8H14O4	[M-H]-	2-Propylglutaric acid	Organic acids	Organic acids	32806-62-5	3	91755.6	115315	76802	87225.7	99521.2	92702.6	C16658
Zmgn001448	175.061	115.04	176.069	C7H12O5	[M-H]-	2-Propylmalic Acid	Organic acids	Organic acids	-	3	71999.7	51844.1	24492.8	21238.6	52361.9	52143.4	C05994
Lmbn002072	159.07	97.07	160.074	C7H12O4	[M-H]-	2-Propylsuccinic acid	Organic acids	Organic acids	618-57-5	3	14972	18821	19107.8	20826.5	17744.1	16904.8	C16657
Lmwp102803	328.26	159.07	327.256	C22H33NO	[M+H]+	2-Tridecyl-4(1H)-quinolone	Alkaloids	Quinoline alkaloids	-	3	1.56491e+06	1.5773e+06	1.64462e+06	1.54093e+06	1.53796e+06	1.54821e+06	-
MWS1812	171.174	55.054	170.167	C11H22O	[M+H]+	2-Undecanone	Others	Ketone compounds	112-12-9	3	1.17452e+06	1.25519e+06	1.07798e+06	1.33897e+06	1.33322e+06	1.31991e+06	C01875
Wccp000476	163.06	69.03	162.053	C6H10O5	[M+H]+	2-[(1R)-1-carboxyethoxy]propanoic acid	Organic acids	Organic acids	-	3	66696.1	51612.5	53290.6	70977.1	97781.7	73407.1	-
Wbjp002156	231.11	185.11	230.106	C13H14N2O2	[M+H]+	2-[(9R)-1,2,3,9-tetrahydropyrrolo[2,1-b]quinazolin-9-yl]acetic acid	Alkaloids	Alkaloids	-	3	1.41193e+06	1.57907e+06	1.01477e+06	1.44834e+06	1.48201e+06	1.64235e+06	-
Waqkp05977	353.27	261.22	352.261	C21H36O4	[M+H]+	2-g-linolenoyl-glycerol	Lipids	Glycerol ester	-	2	53073.5	94318.4	59278.4	42333.1	66955.1	63941.4	-
Jmgn005927	287.06	125.03	288.063	C15H12O6	[M-H]-	2-hydroxynaringenin	Flavonoids	Flavanones	-	3	28687.3	27424	28285.2	23203.4	35014.8	31178.6	-
Wcdp009528	313.27	57.07	312.266	C19H36O3	[M+H]+	2-oxononadecanoic acid	Lipids	Free fatty acids	-	3	1.59537e+06	1.25001e+06	1.53388e+06	1.59575e+06	1.88251e+06	1.6476e+06	-
Wasyqp2936	147.04	119.05	146.037	C9H6O2	[M+H]+	2-prop-2-ynylcyclohexa-2,5-diene-1,4-dione	Quinones	Quinones	-	1	6.81411e+06	8.0744e+06	7.50664e+06	7.56056e+06	7.43565e+06	7.69151e+06	-
Waptn04416	485.2	263.13	426.189	C21H30O9	[M+CH3COO]-	2-trans-abscisic acid D-glucosyl ester	Organic acids	Organic acids	-	3	39559.8	34532.4	55360.9	62433.6	62470.2	39675.1	-
Lmhp011388	353.27	261.22	352.261	C21H36O4	[M+H]+	2-α-Linolenoyl-glycerol*	Lipids	Glycerol ester	55268-58-1	1	2.04447e+06	2.0196e+06	2.0328e+06	2.09542e+06	1.91429e+06	1.93968e+06	-
Lakn003294	343.1	181.05	344.111	C15H20O9	[M-H]-	2-β-D-Glucopyranosyloxy-5-hydroxyphenylacetic acidmethylester*	Phenolic acids	Phenolic acids	-	3	630290	663572	649105	656096	664109	719884	-
Cmpk005216	335.22	299.2	334.214	C20H30O4	[M+H]+	20-nor-cofaryloside I	Terpenoids	Ditepenoids	2214215-17-3	1	3.00103e+06	3.87704e+06	3.6591e+06	3.33705e+06	3.23014e+06	3.87148e+06	-
Wbsp000331	529.39	529.39	528.381	C33H52O5	[M+H]+	21α-Hydroxyserrat-14-en-3β-yl propanedioic acid mono ester	Terpenoids	Terpene	-	3	2.9806e+06	2.67014e+06	3.34518e+06	3.20058e+06	3.35741e+06	2.81353e+06	-
pmp000446	531.234	369.18	530.226	C27H34N2O9	[M+H]+	22-O-Demethyl-22-O-glucosyl isocorynoxeine	Alkaloids	Plumerane	-	3	109101	113924	59930.7	150183	70434.4	109747	-
pmp000444	487.34	469.33	486.334	C30H46O5	[M+H]+	27,28-Dicarboxyl ursolic acid	Terpenoids	Triterpene	-	3	385108	378631	374366	492899	425216	414980	-
Zmyn005384	299.26	253.26	300.266	C18H36O3	[M-H]-	2R-Hydroxyoctadecanoic Acid*	Lipids	Free fatty acids	26633-48-7	1	1.44741e+06	1.09535e+06	1.68286e+06	1.60326e+06	1.56448e+06	1.50034e+06	C03042
Zmyn004732	293.21	185.12	294.219	C18H30O3	[M-H]-	2R-hydroxy-9Z,12Z,15Z-octadecatrienoic acid	Lipids	Free fatty acids	-	3	3.84096e+06	3.70782e+06	3.72065e+06	3.75057e+06	3.78266e+06	3.84557e+06	C16342
Lmgn013947	471.35	471.35	472.355	C30H48O4	[M-H]-	2α,3α-Dihydroxyolean-12-en-28-oic acid	Terpenoids	Triterpene	26563-68-8	3	1.24299e+06	1.25477e+06	1.22594e+06	1.09823e+06	1.15629e+06	1.23609e+06	-
Cmsp006710	275.13	137.06	274.12	C16H18O4	[M+H]+	3',4-Dihydroxy-3,5'-dimethoxybibenzyl	Others	Stilbene	83088-28-2	3	55612.8	54018.3	50077.1	85735.2	74019.9	59010.7	-
Lajp006634	593.15	345.1	592.143	C27H28O15	[M+H]+	3',5'-dihydroxy-5,7,4'-trimethoxyflavone-3'-（6''-malonylglucoside）	Flavonoids	Flavones	-	3	399814	379482	357188	322049	354708	344506	-
mws0874	346.06	211	347.063	C10H14N5O7P	[M-H]-	3'-Adenylic Acid	Nucleotides and derivatives	Nucleotides and derivatives	84-21-9	3	760654	698749	736203	653159	744885	790574	C01367
Hmsp004125	303.086	123.04	302.079	C16H14O6	[M+H]+	3'-Deoxy-4-O-methylsappanol	Others	Alcohol compounds	-	3	58224.7	61586.5	54620.6	51254.5	81988.3	100836	-
mws4113	353.14	295.06	354.147	C21H22O5	[M-H]-	3'-Hydroxy-4'-O-methylglabridin	Flavonoids	Other Flavonoids	175554-11-7	3	41634.5	35585.8	42849.6	42312.8	42985.1	42013.9	-
Lmgp004947	637.21	177.05	636.205	C30H36O15	[M+H]+	3'-Methoxycrenatoside	Phenolic acids	Phenolic acids	-	3	403745	488277	498644	354428	533704	415539	-
ZbYn010300	639.36	255.23	580.346	C28H52O12	[M+CH3COOH-H]-	3'-Palmitoyl sucrose	Others	Others	-	1	65331.8	80342.9	124740	101787	145010	82688.1	-
ZbYn009262	661.35	277.22	602.33	C30H50O12	[M+CH3COOH-H]-	3'-linoleoyl sucrose	Others	Others	-	1	27283.4	36186	40120.4	31011.6	36763.4	49677.5	-
Zbfn002169	487.15	145.03	488.153	C21H28O13	[M-H]-	3'-p-Coumaroyl-sucrose	Phenolic acids	Phenolic acids	-	3	96504.5	107944	91017.1	89276.5	88488.8	98611.6	-
Zbqn008291	473.361	473.361	474.371	C30H50O4	[M-H]-	3,13,15-Trihydroxyoleanane-12-one	Terpenoids	Triterpene	-	3	845499	933851	888355	908405	945381	962326	-
Lszp210002	489.36	453.34	488.35	C30H48O5	[M+H]+	3,19,23-Trihydroxyurs-12-en-28-oic acid (Barbinervic acid)	Terpenoids	Triterpene	-	3	427688	572674	459716	447877	517553	487320	-
pmn001591	487.34	469.33	488.35	C30H48O5	[M-H]-	3,19,23-Trihydroxyurs-12-en-28-oic acid (Rutundic acid)	Terpenoids	Triterpene	20137-37-5	2	150835	186913	174061	174068	180099	180165	-
Lmzn006169	471.35	471.35	472.355	C30H48O4	[M-H]-	3,19-Dihydroxyurs-12-en-28-oic acid (Pomolic acid)*	Terpenoids	Triterpene	13849-91-7	2	3.70482e+06	4.33581e+06	3.96894e+06	3.66996e+06	3.88961e+06	4.27679e+06	-
Lskp211434	665.39	503.34	664.382	C36H56O11	[M+H]+	3,23-Dihydroxy-24-oxo-olean-12-en-28-oic acid-28-O-glucoside	Terpenoids	Triterpene Saponin	-	3	383828	343401	330479	339708	514847	343037	-
Hmbn004734	455.32	455.32	456.324	C29H44O4	[M-H]-	3,23-Dihydroxy-30-noroleana-12,20(29)-dien-28-oic acid (30-Norhederagenin)	Terpenoids	Triterpene	117654-06-5	3	149740	517219	470029	213743	629974	520549	-
MWSmce560	471.35	441.33	472.355	C30H48O4	[M-H]-	3,23-Dihydroxylup-20(29)-en-28-oic acid (23-Hydroxybetulinic acid)	Terpenoids	Triterpene	85999-40-2	3	8730.99	12858.5	7496.11	11058.8	9739.88	12837.2	-
pmp000438	443.388	425.377	442.381	C30H50O2	[M+H]+	3,28-Dihydroxylup-20(29)-ene (Betulin)	Terpenoids	Triterpene	473-98-3	3	251066	258838	245352	298256	262217	274396	C08618
Zmlp007578	345.06	313.03	344.053	C17H12O8	[M+H]+	3,3',4-O-Trimethylellagic acid	Tannins	Tannin	1617-49-8	3	213650	256572	275777	215301	257128	260827	C10836
Lmzn001925	239.09	195.1	240.1	C12H16O5	[M-H]-	3,4'-Dihydroxy-3'-methoxybenzenepentanoic acid	Phenolic acids	Phenolic acids	-	3	31950.5	30742.7	25371.7	26681.3	20686.7	26065.6	-
Zmpn002440	287.06	135.05	288.063	C15H12O6	[M-H]-	3,4,2',4',6'-Pentahydroxychalcone	Flavonoids	Chalcones	73692-51-0	3	52975.4	69466	64429.5	67784.4	74870.2	67637.1	C15525
Lmsn003297	449.109	287.056	450.116	C21H22O11	[M-H]-	3,4,2',4',6'-Pentahydroxychalcone-4'-O-glucoside	Flavonoids	Chalcones	-	3	19861.2	27133.5	23173.7	18264.7	42873	38764.4	C16408
MWStz404	677.15	515.12	678.159	C34H30O15	[M-H]-	3,4,5-Tricaffeoylquinic acid	Phenolic acids	Phenolic acids	86632-03-3	1	535604	707807	620024	641357	643715	633311	-
pme0428	237.08	103.02	238.084	C12H14O5	[M-H]-	3,4,5-Trimethoxycinnamic acid	Phenolic acids	Phenolic acids	90-50-6	3	49071	61382.1	62604.5	51065.4	60523.3	62231.2	-
Zahn005516	195.07	150.03	196.074	C10H12O4	[M-H]-	3,4,5-trimethoxybenzaldehyde	Phenolic acids	Phenolic acids	86-81-7	3	22243.2	28677.5	18858	27831.7	24304.6	26105.1	-
MWStz043	531.15	163.04	530.142	C26H26O12	[M+H]+	3,4-Di-O-caffeoylquinic acid methyl ester	Phenolic acids	Phenolic acids	114637-83-1	1	1.97132e+07	1.78157e+07	2.25025e+07	2.10853e+07	2.4818e+07	2.55111e+07	-
Wacyn06184	483.13	163.04	484.137	C25H24O10	[M-H]-	3,4-Di-O-p-Coumaroylquinic acid*	Phenolic acids	Phenolic acids	-	1	296219	330615	270236	298397	343573	343299	-
MWStz045	192.065	146.061	191.058	C10H9NO3	[M+H]+	3,4-Dihydro-6,7-(methylenedioxy)-2(1H)-quinolinone*	Alkaloids	Quinoline alkaloids	94527-34-1	3	411201	406100	403828	468463	421631	444636	-
Lmyp003951	227.09	181.09	226.084	C11H14O5	[M+H]+	3,4-Dihydroxy-3-methoxypropiophenone	Others	Ketone compounds	-	3	195755	148601	214434	177715	181594	136143	-
pme3827	198.08	152.07	197.069	C9H11NO4	[M+H]+	3,4-Dihydroxy-L-phenylalanine (L-Dopa)	Amino acids and derivatives	Amino acids and derivatives	59-92-7	3	195435	317975	187711	112078	162692	161273	C00355
pme2598	167.03	123.05	168.042	C8H8O4	[M-H]-	3,4-Dihydroxybenzeneacetic acid*	Phenolic acids	Phenolic acids	102-32-9	3	52283.7	65179.8	76999.9	84564.7	62730.3	98458.6	C01161
mws0183	153.02	109.03	154.027	C7H6O4	[M-H]-	3,4-Dihydroxybenzoic acid (Protocatechuic acid)*	Phenolic acids	Phenolic acids	99-50-3	3	1.37446e+06	1.46193e+06	1.51118e+06	1.39266e+06	1.44705e+06	1.34987e+06	C00230
MWStz104	182.08	124.05	181.074	C9H11NO3	[M+H]+	3,4-Dimethoxybenzamide	Alkaloids	Alkaloids	1521-41-1	3	41886.7	51640.6	41365.4	64752.1	51428.2	29366.6	-
MWSmce332	209.08	191.07	208.074	C11H12O4	[M+H]+	3,4-Dimethoxycinnamic acid	Phenolic acids	Phenolic acids	2316-26-9	3	1.24165e+06	1.27096e+06	1.19866e+06	1.3897e+06	1.33948e+06	1.29324e+06	-
mws0612	195.07	121.03	196.074	C10H12O4	[M-H]-	3,4-Dimethoxyphenyl acetic acid	Phenolic acids	Phenolic acids	93-40-3	1	46878.3	42599.6	61489.1	46718.3	57352.6	49059.7	-
Zahp007439	177.05	149.02	176.047	C10H8O3	[M+H]+	3,4-Methylenedioxycinnamaldehyde	Others	Aldehyde compounds	58095-77-5	1	2.88105e+06	1.46259e+06	1.39801e+06	2.27575e+06	1.96623e+06	2.12343e+06	-
Wacyp05914	467.13	147.04	466.126	C25H22O9	[M+H]+	3,4-O-Di-p-Coumaroylshikimic acid	Phenolic acids	Phenolic acids	-	3	768224	839875	884119	981586	755026	1.04694e+06	-
Jmzn006005	177.06	117.04	178.063	C10H10O3	[M-H]-	3,4-methylenedioxy cinnamyl alcohol	Others	Alcohol compounds	58095-76-4	1	340223	335015	305005	328037	328905	340721	-
Lmjp004941	301.071	286.047	300.063	C16H12O6	[M+H]+	3,5,4'-Trihydroxy-7-methoxyflavone (Rhamnocitrin)*	Flavonoids	Flavonols	569-92-6	3	494839	631941	569384	577357	572206	594690	C17059
Hmyp002315	303.04	257.04	302.043	C15H10O7	[M+H]+	3,5,7,4'-Tetrahydroxy-Coumaronochromone	Others	Chromone	-	3	188280	179258	152299	163347	186320	148360	-
Wacyn06270	483.13	163.04	484.137	C25H24O10	[M-H]-	3,5-Di-O-p-Coumaroylquinic acid*	Phenolic acids	Phenolic acids	-	1	82345.2	129431	98397.3	79464.6	115337	91821.3	-
Walbp08551	235.17	179.11	234.161	C15H22O2	[M+H]+	3,5-Di-tert-butylbenzoic acid	Phenolic acids	Phenolic acids	16225-26-6	2	6.30306e+06	5.84598e+06	5.86751e+06	6.29086e+06	5.96456e+06	6.01327e+06	-
Wmzn002116	515.12	353.09	516.127	C25H24O12	[M-H]-	3,5-Dicaffeoylquinic acid	Phenolic acids	Phenolic acids	-	1	1.01931e+07	9.99325e+06	1.38532e+07	1.3418e+07	1.08023e+07	8.88119e+06	-
Lahp002608	188.07	118.07	187.063	C11H9NO2	[M+H]+	3,5-Dihydro-2H-Furo[3,2-C]Quinolin-4-One*	Alkaloids	Quinoline alkaloids	-	1	1.03044e+06	1.09543e+06	1.16265e+06	1.07297e+06	1.1e+06	1.00411e+06	-
HJN037	183.03	124.02	184.037	C8H8O5	[M-H]-	3,5-Dihydroxy-4-methoxybenzoic acid; 4-O-Methylgallic Acid*	Phenolic acids	Phenolic acids	4319-02-2	3	52242.4	44318	46160.1	42191.4	49033.8	46828.2	-
Lmgn009690	313.07	255.03	314.079	C17H14O6	[M-H]-	3,5-Dihydroxy-7,4'-dimethoxyflavone	Flavonoids	Flavonols	15486-33-6	1	30850.8	30082	29538.5	37616.6	25473.8	24848.1	-
Walbp08560	249.18	193.13	248.178	C16H24O2	[M+H]+	3,5-di-tert-Butyl-4-hydroxyacetophenone	Others	Ketone compounds	14035-33-7	2	2.04655e+06	1.98166e+06	2.14204e+06	2.08507e+06	1.99836e+06	1.98938e+06	-
Lmsn004970	503.12	179.04	504.127	C24H24O12	[M-H]-	3,6-Di-O-caffeoyl glucose	Phenolic acids	Phenolic acids	-	1	457432	534932	515562	455338	460378	466901	-
Lmyn004949	269.04	133.03	270.053	C15H10O5	[M-H]-	3,7,3'-Trihydroxyflavone	Flavonoids	Flavones	-	3	15651.3	10720.3	16519.9	15138.2	14259.9	10702	-
Hmsp003093	179.03	77.04	178.027	C9H6O4	[M+H]+	3,7-Dihydroxychromen-4-one	Others	Chromone	-	3	324292	285698	310336	308552	280635	305479	-
Wacyp05774	496.28	163.06	478.241	C22H38O11	[M+NH4]+	3,7-Dimethyl-2,6-octadienyl 6-O-(Beta-D-Glucopyranosyl)-Beta-D-glucopyranoside	Terpenoids	Monoterpenoids	-	3	1.81028e+06	1.96546e+06	2.37579e+06	1.97839e+06	1.91889e+06	1.32048e+06	-
Walbn08189	504.31	279.23	505.317	C25H48NO7P	[M-H]-	3-(((2-(dimethylamino)ethoxy)(hydroxy)phosphoryl)oxy)-2-hydroxypropyl (9Z,12Z)-octadeca-9,12-dienoate*	Lipids	LPE	-	2	296797	312519	309817	314206	285396	338987	-
Walbn07770	502.29	277.22	503.301	C25H46NO7P	[M-H]-	3-(((2-(dimethylamino)ethoxy)(hydroxy)phosphoryl)oxy)-2-hydroxypropyl (9Z,12Z,15E)-octadeca-9,12,15-trienoate	Lipids	LPE	-	2	688307	787316	753388	731976	766349	701757	-
Walbn08698	506.32	281.25	507.332	C25H50NO7P	[M-H]-	3-(((2-(dimethylamino)ethoxy)(hydroxy)phosphoryl)oxy)-2-hydroxypropyl oleate	Lipids	LPE	-	2	5.97499e+06	6.33831e+06	6.08366e+06	6.1991e+06	6.14197e+06	6.12893e+06	-
Wagp002074	325.19	163.13	324.178	C14H28O8	[M+H]+	3-(1-hydroxyethyl)-4-methylpentane-1,4-diol O-Glucoside	Others	Alcohol compounds	-	3	737103	413368	676853	419900	664316	636711	-
Zblp004317	206.08	120.09	205.074	C11H11NO3	[M+H]+	3-(2-oxopropyl)-3-hydroxyindolin-2-one	Alkaloids	Plumerane	-	2	7.71587e+06	8.96414e+06	7.98975e+06	8.74462e+06	8.10536e+06	8.82306e+06	-
Wbkp005691	271.11	225.1	270.1	C15H14N2O3	[M+H]+	3-(4-methoxy-9H-pyrido[3,4-b]indol-1-yl)propanoic acid	Alkaloids	Alkaloids	-	3	277306	265342	221989	269125	289852	327836	-
Wcgp010223	277.22	93.07	276.209	C18H28O2	[M+H]+	3-(Cyclohexen-1-yl)-2-hydroxy-4a,5-dimethyl-2,3,4,5,6,7,8,8a-octahydronaphthalen-1-one	Others	Others	-	3	5.50929e+06	5.49507e+06	5.43863e+06	5.45439e+06	5.43848e+06	5.44557e+06	-
Zbfn003303	337.09	163.04	338.1	C16H18O8	[M-H]-	3-(Hydroxycinnamoyl)-quinic acid*	Phenolic acids	Phenolic acids	-	1	2.12698e+06	2.0741e+06	2.25839e+06	1.59952e+06	2.17655e+06	2.42433e+06	-
Zbqp000579	156.08	110.07	155.07	C6H9N3O2	[M+H]+	3-(Pyrazol-1-yl)-L-alanine	Amino acids and derivatives	Amino acids and derivatives	2734-48-7	1	718227	904605	985166	1.04994e+06	1.56893e+06	1.74045e+06	-
Zbqp000676	203.15	116.07	202.143	C8H18N4O2	[M+H]+	3-(triazan-2-yl)propyl L-prolinate	Amino acids and derivatives	Amino acids and derivatives	-	1	1.14646e+06	1.25014e+06	1.13139e+06	1.11453e+06	1.10333e+06	1.03938e+06	-
Wbmn009893	393.22	333.21	394.236	C22H34O6	[M-H]-	3-Acetoxy-9,13-epoxy-16-hydroxy-labda-15,16-olide	Terpenoids	Ditepenoids	-	3	100943	101511	92333.4	92293.5	91478.8	86852.4	-
mws0444	152.04	108.05	153.043	C7H7NO3	[M-H]-	3-Aminosalicylic acid	Phenolic acids	Phenolic acids	570-23-0	3	45236.7	61493.5	42425.8	49605.4	45837.8	45892.5	-
Wacyn07140	483.13	321.1	484.137	C25H24O10	[M-H]-	3-Cinnamoyl-5-Caffeoylquinic acid	Phenolic acids	Phenolic acids	-	1	888363	981055	884822	1.0494e+06	894755	971739	-
Lmbn000198	133.01	71.01	134.022	C4H6O5	[M-H]-	3-Dehydro-L-Threonic Acid	Others	Saccharides	-	1	952505	468310	939391	866746	728763	689900	C03064
ML10176345	171.03	109.03	172.037	C7H8O5	[M-H]-	3-Dehydroshikimic acid	Organic acids	Organic acids	2922-42-1	3	32478.4	22171.2	31146	24400.5	29766.5	43210.1	C02637
Lskp211268	179.07	119.05	178.063	C10H10O3	[M+H]+	3-Ethyl-7-hydroxyphthalide	Others	Others	-	3	785660	770305	799972	673456	791303	800213	-
MWStz003	192.07	146.06	191.058	C10H9NO3	[M+H]+	3-Furfuryl-2-pyrrolecarboxylate*	Alkaloids	Pyrrole alkaloids	119767-00-9	3	519125	548507	461294	495046	472159	458983	-
Hmhn002738	111.01	67.02	112.016	C5H4O3	[M-H]-	3-Furoic acid	Organic acids	Organic acids	488-93-7	3	19681.5	15426.7	14999.9	18986.7	15948.4	18442.8	-
Zmpn000638	130.05	88.04	131.07	C4H9N3O2	[M-H]-	3-Guanidinopropionic acid	Organic acids	Organic acids	353-09-3	3	36087.3	45506.4	45143.9	25196.7	29346.4	39423.9	C03065
Walbp07454	415.21	119.09	414.204	C24H30O6	[M+H]+	3-Hydrocinnamyl-6-CinnamylGlucose	Others	Alcohol compounds	-	2	385026	254698	273668	309041	345608	313138	-
pmp000441	471.347	453.336	470.34	C30H46O4	[M+H]+	3-Hydroxy-11-oxours-12-en-28-oic acid (11-Keto-ursolic acid)	Terpenoids	Triterpene	105870-59-5	3	1.85148e+06	2.24049e+06	1.97297e+06	2.44342e+06	2.19537e+06	2.16364e+06	-
Zjxp110302	295.23	81.07	294.219	C18H30O3	[M+H]+	3-Hydroxy-3,7,11-trimethyldodeca-1,6E,10-trien-9-yl isobutyrate	Terpenoids	Sesquiterpenoids	-	3	722652	878064	817184	849831	789459	805892	-
MWStz282	206.081	118.065	205.074	C11H11NO3	[M+H]+	3-Hydroxy-3-acetonyloxindole*	Alkaloids	Plumerane	33417-17-3	2	2.14164e+06	2.31351e+06	2.09167e+06	2.17071e+06	2.36056e+06	2.10621e+06	-
pme2914	161.05	99.05	162.053	C6H10O5	[M-H]-	3-Hydroxy-3-methylpentane-1,5-dioic acid	Organic acids	Organic acids	503-49-1	1	536020	585898	545113	198566	475954	622942	C03761
pmn001690	327.14	165.09	328.152	C16H24O7	[M-H]-	3-Hydroxy-4-isopropylbenzylalcohol-3-O-glucoside	Others	Alcohol compounds	-	3	1.92465e+06	2.34693e+06	1.66881e+06	2.21423e+06	2.15127e+06	1.95839e+06	-
MWSslk066	169.05	65.04	168.042	C8H8O4	[M+H]+	3-Hydroxy-4-methoxybenzoic acid; Isovanillic Acid	Phenolic acids	Phenolic acids	645-08-9	3	64575.5	105762	93694.6	79393.9	97221.8	69696.8	-
MWS04559g	182.08	136.08	181.074	C9H11NO3	[M+H]+	3-Hydroxy-L-phenylalanine*	Amino acids and derivatives	Amino acids and derivatives	587-33-7	1	3.68077e+06	3.11458e+06	3.74328e+06	2.69766e+06	3675743	2.84784e+06	C20807
Zmyn005252	285.24	239.24	286.251	C17H34O3	[M-H]-	3-Hydroxy-palmitic acid methyl ester	Lipids	Free fatty acids	51883-36-4	3	316452	253669	340566	323294	298118	294328	C11849
mws0596	154.05	136.04	153.043	C7H7NO3	[M+H]+	3-Hydroxyanthranilic acid	Alkaloids	Alkaloids	548-93-6	3	96506.8	63505.2	62371.5	53680.4	90934.6	87186	C00632
MWSmce248	163.045	119.054	164.047	C9H8O3	[M-H]-	3-Hydroxycinnamic Acid*	Phenolic acids	Phenolic acids	14755-02-3	3	837564	733488	1.04511e+06	698984	655962	669055	C12621
Lmmn008971	455.35	455.35	456.36	C30H48O3	[M-H]-	3-Hydroxycycloarta-24-ene-26-oic acid (Isomangiferolic acid)*	Terpenoids	Triterpene	13878-92-7	3	40632	41259.6	53416.6	41347.6	45855.2	36613.6	-
MW0014090	271.23	225.22	272.235	C16H32O3	[M-H]-	3-Hydroxyhexadecanoic acid	Lipids	Free fatty acids	2398-34-7	3	81758.5	86216.8	71756.6	76262.8	58881.9	90369.9	-
MWSHC20176	455.35	455.35	456.36	C30H48O3	[M-H]-	3-Hydroxylup-20(29)-en-28-oic acid (Betulinic acid)*	Terpenoids	Triterpene	472-15-1	3	38585.8	55406.2	41730.9	50125	39985.7	40824.1	C08619
Lmqn008288	299.26	299.26	300.266	C18H36O3	[M-H]-	3-Hydroxyoctadecanoic Acid	Lipids	Free fatty acids	45261-96-9	1	9.02054e+06	8.46906e+06	8.30647e+06	8.93201e+06	8.78587e+06	8.15322e+06	-
mws1389	455.35	455.35	456.36	C30H48O3	[M-H]-	3-Hydroxyolean-12-en-28-oic acid (Oleanolic acid)*	Terpenoids	Triterpene	508-02-1	3	328378	325360	323906	280379	298630	332214	C17148
MWSmce052	455.36	455.36	456.36	C30H48O3	[M-H]-	3-Hydroxyurs-12-en-28-oic acid (3-Epiursolic acid)*	Terpenoids	Triterpene	989-30-0	3	289541	283905	236959	257701	241347	280829	-
mws4053	455.353	455.353	456.36	C30H48O3	[M-H]-	3-Hydroxyurs-12-en-28-oic acid (Ursolic acid)*	Terpenoids	Triterpene	77-52-1	3	100547	106080	118628	100597	107992	116883	C08988
Lmsp102911	487.342	423.326	486.334	C30H46O5	[M+H]+	3-Hydroxyurs-12-ene-27,28-dioic acid (Quinovic acid)	Terpenoids	Triterpene	465-74-7	3	108584	121918	99341.3	118720	91668.2	111981	-
Hmmp001310	188.071	118.065	187.063	C11H9NO2	[M+H]+	3-Indoleacrylic acid*	Alkaloids	Plumerane	1204-06-4	1	1.09461e+06	1.14859e+06	1.08567e+06	1.13768e+06	1.05305e+06	1.19484e+06	C21283
pme2244	190.09	118.07	189.079	C11H11NO2	[M+H]+	3-Indolepropionic acid	Alkaloids	Plumerane	830-96-6	3	983216	1.33953e+06	1.07844e+06	1.16675e+06	1.08179e+06	1.05576e+06	C22236
Waqkp01044	212.09	149.06	211.084	C10H13NO4	[M+H]+	3-Methoxytyrosine	Amino acids and derivatives	Amino acids and derivatives	7636-26-2	1	3.03155e+06	3.68164e+06	3.23635e+06	3.33174e+06	3.48773e+06	3.31425e+06	-
mws0823	115.04	71.01	116.047	C5H8O3	[M-H]-	3-Methyl-2-Oxobutanoic acid	Organic acids	Organic acids	759-05-7	3	24684.2	33672.8	28652	32168.5	29019.4	33454.4	C00141
pme0181	170.092	124.088	169.085	C7H11N3O2	[M+H]+	3-Methyl-L-Histidine	Amino acids and derivatives	Amino acids and derivatives	368-16-1	3	446747	471969	499075	366073	488638	498233	C01152
Lmbn000216	147.03	57.0344	148.037	C5H8O5	[M-H]-	3-Methylmalic acid*	Organic acids	Organic acids	152204-30-3	1	180058	175137	142910	179788	199771	191544	C06032
pme1266	167.06	124.05	166.049	C6H6N4O2	[M+H]+	3-Methylxanthine	Nucleotides and derivatives	Nucleotides and derivatives	1076-22-8	3	8.02461e+06	7.53257e+06	7.84396e+06	8.21113e+06	8.55201e+06	7.70411e+06	C16357
Zmpn001713	138.02	108.02	139.027	C6H5NO3	[M-H]-	3-Nitrophenol	Others	Others	554-84-7	3	12636	19858.9	13221.3	19301.8	24376.5	14744.1	C14418
Zbfn004208	503.12	323.08	504.127	C24H24O12	[M-H]-	3-O-(3-Methoxy-4-hydroxybenzoyl)-4-O-caffeoylquinic acid	Phenolic acids	Phenolic acids	-	1	319859	427227	340324	340827	386097	387434	-
Wacyn05614	499.12	337.09	500.132	C25H24O11	[M-H]-	3-O-Caffeoyl-4-O-p-Coumaroylquinic acid*	Phenolic acids	Phenolic acids	-	1	565268	645406	502734	711343	684851	608341	-
Wacyn05736	499.12	337.09	500.132	C25H24O11	[M-H]-	3-O-Caffeoyl-5-O-p-Coumaroylquinic acid*	Phenolic acids	Phenolic acids	-	1	882939	906829	903195	1.35645e+06	1.14337e+06	1.17758e+06	-
Wacyp06810	467.13	163.04	466.126	C25H22O9	[M+H]+	3-O-Cinnamoyl-5-O-caffeoylshikimic acid	Phenolic acids	Phenolic acids	-	1	1.63095e+06	1.56279e+06	1.69311e+06	1.82084e+06	1.59629e+06	1.77247e+06	-
Wasyqn3917	399.09	223.05	400.101	C17H20O11	[M-H]-	3-O-Feruloyl Methylglucaric Acid	Phenolic acids	Phenolic acids	-	3	28854.2	22332.2	25407.7	37914.3	28215	38621.4	-
MWStz537	367.1	193.05	368.111	C17H20O9	[M-H]-	3-O-Feruloylquinic acid	Phenolic acids	Phenolic acids	1899-29-2	1	1.0523e+06	1.21236e+06	1.01533e+06	1.14784e+06	1.24391e+06	1.20063e+06	-
pmb2833	529.16	193.1	530.164	C23H30O14	[M-H]-	3-O-Feruloylquinic acid-O-glucoside	Phenolic acids	Phenolic acids	-	2	1.22398e+06	1.1894e+06	1.23616e+06	1.2065e+06	1.33991e+06	1.23493e+06	-
Hmln000659	331.07	169.01	332.074	C13H16O10	[M-H]-	3-O-Galloyl-D-glucose*	Phenolic acids	Phenolic acids	-	3	77122.8	123306	80002.9	102029	70647.2	72268.8	-
Lmxn008129	971.45	809.43	972.457	C47H72O21	[M-H]-	3-O-Glucosyl-2,3-dihydroxy-30-norolean-12,20(29)-diene-23,28-dioic acid-23,28-di-O-glucosyl ester	Terpenoids	Triterpene Saponin	-	2		10728.1	9371.09	15827.9	14190	18404.5	-
Wayn006004	394.97	315.02	395.979	C15H8O11S	[M-H]-	3-O-Methylellagic acid 4'-sulfate*	Tannins	Tannin	-	3	37431.3	44040.5	36301.5	26116.4	44440.7	47740.4	-
Wayn005852	394.97	315.02	395.979	C15H8O11S	[M-H]-	3-O-Methylellagic acid 4-sulfate*	Tannins	Tannin	-	3	39956.4	35140.8	36140.2	30336.2	57705.3	53669.2	-
Lmsn008201	779.46	617.41	780.466	C42H68O13	[M-H]-	3-O-[Glucosyl(1→2)glucosyl]olean-12-en-28-oic acid (Acutoside A)	Terpenoids	Triterpene Saponin	58231-99-5	3	30101.5	52160.3	32513.7	34183.8	27812.2	32489.9	-
Lhmp122022	561.16	207.07	560.153	C27H28O13	[M+H]+	3-O-caffeioyl sinapyl quinic acid	Others	Others	-	1	263395	257536	193616	206347	195315	204086	-
Lhmp122025	723.21	207.07	722.206	C33H38O18	[M+H]+	3-O-caffeioyl sinapyl quininyl glucoside	Others	Others	-	2	229777	156250	282355	187640	256617	299119	-
ZbBn004947	349.09	193.05	350.1	C17H18O8	[M-H]-	3-O-feruloyl-shikimicAcid	Phenolic acids	Phenolic acids	-	2	141865	127733	311603	263192	225057	145714	-
Waln003350	341.09	195.05	342.095	C15H18O9	[M-H]-	3-O-p-Coumaroyl Galactonic Acid	Phenolic acids	Phenolic acids	-	3	871309	845528	873138	861545	902762	861734	-
pmn001421	337.093	191.056	338.1	C16H18O8	[M-H]-	3-O-p-Coumaroylquinic acid*	Phenolic acids	Phenolic acids	87099-71-6	1	5.86273e+06	6.17106e+06	6.15509e+06	6.54577e+06	6.17531e+06	6.03983e+06	-
pmb3075	319.08	145.03	320.09	C16H16O7	[M-H]-	3-O-p-Coumaroylshikimic acid	Phenolic acids	Phenolic acids	-	3	490421	558452	772074	745687	442277	661922	-
ZbYn009419	661.35	277.22	602.33	C30H50O12	[M+CH3COOH-H]-	3-Oleoyl sucrose	Others	Others	-	1	39746.1	28637.1	30548.4	34592.4	37781	36733.3	-
Labp004808	533.26	133.1	532.252	C25H40O12	[M+H]+	3-Oxo-Alpha-Ionol diglucoside	Terpenoids	Sesquiterpenoids	-	3	86249.1	81912.5	50631.1	54867.5	83842.8	61717.7	-
Lmmp004382	371.21	191.14	370.199	C19H30O7	[M+H]+	3-Oxo-alpha-ionol glucoside	Terpenoids	Sesquiterpenoids	-	3	586408	716662	539948	504608	517962	519332	-
MWSslk207	453.34	371.25	454.345	C30H46O3	[M-H]-	3-Oxolanosta-8,24-dien-21-oic acid (Beta-Elemonic acid)	Terpenoids	Triterpene	28282-25-9	3	3732.4	3748.35	4760.62	4645.76	2857.05	4863.96	-
Lmhp013004	455.35	315.23	454.345	C30H46O3	[M+H]+	3-Oxolanosta-9(11),24-dien-26-oic acid (Coccinic Acid)	Terpenoids	Triterpene	-	3	40143.6	36837.9	40002.4	42245.8	38445.4	44432	-
Lmtn003598	367.14	205.08	368.147	C18H24O8	[M-H]-	3-Prenyl-4-O-glucosyloxy-4-hydroxybenzoic acid	Phenolic acids	Phenolic acids	-	3	111876	110149	98502.4	112100	110915	115164	-
ZbBn002246	215.06	137.03	216.063	C9H12O6	[M-H]-	3-acetyl-ShikimicAcid	Organic acids	Organic acids	-	3	32808.1	41493.6	20132	30090.7	31616.5	37818.3	-
Hmgp002327	188.07	118.06	187.063	C11H9NO2	[M+H]+	3-amino-2-naphthoic acid*	Alkaloids	Alkaloids	-	1	1.06683e+06	1.12712e+06	1.04655e+06	1.08189e+06	1.17545e+06	1.165e+06	-
Lmgp002593	123.044	77.04	122.037	C7H6O2	[M+H]+	3-hydroxybenzaldehyde	Phenolic acids	Phenolic acids	100-83-4	3	126452	161009	125642	129255	127986	157884	C03067
ZbBn002068	187.06	143.08	188.069	C8H12O5	[M-H]-	3-methyl-ShikimicAcid	Organic acids	Organic acids	-	3	40135.1	30657.4	41815.7	51960.6	30026.4	42734.7	-
Lcfn121089	269.21	225.22	270.219	C16H30O3	[M-H]-	3-oxopalmiticacid	Lipids	Free fatty acids	-	1	133344	115228	119243	117141	119071	109124	-
Zblp001009	272.11	110.06	271.106	C12H17NO6	[M+H]+	3-pyridine-methanol-O-β-D-glucopyranosyl*	Alkaloids	Pyridine alkaloids	-	1	3.04469e+06	2.78842e+06	3.14117e+06	2.95278e+06	3.1839e+06	2.72118e+06	-
Ladp002935	190.05	144.04	189.043	C10H7NO3	[M+H]+	3-quinolinecarboxylic acid	Alkaloids	Quinoline alkaloids	-	3	99824.4	89804.3	64796	79003.3	121547	83223.3	-
Yalp003517	249.11	159.08	248.105	C14H16O4	[M+H]+	30-Hydroxyfraxinellone	Terpenoids	Sesquiterpenoids	-	3	312284	335064	339435	347660	361753	281470	-
Qmgp102423	547.23	385.18	546.221	C27H34N2O10	[M+H]+	3α-Dihydrocadambine	Alkaloids	Plumerane	54483-84-0	2	3.34276e+06	2.19674e+06	3.54488e+06	3.24074e+06	4.37927e+06	1.86068e+06	-
Zadp006809	275.2	119.08	274.193	C18H26O2	[M+H]+	3β,12-dihydroxy-13-methyl-podocarpane-8,10,13-tiene	Terpenoids	Ditepenoids	-	3	528699	605904	594383	580999	642196	610906	-
Lmhp002748	563.223	401.167	562.216	C27H34N2O11	[M+H]+	3β-Isodihydrocadambine 4-oxide	Alkaloids	Alkaloids	1092371-18-0	3	142549	154691	87002.4	141168	76276.9	113075	-
Lmsp008392	315.09	272.07	314.079	C17H14O6	[M+H]+	4',5-Dihydroxy-3',5'-dimethoxyflavone	Flavonoids	Flavones	-	1	35989.8	45424.2	33753.2	33385.3	35656	49362.8	-
MWSslk166	255.066	137.024	254.058	C15H10O4	[M+H]+	4',5-Dihydroxyflavone	Flavonoids	Flavones	6665-67-4	3	125693	148214	140177	154442	145238	158173	-
MWSslk075	225.092	131.05	224.084	C15H12O2	[M+H]+	4'-Hydroxychalcone	Flavonoids	Chalcones	2657-25-2	3	38576.8	43875.1	49350.6	56983.5	50528.4	61140.4	C14232
MWSslk146	595.17	433.12	594.159	C27H30O15	[M+H]+	4'-O-Glucosylvitexin	Flavonoids	Flavones	38950-94-6	3	480502	603569	466921	476555	430780	590002	-
Hmtp000776	168.07	105.03	167.058	C8H9NO3	[M+H]+	4,5,6-Trihydroxy-2-cyclohexen-1-ylideneacetonitrile	Alkaloids	Alkaloids	-	3	886018	1.02639e+06	964388	983977	954411	997979	-
Lmqn005782	193.05	133.03	194.058	C10H10O4	[M-H]-	4,5,8-Trihydroxy-α-tetralone	Quinones	Naphthol	-	1	3.22462e+06	3.54456e+06	3.32303e+06	3.29584e+06	3.53883e+06	3.53612e+06	-
Lmqn005611	517.13	193.05	518.142	C25H26O12	[M-H]-	4,5,8-Trihydroxy-α-tetralone-5-O-[6'-O-(4''-acetoxylbenzoyl)]glucoside	Quinones	Quinones	-	3	188806	319848	239302	149527	197029	246627	-
Zmmp000635	130.09	84.08	129.079	C6H11NO2	[M+H]+	4,5-Dehydro-L-leucine	Amino acids and derivatives	Amino acids and derivatives	-	2	1.35596e+07	1.42641e+07	1.48247e+07	1.26959e+07	1.51691e+07	1.40623e+07	-
Lmgp001898	162.06	116.05	161.048	C9H7NO2	[M+H]+	4,6-Dihydroxyquinoline	Alkaloids	Quinoline alkaloids	3517-61-1	2	74030.2	41228.6	84144.1	72403.9	107026	68301.4	C05639
Zmtn001464	204.03	160.04	205.037	C10H7NO4	[M-H]-	4,8-Dihydroxyquinoline-2-carboxylic acid	Alkaloids	Quinoline alkaloids	59-00-7	3	53415.5	62742.9	57676.1	60172.6	67066.4	44222.1	C02470
Waptp01054	136.07	91.05	135.068	C8H9NO	[M+H]+	4-(2-aminoethenyl)phenol*	Alkaloids	Alkaloids	-	3	9.63774e+06	8.1961e+06	1.05111e+07	6.957e+06	9.76352e+06	7.59128e+06	-
pme0295	146.08	86.06	145.074	C6H11NO3	[M+H]+	4-Acetamidobutyric acid	Organic acids	Organic acids	3025-96-5	3	471841	637426	542490	660400	567094	570026	C02946
mws1336	138.06	120.04	137.048	C7H7NO2	[M+H]+	4-Aminobenzoic acid	Phenolic acids	Phenolic acids	150-13-0	2	6.08578e+06	7.79704e+06	6.67989e+06	6.21238e+06	6.39888e+06	6.35347e+06	C00568
ML10177402	152.03	108.05	153.043	C7H7NO3	[M-H]-	4-Aminosalicylic acid	Phenolic acids	Phenolic acids	65-49-6	3	46889	54579.8	52202.8	58590.2	52302.1	49248.9	C02518
Wacyp06607	485.14	163.04	484.137	C25H24O10	[M+H]+	4-Cinnamoyl-5-Caffeoylquinic acid	Phenolic acids	Phenolic acids	-	2	202442	357271	312211	292230	350319	253453	-
Zmcn005156	529.13	353.08	530.142	C26H26O12	[M-H]-	4-Feruloyl-5-O-Caffeoylquinic Acid	Phenolic acids	Phenolic acids	188742-80-5	2	695234	671198	664327	739733	682706	710759	-
mws0567	146.09	87.04	145.085	C5H11N3O2	[M+H]+	4-Guanidinobutyric acid	Organic acids	Organic acids	463-00-3	2	2.20941e+06	2.26074e+06	2.35237e+06	2.511e+06	2.23135e+06	2.50616e+06	C01035
Lmbn001364	131.03	87.05	132.042	C5H8O4	[M-H]-	4-Hydroxy-2-Oxopentanoic Acid*	Organic acids	Organic acids	3318-73-8	1	25716.4	22228.5	22930.2	21697.9	18406.3	23096	C03589
pme2761	161.01	73.03	162.016	C5H6O6	[M-H]-	4-Hydroxy-2-oxoglutaric acid	Organic acids	Organic acids	1187-99-1	3	35775.7	38629	41867.4	36419.7	35102.8	29419.3	C01127
MWSmce190	148.093	74.0223	147.089	C6H13NO3	[M+H]+	4-Hydroxy-L-Isoleucine	Amino acids and derivatives	Amino acids and derivatives	781658-23-9	3	48166	71266.5	35562.4	61548.2	60914.9	79391.5	-
pme2758	162.04	144.03	163.048	C5H9NO5	[M-H]-	4-Hydroxy-L-glutamic acid	Amino acids and derivatives	Amino acids and derivatives	3913-68-6	3	32355.8	33371.8	24006.4	31856.4	32856.2	39029	C03079
mws3109	168.07	123.04	167.058	C8H9NO3	[M+H]+	4-Hydroxy-L-phenylglycine	Amino acids and derivatives	Amino acids and derivatives	32462-30-9	3	28629.8	11409.7	28884.2	37327.9	33913.8	32275.7	-
MWSmce466	135.05	92.03	136.052	C8H8O2	[M-H]-	4-Hydroxyacetophenone	Others	Ketone compounds	99-93-4	3	21948.4	24480.8	21628.8	27420.4	31881.3	27002.5	C10700
mws0628	121.03	92.03	122.037	C7H6O2	[M-H]-	4-Hydroxybenzaldehyde	Others	Aldehyde compounds	123-08-0	3	283655	375423	341227	305880	333759	352727	C00633
mws0749	137.02	93.03	138.032	C7H6O3	[M-H]-	4-Hydroxybenzoic acid	Phenolic acids	Phenolic acids	99-96-7	3	1.30254e+06	1.49903e+06	1.34041e+06	1.36969e+06	1.28654e+06	1.4196e+06	C00156
pme2996	161.02	117.03	162.032	C9H6O3	[M-H]-	4-Hydroxycoumarin	Lignans and Coumarins	Coumarins	1076-38-6	3	71060.3	99708.8	43141.1	59175.7	56269.3	97260.1	C20414
pmb2723	485.13	323.2	486.137	C21H26O13	[M-H]-	4-Hydroxycoumarin di-glucoside	Lignans and Coumarins	Coumarins	-	3	392860	527175	421748	521707	466830	550804	-
MWS2376	143.07	143.07	144.079	C7H12O3	[M-H]-	4-Hydroxycyclohexylcarboxylic acid	Organic acids	Organic acids	3685-26-5	3	19190.7	28800.9	21067.1	21271.9	31659.5	17908.5	C04404
MWS5206	181.05	135.04	182.058	C9H10O4	[M-H]-	4-Hydroxyphenyllactic Acid*	Phenolic acids	Phenolic acids	306-23-0	3	102180	132642	108125	128469	131226	123635	C03672
MA10074217	144.05	115.04	145.053	C9H7NO	[M-H]-	4-Hydroxyquinoline	Alkaloids	Quinoline alkaloids	611-36-9	3	41331.7	55415.5	39760.9	38133	46038	46948.4	C06343
Lmzp007739	316.284	256.265	315.277	C18H37NO3	[M+H]+	4-Hydroxysphingosine	Lipids	Sphingolipids	-	3	128454	113581	138101	148095	94811.6	130293	-
Zmhn002424	285.01	205.05	286.015	C11H10O7S	[M-H]-	4-Methoxy-5-methylcoumarin-7-O-sulfate	Lignans and Coumarins	Coumarins	-	3	123292	85133.8	94326.6	102727	103477	109940	-
pmf0440	163.08	91.05	162.068	C10H10O2	[M+H]+	4-MethoxycinnaMaldehyde	Others	Aldehyde compounds	1963-36-6	3	266213	237968	275400	244478	190990	227082	C10475
MWSHC2035	179.07	119.05	178.063	C10H10O3	[M+H]+	4-Methoxycinnamic acid	Phenolic acids	Phenolic acids	830-09-1	2	436893	514066	437147	461627	529679	603913	-
Wahln09353	197.1	182.07	198.105	C14H14O	[M-H]-	4-Methoxydiphenylmethane	Others	Others	834-14-0	3	1.82687e+06	1.77231e+06	1.53839e+06	1.66751e+06	1.67354e+06	1.69359e+06	-
pmb0764	144.05	113.03	143.041	C6H9NOS	[M+H]+	4-Methyl-5-thiazoleethanol	Others	Others	137-00-8	3	532383	684795	684910	591061	590102	611487	C04294
MWS2099	137.06	77.04	136.052	C8H8O2	[M+H]+	4-Methylbenzoic acid	Phenolic acids	Phenolic acids	99-94-5	3	711485	686003	714552	658728	667250	668912	C01454
Lcfn121126	253.14	209.16	254.152	C14H22O4	[M-H]-	4-Methylene-2-octyl-5-oxotetrahydrofuran-3-carboxylicacid(C75)	Others	Lactones	218137-86-1	1	227551	238462	217156	225793	248752	258459	-
zjgp122317	515.15	177.05	514.148	C26H26O11	[M+H]+	4-O-(2''-O-acetyl-6''-P-coumaroyl-β-D-glucopyranosyl)-P-coumaric acid	Others	Others	-	1	2.75194e+07	2.90187e+07	2.8562e+07	2.77629e+07	2.71966e+07	2.9192e+07	-
Yajn002315	515.14	191.06	516.148	C22H28O14	[M-H]-	4-O-(3'-O-alpha-D-Glucopyranosyl)caffeoylquinic acid	Phenolic acids	Phenolic acids	1401352-63-3	1	1.36332e+07	9.42278e+06	7.77723e+06	1.33686e+07	1.78799e+07	1.96503e+07	-
Wafn002874	515.14	323.08	516.148	C22H28O14	[M-H]-	4-O-(4'-O-alpha-D-Glucopyranosyl)caffeoylquinic acid	Phenolic acids	Phenolic acids	1401352-62-2	1	6.7178e+07	5.88202e+07	4.49836e+07	5.87253e+07	6.36712e+07	6.49114e+07	-
Zmhn003046	477.14	337.09	478.147	C23H26O11	[M-H]-	4-O-(6'-O-Glucosylferuloyl)-3,4-dihydroxybenzyl alcohol	Phenolic acids	Phenolic acids	-	3	130319	145749	144009	90941.3	120569	114280	-
Wacyp06606	467.13	163.04	466.126	C25H22O9	[M+H]+	4-O-Cinnamoyl-5-O-caffeoylshikimic acid	Phenolic acids	Phenolic acids	-	1	153512	177559	148584	159414	161744	132132	-
MWStz488	337.09	173.05	338.1	C16H18O8	[M-H]-	4-O-Coumaroylquinic acid	Phenolic acids	Phenolic acids	53539-37-0	1	1.55171e+06	1.85231e+06	1.86143e+06	1.79039e+06	1.63098e+06	1.671e+06	-
Waymn03248	367.1	193.05	368.111	C17H20O9	[M-H]-	4-O-Feruloylquinic acid	Phenolic acids	Phenolic acids	2613-86-7	1	1.94925e+07	2.20031e+07	1.86532e+07	2.18e+07	2.13255e+07	2.13856e+07	-
Wahln02928	529.16	193.05	530.164	C23H30O14	[M-H]-	4-O-Feruloylquinic acid Glucoside	Phenolic acids	Phenolic acids	-	1	2.04026e+06	2.37645e+06	2.53074e+06	2.10102e+06	2.236e+06	2.08491e+06	-
Waln002594	341.09	163.04	342.095	C15H18O9	[M-H]-	4-O-Galactoyl p-Coumaric acid*	Phenolic acids	Phenolic acids	-	2	141617	163096	179045	169709	165372	171695	-
Zmhn000892	301.09	139.05	302.1	C13H18O8	[M-H]-	4-O-Glucosyl-3,4-dihydroxybenzyl alcohol	Others	Others	-	3	907412	1.02492e+06	979576	970891	1.03822e+06	1.01591e+06	-
Zmhn001358	299.08	137.02	300.084	C13H16O8	[M-H]-	4-O-Glucosyl-4-hydroxybenzoic acid	Phenolic acids	Phenolic acids	-	1	1.83896e+06	2.05695e+06	2.10674e+06	2.01763e+06	1.85919e+06	1.95417e+06	-
Zmhn002227	385.11	223.06	386.121	C17H22O10	[M-H]-	4-O-Glucosyl-sinapate	Phenolic acids	Phenolic acids	-	3	135035	136320	145749	114473	150474	130554	C02919
zjgp122323	355.1	163.04	354.095	C16H18O9	[M+H]+	4-O-acetyl-3-O-caffeoyl-2-C-methyl-D-erythronate	Others	Others	-	3	1.12918e+07	8.91043e+06	8.78298e+06	9.17964e+06	7.77751e+06	1.21321e+07	-
Lcfp121029	325.11	163.06	324.106	C12H20O10	[M+H]+	4-O-beta-L-Galactopyranosyl-3,6-anhydro-L-galactose	Others	Saccharides	-	2	594208	981544	768774	882883	611350	840745	-
Wasn000977	311.1	89.24	312.106	C11H20O10	[M-H]-	4-O-galactopyranosylxylose	Others	Saccharides	14087-31-1	3	23375.9	23785.5	14326.9	15380.7	18687.6	12719.7	-
Hmhn003518	355.104	175.04	356.111	C16H20O9	[M-H]-	4-O-β-D-glucopyranosylferulic acid	Phenolic acids	Phenolic acids	-	3	7.87745e+06	7.95247e+06	7.84588e+06	8.19003e+06	8.23727e+06	8.10578e+06	-
Wcdp006929	291.195	207.138	290.188	C18H26O3	[M+H]+	4-Oxo-9,11,13,15-Octadecatetraenoic Acid	Lipids	Free fatty acids	17699-21-7	3	42042.8	42179.8	39561.4	45900.2	33681.3	33858.4	-
pme2596	184.06	148.04	183.053	C8H9NO4	[M+H]+	4-Pyridoxic acid	Others	Vitamin	82-82-6	3	215943	266578	184279	245935	214514	291379	C00847
pmb0801	346.11	184.06	345.106	C14H19NO9	[M+H]+	4-Pyridoxic acid-O-glucoside	Others	Vitamin	-	1	1.2428e+06	1.46731e+06	1.45029e+06	1.3105e+06	1.27313e+06	1.43391e+06	-
Wccp001401	212.09	194.08	211.084	C10H13NO4	[M+H]+	4-[2-formyl-5-(hydroxymethyl)pyrrol-1-yl]butanoic acid	Alkaloids	Alkaloids	-	2	433223	579010	448415	457541	500787	482426	-
Zbqp002313	203.14	84.04	202.132	C9H18N2O3	[M+H]+	4-amino-5-(butylamino)-5-oxopentanoic acid	Amino acids and derivatives	Amino acids and derivatives	-	1	5.00404e+06	5.90831e+06	5.43831e+06	4.88446e+06	5.60919e+06	5.65927e+06	-
Zaln004057	335.08	179.03	336.084	C16H16O8	[M-H]-	4-caffeoylshikimic acid	Phenolic acids	Phenolic acids	-	1	2.57259e+06	2.82291e+06	2.62104e+06	2.87436e+06	2.68962e+06	2.76289e+06	-
MWSCX017	165.05	119.05	164.047	C9H8O3	[M+H]+	4-hydroxyphenyl acrylaldehyde	Others	Aldehyde compounds	-	1	896877	888863	992222	1.09706e+06	907084	962908	-
MWS4303	119.05	93.03	120.058	C8H8O	[M-H]-	4-hydroxystyrene	Phenolic acids	Phenolic acids	2628-17-3	3	24363.3	25566	21724.9	27744.9	21818.2	23593.8	C05627
Yalp002838	207.07	91.05	206.058	C11H10O4	[M+H]+	4-methoxy-5-hydroxymethylcoumarin	Lignans and Coumarins	Coumarins	-	3	622280	462771	868088	636705	759329	799275	-
MWS1877	205.16	133.06	206.167	C14H22O	[M-H]-	4-tert-Octylphenol	Others	Others	140-66-9	2	9194.12	11748.1	10605.6	10163.1	9163.76	7380.77	C14205
Hmpn003034	403.174	179.07	404.183	C22H28O7	[M-H]-	5''-Methoxyhexahydrocurcumin	Others	Ketone compounds	138870-96-9	3	19394	27595.3	12173.3	17696.9	19091.4	20852.3	-
pme1474	298.1	136.06	297.09	C11H15N5O3S	[M+H]+	5'-Deoxy-5'-(methylthio)adenosine	Nucleotides and derivatives	Nucleotides and derivatives	2457-80-9	3	7.35668e+06	8.17983e+06	7.82721e+06	7.55767e+06	7.53292e+06	7.86923e+06	C00170
MWSmce116	252.1	136.06	251.102	C10H13N5O3	[M+H]+	5'-Deoxyadenosine*	Nucleotides and derivatives	Nucleotides and derivatives	4754-39-6	3	4.83207e+06	5.25323e+06	4.61741e+06	5.23893e+06	5.05329e+06	4.85337e+06	C05198
Lmzn001582	387.17	207.1	388.173	C18H28O9	[M-H]-	5'-Glucosyloxyjasmanic acid	Organic acids	Organic acids	-	2	106768	129249	145783	107967	121517	112657	-
Lmmn002260	551.21	389.17	552.221	C27H36O12	[M-H]-	5'-Methoxyisolariciresinol-9'-O-glucoside	Lignans and Coumarins	Lignans	-	3	369234	621674	544445	655477	410866	541698	-
MWS2602	335.22	115.04	336.23	C20H32O4	[M-H]-	5(S),15(S)-DiHETE; 5,15-Dihydroxy-6,8,11,13-Eicosatetraenoic Acid	Lipids	Free fatty acids	82200-87-1	3	7151.67	7423.29	5377.45	7838.98	8447.89	7372.35	-
Zbn009590	313.07	270.06	314.081	C17H14O6	[M-H]-	5,15-O-Dimethyl morindol	Quinones	Anthraquinone	-	1	10350.6	13856.2	12732.7	9263	12555.7	12348.9	-
Lagp004545	609.15	361.1	608.138	C27H28O16	[M+H]+	5,2',5'-Trihydroxy-3,7,4'-trimethoxyflavone-2'-O-β-D-malonylglucoside*	Flavonoids	Flavonols	-	3	71375.5	97359	79264.3	97852.9	105660	127897	-
mws0038	313.07	283.02	314.079	C17H14O6	[M-H]-	5,4'-Dihydroxy-3,7-dimethoxyflavone(Kumatakenin)	Flavonoids	Flavonols	3301-49-3	3	70642.3	93671.9	81581.9	85029.3	90601.3	85047.3	-
Zbzp007397	181.12	135.12	180.115	C11H16O2	[M+H]+	5,6,7,7a-tetrahydro-4,4,7a-trimethyl-2(4H)-benzofuranone	Others	Others	15356-74-8	1	1.49669e+06	1.62903e+06	1.56683e+06	1.77121e+06	1.62106e+06	1.59796e+06	-
pme0152	129.07	84.04	128.059	C5H8N2O2	[M+H]+	5,6-Dihydro-5-methyluracil	Nucleotides and derivatives	Nucleotides and derivatives	696-04-8	3	615217	769317	668040	505353	583226	538285	C00906
mws0590	147.092	120.081	146.084	C9H10N2	[M+H]+	5,6-Dimethylbenzimidazole	Alkaloids	Alkaloids	582-60-5	3	39732.8	71013.4	56582.3	77454.8	73417.3	63554.5	C03114
MW0014593	335.26	67.05	334.251	C21H34O3	[M+H]+	5,6-EET Methyl Ester	Lipids	Free fatty acids	122799-12-6	3	407134	422389	413884	438807	435847	440168	-
Zmhn003257	299.058	284.039	300.063	C16H12O6	[M-H]-	5,7,2'-Trihydroxy-8-methoxyflavone*	Flavonoids	Flavones	80713-32-2	3	312271	339830	314623	364814	376342	353787	-
MWSHY0047	313.11	269.08	312.1	C18H16O5	[M+H]+	5,7,4'-Trimethoxyflavone	Flavonoids	Flavones	5631-70-9	3	350330	347511	411078	353502	335873	352402	-
MWSmce221	193.05	91.05	192.042	C10H8O4	[M+H]+	5,7-Dihydroxy-4-methylcoumarin	Lignans and Coumarins	Coumarins	2107-76-8	3	202689	256127	181912	190067	239440	170198	-
pmf0367	177.02	89	178.027	C9H6O4	[M-H]-	5,7-Dihydroxychromone	Others	Chromone	31721-94-5	3	55061	57958.8	48619.2	62217.6	48739.4	42534.3	C09001
Lmjp101402	177.02	135.04	178.027	C9H6O4	[M-H]-	5,7-Dihydroxycoumarin	Lignans and Coumarins	Coumarins	2732-18-5	1	196632	249830	195939	204729	236820	217056	-
Lajp006112	609.15	361.1	608.138	C27H28O16	[M+H]+	5,8,3'-trihydroxy-6,7,4'-trimethoxyflavone-8-O-malonylglucoside*	Flavonoids	Flavones	-	3	105770	133719	128657	78021.3	82910.4	114063	-
Lajp005898	523.14	361.1	522.137	C24H26O13	[M+H]+	5,8,3'-trihydroxy-6,7,4'-trimethoxyflavone-8-O-β-D-glucoside*	Flavonoids	Flavones	-	3	9.18482e+06	9.6704e+06	9.53906e+06	8.14619e+06	9.3106e+06	9.34358e+06	-
Wbsp000360	429.34	411.55	428.329	C28H44O3	[M+H]+	5,8-Epidioxyergosta-6,22-dien-3-ol (Ergosterol peroxide)	Steroids	Steroid	2061-64-5	3	138400	135424	143507	162681	152912	154586	-
Hmtn001120	315.11	153.06	316.116	C14H20O8	[M-H]-	5-(2-Hydroxyethyl)-2-O-glucosylphenol	Others	Others	-	3	1.1107e+06	1179169	1.05773e+06	1.07572e+06	1.05343e+06	1.07878e+06	-
Lmbn001467	158.08	116.07	159.089	C7H13NO3	[M-H]-	5-Acetamidopentanoic Acid	Organic acids	Organic acids	1072-10-2	3	108479	155014	126720	126269	140785	121326	C03087
Zjxp110308	297.21	251.2	296.199	C17H28O4	[M+H]+	5-Acetoxy-12-hydroxyfarnesol	Terpenoids	Sesquiterpenoids	-	3	1.97045e+06	2.07332e+06	2.01452e+06	1.96544e+06	1.99453e+06	2.03225e+06	-
Lmqp000329	296.07	104.11	295.057	C8H14N3O7P	[M+H]+	5-Aminoimidazole ribonucleotide	Nucleotides and derivatives	Nucleotides and derivatives	25635-88-5	1	1.67322e+07	1.86033e+07	1.85193e+07	1.68885e+07	1.84336e+07	17856164	C03373
pme0120	118.09	101.06	117.079	C5H11NO2	[M+H]+	5-Aminovaleric acid	Organic acids	Organic acids	660-88-8	3	38866.2	25080.8	39537.9	44779.6	41786.7	27294.1	C00431
Lmmn003663	329.09	167.04	330.095	C14H18O9	[M-H]-	5-Glucosyloxy-2-Hydroxybenzoic acid methyl ester	Phenolic acids	Phenolic acids	-	3	73621.7	75860.4	60466.8	63524.9	57114.3	86539.5	-
Hmpn003185	403.178	179.07	404.183	C22H28O7	[M-H]-	5-Hydroxy-1-(4-hydroxy-3,5-dimethoxyphenyl)-7-(4-hydroxy-3-methoxyphenyl)heptan-3-one	Others	Ketone compounds	-	3	22715.8	12876.7	20639.1	24906.5	20228.1	15364.2	-
MWSmce275	163.072	107.047	162.068	C10H10O2	[M+H]+	5-Hydroxy-1-tetralone	Others	Ketone compounds	28315-93-7	3	6.83752e+06	6.66412e+06	6.86234e+06	7.23265e+06	7.21078e+06	7.26177e+06	-
MWStz073	102.05	84.05	101.048	C4H7NO2	[M+H]+	5-Hydroxy-2-pyrrolidinone	Alkaloids	Pyrrole alkaloids	62312-55-4	3	319268	384035	342115	378672	374162	343471	-
MWSprf117	221.09	130.06	220.085	C11H12N2O3	[M+H]+	5-Hydroxy-DL-tryptophan(5-HTP)	Amino acids and derivatives	Amino acids and derivatives	56-69-9	1	3.72367e+06	4.29145e+06	3.90019e+06	4.00789e+06	4.078e+06	4.23211e+06	C01017
pme1228	221.09	204.07	220.085	C11H12N2O3	[M+H]+	5-Hydroxy-L-tryptophan	Amino acids and derivatives	Amino acids and derivatives	4350-09-8	3	3.64383e+06	4.15448e+06	3.41824e+06	4.05802e+06	3.81e+06	3.95083e+06	C00643
Waymn03223	383.1	209.05	384.106	C17H20O10	[M-H]-	5-Hydroxyferuloylquinic acid	Phenolic acids	Phenolic acids	-	1	4.98683e+06	5.15831e+06	5.57163e+06	4.73025e+06	5.86927e+06	5.0366e+06	-
MWSHY0149	239.07	137.03	238.063	C15H10O3	[M+H]+	5-Hydroxyflavone	Flavonoids	Flavones	491-78-1	3	23713.5	19335.8	11895.4	25456	26162.4	16187.6	-
mws0597	190.05	146.06	191.058	C10H9NO3	[M-H]-	5-Hydroxyindole-3-acetic acid	Alkaloids	Plumerane	54-16-0	3	69439.2	64264.4	42135.9	53710	56248.6	76622.3	C05635
pme2566	217.08	199.07	218.09	C8H14N2O5	[M-H]-	5-L-Glutamyl-L-Alanine	Amino acids and derivatives	Amino acids and derivatives	5875-41-2	3	155682	166501	134618	142164	145530	152395	-
Zmgp005229	297.18	279.22	296.178	C20H24O2	[M+H]+	5-Methoxy-1,7-diphenyl-3-heptanone	Others	Ketone compounds	100667-54-7	3	110068	89734.6	77279.9	75831.8	81461.8	99179.5	-
mws3141	235.11	176.07	234.1	C12H14N2O3	[M+H]+	5-Methoxy-DL-tryptophan	Amino acids and derivatives	Amino acids and derivatives	28052-84-8	3	560949	651494	684280	582278	609841	635184	-
MWSHC20158	127.04	53.04	126.032	C6H6O3	[M+H]+	5-Methoxyfurfural	Others	Aldehyde compounds	21300-07-2	3	147983	172479	158309	140336	140586	118566	-
mws0572	126.07	109.04	125.059	C5H7N3O	[M+H]+	5-Methylcytosine	Nucleotides and derivatives	Nucleotides and derivatives	554-01-8	3	360864	513117	378638	338682	344679	482424	C02376
MWS2072	162.03	132.03	163.038	C7H5N3O2	[M-H]-	5-Nitrobenzimidazole	Alkaloids	Alkaloids	94-52-0	3	93488.6	66936	113796	102326	100182	87698.8	-
Wasyqn1941	515.14	179.04	516.148	C22H28O14	[M-H]-	5-O-(3'-O-Glucosylcaffeoyl)Quinic Acid	Phenolic acids	Phenolic acids	1629852-63-6	1	6.23155e+06	6.27146e+06	5.64106e+06	6.1673e+06	6.39031e+06	7.02741e+06	-
MWSHC20125	335.08	135.05	336.084	C16H16O8	[M-H]-	5-O-Caffeoylshikimic acid	Phenolic acids	Phenolic acids	73263-62-4	1	1.65087e+06	1.95297e+06	1.80098e+06	1.98782e+06	1.92006e+06	1.9679e+06	-
MWStz342	339.11	147.05	338.1	C16H18O8	[M+H]+	5-O-Coumaroylquinic acid	Phenolic acids	Phenolic acids	32451-86-8	2	675673	525784	609922	570401	452393	472587	-
MWStz545	369.12	177.06	368.111	C17H20O9	[M+H]+	5-O-Feruloylquinic acid	Phenolic acids	Phenolic acids	40242-06-6	1	1.59119e+07	1.43432e+07	2.13958e+07	1.30301e+07	1.64829e+07	1.50311e+07	-
Wahln03533	529.16	173.05	530.164	C23H30O14	[M-H]-	5-O-Feruloylquinic acid Glucoside	Phenolic acids	Phenolic acids	-	2	855414	802039	567057	726182	660179	752745	-
Zmhn001703	331.07	169.02	332.074	C13H16O10	[M-H]-	5-O-Galloyl-D-hamamelose*	Phenolic acids	Phenolic acids	-	3	81669.8	63485.4	68453.7	102541	83904.3	67545	-
Waln003168	341.09	195.05	342.095	C15H18O9	[M-H]-	5-O-p-Coumaroyl Galactonic Acid	Phenolic acids	Phenolic acids	-	2	37286.2	62957.7	58370.4	62945.7	50096.5	58700	-
pmb3074	337.09	191.06	338.1	C16H18O8	[M-H]-	5-O-p-Coumaroylquinic acid*	Phenolic acids	Phenolic acids	1899-30-5	1	5.94997e+06	6.37274e+06	6.05164e+06	6.62531e+06	6.40124e+06	6.24437e+06	C12208
pmb3066	481.14	319.2	482.142	C22H26O12	[M-H]-	5-O-p-Coumaroylshikimic acid O-glucoside	Phenolic acids	Phenolic acids	-	3	9.63131e+06	8.57734e+06	9.25851e+06	8.61205e+06	8.62424e+06	8.71732e+06	-
mws0263	128.04	82.03	129.043	C5H7NO3	[M-H]-	5-Oxo-L-Proline*	Amino acids and derivatives	Amino acids and derivatives	98-79-3	3	14365.2	20010.5	17953.7	15295.5	15418.3	18938.3	C01879
MWS0813	128.036	82.0295	129.043	C5H7NO3	[M-H]-	5-Oxoproline*	Amino acids and derivatives	Amino acids and derivatives	149-87-1	3	13077.7	23607.7	11230.5	15985.6	17153.1	17222.2	C02237
Zmmp000969	255.099	123.056	254.09	C11H14N2O5	[M+H]+	5-Ribofuranosylnicotinamide	Nucleotides and derivatives	Nucleotides and derivatives	107325-67-7	3	193339	197036	154314	173709	198903	192357	-
Zmgp002508	361.17	343.15	360.157	C20H24O6	[M+H]+	5-hydroxy-1-(3,4-Dihydroxyphenyl)-7-(4-hydroxy-3-methoxyphenyl)-3-heptanone	Others	Ketone compounds	-	3	780777	910723	842272	676568	812828	868772	-
Zahn007990	197.12	153.13	198.126	C11H18O3	[M-H]-	5-hydroxy-3,4-dimethyl-5-pentylfuran-2(5H)-one	Others	Lactones	-	2	346163	363258	364371	360477	358389	379205	-
MWSCX001	143.033	69.0338	142.027	C6H6O4	[M+H]+	5-hydroxymaltol	Others	Ketone compounds	1073-96-7	3	21931	51011.4	60912.2	63244	41715.9	75050.1	-
Zbqp000949	204.12	85.03	203.116	C9H17NO4	[M+H]+	5-methyl 1-propyl L-glutamate	Amino acids and derivatives	Amino acids and derivatives	-	3	97932.8	47084	64429.8	65832.2	55246.4	89154.8	-
Waptn02053	447.11	152.01	448.122	C18H24O13	[M-H]-	5-{[2-O-(beta-d-apiofuranosyl)-beta-d-glucopyranosyl]oxy}-2-hydroxybenzoic acid*	Phenolic acids	Phenolic acids	-	1	687288	712643	692268	975651	685092	729752	-
Lmbn004685	311.22	223.17	312.23	C18H32O4	[M-H]-	5S,8R-DiHODE; (5S,8R,9Z,12Z)-5,8-Dihydroxyoctadeca-9,12-dienoate	Lipids	Free fatty acids	-	1	3.64406e+06	4.20793e+06	3.81528e+06	4.01623e+06	4.04396e+06	4.13599e+06	C20186
Hmbn002692	517.158	175.04	518.164	C22H30O14	[M-H]-	6'-O-Feruloyl-D-sucrose	Phenolic acids	Phenolic acids	118230-77-6	3	761228	655209	775846	746319	726291	575919	-
pmp001066	595.202	207.065	594.195	C28H34O14	[M+H]+	6'-O-Sinapoylgeniposide	Terpenoids	Monoterpenoids	1012306-66-9	3	174512	208368	189799	165322	160922	205831	-
pmp001064	567.244	369.116	566.236	C28H38O12	[M+H]+	6'-O-Sinapoyljasminoside B	Terpenoids	Monoterpenoids	-	3	105149	113166	61612.1	75758.7	79383.5	58490.5	-
pmp001060	535.217	207.064	534.21	C27H34O11	[M+H]+	6'-O-Sinapoyljasminoside C	Terpenoids	Monoterpenoids	1031738-88-1	3	39588.8	33351.2	23786.9	37305.6	32521.8	35155.7	-
pmp001063	553.228	207.066	552.221	C27H36O12	[M+H]+	6'-O-Sinapoyljasminoside L	Terpenoids	Monoterpenoids	-	3	109890	129903	144546	125603	130116	116612	-
Lmsn003628	547.17	223.06	548.174	C23H32O15	[M-H]-	6'-O-Sinapoylsucrose	Phenolic acids	Phenolic acids	-	3	806342	719318	676135	652139	605585	686318	-
pmp001065	581.19	207.06	580.179	C27H32O14	[M+H]+	6'-O-[(E)-sinapoyl]gardoside*	Terpenoids	Monoterpenoids	-	3	55592.7	59567.6	24776.9	32459.2	45332.5	48522.3	-
MWSHY0159	255.07	137.03	254.058	C15H10O4	[M+H]+	6,2'-Dihydroxyflavone	Flavonoids	Flavones	92439-20-8	3	28243.2	39327.8	31125.6	31293.5	30478.1	26163.5	-
MWSmce159	193.05	147.04	192.042	C10H8O4	[M+H]+	6,7-Dihydroxy-4-methylcoumarin	Lignans and Coumarins	Coumarins	529-84-0	3	133971	138393	177678	149761	180182	179880	-
Zbdn007423	207.07	192.04	208.074	C11H12O4	[M-H]-	6,7-Dimethoxy-4-chromanone	Flavonoids	Other Flavonoids	54013-49-9	1	2.18747e+06	2.2806e+06	2.287e+06	2.2943e+06	2.34468e+06	2.32699e+06	-
Wcfp003475	325.14	191.08	324.132	C15H20N2O6	[M+H]+	6,7-dimethyl-4-(2,3,4,5-tetrahydroxypentyl)-1H-quinoxaline-2,3-dione	Others	Others	-	3	2.38359e+06	2.21864e+06	2.28894e+06	2.08102e+06	2.32175e+06	1.86508e+06	-
Waptp05073	461.14	299.09	460.137	C23H24O10	[M+H]+	6,8-Dimethylapigenin-7-O-glucoside	Flavonoids	Flavones	-	2	164846	183433	168065	211703	181351	107076	-
Layp008369	409.202	177.018	408.194	C25H28O5	[M+H]+	6,8-Diprenylnaringenin; Lonchocarpol A	Flavonoids	Flavanones	68236-11-3	3	62431.4	58198.1	65111.1	73465.5	59694.9	76925.6	C09724
Lmln007483	329.23	171.1	330.241	C18H34O5	[M-H]-	6,9,10-Trihydroxyoctadec-7-enoic acid; Sanleng acid	Lipids	Free fatty acids	-	2	9.22144e+06	1.0608e+07	1.03242e+07	1.01521e+07	1.04812e+07	1.0137e+07	-
Lmqp003432	227.16	121.1	226.157	C13H22O3	[M+H]+	6,9-Dihydroxy-7-megastigmen-3-one	Terpenoids	Sesquiterpenoids	-	3	76125.1	65019.2	64854.5	88481.5	59998.8	59825.8	-
Lcfp067444	549.26	207.14	548.247	C25H40O13	[M+H]+	6,9-dihydroxymegastigmasta-5,7-dien-3-one9-O-beta-D-gentiobioside	Others	Others	-	3	525040	534534	556168	511867	526072	599137	-
Wcgp002561	265.14	119.09	264.136	C15H20O4	[M+H]+	6-(1,2-dihydroxyethyl)-3-hydroxy-2,2,5,7-tetramethyl-3H-inden-1-one	Others	Others	-	3	1.84741e+06	2.00008e+06	1.92284e+06	2.02634e+06	1.93629e+06	1.90481e+06	-
ZbWn001372	211.03	96.96	212.036	C6H12O6S	[M-H]-	6-(sulfooxy)hexanoic acid	Others	Others	-	3	216862	340969	343884	350263	287423	372557	-
MWSslk038	174.112	114.092	173.105	C8H15NO3	[M+H]+	6-Acetamidohexanoic acid	Organic acids	Organic acids	57-08-9	3	41210.8	41076.3	68791.8	70285.2	49287.1	51694.7	-
pme0274	132.1	69.07	131.095	C6H13NO2	[M+H]+	6-Aminocaproic acid	Organic acids	Organic acids	60-32-2	3	2.69823e+06	3.01444e+06	2.28883e+06	4.31928e+06	3.97971e+06	3.31339e+06	C02378
Lmjp003655	463.12	301.08	462.116	C22H22O11	[M+H]+	6-C-MethylKaempferol-3-glucoside*	Flavonoids	Flavonols	-	3	361069	442665	415466	467384	557076	425100	-
MWSslk102	155.01	119.04	154.005	C5H3ClN4	[M+H]+	6-Chloropurine	Nucleotides and derivatives	Nucleotides and derivatives	87-42-3	3	2.78391e+06	2.76473e+06	2.49424e+06	2.55047e+06	2.70067e+06	2.75724e+06	-
Lmdn001560	345.12	165.06	346.126	C15H22O9	[M-H]-	6-DeoxyCatalpol	Terpenoids	Monoterpenoids	99499-99-7	3	16021.9	28057.7	19712.2	22069.1	23414	24463.7	-
pmp001198	132.1	57.03	131.095	C6H13NO2	[M+H]+	6-Deoxyfagomine	Alkaloids	Piperidine alkaloids	197449-09-5	1	412697	341763	316488	743743	670876	557126	-
Yphn012690	407.19	407.19	408.194	C25H28O5	[M-H]-	6-Geranylnaringenin; Mimulone; Bonannione A	Flavonoids	Flavanones	97126-57-3	3	255290	338992	309445	310851	281208	330711	-
Zmyn003693	267.07	252.04	268.074	C16H12O4	[M-H]-	6-Hydroxy-2'-methoxyflavone	Flavonoids	Flavones	61546-59-6	3	17532.8	24718.1	15961.7	21213	21143.6	24302.6	C15203
Lmsn004132	329.094	167.04	330.11	C18H18O6	[M-H]-	6-Hydroxy-4',5,7-trimethoxyflavanone; Hamiltone A	Flavonoids	Flavanones	6626-61-5	3	69441.7	43012.1	49783.4	51214.7	55085.4	82847.6	-
pme3140	175.04	147.05	176.047	C10H8O3	[M-H]-	6-Hydroxy-4-methylcoumarin	Lignans and Coumarins	Coumarins	2373-31-1	3	32742.1	93722.1	46801.9	81638.1	73700.1	88103.7	-
pmb2673	210.04	135.04	211.048	C9H9NO5	[M-H]-	6-Hydroxydopaquinone	Amino acids and derivatives	Amino acids and derivatives	135791-48-9	3	219525	264129	233658	242369	240889	223201	-
pmp001309	465.1	303.05	464.096	C21H20O12	[M+H]+	6-Hydroxykaempferol-7-O-glucoside	Flavonoids	Flavonols	-	3	146230	50122.6	152374	91944.3	116071	85023.7	-
Hmcn002875	301.04	255.02	302.043	C15H10O7	[M-H]-	6-Hydroxyluteolin	Flavonoids	Flavones	18003-33-3	3	16735.3	18629	10605.7	13480.9	15780.5	17633.6	C10072
pme1137	140.03	94.03	139.027	C6H5NO3	[M+H]+	6-Hydroxynicotinic acid	Alkaloids	Pyridine alkaloids	5006-66-6	3	304815	326763	328753	260572	259641	245710	C01020
Waptp02740	177.05	89.04	176.047	C10H8O3	[M+H]+	6-Methoxycoumarin*	Lignans and Coumarins	Coumarins	-	1	203549	290776	284508	249842	240896	258719	-
pmc0274	167.04	125	166.031	C6H6N4S	[M+H]+	6-Methylmercaptopurine	Nucleotides and derivatives	Nucleotides and derivatives	50-66-8	3	146622	116771	126455	121501	143209	128654	C16614
MWS2032	137.07	65.04	136.064	C7H8N2O	[M+H]+	6-Methylnicotinamide	Alkaloids	Pyridine alkaloids	6960-22-1	3	347457	316814	521432	249407	365865	306101	-
Zmhn002334	355.1	193.05	356.111	C16H20O9	[M-H]-	6-O-Feruloyl-β-D-glucose	Phenolic acids	Phenolic acids	137887-25-3	3	3.50147e+06	3.32496e+06	3.69236e+06	3.57402e+06	4.31781e+06	4.15839e+06	-
Lmfn000604	331.07	169.01	332.074	C13H16O10	[M-H]-	6-O-Galloyl-β-D-glucose*	Phenolic acids	Phenolic acids	13186-19-1	3	92120.4	80153.2	63359.5	70472.6	93776	74330.5	-
Wasn000495	311.1	89.02	312.106	C11H20O10	[M-H]-	6-O-alpha-L-arabinopyranosyl-D-glucopyranose	Others	Saccharides	14116-69-9	3	33067.7	21816.9	29892.6	29217.5	30872.5	27811.7	C01625
MWS4525	166.07	124.05	165.065	C6H7N5O	[M+H]+	6-O-methylguanine	Nucleotides and derivatives	Nucleotides and derivatives	20535-83-5	3	542113	734296	610532	629470	602637	683662	-
Lmfn003035	325.09	145.03	326.1	C15H18O8	[M-H]-	6-O-p-Coumaroyl-β-D-glucose	Phenolic acids	Phenolic acids	114297-65-3	1	3.15536e+06	3.55392e+06	4.10718e+06	3.70447e+06	3.58298e+06	3.5744e+06	-
Lhjp111604	581.18	207.06	580.179	C27H32O14	[M+H]+	6-[(4-Hydroxy-3-methoxy-cis-cinnamoyl)oxy]scandoside methyl ester*	Terpenoids	Monoterpenoids	-	3	43992.3	45048.4	40974.9	44484.9	33743	46530.2	-
zjgp122320	163.04	89.04	162.032	C9H6O3	[M+H]+	6-hydroxycoumarin	Lignans and Coumarins	Coumarins	6093-68-1	1	357065	365558	367984	376056	370988	372813	-
ZbWn003669	225.04	79.96	226.051	C7H14O6S	[M-H]-	6-methoxyhexanoic sulfuric anhydride	Others	Others	-	3	60497.2	95379	74626.9	80190.2	72857.1	87230.7	-
MWSslk135	193.05	147.05	192.042	C10H8O4	[M+H]+	7,8-Dihydroxy-4-methylcoumarin	Lignans and Coumarins	Coumarins	2107-77-9	3	29036.5	72028.4	75014.7	74076.3	84479.1	60294.7	-
MWSslk183	255.07	181.07	254.058	C15H10O4	[M+H]+	7,8-Dihydroxy-4-phenylcoumarin	Lignans and Coumarins	Coumarins	842-01-3	3	157568	180067	154865	204449	178019	170734	C16451
Zbsp005900	223.06	162.03	222.053	C11H10O5	[M+H]+	7,8-Dimethoxy-6-hydroxycoumarin	Lignans and Coumarins	Coumarins	-	1	84947.3	78741.2	90425.4	76950.2	101196	87932.9	-
Wasyqn1528	371.1	135.05	372.106	C16H20O10	[M-H]-	7-Caffeoylsedoheptulose	Phenolic acids	Phenolic acids	-	1	1.0708e+07	1.13239e+07	1.1954e+07	1.25273e+07	1.2433e+07	1.926e+07	-
Hmmn003964	359.13	197.08	360.142	C16H24O9	[M-H]-	7-Deoxyloganic acid	Terpenoids	Monoterpenoids	22487-36-1	3	366042	387946	456413	380795	389494	405232	C11636
MWSHY0141	163.04	107.05	162.032	C9H6O3	[M+H]+	7-Hydroxy-4-chromone	Others	Chromone	59887-89-7	3	478333	466900	650758	811844	711022	878528	-
MWSslk194	222.04	148.05	221.032	C10H7NO5	[M+H]+	7-Hydroxy-4-methyl-8-nitrocoumarin	Lignans and Coumarins	Coumarins	19037-69-5	3	1.0062e+06	1.04727e+06	1.03742e+06	1.0145e+06	1.12648e+06	1.02096e+06	-
MWSmce255	175.04	133.03	176.047	C10H8O3	[M-H]-	7-Hydroxy-4-methylcoumarin	Lignans and Coumarins	Coumarins	90-33-5	2	50442.3	36383.5	23068.1	31488	37774.6	28580.9	C03081
Waptp03206	195.06	117.03	194.057	C10H10O4	[M+H]+	7-Hydroxy-8-Methoxychromanon	Lignans and Coumarins	Coumarins	-	3	978465	1.00927e+06	1.04621e+06	1.07709e+06	893970	940958	-
pmb2601	307.082	161.024	308.09	C15H16O7	[M-H]-	7-Hydroxycoumarin-O-rhamnoside	Lignans and Coumarins	Coumarins	-	3	393348	274379	289168	380935	396575	436277	-
Hmqn002118	161.02	133.03	162.032	C9H6O3	[M-H]-	7-Hydroxycoumarin;Umbelliferone	Lignans and Coumarins	Coumarins	93-35-6	2	4.24066e+07	4.08751e+07	4.18705e+07	4.27991e+07	4.07901e+07	4.07291e+07	C09315
Walbp04045	193.08	105.07	192.078	C11H12O3	[M+H]+	7-Methoxy-6-methyldihydrocoumarin	Lignans and Coumarins	Coumarins	-	3	71696.8	197646	106546	144045	128541	148575	-
mws1075	177.05	121.06	176.047	C10H8O3	[M+H]+	7-Methoxycoumarin	Lignans and Coumarins	Coumarins	531-59-9	3	537639	678693	686165	622968	680633	609128	C09268
pme3968	166.07	149.05	165.065	C6H7N5O	[M+H]+	7-Methylguanine	Nucleotides and derivatives	Nucleotides and derivatives	578-76-7	3	22040.4	16793.2	22172.9	21373.8	30797.2	19256	C02242
pme2801	167.06	150.03	166.049	C6H6N4O2	[M+H]+	7-Methylxanthine	Nucleotides and derivatives	Nucleotides and derivatives	552-62-5	1	147162	169335	156516	159305	183277	117229	C16353
Wacn007617	551.097	519.069	552.106	C31H20O10	[M-H]-	7-O-Methylamentoflavone	Flavonoids	Biflavones	-	3	17692.9	14358.9	17632.5	16058.6	15107.9	23223	-
Wadp009200	299.2	147.08	298.193	C20H26O2	[M+H]+	7-Oxo-pimara-1,8a,11,15-Tetraen-19-ol*	Terpenoids	Ditepenoids	-	3	1.6553e+06	1.58164e+06	1.63551e+06	1.66038e+06	1.49811e+06	1.63141e+06	-
Wadp008811	299.2	147.08	298.193	C20H26O2	[M+H]+	7-Oxo-pimara-5,8,11,15-Tetraen-19-ol*	Terpenoids	Ditepenoids	-	3	1.61021e+06	1.73272e+06	1.53839e+06	1.59013e+06	1.65757e+06	1.83649e+06	-
MWStz562	315.2	187.12	314.188	C20H26O3	[M+H]+	7-Oxodehydroabietic acid*	Terpenoids	Ditepenoids	18684-55-4	3	1.83835e+06	1.87542e+06	1.89985e+06	1.97908e+06	1.96778e+06	1.91675e+06	-
Zbln003676	385.13	205.05	386.137	C21H22O7	[M-H]-	7-hydroxy-4-methoxyphenanthrene-2-O-glucoside	Quinones	PhenAnthraquinones	-	3	2.53646e+06	2.26979e+06	2.67178e+06	1.99427e+06	2.44386e+06	2.447e+06	-
Ymjm000134	507.185	331.066	508.195	C25H32O11	[M-H]-	7R-Dihydrodehydrodiconiferyl alcohol 4-O-β-D-glucopyranoside	Lignans and Coumarins	Lignans	-	3	56748.2	53884	55936.1	46249.7	54793.9	55195.5	-
Lmbn005287	311.22	249.22	312.23	C18H32O4	[M-H]-	7S,8S-DiHODE; (9Z,12Z)-(7S,8S)-Dihydroxyoctadeca-9,12-dienoic acid*	Lipids	Free fatty acids	143288-65-7	2	912894	999961	898476	1.00459e+06	994439	939282	C07354
Lmmn006246	337.23	157.12	338.246	C20H34O4	[M-H]-	7β-Hydroxydarutigenol	Terpenoids	Ditepenoids	1188281-99-3	3	1.30049e+06	1.36837e+06	391185	657126	649292	673070	-
MW0103271	305.25	163.14	304.24	C20H32O2	[M+H]+	8,11,14,17-Eicosatetraenoic acid	Lipids	Free fatty acids	2091-26-1	3	92589.4	99100.9	87147.8	98214.7	98998.4	87368.3	-
Wcsn010524	265.22	265.22	266.225	C17H30O2	[M-H]-	8,11-Heptadecadienoic acid	Lipids	Free fatty acids	-	2	862415	892244	844884	820266	784348	790353	-
pmb2636	335.22	253.18	336.23	C20H32O4	[M-H]-	8,15-Dihydroxy-5,9,11,13-eicosatetraenoic acid	Lipids	Free fatty acids	77667-08-4	3	147425	177457	179069	144867	156303	149874	-
MWS20018	335.22	127.08	336.23	C20H32O4	[M-H]-	8,9-Dihydroxy-5,11,14,17-eicosatetraenoic acid	Lipids	Free fatty acids	867350-87-6	3	32547.8	35782.4	33444.4	28623.1	27621.5	31744.5	-
MWS2984	153.05	136.03	152.045	C4H4N6O	[M+H]+	8-Azaguanine	Nucleotides and derivatives	Nucleotides and derivatives	134-58-7	3	3.52186e+06	3.03136e+06	3.8642e+06	2.24793e+06	3.83531e+06	3.05161e+06	-
MWStz655	359.13	135.09	360.142	C16H24O9	[M-H]-	8-Epideoxyloganic acid	Terpenoids	Monoterpenoids	88668-99-9	3	616546	677837	842652	653989	695922	855783	C11649
Lmhp001909	405.139	211.058	404.132	C17H24O11	[M+H]+	8-Epikingiside	Terpenoids	Monoterpenoids	-	3	81241.2	107194	94026.2	73337.7	92080	158175	-
Lmxn003152	389.14	167.07	390.153	C17H26O10	[M-H]-	8-Epiloganin	Terpenoids	Terpene	79172-04-6	3	31187.5	31292.3	33381.2	40993.7	41574.9	33137.7	-
Lmxp004495	163.04	89.04	162.032	C9H6O3	[M+H]+	8-Hydroxycoumarin	Lignans and Coumarins	Coumarins	2442-31-1	1	39554.6	23633.1	16245.5	24608.1	39766.9	43414.4	-
Waptp03029	177.05	89.04	176.047	C10H8O3	[M+H]+	8-Methoxycoumarin*	Lignans and Coumarins	Coumarins	-	1	2.24157e+06	2.28713e+06	2.02986e+06	2.34962e+06	2.22047e+06	2.14309e+06	-
Wcjp002598	146.06	91.05	145.053	C9H7NO	[M+H]+	8-hydroxyquinoline	Alkaloids	Quinoline alkaloids	148-24-3	1	2.66636e+07	2.70791e+07	26002965	2.53222e+07	2.58889e+07	2.70177e+07	C19434
Lmbn005662	295.23	171.1	296.235	C18H32O3	[M-H]-	9(10)-EpOME;(9R,10S)-(12Z)-9,10-Epoxyoctadecenoic acid	Lipids	Free fatty acids	16833-56-0	2	2.31805e+07	2.29334e+07	2.17952e+07	2.29636e+07	2.22628e+07	2.28181e+07	C14825
Hmqn003054	329.23	311.22	330.241	C18H34O5	[M-H]-	9,10,11-Trihydroxy-12-octadecenoic acid	Lipids	Free fatty acids	61911-67-9	2	491625	514403	530810	504635	523060	547280	-
pmn001694	329.23	229.15	330.241	C18H34O5	[M-H]-	9,10,13-Trihydroxy-11-Octadecenoic Acid	Lipids	Free fatty acids	29907-57-1	1	5.17612e+06	6.46234e+06	5.70703e+06	5.53232e+06	5.65328e+06	5.90623e+06	C14835
Lmyn007622	331.25	157.12	332.256	C18H36O5	[M-H]-	9,10,18-Trihydroxystearic acid	Lipids	Free fatty acids	496-86-6	1	12805.9	15277.2	14427.2	12435.3	11987.7	16117.6	C19621
MWSmce347	209.06	152.06	208.052	C14H8O2	[M+H]+	9,10-Anthraquinone	Quinones	Anthraquinone	84-65-1	2	474206	757104	655049	639680	712642	662797	C16207
Lmbn004240	329.23	199.13	330.241	C18H34O5	[M-H]-	9,10-Dihydroxy-12,13-epoxyoctadecanoic acid	Lipids	Free fatty acids	-	1	592202	646392	619845	625339	629352	691840	C14837
Wcdp010180	261.22	121.1	260.214	C18H28O	[M+H]+	9,11,13,15-Octadecatetraenal	Others	Aldehyde compounds	148408-16-6	2	242604	231049	256232	305462	238709	252019	-
Lmbn003970	329.23	211.14	330.241	C18H34O5	[M-H]-	9,12,13-TriHOME; 9(S),12(S),13(S)-Trihydroxy-10(E)-octadecenoic acid	Lipids	Free fatty acids	97134-11-7	2	7.77426e+06	9.06494e+06	8.548e+06	8.56111e+06	8.75213e+06	8.59832e+06	C14833
pmn001691	327.22	291.2	328.225	C18H32O5	[M-H]-	9,12,13-Trihydroxy-10,15-octadecadienoic acid	Lipids	Free fatty acids	-	1	131655	141956	144667	125259	141674	144387	-
MW0168670	277.22	93.07	276.209	C18H28O2	[M+H]+	9,12-Octadecadiynoic Acid	Lipids	Free fatty acids	2012-14-8	3	9.93159e+06	9.95207e+06	9.36794e+06	1.03524e+07	1.00902e+07	9.91764e+06	-
Lmyn007883	287.22	287.22	288.23	C16H32O4	[M-H]-	9,16-Dihydroxypalmitic acid	Lipids	Free fatty acids	38076-49-2	2	1.24784e+06	1.52607e+06	1.37439e+06	1.43763e+06	1.37328e+06	1.39101e+06	-
mws1060	267.07	135.03	268.081	C10H12N4O5	[M-H]-	9-(Arabinosyl)hypoxanthine	Nucleotides and derivatives	Nucleotides and derivatives	7013-16-3	2	818862	968361	809403	918525	922754	872568	-
Wcjp001256	268.1	136.06	267.097	C10H13N5O4	[M+H]+	9-Alpha-Ribofuranosyladenine*	Nucleotides and derivatives	Nucleotides and derivatives	-	1	4.30459e+06	5.01311e+06	4.8339e+06	5.22926e+06	4.95701e+06	4.6224e+06	-
Zmsp001773	268.11	136.07	267.097	C10H13N5O4	[M+H]+	9-Arabinosyladenine*	Nucleotides and derivatives	Nucleotides and derivatives	-	1	5.24228e+06	5.91955e+06	5.21101e+06	5.25057e+06	5.61083e+06	5.39778e+06	-
MWS1939	181.065	152.062	180.058	C13H8O	[M+H]+	9-Fluorenone	Others	Ketone compounds	486-25-9	3	31775.8	48721.9	37747.8	52926.8	36358	36011.5	C06712
pmb2791	309.21	209.05	310.214	C18H30O4	[M-H]-	9-Hydroperoxy-10E,12,15Z-octadecatrienoic acid	Lipids	Free fatty acids	111004-08-1	3	703950	829384	736093	751680	772990	795765	C16321
MWS80006	311.22	293.21	312.23	C18H32O4	[M-H]-	9-Hydroperoxy-9Z,11E-Octadecadienoic Acid	Lipids	Free fatty acids	-	2	377936	378656	395478	384656	420964	369448	-
pmb2786	293.21	235.17	294.219	C18H30O3	[M-H]-	9-Hydroxy-10,12,15-octadecatrienoic acid*	Lipids	Free fatty acids	89886-42-0	2	6.65059e+06	6.61901e+06	6.19899e+06	6.14685e+06	6.69208e+06	6.27935e+06	C16326
Zmyn004449	309.21	171.1	310.214	C18H30O4	[M-H]-	9-Hydroxy-12-oxo-10(E),15(Z)-octadecadienoic acid	Lipids	Free fatty acids	-	2	1.61458e+06	1.61374e+06	1.58362e+06	1.64936e+06	1.63469e+06	1.59215e+06	C21923
pmn001689	311.22	223.17	312.23	C18H32O4	[M-H]-	9-Hydroxy-12-oxo-15(Z)-octadecenoic acid*	Lipids	Free fatty acids	-	1	3.59766e+06	3.92058e+06	3.94634e+06	3.94498e+06	3.96541e+06	3.88374e+06	C21924
Rfmb087	311.22	293.21	312.23	C18H32O4	[M-H]-	9-Hydroxy-13-oxo-10-octadecenoic Acid	Lipids	Free fatty acids	-	3	488097	559771	483175	563438	531840	524221	-
zjbp111605	235.17	133.1	234.162	C15H22O2	[M+H]+	9-Hydroxyselina-3,11-dien-12-al	Terpenoids	Sesquiterpenoids	-	3	56700.4	89953.3	93136.9	98000.5	101022	114343	-
Wcdp007645	295.23	151.11	294.219	C18H30O3	[M+H]+	9-Oxo-10,12-Octadecadienoic Acid	Lipids	Free fatty acids	54665-32-6	2	1.6019e+06	1.56287e+06	1.70964e+06	1.52273e+06	1.4016e+06	1.85829e+06	-
pmb2787	293.21	275.2	294.219	C18H30O3	[M-H]-	9-Oxo-10E,12Z-octadecadienoic acid	Lipids	Free fatty acids	54232-59-6	3	5.2423e+06	5.30951e+06	5.17615e+06	5.17335e+06	5.20475e+06	4.875e+06	C14766
Hmqp005411	297.24	81.07	296.235	C18H32O3	[M+H]+	9-Oxo-12Z-Octadecenoic acid*	Lipids	Free fatty acids	112543-32-5	1	2.47256e+07	2.34478e+07	2.68365e+07	2.68662e+07	2.46818e+07	2.5222e+07	-
Lmbn003524	171.1	99.08	172.11	C9H16O3	[M-H]-	9-Oxononanoic acid	Lipids	Free fatty acids	2553-17-5	2	60036.2	68776.2	63821.8	58265.1	64498.7	62335.7	C16322
Wcdp007789	295.23	81.07	294.219	C18H30O3	[M+H]+	9-Oxooctadeca-10,12-Dienoic Acid	Lipids	Free fatty acids	-	1	215752	299388	198251	219351	235720	207136	-
Lsj214142	285.076	239.07	284.068	C16H12O5	[M+H]+	9-hydroxy-2,3-dimethoxy-1,4-anthraquinone	Quinones	Anthraquinone	184652-26-4	3	607921	673445	760431	643605	695208	732259	-
zjbp111624	265.18	194.09	264.173	C16H24O3	[M+H]+	9-hydroxyeudesma-3,11(13)-dien-12-methyl ester	Terpenoids	Sesquiterpenoids	-	3	275104	282737	278356	281051	302582	296330	-
MW0015391	297.24	240.1	296.235	C18H32O3	[M+H]+	9R-hydroxy-10E,12Z-octadecadienoic acid	Lipids	Free fatty acids	10075-11-3	3	98556	92909.5	111425	93670.3	101033	98764.9	-
Zmjn004133	311.22	293.21	312.23	C18H32O4	[M-H]-	9S-Hydroperoxy-10E,12Z-octadecadienoic acid	Lipids	Free fatty acids	5502-91-0	3	867015	958220	854642	937884	969017	927475	C14827
Rfmb091	295.23	195.14	296.235	C18H32O3	[M-H]-	9S-Hydroxy-10E,12Z-octadecadienoic acid*	Lipids	Free fatty acids	15514-85-9	1	1.68506e+06	1.77358e+06	1.73023e+06	1.69772e+06	1.73463e+06	1.6642e+06	C14767
Wmkp003574	279.17	149.02	278.163	C15H22N2O3	[M+H]+	9α-Hydroxyoxysophocarpine	Alkaloids	Quinorisidine alkaloids	-	1	356186	311261	283805	289107	247696	289082	-
Lmtn004049	263.13	204.12	264.136	C15H20O4	[M-H]-	Abscisic acid	Terpenoids	Sesquiterpenoids	21293-29-8	3	50653.2	50798.2	56799.3	53483.2	49736.2	50295.2	C06082
mws0051	285.08	242.05	284.068	C16H12O5	[M+H]+	Acacetin	Flavonoids	Flavones	480-44-4	3	135559	148957	154836	164133	138745	157953	C01470
pmp001288	593.19	285.08	592.179	C28H32O14	[M+H]+	Acacetin-7-O-rutinoside (Linarin)	Flavonoids	Flavones	480-36-4	3	75765.5	92353.9	79012.9	96526.6	80322.4	88266.1	-
Wagp003518	338.12	176.07	337.116	C16H19NO7	[M+H]+	Acetoxyindole N-Glucoside	Alkaloids	Plumerane	-	2	56161.6	60623.8	82975.7	74345.4	51522.9	64559.4	-
Lhjp111609	507.125	147.043	506.109	C20H26O13S	[M+H]+	Acetoxypaederoside	Terpenoids	Monoterpenoids	-	3	1.61034e+06	1.80143e+06	1.58447e+06	1.52982e+06	1.57855e+06	1.50904e+06	-
Lhjp111610	457.134	147.045	456.127	C20H24O12	[M+H]+	Acetylasperuloside	Terpenoids	Monoterpenoids	-	3	53274.6	52447		56834.1	54290.8	54267.5	-
Lhjp111608	489.104	147.043	488.099	C20H24O12S	[M+H]+	Acetylpaederoside	Terpenoids	Monoterpenoids	-	3	61340.1	19553.3	20129.1	18307.7	39467.7	23503.8	-
Smcn001947	623.2	161.03	624.205	C29H36O15	[M-H]-	Acteoside; Verbascoside	Phenolic acids	Phenolic acids	61276-17-3	3	35101.8	20659.1	28807.7	26549.4	24251.4	34151.2	C10501
MWSHC2054	136.06	119.04	135.054	C5H5N5	[M+H]+	Adenine	Nucleotides and derivatives	Nucleotides and derivatives	73-24-5	1	1.41053e+07	1.26138e+07	1.44912e+07	1.3478e+07	1.49127e+07	1.31683e+07	C00147
pmb0981	348.07	136.06	347.063	C10H14N5O7P	[M+H]+	Adenosine 5'-monophosphate	Nucleotides and derivatives	Nucleotides and derivatives	61-19-8	3	487258	351824	359426	321899	359694	362069	C00020
pme0230	268.1	136.06	267.097	C10H13N5O4	[M+H]+	Adenosine*	Nucleotides and derivatives	Nucleotides and derivatives	58-61-7	1	4.59322e+06	4.89575e+06	4.71428e+06	5.54652e+06	4.54543e+06	5.06337e+06	C00212
mws0208	145.051	101.061	146.058	C6H10O4	[M-H]-	Adipic Acid*	Organic acids	Organic acids	124-04-9	3	87205.9	118251	97376.8	79916.5	97027.5	115447	C06104
Lmhp003359	401.206	144.078	400.2	C22H28N2O5	[M+H]+	Adirubine	Alkaloids	Alkaloids	38474-14-5	3	1.55848e+06	1.39903e+06	1.44516e+06	1.42889e+06	1.60514e+06	1.34928e+06	-
MWStz178	353.186	144.089	352.179	C21H24N2O3	[M+H]+	Ajmalicine;Tetrahydrosepentine;δ-Yohimbine	Alkaloids	Plumerane	483-04-5	3	65802.1	52750.9	48850.6	50138.4	66349.6	55355	C09024
pme0128	159.077	88.0405	160.085	C6H12N2O3	[M-H]-	Ala-Ala	Amino acids and derivatives	Amino acids and derivatives	1948-31-8	3	12879	21401.7		17247	12504	14225.1	-
MWS201476	227.11	110.07	226.107	C9H14N4O3	[M+H]+	Ala-His	Amino acids and derivatives	Amino acids and derivatives	3253-17-6	3	24907.7	17429.9	20791.5	25392.8	30884.8	31566.8	-
MW0105468	203.14	86.1	202.132	C9H18N2O3	[M+H]+	Ala-Ile	Amino acids and derivatives	Amino acids and derivatives	29727-65-9	3	381986	334136	411539	229887	444053	400515	-
Lcsp001369	318.17	157.13	317.159	C13H23N3O6	[M+H]+	Ala-Ile-Asp	Amino acids and derivatives	Amino acids and derivatives	-	3	160429	187726	204074	192409	319810	135977	-
Lcsp003132	316.22	157.13	315.216	C15H29N3O4	[M+H]+	Ala-Ile-Leu	Amino acids and derivatives	Amino acids and derivatives	-	1	385919	412799	376417	323682	363889	431576	-
MW0144630	318.17	163.04	317.159	C13H23N3O6	[M+H]+	Ala-Leu-Asp	Amino acids and derivatives	Amino acids and derivatives	-	3	2.11316e+06	2.31718e+06	2.2044e+06	2.20084e+06	2.13095e+06	2.37943e+06	-
Lcsp001437	332.18	86.1	331.174	C14H25N3O6	[M+H]+	Ala-Leu-Glu	Amino acids and derivatives	Amino acids and derivatives	-	3	920601	972723	932059	1.03114e+06	950921	970494	-
MW0144670	317.22	129.1	316.211	C14H28N4O4	[M+H]+	Ala-Lys-Val	Amino acids and derivatives	Amino acids and derivatives	-	3	72889.1	106973	99657.3	97839.9	95394	56682.5	-
MWS201426	221.1	133.03	220.088	C8H16N2O3S	[M+H]+	Ala-Met	Amino acids and derivatives	Amino acids and derivatives	14486-05-6	3	579613	641915	538151	806457	623335	712493	-
MW0105477	393.22	309.18	392.217	C18H28N6O4	[M+H]+	Ala-Phe-Arg	Amino acids and derivatives	Amino acids and derivatives	-	3	1.27878e+07	1.56058e+07	1.44125e+07	1.42558e+07	1.3918e+07	1.40122e+07	-
MW0144779	366.2	177.05	365.195	C18H27N3O5	[M+H]+	Ala-Tyr-Leu	Amino acids and derivatives	Amino acids and derivatives	-	3	469416	668115	543588	426546	474609	670203	-
Lcsp000520	187.11	70.07	186.1	C8H14N2O3	[M+H]+	Alanylproline	Amino acids and derivatives	Amino acids and derivatives	13485-59-1	3	446831	491991	499176	518687	457870	513191	-
Ymjm000064	331.19	313.18	332.199	C20H28O4	[M-H]-	Aldovibsanin C	Terpenoids	Ditepenoids	-	3	45651	51300.6	51721.2	48102.5	48428.9	40925.1	-
MWS0205	157.037	97.0027	158.044	C4H6N4O3	[M-H]-	Allantoin	Organic acids	Organic acids	97-59-6	3	41895.7	57486	44647.1	54068.9	58538.2	42431.2	C01551
MWSslk235	181.07	59.01	182.079	C6H14O6	[M-H]-	Allitol	Others	Saccharides	488-44-8	1	454728	511916	414981	377283	406043	600530	-
pme1173	137.05	110.03	136.038	C5H4N4O	[M+H]+	Allopurinol	Nucleotides and derivatives	Nucleotides and derivatives	315-30-0	3	453700	525885	457551	431968	506547	475507	-
Zmdn006929	255.07	213.06	256.074	C15H12O4	[M-H]-	Aloe-Emodin-9-Anthrone	Quinones	Anthraquinone	6247-99-0	3	117098	121711	106214	113355	110821	117264	C16760
Zmdn003144	393.12	231.066	394.126	C19H22O9	[M-H]-	Aloesone-7-O-β-D-glucoside	Phenolic acids	Phenolic acids	-	3	15388.6	16846.2	11329.7	24815	20877.1	15425.3	-
pme3096	118.01	74.02	119.022	C3H5NO4	[M-H]-	Aminomalonic acid	Amino acids and derivatives	Amino acids and derivatives	1068-84-4	3	113962	147072	141408	128376	126541	131645	C00872
Cmcp003939	279.19	149.02	278.178	C19H22N2	[M+H]+	Ammocalline	Alkaloids	Plumerane	-	3	318386	250721	267954	318761	366367	340673	-
Lmwp003442	449.11	287.06	448.101	C21H20O11	[M+H]+	Amoenin	Flavonoids	Flavonols	-	3	3.37596e+06	3.95538e+06	3.96542e+06	4.11079e+06	3.89615e+06	4.01031e+06	-
Lmyp003934	349.27	123.08	348.266	C22H36O3	[M+H]+	Anacardic acid	Phenolic acids	Phenolic acids	16611-84-0	3	666192	775307	672735	737057	769075	756267	C10759
Qmgp102504	332.133	152.07	331.132	C20H17N3O2	[M+H]+	Angustoline	Alkaloids	Plumerane	40041-95-0	3	375429	422688	405515	304351	459999	357225	-
MWS3105	94.07	51.03	93.0578	C6H7N	[M+H]+	Aniline	Alkaloids	Alkaloids	62-53-3	3	19142.2	14660.8	15783.1	16413.9	10701.3	20740	C00292
Zbn009444	269.046	254.02	270.054	C15H10O5	[M-H]-	Anthragallol 2-Methyl Ether; 1,3-Dihydroxy-2-methoxyanthraquinone	Quinones	Anthraquinone	10383-63-8	3	21503.2	30117.4	24550.9	31536.5	30609.7	29988.2	-
pmb2654	460.15	117.9	461.153	C19H27NO12	[M-H]-	Anthranilate-1-O-Sophoroside	Phenolic acids	Phenolic acids	-	3	1.96552e+06	1.77883e+06	1.49509e+06	1.14767e+06	1.49768e+06	1.4757e+06	-
MWS20148	433.113	271.074	432.106	C21H20O10	[M+H]+	Apigenin-4'-O-glucoside*	Flavonoids	Flavones	20486-34-4	3	56909.9	167830	110329	73394.3	108978	66430.5	-
MWSHY0189	433.11	271.07	432.106	C21H20O10	[M+H]+	Apigenin-7-O-glucoside(Cosmosiin)*	Flavonoids	Flavones	578-74-5	3	104296	147724	103938	64199.1	90646.2	101001	C04608
Lhkp101525	457.13	163.04	456.127	C20H24O12	[M+H]+	Apiosylskimmin (Adicardin)	Lignans and Coumarins	Coumarins	103529-94-8	3	1.07757e+06	1.23934e+06	1.23268e+06	1.1264e+06	1.18356e+06	1.10598e+06	-
Lhjp111634	547.163	175.038	546.159	C23H30O15	[M+H]+	Arabinosylasperuloside	Terpenoids	Monoterpenoids	-	3	38576.4	31601.3	23491.1	33927.4	21604.5	26491.6	-
pmf0397	311.3	311.3	312.303	C20H40O2	[M-H]-	Arachidic acid	Lipids	Free fatty acids	506-30-9	3	4.00724e+06	5.55283e+06	4.35299e+06	4.81715e+06	4.12685e+06	4.26933e+06	C06425
mws0369	303.23	259.24	304.24	C20H32O2	[M-H]-	Arachidonic Acid	Lipids	Free fatty acids	506-32-1	3	11280	14299	13249.7	15953.7	21240.8	19021.6	C00219
MWSmce675	271.08	108.02	272.09	C12H16O7	[M-H]-	Arbutin	Others	Others	497-76-7	1	1.27173e+06	1.55577e+06	1.33838e+06	1.30151e+06	1.4624e+06	1.36574e+06	C06186
mws0092	533.203	371.146	534.21	C27H34O11	[M-H]-	Arctiin	Lignans and Coumarins	Lignans	20362-31-6	3	1.42473e+06	1.7082e+06	1.61803e+06	1.94797e+06	1.90038e+06	2.01754e+06	C16915
MWS201384	232.14	70.07	231.133	C8H17N5O3	[M+H]+	Arg-Gly	Amino acids and derivatives	Amino acids and derivatives	108347-93-9	3	18960.2	19027.9	23408.9	14713.7	14066.6	20489.1	-
MEDL00337	288.2	70.07	287.196	C12H25N5O3	[M+H]+	Arg-Leu	Amino acids and derivatives	Amino acids and derivatives	1188-24-5	3	485401	499022	608467	748300	477954	600727	-
MW0105731	361.2	199.08	360.191	C17H24N6O3	[M+H]+	Arg-Trp	Amino acids and derivatives	Amino acids and derivatives	25615-38-7	3	837132	957791	988568	876893	847906	797567	-
MW0105756	274.19	70.07	273.18	C11H23N5O3	[M+H]+	Arg-Val	Amino acids and derivatives	Amino acids and derivatives	2896-20-0	3	189215	172968	236298	175154	171425	153738	-
Zmdp000292	189.14	70.07	188.127	C7H16N4O2	[M+H]+	Arginine methyl ester	Amino acids and derivatives	Amino acids and derivatives	-	1	758951	783183	683374	789939	756438	702175	-
MWSslk234	219.17	121.07	218.167	C15H22O	[M+H]+	Aristolone	Terpenoids	Sesquiterpenoids	25274-27-5	3	53625.1	73124.6	45355.2	35717.7	61775.6	74478.7	-
MWSHY0163	289.071	215.071	288.063	C15H12O6	[M+H]+	Aromadendrin (Dihydrokaempferol)	Flavonoids	Flavanonols	480-20-6	3	48885	84309.8	70319.7	59238.9	89391.8	98935.1	C00974
zjmp122402	389.22	209.15	388.21	C19H32O8	[M+H]+	Aseleposide E	Terpenoids	Monoterpenoids	-	3	142523	171392	110672	173343	196775	206204	-
MWS201388	246.11	141.07	245.101	C9H15N3O5	[M+H]+	Asn-Hyp	Amino acids and derivatives	Amino acids and derivatives	844640-50-2	3	35978.9	21293.8	40219.6	34566.2	29278.5	25064.1	-
Lcsp001308	361.17	200.14	360.164	C14H24N4O7	[M+H]+	Asn-Ile-Asp	Amino acids and derivatives	Amino acids and derivatives	-	3	305092	316355	292837	248262	334649	266102	-
MW0145846	351.13	147.04	350.126	C12H22N4O6S1	[M+H]+	Asn-Met-Ser	Amino acids and derivatives	Amino acids and derivatives	-	3	4.39976e+07	4.99392e+07	4.49763e+07	4.47887e+07	4.75649e+07	4.69407e+07	-
MW0145852	395.16	120.08	394.149	C17H22N4O7	[M+H]+	Asn-Phe-Asp	Amino acids and derivatives	Amino acids and derivatives	-	3	2.73703e+06	2.49435e+06	2.6406e+06	2.28681e+06	2.56505e+06	2.71638e+06	-
MW0145855	337.15	163.04	336.143	C15H20N4O5	[M+H]+	Asn-Phe-Gly	Amino acids and derivatives	Amino acids and derivatives	-	3	2.8661e+07	3.06794e+07	3.05054e+07	3.08977e+07	3.1495e+07	2.96568e+07	-
MW0145954	345.21	186.12	344.206	C15H28N4O5	[M+H]+	Asn-Val-Leu	Amino acids and derivatives	Amino acids and derivatives	-	3	802984	922429	820197	829230	796866	818374	-
MWS201408	263.09	136.04	262.08	C9H14N2O7	[M+H]+	Asp-Glu	Amino acids and derivatives	Amino acids and derivatives	6157-06-8	3	30911	38946.7	32469.7	32572.9	55070.6	37035.3	-
Zbqp003309	360.21	201.12	359.206	C16H29N3O6	[M+H]+	Asp-Ile-Leu	Amino acids and derivatives	Amino acids and derivatives	-	3	852473	1.29704e+06	1.06081e+06	1.18335e+06	1.20125e+06	1.02804e+06	-
MW0146158	348.18	201.12	347.169	C14H25N3O7	[M+H]+	Asp-Ile-Thr	Amino acids and derivatives	Amino acids and derivatives	-	3	904942	965331	889232	715368	697825	919828	-
MWS201455	262.14	84.08	261.132	C10H19N3O5	[M+H]+	Asp-Lys*	Amino acids and derivatives	Amino acids and derivatives	5891-51-0	3	246216	229205	223226	271569	208050	200111	-
MW0146222	394.2	235.11	393.19	C19H27N3O6	[M+H]+	Asp-Phe-Leu	Amino acids and derivatives	Amino acids and derivatives	-	3	602408	664665	700004	696843	747993	802637	-
Lcsp002752	378.17	185.09	377.159	C18H23N3O6	[M+H]+	Asp-Pro-Phe	Amino acids and derivatives	Amino acids and derivatives	-	3	685213	859088	864416	835866	829159	867308	-
MW0105879	320.12	188.07	319.117	C15H17N3O5	[M+H]+	Asp-Trp	Amino acids and derivatives	Amino acids and derivatives	71835-79-5	3	7.04273e+06	6.97709e+06	6.98008e+06	6.53104e+06	6.85563e+06	6.68136e+06	-
MW0146324	380.18	187.11	379.174	C18H25N3O6	[M+H]+	Asp-Val-Phe	Amino acids and derivatives	Amino acids and derivatives	-	3	6.08065e+06	8.42923e+06	7.8215e+06	8.26047e+06	5.83038e+06	8.10998e+06	-
pmn001587	431.12	269.066	432.127	C18H24O12	[M-H]-	Asperulosidic acid	Terpenoids	Monoterpenoids	25368-11-0	3	41391.9	33830.8	54045	44880.9	46393.2	30107.4	-
MWStz079	445.21	224.11	444.205	C27H28N2O4	[M+H]+	Aurantiamide acetate	Alkaloids	Alkaloids	56121-42-7	2	405059	457495	506024	452156	581634	576958	-
MWSHY0100	435.09	303.06	434.085	C20H18O11	[M+H]+	Avicularin(Quercetin-3-O-α-L-arabinofuranoside)*	Flavonoids	Flavonols	572-30-5	3	36201.3	47582.3	66685.6	62863.6	42509.2	41181	C22608
mws0237	187.1	125.1	188.105	C9H16O4	[M-H]-	Azelaic acid	Lipids	Free fatty acids	123-99-9	1	4.53093e+06	4.9152e+06	4.56551e+06	4.15487e+06	4.18573e+06	4.34394e+06	C08261
Lmyp001375	314.09	152.03	313.08	C13H15NO8	[M+H]+	BOA-6-O-glucoside	Alkaloids	Alkaloids	-	3	1.73685e+06	1.90534e+06	1.78568e+06	1.79178e+06	2.00089e+06	1.95234e+06	-
HJAP104	107.05	77.04	106.042	C7H6O	[M+H]+	Benzaldehyde	Others	Aldehyde compounds	100-52-7	3	635712	691714	787794	604535	679808	724661	C00261
pmb0069	122.06	105.03	121.053	C7H7NO	[M+H]+	Benzamide	Alkaloids	Alkaloids	55-21-0	3	425252	487564	466012	405795	444655	465333	C09815
pme0241	123.04	79.05	122.037	C7H6O2	[M+H]+	Benzoic acid	Phenolic acids	Phenolic acids	65-85-0	3	430931	343475	445394	368102	352890	344092	C00180
MWSslk072	163.05	146.02	162.043	C8H6N2O2	[M+H]+	Benzoyleneurea	Alkaloids	Alkaloids	86-96-4	3	45445.3	61356.8	54204.5	35887.6	41412.6	49045.2	-
Lmyn002435	415.16	253.07	416.168	C19H28O10	[M-H]-	Benzyl alcohol beta-D-rutinoside	Others	Others	-	3	128789	88278.6	84387.6	109896	83939.6	72435.4	-
Hmln003529	401.15	269.11	402.153	C18H26O10	[M-H]-	Benzyl β-primeveroside	Others	Others	130622-31-0	2	231063	260565	283467	277636	265279	294228	-
Cmjn004337	401.14	269.1	402.153	C18H26O10	[M-H]-	Benzyl-(2''-O-xylosyl)glucoside	Others	Others	-	1	247656	335303	215607	351592	285993	282282	-
Zbfn013528	271.23	225.22	272.235	C16H32O3	[M-H]-	Beta-Hydroxypalmitic Acid*	Lipids	Free fatty acids	-	1	2.58808e+07	2.2268e+07	2.93403e+07	2.7316e+07	2.66824e+07	2.5825e+07	-
MWSmce389	209.12	179.07	208.11	C12H16O3	[M+H]+	Beta-asarone	Others	Others	5273-86-9	3	207670	194357	166295	184056	172413	162177	C10430
MWSmce548	118.09	58.07	117.079	C5H11NO2	[M+H]+	Betaine	Alkaloids	Alkaloids	107-43-7	3	203493	136378	151531	192826	160609	142942	C00719
pme2266	245.1	227.08	244.088	C10H16N2O3S	[M+H]+	Biotin	Others	Vitamin	58-85-5	3	563905	663550	589719	648629	573201	633303	C00120
Wbkn011324	665.38	605.36	666.377	C39H54O9	[M-H]-	Bruceajavanone B	Terpenoids	Triterpene	-	3	58670.8	62201.2	121854	65629.4	59481.5	133984	-
Jmbn003202	235.12	59.01	236.126	C10H20O6	[M-H]-	Butyl Beta-D-Fructopyranoside	Others	Saccharides	67884-27-9	3	71654.1	64376.1	68838.2	82262.6	54866.9	68141.3	-
Hmqp001042	237.13	98.97	236.126	C10H20O6	[M+H]+	Butyl beta-D-glucoside	Others	Saccharides	5391-18-4	3	631244	1.08041e+06	926987	969292	898890	995751	-
MWSmce341	279.16	149.03	278.152	C16H22O4	[M+H]+	Butyl isobutyl phthalate*	Phenolic acids	Phenolic acids	17851-53-5	1	1.21883e+07	1.18728e+07	1.19851e+07	1.26716e+07	1.22194e+07	1.17754e+07	-
MWSmce041	191.1	145.1	190.099	C12H14O2	[M+H]+	Butylphthalide	Others	Lactones	6066-49-5	3	58307.8	40108.9	39188.8	42189.7	52786.4	37652.1	C17854
mws2212	179.03	135.05	180.042	C9H8O4	[M-H]-	Caffeic acid	Phenolic acids	Phenolic acids	331-39-5	1	786015	951982	909729	915679	886708	970821	C01197
Lmsn002548	341.09	161.02	342.095	C15H18O9	[M-H]-	Caffeic acid 4-O-glucoside	Phenolic acids	Phenolic acids	14364-08-0	1	6.28317e+06	6.49812e+06	7.06411e+06	6.14501e+06	6.2399e+06	6.38545e+06	C10433
mws2218	195.09	83.06	194.08	C8H10N4O2	[M+H]+	Caffeine	Alkaloids	Alkaloids	58-08-2	1	2.77759e+06	2.64928e+06	2.70779e+06	2.77184e+06	2.85263e+06	2.69814e+06	C07481
mad2085	457.078	295.045	458.085	C22H18O11	[M-H]-	Caffeoyl-p-coumaroyltartaric acid	Phenolic acids	Phenolic acids	-	3	147369	140655	113337	149984	137042	153317	-
Laxp003920	344.11	163.04	343.106	C18H17NO6	[M+H]+	CaffeoylTyrosine	Alkaloids	Alkaloids	-	1	7.69698e+06	9.68853e+06	7.64622e+06	1.10194e+07	1.10794e+07	8.30618e+06	-
pma0101	293.16	163.04	292.154	C14H20N4O3	[M+H]+	Caffeoylagmatine	Alkaloids	Phenolamine	-	3	284662	198091	219506	279555	216506	235505	-
pmp001244	266.14	207.07	266.139	C14H20NO4+	[M]+	Caffeoylcholine	Alkaloids	Phenolamine	87189-10-4	2	14774.9	33568.1	56926.8	31958.5	75344.5	64759.8	-
Wasyqp2943	372.13	163.04	371.121	C16H21NO9	[M+H]+	Caffeoylmethylgluconamide	Alkaloids	Alkaloids	-	1	75070.5	36076	32916.7	56486.6	66766.4	41551.8	-
Lcfp001116	470.25	163.04	469.242	C22H35N3O8	[M+H]+	Caffeoylspermidineglucoside	Alkaloids	Phenolamine	-	2	2.67146e+06	2.48306e+06	2.73083e+06	2.89195e+06	2.38219e+06	2.43845e+06	-
Labn003679	327.11	147.05	328.116	C15H20O8	[M-H]-	Caffeyl alcohol 4-O-β-D-glucopyranoside	Others	Alcohol compounds	-	1	6.70549e+06	8.16179e+06	7.44911e+06	8.87434e+06	8.36054e+06	8.27578e+06	-
Lhjp111628	553.161	175.037	552.148	C25H28O14	[M+H]+	Caffeylscandoside	Terpenoids	Monoterpenoids	-	3	21378.4	33913.3	24566.8	46750.5	51780.8	25894.7	-
MWStz322	340.15	340.15	339.147	C20H21NO4	[M+H]+	Canadine; Tetrahydroberberine	Alkaloids	Isoquinoline alkaloids	5096-57-1	3	215539	244975	204255	186842	248396	242449	C03329
Wbkp006944	221.07	193.08	220.064	C14H8N2O	[M+H]+	Canthin-4-one*	Alkaloids	Alkaloids	-	3	2.91642e+06	3.34513e+06	2.87152e+06	3.20369e+06	3.29163e+06	3.21032e+06	-
MWStz213	221.07	193.08	220.064	C14H8N2O	[M+H]+	Canthin-6-one*	Alkaloids	Plumerane	479-43-6	3	3.0278e+06	3.43057e+06	3.05822e+06	3.37446e+06	3.49182e+06	3.34994e+06	C09098
Yacn003968	206.08	147.04	207.089	C11H13NO3	[M-H]-	Cantleyine	Alkaloids	Alkaloids	30333-81-4	3	6.03504e+06	6.99395e+06	6.30034e+06	6.29877e+06	6.8066e+06	6.55602e+06	C09933
pmn001716	447.093	285.041	448.101	C21H20O11	[M-H]-	Carthamone*	Flavonoids	Chalcones	86579-00-2	3	53791.9	59630	49098.6	63412.3	56027.7	76325.1	C08598
MWSslk244	375.11	342.08	374.1	C19H18O8	[M+H]+	Casticin (5,3'-Dihydroxy-3,6,7,4'-Tetramethoxyflavone)	Flavonoids	Flavonols	479-91-4	3	82184.9	102469	71623	83712.1	84032.5	84827.1	-
MWSHY0065	291.086	139.038	290.079	C15H14O6	[M+H]+	Catechin	Flavonoids	Flavanols	154-23-4	3	204403	159613	172627	179461	191425	217703	C06562
Zajn002491	451.12	289.07	452.132	C21H24O11	[M-H]-	Catechin 4'-O-beta-D-glucopyranoside	Flavonoids	Flavanols	-	3	408110	489690	497384	426124	447708	488498	-
Zmhn001257	451.124	289.072	452.132	C21H24O11	[M-H]-	Catechin-5-O-glucoside	Flavonoids	Flavanols	-	3	1.86818e+06	1.95818e+06	2.35168e+06	1.84128e+06	2.27403e+06	2.29408e+06	-
Zmgp005070	523.14	361.09	522.137	C24H26O13	[M+H]+	Centaurein*	Flavonoids	Flavonols	35595-03-0	3	9.22591e+06	9.58239e+06	8.02445e+06	8.60216e+06	9.32972e+06	9.12251e+06	-
Wbhp009366	351.25	351.25	350.246	C21H34O4	[M+H]+	Ceriopsin B	Terpenoids	Terpene	-	3	496998	616914	558846	483570	538379	535107	-
MWSHC20163	255.24	255.24	256.24	C16H32O2	[M-H]-	Cetostearic acid	Lipids	Free fatty acids	-	1	1.47753e+06	1.32749e+06	1.58428e+06	1.50979e+06	1.47353e+06	1.4638e+06	-
Lmjn008379	265.14	221.15	266.152	C15H22O4	[M-H]-	Chloranthalic acid	Terpenoids	Sesquiterpenoids	-	3	41109.6	44359.9	43353.3	41012.5	37278.2	31760.2	-
mws0178	353.09	191.06	354.095	C16H18O9	[M-H]-	Chlorogenic acid (3-O-Caffeoylquinic acid)*	Phenolic acids	Phenolic acids	327-97-9	1	2.58472e+06	2.60206e+06	2.48238e+06	2.75581e+06	2.94244e+06	2.43303e+06	C00852
mws0179	367.1	190.9	368.111	C17H20O9	[M-H]-	Chlorogenic acid methyl ester	Phenolic acids	Phenolic acids	29708-87-0	2	100191	57846.7	75501.5	57312.9	89055	54875	-
pmb0484	104.11	60.08	104.107	C5H14NO+	[M]+	Choline	Alkaloids	Alkaloids	62-49-7	3	4.90109e+06	5.31943e+06	4.66574e+06	4.84094e+06	5.14137e+06	5.32892e+06	C00114
MWSHY0071	255.06	153.02	254.058	C15H10O4	[M+H]+	Chrysin	Flavonoids	Flavones	480-40-0	3	48971.6	60617.7	55927.7	55690	55796.7	67935.3	C10028
Lmyp005841	417.12	255.06	416.111	C21H20O9	[M+H]+	Chrysin-7-O-glucoside	Flavonoids	Flavones	31025-53-3	3	40193.5	49574.6	57803	34921.6	32766.3	64712	-
pmb2997	799.19	461.1	800.201	C34H40O22	[M-H]-	Chrysoeriol-7-O-Sophoroside-5-O-glucuronide	Flavonoids	Flavones	-	3	23401.7	15396.2	28108.6	34557.8	36055.2	22046.9	-
Zbrn008158	299.06	284.03	300.063	C16H12O6	[M-H]-	Chrysoeriol; 5,7,4'-Trihydroxy-3'-Methoxyflavone*	Flavonoids	Flavones	491-71-4	2	131131	188579	154395	149485	162706	164264	C04293
Zmjp009119	375.11	345.06	374.1	C19H18O8	[M+H]+	Chrysosplenetin (5,4'-Dihydroxy-3,6,7,3'-tetramethoxyflavone)	Flavonoids	Flavones	603-56-5	3	33026.8	42100.4	42145.4	37229.4	41095.4	51067.5	C10030
Lmbn001162	339.07	177.02	340.079	C15H16O9	[M-H]-	Cichoriin*	Lignans and Coumarins	Coumarins	531-58-8	3	146740	166717	132576	164053	139389	147771	C09206
pmp001141	506.2	177.06	505.195	C25H31NO10	[M+H]+	Cimicifugamide	Alkaloids	Phenolamine	-	3	1.03459e+06	1.16546e+06	1.45179e+06	1.28914e+06	1.13347e+06	1.09853e+06	-
Smgp005565	453.11	343.08	452.111	C24H20O9	[M+H]+	Cinchonain Ia*	Flavonoids	Flavanols	85022-69-1	3	1.32577e+06	969932	1.05653e+06	1.10538e+06	1.08585e+06	1.04588e+06	-
Smgp105565	453.11	343.08	452.111	C24H20O9	[M+H]+	Cinchonain Ib*	Flavonoids	Flavanols	85081-24-9	3	1.40693e+06	1.04588e+06	1.29233e+06	1.29169e+06	1.12589e+06	1.21094e+06	C10217
pmn001417	451.103	341.102	452.111	C24H20O9	[M-H]-	Cinchonain Ic	Flavonoids	Flavanols	85081-22-7	3	103640	124689	100283	135471	140566	111183	-
pmn001418	451.103	341.102	452.111	C24H20O9	[M-H]-	Cinchonain Id	Flavonoids	Flavanols	85022-67-9	3	129791	152141	114020	112954	153937	158985	-
MWSmce572	148.08	103.06	147.068	C9H9NO	[M+H]+	Cinnamamide	Alkaloids	Alkaloids	22031-64-7	3	19487.8	21540.3	16764.1	22299.4	17013.8	11023.2	-
HJN043	863.188	711.142	864.19	C45H36O18	[M-H]-	Cinnamtannin B1	Tannins	Tannin	88082-60-4	3	21204.6	32269.8	19464.3	21374.7	16097.3	27575.7	C17631
pmn001648	863.183	411.071	864.19	C45H36O18	[M-H]-	Cinnamtannin D1	Tannins	Tannin	97233-06-2	3	23008.6	26973	30541.2	27061	35929.3	35331.9	C17632
mws0371	327.23	283.24	328.24	C22H32O2	[M-H]-	Cis-4,7,10,13,16,19-Docosahexaenoic Acid	Lipids	Free fatty acids	6217-54-5	3	17183.2	23493.6	18020.6	16184.2	18716.7	14000.3	C06429
pme2550	173.01	129.02	174.016	C6H6O6	[M-H]-	Cis-Aconitic acid	Organic acids	Organic acids	585-84-2	3	994716	1.194e+06	1.10728e+06	928537	964703	1.15954e+06	C00417
pmn001687	295.046	163.042	296.053	C13H12O8	[M-H]-	Cis-Coutaric acid	Phenolic acids	Phenolic acids	67920-37-0	3	351827	454130	371473	420522	482418	464174	-
MWS04455	132.065	86.0607	131.058	C5H9NO3	[M+H]+	Cis-L-3-hydroxyproline*	Amino acids and derivatives	Amino acids and derivatives	567-35-1	3	106559	113777	133337	63839.5	129684	82932.7	C19706
Laxp004467	328.12	147.04	327.111	C18H17NO5	[M+H]+	Cis-N-(4-hydroxycinnamyl)tyrosine	Alkaloids	Alkaloids	-	1	3.28859e+06	3.89647e+06	2.84288e+06	3.23764e+06	4.10664e+06	3.69298e+06	-
MWSmce613	489.12	264.04	488.107	C14H26N4O11P2	[M+H]+	Citicoline	Nucleotides and derivatives	Nucleotides and derivatives	987-78-0	3	49469.7	54249.3	55012.3	43240.2	45502	39332.6	C00307
mws0281	191.02	111.01	192.027	C6H8O7	[M-H]-	Citric Acid	Organic acids	Organic acids	77-92-9	1	5.88485e+06	3.34075e+06	3.3332e+06	4.76836e+06	4.56621e+06	4.90374e+06	C00158
Wayn000884	353.073	111.004	354.08	C12H18O12	[M-H]-	Citric acid glucoside	Organic acids	Organic acids	-	3	216261	150229	221508	214501	154108	169138	-
Wayn000597	515.12	111.01	516.133	C18H28O17	[M-H]-	Citric acid-1-O-diglucoside	Organic acids	Organic acids	-	3	1.9342e+06	1.19188e+06	1.51619e+06	1.17902e+06	1.27052e+06	1.51926e+06	-
MWSmce158	157.155	55.0536	156.151	C10H20O	[M+H]+	Citronellol	Others	Alcohol compounds	1117-61-9	3	68132.8	58924.6	49242.6	58042.3	83270	70174.1	C09849
pmp001235	195.14	79.05	194.131	C12H18O2	[M+H]+	Cnidilide*	Others	Lactones	-	3	119199	135637	114070	160457	149064	144934	C16937
Lacp006503	249.148	161.132	248.141	C15H20O3	[M+H]+	Codonolactone	Terpenoids	Sesquiterpenoids	-	3	173907	182383	159794	213900	204720	211982	C17887
Hmyn005972	589.518	283.26	590.527	C38H70O4	[M-H]-	Coixenolide	Lipids	Free fatty acids	-	3	27363.3	20641.4	21992.4	19619.8	17663.6	26904.2	C17566
Lmyp003025	206.08	146.06	205.074	C11H11NO3	[M+H]+	Coixlactam	Alkaloids	Quinoline alkaloids	-	3	112167	107260	156767	121766	122974	124883	-
mws0009	179.07	91.06	178.063	C10H10O3	[M+H]+	Coniferaldehyde	Others	Aldehyde compounds	20649-42-7	1	283088	327861	291477	250807	380693	357121	C02666
mws0906	341.12	179.07	342.132	C16H22O8	[M-H]-	Coniferin	Others	Alcohol compounds	531-29-3	3	4.3975e+06	4.34266e+06	5.44433e+06	4.28293e+06	4.45346e+06	3.82125e+06	C00761
mws1715	252.109	136.062	251.102	C10H13N5O3	[M+H]+	Cordycepin (3'-Deoxyadenosine)*	Nucleotides and derivatives	Nucleotides and derivatives	73-03-0	3	3.1495e+06	3.45952e+06	3.26333e+06	3.74909e+06	3.3635e+06	3.74934e+06	C08431
Zmsn002206	375.13	153.06	376.137	C16H24O10	[M-H]-	Cornusoside A	Others	Others	-	3	120287	99463.2	125584	144725	92820.3	131388	-
MWSmce026	383.189	267.145	382.189	C22H26N2O4	[M+H]+	Corynoxeine	Alkaloids	Plumerane	630-94-4	3	1.46892e+06	1.50135e+06	1.46276e+06	1.40574e+06	1.65143e+06	1.52599e+06	-
Smgp004888	385.21	160.07	384.205	C22H28N2O4	[M+H]+	Corynoxine*	Alkaloids	Plumerane	6877-32-3	3	685386	708502	625921	710236	799297	691229	-
MWSHC20109	147.04	91.06	146.037	C9H6O2	[M+H]+	Coumarin	Lignans and Coumarins	Coumarins	91-64-5	2	30072.9	17533.7	16545.8	38783.8	44413.9	55589.9	C05851
Wcfn003424	337.09	191.06	338.1	C16H18O8	[M-H]-	Coumaroyl Quinic Acid	Others	Others	-	3	6.03383e+06	6.2391e+06	6.92164e+06	6.53565e+06	6.21345e+06	6.42652e+06	-
MWSmce139	269.039	241.048	268.037	C15H8O5	[M+H]+	Coumestrol	Lignans and Coumarins	Coumarins	479-13-0	3	45392.4	41777.7	40087.5	54212.5	35277.7	43004.4	C10205
Lhkp101526	275.13	219.06	274.12	C16H18O4	[M+H]+	Coumurrayin	Lignans and Coumarins	Coumarins	17245-25-9	3	25040.7	29222.3	32347.2	30020	25525.4	33063.4	-
pme1936	114.066	86.0713	113.059	C4H7N3O	[M+H]+	Creatinine	Organic acids	Organic acids	60-27-5	3	100362	93919.8	97228.3	103563	100024	110093	C00791
Lmbn005923	277.217	59.0139	278.225	C18H30O2	[M-H]-	Crepenynic acid*	Lipids	Free fatty acids	2277-31-8	1	127226	119455	119326	117709	107511	120538	C07289
Zmyp000878	284.1	152.06	283.092	C10H13N5O5	[M+H]+	Crotonoside; 2-Hydroxyadenosine	Nucleotides and derivatives	Nucleotides and derivatives	1818-71-9	1	5.78828e+06	6.63604e+06	5.7598e+06	5.80325e+06	5.39629e+06	5.86546e+06	C08432
mws2108	353.09	191.06	354.095	C16H18O9	[M-H]-	Cryptochlorogenic acid (4-O-Caffeoylquinic acid)*	Phenolic acids	Phenolic acids	905-99-7	1	2.52212e+06	3.01989e+06	2.68815e+06	2.51362e+06	2.79596e+06	2.7535e+06	-
MWSmce642	237.19	135.12	236.178	C15H24O2	[M+H]+	Curcumol	Terpenoids	Sesquiterpenoids	4871-97-0	3	237932	199143	220570	240804	250180	239195	-
mws0884	328.05	134.05	329.053	C10H12N5O6P	[M-H]-	Cyclic 3',5'-Adenylic acid	Nucleotides and derivatives	Nucleotides and derivatives	60-92-4	3	191802	225994	195330	212508	205612	214551	C00575
MWSHC2030	261.124	136.076	260.116	C14H16N2O3	[M+H]+	Cyclo (L-Prolyl-L-tyrosine*	Amino acids and derivatives	Amino acids and derivatives	4549-02-4	1	1.29439e+06	1.39693e+06	1.3113e+06	1.4089e+06	1.48766e+06	1.40268e+06	-
MWSmce706	129.07	56.05	128.059	C5H8N2O2	[M+H]+	Cyclo(Ala-Gly)	Amino acids and derivatives	Amino acids and derivatives	4526-77-6	3	870326	683819	398981	325771	443788	390416	-
MWStz261	211.14	70.07	210.137	C11H18N2O2	[M+H]+	Cyclo(D-Leu-L-Pro)*	Amino acids and derivatives	Amino acids and derivatives	36238-67-2	1	640448	643865	603670	778947	673994	601393	-
MWStz205	245.129	120.084	244.121	C14H16N2O2	[M+H]+	Cyclo(D-Phe-L-Pro)*	Amino acids and derivatives	Amino acids and derivatives	26488-24-4	1	912806	1.02813e+06	970712	945804	889999	992566	-
MWStz083	197.13	70.07	196.121	C10H16N2O2	[M+H]+	Cyclo(D-Val-L-Pro)	Amino acids and derivatives	Amino acids and derivatives	27483-18-7	3	818200	972861	888939	943176	930006	898720	-
MWStz091	169.1	70.07	168.09	C8H12N2O2	[M+H]+	Cyclo(L-Ala-L-Pro)	Amino acids and derivatives	Amino acids and derivatives	36357-32-1	1	533056	617918	517109	610423	467314	530940	-
MWStz170	227.14	86.063	226.132	C11H18N2O3	[M+H]+	Cyclo(L-Leu-trans-4-hydroxy-L-Pro)	Amino acids and derivatives	Amino acids and derivatives	115006-86-5	3	98474.9	81803.4	83859.1	93640.4	75068.6	82543.1	-
MWStz211	261.125	120.082	260.116	C14H16N2O3	[M+H]+	Cyclo(L-Phe-trans-4-hydroxy-L-Pro)	Amino acids and derivatives	Amino acids and derivatives	118477-06-8	3	61810.8	73847.4	117142	127898	123786	121457	-
MWSHC20182	261.12	136.08	260.116	C14H16N2O3	[M+H]+	Cyclo(L-tyrosyl-D-proline)*	Amino acids and derivatives	Amino acids and derivatives	61117-56-4	1	1.2785e+06	1.3439e+06	1.2131e+06	1.28803e+06	1.47398e+06	1.45986e+06	-
Lmrj002793	277.12	120.08	276.111	C14H16N2O4	[M+H]+	Cyclo(Phe-Glu)	Amino acids and derivatives	Amino acids and derivatives	-	1	101772	112599	108240	87083.8	91550.7	141505	-
Lmhp001430	227.1	116.07	226.095	C10H14N2O4	[M+H]+	Cyclo(Pro-Glu)	Amino acids and derivatives	Amino acids and derivatives	-	3	899586	948578	946619	766433	973279	912786	-
Lmhp002764	211.13	70.07	210.137	C11H18N2O2	[M+H]+	Cyclo(Pro-Leu)*	Amino acids and derivatives	Amino acids and derivatives	5654-86-4	1	764016	774169	783840	948615	817953	794425	-
MWStz255	245.13	120.08	244.121	C14H16N2O2	[M+H]+	Cyclo(Pro-Phe)*	Amino acids and derivatives	Amino acids and derivatives	3705-26-8	1	867971	1.03051e+06	919547	900776	822025	995485	C11847
Lmrj002244	195.11	70.06	194.106	C10H14N2O2	[M+H]+	Cyclo(Pro-Pro)	Amino acids and derivatives	Amino acids and derivatives	6708-06-1	3	57804.1	72705.6	49124.7	78967.7	65504.6	57786.7	-
Lmrj002698	197.129	72.08	196.121	C10H16N2O2	[M+H]+	Cyclo(Pro-Val)	Amino acids and derivatives	Amino acids and derivatives	5654-87-5	3	40887.8	70298.1	63177	130524	68634.1	64479.7	-
MWStz389	185.09	70.07	184.085	C8H12N2O3	[M+H]+	Cyclo(Ser-Pro)	Amino acids and derivatives	Amino acids and derivatives	1355217-25-2	1	519742	613110	526072	652909	522704	672400	-
Hmlp001371	235.108	120.081	234.1	C12H14N2O3	[M+H]+	Cyclo(Tyr-Ala)	Amino acids and derivatives	Amino acids and derivatives	21754-26-7	3	432666	522415	397603	427100	449054	453634	-
Lmrj002261	171.113	72.08	170.106	C8H14N2O2	[M+H]+	Cyclo(Val-Ala)	Amino acids and derivatives	Amino acids and derivatives	15136-27-3	3	109165	130159	141194	124705	152285	129570	-
Lcfp121068	254.16	195.11	253.154	C11H19N5O2	[M+H]+	CycloPro-Arg	Amino acids and derivatives	Amino acids and derivatives	-	1	2.52913e+07	2.80317e+07	2.46347e+07	2.76177e+07	2.83618e+07	2.79153e+07	-
ML10181668	130.09	84.08	129.079	C6H11NO2	[M+H]+	Cycloleucine	Amino acids and derivatives	Amino acids and derivatives	52-52-8	3	2.1707e+06	2.58771e+06	2.40038e+06	2.3412e+06	2.48567e+06	2.6595e+06	C03969
Zmdn003480	537.2	375.15	538.205	C26H34O12	[M-H]-	Cycloolivil-6-O-glucoside	Lignans and Coumarins	Lignans	-	3	738876	591426	634567	790107	730204	727931	-
MWStz126	412.32	114.09	411.314	C27H41NO2	[M+H]+	Cyclopamine	Alkaloids	Terpenoid alkaloids	4449-51-8	3	61843.1	73364.3	44289.3	56174.9	53472	52651.2	C10798
MW0148013	330.12	168.07	329.116	C12H19N5O4S1	[M+H]+	Cys-His-Ala	Amino acids and derivatives	Amino acids and derivatives	-	3	1.681e+06	1.92258e+06	2.07169e+06	1.92879e+06	1.69213e+06	1.73638e+06	-
ML10180524	244.09	112.05	243.085	C9H13N3O5	[M+H]+	Cytarabine	Nucleotides and derivatives	Nucleotides and derivatives	147-94-4	3	4.59593e+06	3.80953e+06	4.20507e+06	3.69982e+06	4.85338e+06	4.1109e+06	C02961
pme3732	244.09	112.05	243.085	C9H13N3O5	[M+H]+	Cytidine	Nucleotides and derivatives	Nucleotides and derivatives	65-46-3	3	1.61558e+06	1.26302e+06	1.61888e+06	2.10953e+06	1.44284e+06	1.7182e+06	C00475
MWSslk257	324.06	112.05	323.052	C9H14N3O8P	[M+H]+	Cytidine 5'-monophosphate(Cytidylic acid)	Nucleotides and derivatives	Nucleotides and derivatives	63-37-6	3	152162	86154.7	109966	82959.6	143215	121959	C00055
mws0255	112.05	95.02	111.043	C4H5N3O	[M+H]+	Cytosine	Nucleotides and derivatives	Nucleotides and derivatives	71-30-7	3	422193	629738	504439	589593	643641	577514	C00380
MWS04555g	132.102	86.0975	131.095	C6H13NO2	[M+H]+	D-Allo-Isoleucine*	Amino acids and derivatives	Amino acids and derivatives	1509-35-9	1	953572	829817	950282	736304	1.01202e+06	825549	C21092
mws0437	151.06	59.01	152.069	C5H12O5	[M-H]-	D-Arabitol*	Others	Saccharides	488-82-4	3	47543.4	52677.6	27170.1	30434.8	42395.6	45342.6	C01904
MWSmce203	341.12	73.03	342.116	C12H22O11	[M-H]-	D-Cellobiose	Others	Saccharides	528-50-7	3	1.42612e+06	1.55026e+06	1.31769e+06	1.35617e+06	1.33054e+06	1.40816e+06	-
Zmzn000079	199	78.96	200.009	C4H9O7P	[M-H]-	D-Erythrose-4-phosphate	Others	Saccharides	585-18-2	3	1.09896e+06	1.83839e+06	1.4203e+06	1.7184e+06	1.30579e+06	1.57861e+06	C00279
MWS2442	259.02	96.97	260.03	C6H13O9P	[M-H]-	D-Fructose 6-Phosphate*	Others	Saccharides	643-13-0	3	38563.1	32580.9	44336.9	41169.9	43460.2	41997.5	C00085
mws1164	179.06	59.01	180.063	C6H12O6	[M-H]-	D-Fructose*	Others	Saccharides	57-48-7	1	246662	240198	247804	221475	256103	237171	C05003
Zmpn000199	209.03	85.03	210.038	C6H10O8	[M-H]-	D-Galactaric acid	Others	Saccharides	526-99-8	3	173041	140871	149406	160409	146676	141753	C00879
pmf0139	179.06	59.01	180.063	C6H12O6	[M-H]-	D-Galactose*	Others	Saccharides	59-23-4	1	229490	234968	250890	173580	216752	207300	C00124
mws1189	193.04	72.99	194.043	C6H10O7	[M-H]-	D-Galacturonic acid*	Others	Saccharides	685-73-4	3	82592	53425.5	60801.8	40983.8	56608.6	57847.1	C00333
pme3705	193.04	72.99	194.043	C6H10O7	[M-H]-	D-Glucoronic acid*	Others	Saccharides	6556-12-3	3	58417.2	54092.8	43141.8	49232.2	57482.3	72754	C00191
Zmyn000110	258.04	78.96	259.046	C6H14NO8P	[M-H]-	D-Glucosamine 1-phosphate	Others	Saccharides	2152-75-2	3	39193.5	52360.5	50393.3	49074.6	55266.5	44032.6	C06156
mws0866	259.022	96.9696	260.03	C6H13O9P	[M-H]-	D-Glucose 6-phosphate*	Others	Saccharides	56-73-5	3	44692.8	40477.8	43431.1	47311.3	46930.7	51986.8	C00092
mws4170	179.056	59.0139	180.063	C6H12O6	[M-H]-	D-Glucose*	Others	Saccharides	50-99-7	1	250627	258816	223433	233261	222958	265763	C00031
mws1090	259.02	96.97	260.03	C6H13O9P	[M-H]-	D-Glucose-1-phosphate*	Others	Saccharides	59-56-3	3	49128.7	51405.4	39479.3	32077	45502.6	54861.2	C00103
mws4175	175.02	85.03	176.032	C6H8O6	[M-H]-	D-Glucurono-6,3-lactone	Others	Saccharides	32449-92-6	3	20049.5	20710.5	23400.4	26196.1	24712.3	36692.1	C02670
Lmxn000398	341.11	89.02	342.116	C12H22O11	[M-H]-	D-Lactose*	Others	Saccharides	63-42-3	1	955297	1.25204e+06	1.09881e+06	1.16484e+06	1.20548e+06	1.24359e+06	C01970
Wacyp06352	496.27	163.06	478.241	C22H38O11	[M+NH4]+	D-Linalool 3-(6''-glucosyl)glucoside	Terpenoids	Monoterpenoids	-	3	489732	409915	412707	516537	479052	408290	-
MWS1709	133.01	71.01	134.022	C4H6O5	[M-H]-	D-Malic acid*	Organic acids	Organic acids	636-61-3	1	932033	525425	900818	793339	698104	674410	C00497
Lmsn000381	341.109	89.0244	342.116	C12H22O11	[M-H]-	D-Maltose*	Others	Saccharides	69-79-4	1	999728	1.14058e+06	995754	1.09273e+06	1.06011e+06	1.08485e+06	C01971
mws1593	665.21	161.04	666.222	C24H42O21	[M-H]-	D-Maltotetraose	Others	Saccharides	34612-38-9	1	286718	214362	261611	243575	231095	253013	C02052
mws1155	181.072	101.024	182.079	C6H14O6	[M-H]-	D-Mannitol*	Others	Saccharides	69-65-8	1	383545	403177	363877	231715	339018	394918	C00392
pmf0138	179.06	59.01	180.063	C6H12O6	[M-H]-	D-Mannose*	Others	Saccharides	3458-28-4	1	201796	188748	175302	175617	178566	170809	C00159
pme0500	503.16	323.1	504.169	C18H32O16	[M-H]-	D-Melezitose	Others	Saccharides	597-12-6	1	8.6538e+06	7.42433e+06	7.67623e+06	6.38734e+06	7.94317e+06	7.73129e+06	C08243
mws4532g	133.1	70.07	132.09	C5H12N2O2	[M+H]+	D-Ornithine	Amino acids and derivatives	Amino acids and derivatives	348-66-3	3	45270	69204.3	49549.8	61172	51690.3	69135	-
mws1589	503.16	179.06	504.169	C18H32O16	[M-H]-	D-Panose*	Others	Saccharides	33401-87-5	1	6.46823e+06	7.34108e+06	6.51548e+06	5.71172e+06	5.98601e+06	7.57281e+06	C00713
pme1261	206.139	76.0757	205.131	C9H19NO4	[M+H]+	D-Panthenol	Others	Alcohol compounds	81-13-0	3	15343.6	15649.3	13193.2	17173.7	16571.5	20475.8	C05944
mws1337	220.12	90.05	219.111	C9H17NO5	[M+H]+	D-Pantothenic Acid	Others	Vitamin	79-83-4	2	6.76485e+06	8.50917e+06	7.3424e+06	7.86781e+06	7.90259e+06	8.01533e+06	C00864
Wahlp02159	382.17	220.12	381.163	C15H27NO10	[M+H]+	D-Pantothenic Acid 4'-O-Beta-Glucoside	Others	Vitamin	29588-37-2	1	476829	481172	449408	364364	409521	314998	-
mws2104	193.07	59.01	194.079	C7H14O6	[M-H]-	D-Pinitol	Others	Saccharides	10284-63-6	3	133230	87569.1	118195	100583	93709.4	108079	C03844
Rfmb318	144.102	84.0813	144.102	C7H14NO2+	[M]+	D-Proline betaine	Amino acids and derivatives	Amino acids and derivatives	1195-94-4	3	438023	497312	460011	447307	370831	474381	C21514
Zmyn000108	209.03	85.03	210.038	C6H10O8	[M-H]-	D-Saccharic acid	Others	Saccharides	87-73-0	3	66413	59952.3	64433.7	56872.1	61488.9	56256.7	C00818
mws0214	181.07	71.01	182.079	C6H14O6	[M-H]-	D-Sorbitol	Others	Saccharides	50-70-4	1	673015	829965	656881	566587	621632	919162	C00794
pme0519	341.11	119.03	342.116	C12H22O11	[M-H]-	D-Sucrose*	Others	Saccharides	57-50-1	1	1.30916e+06	1.3346e+06	1.2349e+06	1.42734e+06	1.30758e+06	1.46888e+06	C00089
Lmzn001983	375.13	135.05	376.137	C16H24O10	[M-H]-	D-Threo-guaiacylglycerol-7-O-β-D-glucoside	Others	Alcohol compounds	-	1	37715.4	26262.5	32787.9	28437.4	22955.3	19197.5	-
pma0134	121.05	93.06	120.042	C4H8O4	[M+H]+	D-Threose	Others	Saccharides	95-43-2	3	32422.7	19558.5	54671.2	17500.3	39022.9	23873.7	C06463
mws0264	341.11	119.03	342.116	C12H22O11	[M-H]-	D-Trehalose*	Others	Saccharides	99-20-7	1	1.21838e+06	1.27592e+06	1.18851e+06	1.37673e+06	1.23846e+06	1.35801e+06	C01083
mws0344	165.04	75.01	166.048	C5H10O6	[M-H]-	D-Xylonic acid	Others	Saccharides	526-91-0	3	250235	254314	254962	240328	259303	258683	C00502
Waptn06507	739.41	397.13	680.398	C33H60O14	[M+CH3COO]-	DGMG 18:1	Lipids	Glycerol ester	-	3	11365.8	14343.3	9980.01	15612.7	10898.6	16779.1	-
Waptn06683	739.41	397.13	680.398	C33H60O14	[M+CH3COO]-	DGMG 18:1(2n isomer)	Lipids	Glycerol ester	-	2	27440.7	23039.4	26758	33950.1	30776.1	27499.1	-
Waptn06322	737.4	397.13	678.383	C33H58O14	[M+CH3COO]-	DGMG 18:2(2n isomer)	Lipids	Glycerol ester	-	1	47122.9	57037.5	29090.7	74082.9	40529.8	44507.9	-
MWS4295	299.26	253.25	300.266	C18H36O3	[M-H]-	DL-2-hydroxystearic acid*	Lipids	Free fatty acids	629-22-1	1	1.47514e+06	1.06107e+06	1.59433e+06	1.54497e+06	1.55223e+06	1.49536e+06	-
MWS0274	165.06	119.05	166.063	C9H10O3	[M-H]-	DL-3-Phenyllactic acid	Phenolic acids	Phenolic acids	828-01-3	1	131336	134308	130464	147205	129774	120191	-
MWS1926	132.1	86.1	131.095	C6H13NO2	[M+H]+	DL-Leucine*	Amino acids and derivatives	Amino acids and derivatives	328-39-2	1	5.21497e+06	6.63208e+06	5.42878e+06	6.26294e+06	6.14307e+06	6.7306e+06	-
mws0224	150.06	61.01	149.051	C5H11NO2S	[M+H]+	DL-Methionine	Amino acids and derivatives	Amino acids and derivatives	59-51-8	3	1.58583e+06	1.31516e+06	1.51591e+06	1.28591e+06	1.49123e+06	1.4472e+06	C01733
MWS00275g	180.07	119.05	181.074	C9H11NO3	[M-H]-	DL-O-tyrosine	Amino acids and derivatives	Amino acids and derivatives	2370-61-8	2	74905.3	96920.4	85686.5	72579.1	74493.3	98143.9	-
MWSmce056	205.09	146.06	204.09	C11H12N2O2	[M+H]+	DL-Tryptophan	Amino acids and derivatives	Amino acids and derivatives	54-12-6	1	2.51573e+06	2.79583e+06	2.65292e+06	2.69654e+06	2.63449e+06	2.81065e+06	C00806
Lmsn000954	207.09	59.01	208.095	C8H16O6	[M-H]-	Dambonitol	Others	Saccharides	523-94-4	3	5862.73	12141.2	11685.3	12362.9	9695.59	14557	-
MWSmce526	161.09	143.08	160.085	C6H12N2O3	[M+H]+	Daminozide	Alkaloids	Alkaloids	1596-84-5	3	25360.2	29611.8	23168.8	38176.7	26905.2	40732.7	C10996
Wcfn008271	239.03	223.02	240.042	C14H8O4	[M-H]-	Danthron; 1,8-Dihydroxyanthraquinone	Quinones	Anthraquinone	117-10-2	3	1.12939e+07	1.56187e+07	1.12691e+07	1.81675e+07	1.77208e+07	1.85683e+07	C10312
mws1074	177.02	121.03	178.027	C9H6O4	[M-H]-	Daphnetin	Lignans and Coumarins	Coumarins	486-35-1	3	14097.4	13477.2	16733.8	19717.6	16008.8	15720	C03093
Cmyn001328	339.07	177.02	340.079	C15H16O9	[M-H]-	Daphnin*	Lignans and Coumarins	Coumarins	486-55-5	3	156566	190504	197649	147130	179371	172167	C01421
Wafn003987	525.257	333.192	466.241	C21H38O11	[M+CH3COOH-H]-	Decanoyl arabinosylglucoside	Others	Saccharides	-	3	70827.8	60911	79543.6	60186.1	73575	67307.9	-
MWSmce296	329.13	229.09	328.131	C19H20O5	[M+H]+	Decursin*	Lignans and Coumarins	Coumarins	5928-25-6	3	124290	124095	142345	121388	132455	127192	C09258
MWSslk022	329.14	229.1	328.131	C19H20O5	[M+H]+	Decursinol angelate*	Lignans and Coumarins	Coumarins	130848-06-5	3	136761	125124	78456.9	129902	130901	128672	-
Zaxn006641	299.2	299.2	300.209	C20H28O2	[M-H]-	Dehydroabietic acid	Terpenoids	Ditepenoids	1740-19-8	3	241624	192061	153004	177555	179275	188430	C12078
Jmwn006041	519.19	357.13	520.194	C26H32O11	[M-H]-	Dehydrodiconiferylalcohol-9'-O-glucoside	Lignans and Coumarins	Lignans	-	3	1.14512e+06	1.40908e+06	1.20538e+06	1.15367e+06	1.42261e+06	1.39655e+06	-
Lhjp111611	389.108	163.039	388.101	C16H20O11	[M+H]+	Dehydroscandoside	Terpenoids	Monoterpenoids	-	3	437280	418662	542790	642134	464107	475634	-
Lhjp111605	449.108	303.051	448.104	C18H24O11S	[M+H]+	Dehydroxypaederosidic Acid	Terpenoids	Monoterpenoids	-	3	171707	204584	202223	301914	239467	206351	-
Hmsn002272	327.11	165.05	328.116	C15H20O8	[M-H]-	Demethyl coniferin	Others	Alcohol compounds	-	3	674459	607089	561181	530577	548559	730083	-
MWSmce160	231.1	175.04	230.094	C14H14O3	[M+H]+	Demethylsuberosin	Lignans and Coumarins	Coumarins	21422-04-8	3	43177.1	46042.3	39134.1	43470.3	59871.7	32818.2	C18083
Lmcp101903	479.16	163.04	478.147	C23H26O11	[M+H]+	Desrhamnosylisoacteoside	Phenolic acids	Phenolic acids	-	2	279652	254246	227743	219645	227493	224025	-
Zmyn006050	305.18	191.15	306.183	C18H26O4	[M-H]-	Di-N-pentyl phthalate	Phenolic acids	Phenolic acids	131-18-0	3	40628.9	49711.8	42869.6	38043.4	42126.4	48869.4	-
Lmgn002250	677.17	191.06	678.18	C31H34O17	[M-H]-	Dicaffeoylquinic acid-O-glucoside	Phenolic acids	Phenolic acids	-	3	1.80094e+06	1.17775e+06	321322	677076	1.60809e+06	1.68009e+06	-
Lmgp003989	499.13	163.04	498.116	C25H22O11	[M+H]+	Dicaffeoylshikimic acid	Phenolic acids	Phenolic acids	-	1	2.08238e+06	2.49363e+06	2.01142e+06	2.25435e+06	2.25195e+06	2.53104e+06	-
MWS1751	161.081	87.0065	160.074	C7H12O4	[M+H]+	Diethyl malonate	Organic acids	Organic acids	105-53-3	3	37044.7	32175.4	28825.3	39663.7	31995	35919.7	-
Lhmp122104	533.15	177.05	532.137	C29H24O10	[M+H]+	Diferuloyl caffeic acid	Others	Others	-	3	4.51904e+06	5.28078e+06	5.46694e+06	4.82067e+06	5.36758e+06	4.9417e+06	-
Lmhp005872	455.22	177.05	454.21	C25H30N2O6	[M+H]+	Diferuloylcadaverine	Alkaloids	Phenolamine	-	3	366686	367561	275914	401896	409435	432604	-
Lmxn000380	415.15	89.02	416.153	C15H28O13	[M-H]-	Digalactosylglycerol	Others	Saccharides	-	3	110441	121490	98333.3	80833	108497	106058	-
Zmqp002999	390.19	261.14	389.18	C16H27N3O8	[M+H]+	Diglutamylleucine	Amino acids and derivatives	Amino acids and derivatives	-	3	68263.8	116163	83749.1	95030.8	103670	79516.5	-
Hmcp000233	158.15	140.14	157.147	C9H19NO	[M+H]+	Dihydro-N-methylisopelletierine	Alkaloids	Piperidine alkaloids	-	3	2.59648e+06	3.0402e+06	3.09914e+06	2.53316e+06	3.02432e+06	2.62467e+06	-
Lmmn000774	343.1	181.05	344.111	C15H20O9	[M-H]-	Dihydrocaffeoylglucose*	Phenolic acids	Phenolic acids	-	3	804276	948345	788742	772159	845293	809192	-
MWStz206	369.218	174.091	368.21	C22H28N2O3	[M+H]+	Dihydrocorynantheine	Alkaloids	Plumerane	4684-43-9	3	24856.6	15866.2	23393.5	17585	21071.8	35839.1	C16953
Lmyn003971	521.2	359.15	522.21	C26H34O11	[M-H]-	Dihydrodehydrodiconiferyl alcohol-4-O-glucoside*	Lignans and Coumarins	Lignans	-	3	218787	253527	222929	272967	266778	218331	-
MWS20182	195.07	136.05	196.074	C10H12O4	[M-H]-	Dihydroferulic Acid	Phenolic acids	Phenolic acids	1135-23-5	1	227124	264428	309419	246071	250807	244234	-
Hmcp000405	144.14	84.08	143.131	C8H17NO	[M+H]+	Dihydroisopelletierine	Alkaloids	Piperidine alkaloids	-	3	102691	72903.1	171962	68064.2	137587	105006	-
pme2710	211.13	167.14	212.141	C12H20O3	[M-H]-	Dihydrojasmonic acid	Organic acids	Organic acids	3572-64-3	3	48359	48533.8	39488.7	47235.8	44596.2	45015.9	-
Lhfp112915	177.05	131.05	176.047	C10H8O3	[M+H]+	Dihydrojuglone	Quinones	Quinones	-	3	214209	171996	207173	196519	178759	246723	-
Cmsp004086	303.09	229.08	302.079	C16H14O6	[M+H]+	Dihydrokaempferide	Flavonoids	Flavanonols	137225-59-3	3	417022	511025	527577	431757	442034	465302	-
Lmmn004625	449.11	287.06	450.116	C21H22O11	[M-H]-	Dihydrokaempferol-7-O-glucoside	Flavonoids	Flavanonols	-	3	370320	522761	419732	404177	403336	433491	-
HJN104	481.14	319.08	482.106	C21H22O13	[M-H]-	Dihydromyricetin-3-O-glucoside	Flavonoids	Flavanonols	-	3	5.13754e+06	6.44557e+06	5.93192e+06	5.37651e+06	5.91624e+06	6.1621e+06	-
Yajn003986	445.21	59.01	446.215	C21H34O10	[M-H]-	Dihydropenstemide	Terpenoids	Monoterpenoids	-	3	148585	165868	144243	150524	172431	147257	-
Wahln03557	387.13	207.06	388.136	C17H24O10	[M-H]-	Dihydrosinapic Acid glucoside	Phenolic acids	Phenolic acids	-	3	92109.7	67301.1	97295.6	61493.6	83108.8	85089.4	-
Wbmp003419	389.22	209.15	388.21	C19H32O8	[M+H]+	Dihydrovomifoliol-O-β-D-glucoside	Terpenoids	Sesquiterpenoids	-	3	93512.7	176242	160391	170040	147651	154732	-
Wafn003485	337.15	179.06	338.158	C14H26O9	[M-H]-	Dihydroxyoctanoic acid glucoside	Lipids	Free fatty acids	-	3	73051.1	98019.8	77311.9	75637.8	61861	75856.8	-
Lmxp011770	279.16	149.02	278.152	C16H22O4	[M+H]+	Diisobutyl phthalate*	Phenolic acids	Phenolic acids	84-69-5	1	1.28235e+07	1.29375e+07	1.25122e+07	1.27254e+07	1.27206e+07	1.22927e+07	C15205
MWSslk097	195.06	163.04	194.058	C10H10O4	[M+H]+	Dimethyl phthalate	Phenolic acids	Phenolic acids	131-11-3	3	933177	1.04938e+06	970160	888735	787399	942640	C11233
MWSmce618	271.1	239.07	270.089	C16H14O4	[M+H]+	Dimethyl[1,1'-biphenyl]-4,4'-dicarboxylate	Others	Others	792-74-5	3	72163.1	49126.3	55047	65268.6	56055.7	64721.2	-
Lhjp111615	443.154	147.042	442.147	C20H26O11	[M+H]+	Dimethylasperuloside	Terpenoids	Monoterpenoids	-	3	222094	180936	221203	279125	270229	220500	-
Wasyqn1008	295.1	59.01	296.111	C11H20O9	[M-H]-	Dimethylglyceric Acid Glucoside	Organic acids	Organic acids	-	1	66383.9	99628.4	96700.7	75148.5	70155.9	79213.8	-
Lmmn000806	131.03	87.05	132.042	C5H8O4	[M-H]-	Dimethylmalonic acid*	Organic acids	Organic acids	595-46-0	1	23166.5	29184.9	26033.3	14599.5	36208	26806.6	-
Hmdn005931	737.42	575.36	738.419	C39H62O13	[M-H]-	Diosgenin-3-O-glucosyl(1→4)galactoside (Funkioside C,Capsicoside B3)	Steroids	Steroidal saponins	60454-77-5	3	13447.9	18685.2	16572.5	16452.7	19667	14697.2	-
MWSHY0009	301.071	286.048	300.063	C16H12O6	[M+H]+	Diosmetin (5,7,3'-Trihydroxy-4'-methoxyflavone)*	Flavonoids	Flavones	520-34-3	3	546610	656922	559340	608105	598326	638469	C10038
pmp000579	463.12	301.07	462.116	C22H22O11	[M+H]+	Diosmetin-7-O-galactoside*	Flavonoids	Flavones	-	3	324588	461842	426860	366900	368939	459281	-
MWStz610	463.12	301.07	462.116	C22H22O11	[M+H]+	Diosmetin-7-O-glucoside*	Flavonoids	Flavones	20126-59-4	3	316408	405812	284393	441553	386867	433153	-
MWSHY0190	609.181	301.079	608.174	C28H32O15	[M+H]+	Diosmetin-7-O-rutinoside (Diosmin)	Flavonoids	Flavones	520-27-4	3	92024.2	80471.3	116081	130006	108096	111597	C10039
pmb2936	591.17	367.2	592.179	C28H32O14	[M-H]-	Disinapoyl glucoside	Phenolic acids	Phenolic acids	-	3	157144	159259	168944	195630	161244	140297	-
mws0930	329.25	285.26	330.256	C22H34O2	[M-H]-	Docosapentaenoic acid	Lipids	Free fatty acids	24880-45-3	3	188240	171640	154263	176430	167723	161508	C16513
mws0474	229.14	211.13	230.152	C12H22O4	[M-H]-	Dodecanedioic aicd	Lipids	Free fatty acids	693-23-2	1	30627.3	27871.1	28529.7	27708.1	30632.7	34715.6	C02678
pmb2640	199.17	199.17	200.178	C12H24O2	[M-H]-	Dodecanoic acid (Lauric acid)	Lipids	Free fatty acids	143-07-7	1	419079	398887	397336	373624	359734	379506	C02679
WaYn011749	265.15	96.96	266.165	C12H27O4P	[M-H]-	Dodecyl phosphate	Others	Others	2627-35-2	3	1.01011e+07	1.05682e+07	1.06531e+07	1.11543e+07	1.20505e+07	1.02404e+07	-
mws4002	154.09	137.06	153.079	C8H11NO2	[M+H]+	Dopamine	Alkaloids	Alkaloids	51-61-6	3	60238.8	35553.7	40275.7	48369.5	67505	58589.7	C03758
pme2237	181.07	101.02	182.079	C6H14O6	[M-H]-	Dulcitol*	Others	Saccharides	608-66-2	1	1.92079e+06	2.17811e+06	1.91558e+06	1.14941e+06	1.75923e+06	2.24347e+06	C01697
Lmcn009539	293.25	293.25	294.256	C19H34O2	[M-H]-	E,E,Z-1,3,12-Nonadecatriene-5,14-diol	Lipids	Free fatty acids	-	3	313798	300975	263503	310236	314411	288853	-
pmp000251	207.1	119.09	224.105	C12H16O4	[M-H2O+H]+	E-6,7-Dihydroxydihydroligustilide	Others	Lactones	-	3	3.67759e+07	3.96243e+07	3.55804e+07	4.09915e+07	3.85322e+07	3.88782e+07	-
Yajn003045	443.19	59.01	444.2	C21H32O10	[M-H]-	Ebuloside	Terpenoids	Monoterpenoids	-	3	68598	74415.2	60879.2	69890.9	69885.8	63159.3	-
mws1150	785.251	623.219	786.258	C35H46O20	[M-H]-	Echinacoside*	Phenolic acids	Phenolic acids	82854-37-3	3	189897	162708	137348	147066	180396	156190	C10450
Lwhp010633	160.08	115.05	159.068	C10H9NO	[M+H]+	Echinopsine	Alkaloids	Quinoline alkaloids	83-54-5	1	455240	480322	421676	467100	516384	457270	-
Lhjp120721	365.06	283.06	364.058	C20H12O7	[M+H]+	Edgeworin acetate	Lignans and Coumarins	Coumarins	-	3	2.87909e+07	2.85849e+07	2.82283e+07	2.92164e+07	2.97471e+07	2.73381e+07	-
pmn001610	307.26	307.26	308.272	C20H36O2	[M-H]-	Eicosadienoic acid*	Lipids	Free fatty acids	5598-38-9	3	549892	522687	560442	507714	542263	576250	C16525
pmn001606	309.28	309.28	310.287	C20H38O2	[M-H]-	Eicosenoic acid	Lipids	Free fatty acids	26764-41-0	3	809318	813122	728366	831058	809701	695943	C16526
mws0396	281.25	281.25	282.256	C18H34O2	[M-H]-	Elaidic Acid*	Lipids	Free fatty acids	112-79-8	2	2.64453e+06	2.72014e+06	2.72884e+06	2.68395e+06	2.63407e+06	2.57063e+06	C01712
Hmcp003852	223.21	207.03	222.198	C15H26O	[M+H]+	Elemol	Terpenoids	Sesquiterpenoids	639-99-6	3	932250	1.58659e+06	1.82257e+06	1.69568e+06	1.66426e+06	1.60419e+06	-
Lmsn002494	433.04	301	434.048	C19H14O12	[M-H]-	Ellagic acid-4-O-Xyloside	Tannins	Tannin	139163-18-1	3	23901.7	34694.2	36484.5	37149.6	52060.9	32751.1	-
mws1659	269.05	225.06	270.053	C15H10O5	[M-H]-	Emodin	Quinones	Anthraquinone	518-82-1	3	61262.7	85996.4	68062.5	71954	74068.4	80543.4	C10343
Lmmn004459	335.22	335.22	336.23	C20H32O4	[M-H]-	Ent-15-oxo-2β,16,19-trihydroxypimar-8(14)-ene	Terpenoids	Ditepenoids	-	3	362821	407314	368113	335415	366485	326050	-
HJN041	451.12	289.07	452.132	C21H24O11	[M-H]-	Epicatechin 3-glucoside	Flavonoids	Flavanols	-	3	401159	472248	430697	438331	419801	509131	-
HJN044	863.19	711.14	864.19	C45H36O18	[M-H]-	Epicatechin-(4β→8,2β→O→7)-epicatechin-(4β→8)-epicatechin	Flavonoids	Flavanols	-	3	25638.8	28159.3	17088.7	27813.6	18475.9	25003.3	-
Zmdn002049	451.13	289.07	452.132	C21H24O11	[M-H]-	Epicatechin-4'-O-β-D-glucopyranoside	Flavonoids	Flavanols	-	3	83040.3	78926.2	73961.5	89381.7	83868.9	81004	-
MWSHY0098	307.081	139.039	306.074	C15H14O7	[M+H]+	Epigallocatechin	Flavonoids	Flavanols	970-74-1	3	408495	379335	398869	453591	463276	448561	C12136
MWSHC20189	357.134	151.04	358.142	C20H22O6	[M-H]-	Epipinoresinol*	Lignans and Coumarins	Lignans	24404-50-0	3	71526.8	63993.4	65609	71060.2	71210.7	65126.6	-
MWSmce258	243.096	133.062	242.094	C15H14O3	[M+H]+	Equol; 7,4'-Homoisoflavane	Flavonoids	Other Flavonoids	94105-90-5	3	68622.2	67061.4	73847.3	79794.2	60771.8	90611.7	-
Xmzn007677	580.365	506.325	581.264	C33H35N5O5	[M-H]-	Ergotamine	Alkaloids	Plumerane	113-15-5	3	7.36826e+06	1.21066e+07	7.44569e+06	7.68716e+06	8.286e+06	5.79623e+06	C07544
Zbnn006442	287.05	135.04	288.063	C15H12O6	[M-H]-	Eriodictyol (5,7,3',4'-Tetrahydroxyflavanone)	Flavonoids	Flavanones	552-58-9	3	15949.1	15829.5	18915.5	14018.8	17515.8	13710.8	C05631
MWS20145	451.12	289.07	450.116	C21H22O11	[M+H]+	Eriodictyol-7-O-glucoside	Flavonoids	Flavanones	38965-51-4	3	44116.5	51492.6	68832.5	46357.1	68212.8	73303.9	-
Lmyn011997	337.31	337.31	338.318	C22H42O2	[M-H]-	Erucic acid	Lipids	Free fatty acids	112-86-7	3	2.34756e+06	2.83215e+06	2.61303e+06	3.13458e+06	3.08694e+06	2.93379e+06	C08316
mws1013	177.02	133.03	178.027	C9H6O4	[M-H]-	Esculetin (6,7-Dihydroxycoumarin)	Lignans and Coumarins	Coumarins	305-01-1	3	346508	478293	464049	390160	420210	416968	C09263
mws1015	339.072	177.019	340.079	C15H16O9	[M-H]-	Esculin (6,7-Dihydroxycoumarin-6-O-glucoside)*	Lignans and Coumarins	Coumarins	531-75-9	3	136322	197252	195602	152314	178021	174797	C09264
Lsmp010410	545.16	163.04	544.158	C27H28O12	[M+H]+	Ethyl 1,4-di-O-caffeoylquinate	Others	Others	-	2	382352	396794	351608	420279	367495	370577	-
MWSmce707	133.085	73.0645	132.079	C6H12O3	[M+H]+	Ethyl 3-hydroxybutyrate	Organic acids	Organic acids	5405-41-4	3	735935	723465	706109	737505	730880	647897	-
mws2184	207.07	135.04	208.074	C11H12O4	[M-H]-	Ethyl caffeate	Phenolic acids	Phenolic acids	102-37-4	1	1.53081e+06	1.688e+06	1.77104e+06	1.62502e+06	1.59088e+06	1.6311e+06	-
MWSmce177	221.09	133.03	222.089	C12H14O4	[M-H]-	Ethyl ferulate	Phenolic acids	Phenolic acids	4046-02-0	2	479989	474794	484448	474842	486047	485224	-
Lmmn013100	307.263	307.262	308.272	C20H36O2	[M-H]-	Ethyl linoleate*	Lipids	Free fatty acids	544-35-4	3	99278.2	72419.1	100662	95769	87490.6	86783.4	-
MWSmce712	165.09	91.05	164.084	C10H12O2	[M+H]+	Ethyl phenylacetate	Phenolic acids	Phenolic acids	101-97-3	3	146219	138849	66037.3	99892.4	99957.4	110122	-
pme3034	131.03	87.05	132.042	C5H8O4	[M-H]-	Ethylmalonic acid*	Organic acids	Organic acids	601-75-2	1	19218.6	28557.4	20978.4	22623.9	22645.9	20678.4	-
MWS1839	165.06	92.03	166.063	C9H10O3	[M-H]-	Ethylparaben	Phenolic acids	Phenolic acids	120-47-8	3	21779.3	25940.3	23741.4	23303	23207.8	22543.8	-
MWS1830	167.07	121.03	166.063	C9H10O3	[M+H]+	Ethylsalicylate	Phenolic acids	Phenolic acids	118-61-6	3	85457.8	91842.6	82737.2	98465.8	47908.2	63356.3	-
Lmqn009304	325.11	293.08	326.115	C19H18O5	[M-H]-	Eucalyptin (5-Hydroxy-7,4'-dimethoxy-6,8-dimethylflavone)	Flavonoids	Flavones	3122-88-1	3	138462	149959	135868	154599	155404	147043	-
pmn001371	549.198	387.146	550.205	C27H34O12	[M-H]-	Eucommin A	Lignans and Coumarins	Lignans	99633-12-2	3	69124.8	62848	89775.8	67199.6	77762.5	70423.5	C10560
Lhhp120823	193.08	105.07	192.079	C11H12O3	[M+H]+	Eugenyl formate	Others	Others	-	3	40739.6	152161	67866.4	100351	114102	88808.1	-
mws4017	285.22	285.22	286.23	C20H30O	[M-H]-	Ferruginol	Terpenoids	Ditepenoids	514-62-5	3	633167	604701	624247	577666	588962	614887	C09092
MWSmce083	207.07	133.03	208.074	C11H12O4	[M-H]-	Ferulic acid methyl ester	Phenolic acids	Phenolic acids	2309-07-1	1	611255	688963	651331	653781	636435	662661	-
mws0014	193.05	134.04	194.058	C10H10O4	[M-H]-	Ferulic acid*	Phenolic acids	Phenolic acids	537-98-4	1	4.3954e+06	3.74717e+06	3.7506e+06	1.4966e+06	2.65096e+06	3.08582e+06	C01494
Hmmn002544	355.1	193.05	356.111	C16H20O9	[M-H]-	Ferulic acid-4-O-glucoside	Phenolic acids	Phenolic acids	117405-51-3	3	4.04197e+07	4.0604e+07	4.3127e+07	4.51446e+07	4.3585e+07	4.42404e+07	-
Lhmp122103	693.2	177.05	692.195	C32H36O17	[M+H]+	Feruloyl caffeoyl quininyl glucoside	Others	Others	-	3	325578	450438	254837	305618	215404	178615	-
Lbhp011909	547.14	177.05	546.137	C26H26O13	[M+H]+	Feruloyl fraxin	Lignans and Coumarins	Coumarins	-	3	1.00828e+06	1.18357e+06	744869	1.58908e+06	1.20659e+06	1.28719e+06	-
pmp001245	280.15	221.08	280.154	C15H22NO4+	[M]+	Feruloylcholine	Alkaloids	Phenolamine	85927-25-9	2	65044	78356.6	63905.6	82884.8	90233.7	42822	-
Lmhn003074	309.06	193.05	310.069	C14H14O8	[M-H]-	Feruloylmalic acid	Phenolic acids	Phenolic acids	-	1	178611	275037	184957	262581	158809	261637	-
Lhjp111629	567.169	177.053	566.164	C26H30O14	[M+H]+	Feruloylscandoside	Terpenoids	Monoterpenoids	-	3	993619	919939	1.13622e+06	838184	1.21461e+06	1.09528e+06	-
MWSHY0077	287.055	137.022	286.048	C15H10O6	[M+H]+	Fisetin	Flavonoids	Flavonols	528-48-3	3	86224.2	90251.3	118718	101967	91370.3	73471.3	C10041
MWS5083	455.1	96.97	456.105	C17H21N4O9P	[M-H]-	Flavin Single Nucleotide(FMN)	Nucleotides and derivatives	Nucleotides and derivatives	6184-17-4	3	46389	39456.5	44225.9	34325.1	62839.4	53672.3	C00061
MWSHY0022	301.107	181.051	300.1	C17H16O5	[M+H]+	Flavokawain C	Flavonoids	Chalcones	37308-75-1	3	107955	118902	141696	112309	105872	120005	-
mws0430	440.13	311.09	441.14	C19H19N7O6	[M-H]-	Folic acid	Others	Vitamin	59-30-3	3	35974.3	26013.8	29040.7	19421.5	30843.5	30464.9	C00504
MWSslk147	219.005	121.028	217.998	C7H7O6P	[M+H]+	Fosfosal	Organic acids	Organic acids	6064-83-1	3	94355.3	91938.5	76783.3	70878.4	85695.8	82972.4	-
Wbmp003302	165.09	91.05	164.084	C10H12O2	[M+H]+	Frambinone	Others	Ketone compounds	-	3	290616	207308	346290	320643	216475	244403	-
mws1014	209.04	149.02	208.037	C10H8O5	[M+H]+	Fraxetin (7,8-Dihydroxy-6-methoxycoumarin)	Lignans and Coumarins	Coumarins	574-84-5	3	370663	380779	424869	394003	493815	449462	C09265
Lmbn001181	531.14	531.13	532.143	C22H28O15	[M-H]-	Fraxetin-7,8-di-O-glucoside	Lignans and Coumarins	Coumarins	-	3	1.08612e+06	1.07551e+06	1.03327e+06	894502	1.21472e+06	1.11739e+06	-
MWSmce025	369.09	207.03	370.09	C16H18O10	[M-H]-	Fraxetin-8-O-glucoside (Fraxin)	Lignans and Coumarins	Coumarins	524-30-1	1	1.41491e+06	1.33286e+06	1.33834e+06	1.77222e+06	1.48924e+06	1.45352e+06	C09266
mws0376	115	71.01	116.011	C4H4O4	[M-H]-	Fumaric acid	Organic acids	Organic acids	110-17-8	2	965596	1.15458e+06	1.19903e+06	1.21084e+06	1.15263e+06	1.27423e+06	C00122
mws1080	341.11	179.06	342.116	C12H22O11	[M-H]-	Galactinol	Others	Saccharides	3687-64-7	1	8.20317e+06	9.66936e+06	8.24071e+06	9.05323e+06	8.87107e+06	9.56668e+06	C01235
Hmbp001276	169.05	65.03	168.042	C8H8O4	[M+H]+	Gallacetophenone	Others	Ketone compounds	528-21-2	2	61372.7	88904.5	60789.3	80699.3	81403.5	59415.4	-
MWSmce051	365.06	319.05	364.058	C20H12O7	[M+H]+	Gallein	Phenolic acids	Phenolic acids	2103-64-2	3	7.40585e+06	7.62784e+06	7.55911e+06	6.60048e+06	7.8037e+06	7148033	-
Wasyqn2135	331.07	168.01	332.074	C13H16O10	[M-H]-	Gallic Acid 4-O-Glucoside	Phenolic acids	Phenolic acids	-	1	2.08451e+06	2.30353e+06	2.12796e+06	1.56623e+06	2.01609e+06	1.82367e+06	-
mws0024	169.01	125.02	170.022	C7H6O5	[M-H]-	Gallic acid	Phenolic acids	Phenolic acids	149-91-7	3	135797	271049	197429	214601	203123	248077	C01424
Smgp004660	383.19	160.07	382.189	C22H26N2O4	[M+H]+	Gambireine	Alkaloids	Plumerane	-	3	634890	698142	583136	816776	582296	667469	-
Smgp104888	385.21	160.07	384.205	C22H28N2O4	[M+H]+	Gambirine*	Alkaloids	Plumerane	29472-77-3	3	737195	825408	730492	670557	805442	664263	-
mws1173	271.061	243.066	272.068	C15H12O5	[M-H]-	Garbanzol	Flavonoids	Flavanonols	1226-22-8	3	56588.9	30278.2	37293.4	41335.4	61505.4	61157.2	C09751
Lajp006054	553.16	391.11	552.148	C25H28O14	[M+H]+	Gardenin E 5-glucoside	Flavonoids	Flavones	-	3	1.85286e+07	1.66936e+07	1.74483e+07	1.54701e+07	1.53985e+07	1.79558e+07	-
MWSmce434	403.12	127.04	404.132	C17H24O11	[M-H]-	Gardenoside	Terpenoids	Monoterpenoids	24512-62-7	3	18989.6	22855.8	17295.8	10590.5	14393.2	17380.4	C09779
pmp000426	367.202	144.082	366.194	C22H26N2O3	[M+H]+	Geissoschizine methyl ether	Alkaloids	Plumerane	60314-89-8	3	2.69709e+06	3.12025e+06	3.111e+06	2.80871e+06	4.37814e+06	2.27107e+06	-
Qazp003735	551.2	209.08	550.19	C23H34O15	[M+H]+	Genameside C	Terpenoids	Monoterpenoids	-	3	1.06394e+06	1.28921e+06	1.03413e+06	1.08175e+06	933352	1.06501e+06	-
Qazp003214	551.19	209.08	550.19	C23H34O15	[M+H]+	Genameside D	Terpenoids	Monoterpenoids	-	3	1.06543e+06	1.17261e+06	1.11542e+06	1.10464e+06	1.10277e+06	904665	-
pmp001059	521.187	209.081	520.179	C22H32O14	[M+H]+	Genipin-1-O-(2''-O-apiosyl)glucoside	Terpenoids	Monoterpenoids	-	3	52768.3	23870.6	44737.5	43323.1	40191.8	50157.5	-
mws1565	389.14	209.08	388.137	C17H24O10	[M+H]+	Geniposide	Terpenoids	Monoterpenoids	24512-63-8	3	304501	358174	363984	301147	244185	253522	C09781
mws1574	373.11	123.01	374.121	C16H22O10	[M-H]-	Geniposidic acid	Terpenoids	Monoterpenoids	27741-01-1	3	61548.5	74120.1	52984.2	53680.5	70551.9	82630.5	C11673
WaYn005157	491.118	315.072	492.127	C23H24O12	[M-H]-	Gentisic acid 2-O-(6''-O-Feruloyl)Glucoside	Phenolic acids	Phenolic acids	-	3	1.7339e+06	1.93165e+06	1.5142e+06	1.61629e+06	1.61416e+06	1.76677e+06	-
Walbn07011	279.12	153.13	280.131	C15H20O5	[M-H]-	Geranyl 2-Oxoglutaconic acid	Organic acids	Organic acids	-	1	335188	323095	328144	317769	330047	352782	-
Xmyn004302	449.24	259.063	450.21	C20H34O11	[M-H]-	Ginkgoside A	Phenolic acids	Phenolic acids	-	3	12303.8	14361.3		15972.3	18504	19842	-
Hmbp000679	184.097	134.06	183.089	C9H13NO3	[M+H]+	Ginkgotoxin (4-Methoxypyridoxine)	Others	Vitamin	1464-33-1	3	135095	177529	130574	138259	134977	142243	-
MW0149655	365.11	283.09	364.105	C12H20N4O7S1	[M+H]+	Gln-Cys-Asp	Amino acids and derivatives	Amino acids and derivatives	-	3	4.06681e+06	5.83898e+06	5.24444e+06	3.32384e+06	3.76897e+06	4.92343e+06	-
MWS201444	204.1	84.04	203.091	C7H13N3O4	[M+H]+	Gln-Gly	Amino acids and derivatives	Amino acids and derivatives	2650-65-9	3	1.67143e+07	1.51632e+07	1.62039e+07	1.66809e+07	1.82261e+07	1.58262e+07	-
MW0149796	343.2	163.04	342.19	C15H26N4O5	[M+H]+	Gln-Pro-Val	Amino acids and derivatives	Amino acids and derivatives	-	3	778342	611022	669931	651865	765918	662927	-
pmb1283	448.222	163.5	447.215	C18H33N5O6S	[M+H]+	Gln-Val-Val-Cys	Amino acids and derivatives	Amino acids and derivatives	-	3	617449	601776	645185	581804	657861	585589	-
Lcsn000385	260.09	131.05	261.096	C9H15N3O6	[M-H]-	Glu-Asn	Amino acids and derivatives	Amino acids and derivatives	36314-37-1	3	18515.9	12206.9	16922.3	16168.6	14213.5	21984.1	-
Zmmp002544	390.19	198.11	389.18	C16H27N3O8	[M+H]+	Glu-Glu-Leu	Amino acids and derivatives	Amino acids and derivatives	189080-99-7	3	93517	96528.7	80065.3	97702.2	92162.2	120909	-
Lcfn121066	422.16	164.07	423.164	C19H25N3O8	[M-H]-	Glu-Glu-Phe	Amino acids and derivatives	Amino acids and derivatives	-	1	16398.7	16029.3	10208.1	16530.4	12200.4	11239.4	-
MW0106904	285.12	239.12	284.112	C11H16N4O5	[M+H]+	Glu-His	Amino acids and derivatives	Amino acids and derivatives	21435-29-0	3	1.18967e+06	1.33348e+06	1.0964e+06	1.25508e+06	1.28968e+06	1.09785e+06	-
MW0150040	374.23	177.05	373.221	C17H31N3O6	[M+H]+	Glu-Ile-Leu	Amino acids and derivatives	Amino acids and derivatives	-	3	1.35576e+06	1.35448e+06	1.35899e+06	1.33888e+06	1.13806e+06	1.32354e+06	-
Zbqp002414	261.146	132.102	260.137	C11H20N2O5	[M+H]+	Glu-Leu	Amino acids and derivatives	Amino acids and derivatives	-	3	908021	994384	953665	1.00023e+06	1.01474e+06	952261	-
MWS201465	295.13	120.08	294.122	C14H18N2O5	[M+H]+	Glu-Phe*	Amino acids and derivatives	Amino acids and derivatives	20556-22-3	2	411208	351988	472559	314376	332736	250530	-
MWS20672	366.17	120.08	365.159	C17H23N3O6	[M+H]+	Glu-Phe-Ala	Amino acids and derivatives	Amino acids and derivatives	-	3	817257	845692	789223	824559	753003	847843	-
Zmmp004799	408.21	279.17	407.206	C20H29N3O6	[M+H]+	Glu-Phe-Leu	Amino acids and derivatives	Amino acids and derivatives	-	3	68519.9	57549.7	58345.6	59573.8	59108	55213.2	-
Zmmp003258	358.2	116.07	357.19	C16H27N3O6	[M+H]+	Glu-Pro-Leu	Amino acids and derivatives	Amino acids and derivatives	-	3	519966	531912	513599	529520	457878	569807	-
Zmmp002373	362.19	86.1	361.185	C15H27N3O7	[M+H]+	Glu-Thr-Leu	Amino acids and derivatives	Amino acids and derivatives	-	3	1.52921e+06	1.74735e+06	1.64287e+06	1.66349e+06	1.56522e+06	1.72409e+06	-
MW0150211	360.21	183.11	359.206	C16H29N3O6	[M+H]+	Glu-Val-Ile	Amino acids and derivatives	Amino acids and derivatives	-	3	2.58326e+06	3.36564e+06	3.19349e+06	3.10501e+06	2.78167e+06	3.06691e+06	-
Zmmp003747	360.21	231.17	359.206	C16H29N3O6	[M+H]+	Glu-Val-Leu	Amino acids and derivatives	Amino acids and derivatives	-	3	148250	176555	150933	116113	159937	172600	-
Lmmp000647	505.175	145.048	504.169	C18H32O16	[M+H]+	Glucan	Others	Saccharides	9041-22-9	3	84376.9	78326.1	65442.9	57209.5	81682.3	81675.7	-
pmb3081	288.997	96.9696	290.004	C6H11PO11	[M-H]-	Glucaric acid-1-Phosphate	Others	Saccharides	-	3	25727.8	27861.8	30951.3	41052.9	20202.2	43168.9	-
pme0534	195.05	75.01	196.058	C6H12O7	[M-H]-	Gluconic acid	Others	Saccharides	526-95-4	1	351709	335501	320166	319060	320756	362651	C00257
Wasn003258	293.12	131.07	294.132	C12H22O8	[M-H]-	Glucosyl 2-Hydroxy-4-Methylpentanoic Acid	Organic acids	Organic acids	-	2	1.86278e+06	2.10932e+06	2.1757e+06	2.15874e+06	2.06053e+06	2.07922e+06	-
Wasn003942	363.17	201.11	364.173	C16H28O9	[M-H]-	Glucosyl 6,9-dihydroxydec-4-enoic acid	Terpenoids	Monoterpenoids	-	3	188840	191745	182157	179838	198654	194847	-
Lakp003598	549.25	207.14	548.247	C25H40O13	[M+H]+	Glucosyl Corchoionoside C	Terpenoids	Monoterpenoids	-	3	463600	478946	442159	450628	467851	438984	-
Hmtn001302	299.078	137.024	300.084	C13H16O8	[M-H]-	Glucosyloxybenzoic acid*	Phenolic acids	Phenolic acids	-	1	1.88533e+06	2.20808e+06	2.00705e+06	1.96623e+06	1.82083e+06	1.95101e+06	-
MWSHC2022	359.1	197.05	360.106	C15H20O10	[M-H]-	Glucosyringic acid	Phenolic acids	Phenolic acids	33228-65-8	3	44865.4	74513.2	42505.9	56650.6	62468.3	51969.5	-
pme0243	131.035	87.0452	132.042	C5H8O4	[M-H]-	Glutaric acid*	Organic acids	Organic acids	110-94-1	1	146031	215056	177267	207096	195242	202419	C00489
Zmmp004497	246.134	182.117	245.126	C11H19NO5	[M+H]+	Glutaryl-L-Leucine	Amino acids and derivatives	Amino acids and derivatives	-	3	86039.5	83794.4	106610	65772.5	107986	102727	-
pme1086	306.08	143.05	307.084	C10H17N3O6S	[M-H]-	Glutathione reduced form	Amino acids and derivatives	Amino acids and derivatives	70-18-8	3	253154	251893	243051	264986	221417	256496	C00051
Lcsp001749	318.17	159.08	317.159	C13H23N3O6	[M+H]+	Gly-Glu-Leu	Amino acids and derivatives	Amino acids and derivatives	-	1	139649	135299	67904.3	85929.9	84377	111761	-
MW0150366	261.12	136.07	260.112	C9H16N4O5	[M+H]+	Gly-Gly-Gln	Amino acids and derivatives	Amino acids and derivatives	186787-32-6	3	1.3656e+06	1.41671e+06	1.3334e+06	1.39489e+06	1.38211e+06	1.32244e+06	-
mws5041	189.123	86.0964	188.116	C8H16N2O3	[M+H]+	Gly-Ile*	Amino acids and derivatives	Amino acids and derivatives	19461-38-2	1	7.15671e+06	7.52914e+06	7.6847e+06	7.41987e+06	7.84782e+06	7.48898e+06	-
Lcsp002329	288.19	143.12	287.185	C13H25N3O4	[M+H]+	Gly-Leu-Val	Amino acids and derivatives	Amino acids and derivatives	-	3	170888	252329	209281	209795	212855	248638	-
MWS4296	223.11	120.08	222.1	C11H14N2O3	[M+H]+	Gly-Phe*	Amino acids and derivatives	Amino acids and derivatives	3321-03-7	1	7.45776e+06	8.54901e+06	7.73417e+06	8.2606e+06	7.85405e+06	8.22873e+06	-
Lcsp001899	352.15	177.1	351.143	C16H21N3O6	[M+H]+	Gly-Phe-Glu	Amino acids and derivatives	Amino acids and derivatives	-	3	64392.4	63812.9	46741.8	64966.1	51046.6	85766.9	-
pme0124	173.092	116.071	172.085	C7H12N2O3	[M+H]+	Gly-Pro	Amino acids and derivatives	Amino acids and derivatives	704-15-4	3	1.75136e+06	1.42479e+06	1.65235e+06	1.48119e+06	1.69293e+06	1.66903e+06	-
MW0150489	234.11	105.07	233.101	C8H15N3O5	[M+H]+	Gly-Thr-Gly	Amino acids and derivatives	Amino acids and derivatives	85774-49-8	3	6.20731e+06	7.2154e+06	6.69195e+06	7.28351e+06	7.19025e+06	7.34606e+06	-
MW0107096	395.2	311.16	394.196	C17H26N6O5	[M+H]+	Gly-Tyr-Arg	Amino acids and derivatives	Amino acids and derivatives	-	3	4.02828e+06	5.03252e+06	4.40251e+06	3.94838e+06	4.68468e+06	4.17385e+06	-
Lcsp000959	246.14	72.08	245.138	C10H19N3O4	[M+H]+	Gly-Val-Ala	Amino acids and derivatives	Amino acids and derivatives	-	3	204463	166474	207439	123680	198300	172624	-
Lcsp002477	288.19	129.1	287.185	C13H25N3O4	[M+H]+	Gly-Val-Leu	Amino acids and derivatives	Amino acids and derivatives	-	1	185803	311770	244112	202498	153364	234862	-
Lcsp002875	322.18	129.1	321.169	C16H23N3O4	[M+H]+	Gly-Val-Phe	Amino acids and derivatives	Amino acids and derivatives	82985-55-5	3	82185.1	83342.5	92787.2	66208.9	50864.2	101400	-
Lmfp009701	353.27	261.22	352.261	C21H36O4	[M+H]+	Glycerol 9,11,13-octadecatrienoyl ester*	Lipids	Glycerol ester	-	1	1.96003e+06	1.97255e+06	1.88885e+06	2.13787e+06	2.06525e+06	2.00415e+06	-
Lcfn121113	171.01	78.96	172.014	C3H9O6P	[M-H]-	Glycerophosphoricacid	Others	Saccharides	20883	3	143941	148153	126650	136597	134901	158863	C03189
Walp013004	337.27	263.24	336.266	C21H36O3	[M+H]+	Glycidyl Linoleate	Lipids	Glycerol ester	24305-63-3	2	1.15858e+06	1.19059e+06	1.0924e+06	1.12207e+06	1.03017e+06	1.08466e+06	-
MWS4309	262.12	188.07	261.111	C13H15N3O3	[M+H]+	Glycyl-tryptophan	Amino acids and derivatives	Amino acids and derivatives	2390-74-1	3	3.39994e+06	3.63e+06	3.47922e+06	3.6725e+06	3.71045e+06	3.75021e+06	-
Xmyn008071	299.057	284.034	300.063	C16H12O6	[M-H]-	Gnetifolin B*	Flavonoids	Flavonols	140671-06-3	2	285210	384747	313474	364277	344746	366582	-
Lmmp003271	481.1	319.05	480.09	C21H20O13	[M+H]+	Gossypetin-8-O-glucoside	Flavonoids	Flavonols	652-78-8	3	174111	310222	264244	232473	233802	305796	C10051
Lmdn005433	493.06	317.03	494.07	C21H18O14	[M-H]-	Gossypetin-8-O-β-D-glucuronide	Flavonoids	Flavonols	-	3	93217.7	73195.3	80604.7	63519.9	77277.8	68989.9	-
Cmyp005063	425.176	147.044	424.173	C21H28O9	[M+H]+	Grandidentatin	Phenolic acids	Phenolic acids	15732-48-6	3	83666.6	63628.8	61256	54911.4	52973.3	67767.6	C10463
Lssp210340	335.22	281.19	334.214	C20H30O4	[M+H]+	Grayanotoxin VII	Terpenoids	Ditepenoids	-	3	43602.6	51258.7	71642.8	38536.8	30334.2	48236.5	-
Lman002731	341.09	135.04	342.095	C15H18O9	[M-H]-	Grevilloside F	Phenolic acids	Phenolic acids	1094004-50-8	3	1.90587e+06	2.19473e+06	2.35804e+06	2.16486e+06	2.07603e+06	1.88472e+06	-
Lazn002951	319.12	241.05	320.126	C17H20O6	[M-H]-	Guaiacylglycerol-β-Guaiacyl Ether	Lignans and Coumarins	Lignans	7382-59-4	3	3510.43	3409.06	3928	4858.18	5245.15	4567.76	-
pme1109	152.06	135.03	151.049	C5H5N5O	[M+H]+	Guanine	Nucleotides and derivatives	Nucleotides and derivatives	73-40-5	2	5.40154e+06	4.72944e+06	5.2962e+06	4.75353e+06	4.95632e+06	6.77566e+06	C00242
pme1178	284.1	152.06	283.092	C10H13N5O5	[M+H]+	Guanosine	Nucleotides and derivatives	Nucleotides and derivatives	118-00-3	1	5.13529e+06	5.82414e+06	5.61267e+06	5.22948e+06	5.41971e+06	5.62093e+06	C00387
mws0609	344.04	150.04	345.047	C10H12N5O7P	[M-H]-	Guanosine 3',5'-cyclic monophosphate	Nucleotides and derivatives	Nucleotides and derivatives	7665-99-8	1	159451	148379	165395	177314	157196	157601	C00942
pmb0998	364.07	152.06	363.058	C10H14N5O8P	[M+H]+	Guanosine 5'-monophosphate	Nucleotides and derivatives	Nucleotides and derivatives	85-32-5	3	412202	124073	236053	120347	301112	198009	C00144
Zbqp001884	294.14	166.09	293.138	C14H19N3O4	[M+H]+	H-Gly-ala-phe-OH	Amino acids and derivatives	Amino acids and derivatives	17922-87-1	3	406160	485626	413373	482942	514628	440236	-
Zmcn006984	911.5	749.45	912.508	C47H76O17	[M-H]-	Hederagenin-3-O-[β-D-glucosyl-(1-3)-a-L-rhamnosyl-(1-2)-a-L-arabinoside]	Terpenoids	Triterpene Saponin	-	3	32019.9	31140.5	23270.1	40663.6	30611.5	33673.3	-
Lsj214147	325.09	163.04	324.084	C15H16O8	[M+H]+	Hedycaffeoylglucoside A	Quinones	Anthraquinone	-	3	1.41014e+06	1.57013e+06	1.60008e+06	1.29011e+06	1.50141e+06	1.53708e+06	-
mws0362	269.25	269.24	270.256	C17H34O2	[M-H]-	Heptadecanoic acid	Lipids	Free fatty acids	506-12-7	3	459747	432140	523019	351128	335735	347960	-
Wasn003547	211.06	96.96	212.071	C7H16O5S	[M-H]-	Heptane-1,7-diol sulfate	Others	Others	-	1	1.21571e+07	1.36664e+07	1.4316e+07	1.15676e+07	1.27632e+07	1.37022e+07	-
MWStz543	305.11	203.04	304.095	C16H16O6	[M+H]+	Heraclenol	Lignans and Coumarins	Coumarins	31575-93-6	2	120612	215133	116858	109689	76949.9	114826	-
Zbhp004510	465.14	303.09	464.132	C22H24O11	[M+H]+	Hesperetin-3'-O-glucoside*	Flavonoids	Flavanones	-	2	486609	618363	665789	760004	518429	606025	-
pme1598	463.12	301.07	464.132	C22H24O11	[M-H]-	Hesperetin-5-O-glucoside	Flavonoids	Flavanones	69651-80-5	3	89604.9	122188	76513.7	91635.7	116037	126473	-
Lmzp002365	465.139	303.09	464.132	C22H24O11	[M+H]+	Hesperetin-7-O-glucoside*	Flavonoids	Flavanones	31712-49-9	2	112152	130469	99227.4	153330	111556	145238	C16422
MWSslk132	285.21	223.21	286.214	C16H30O4	[M-H]-	Hexadecanedioic acid	Lipids	Free fatty acids	505-54-4	1	443044	470911	456402	476386	468012	430259	C19615
Lcfn121098	614.33	452.28	615.338	C27H54NO12P	[M-H]-	HexosylLPE16:0	Lipids	LPE	-	2	49158.1	51647.8	46910.4	46869.2	65683.6	56756.8	-
Lcfn121095	638.33	476.28	639.338	C29H54NO12P	[M-H]-	HexosylLPE18:2	Lipids	LPE	-	1	150965	176100	153159	165174	149372	165178	-
Lmhn007953	213.11	169.12	214.12	C11H18O4	[M-H]-	Hexylitaconic acid	Organic acids	Organic acids	-	1	28931.4	35716.6	39267.4	25399.2	27287	29158.7	-
MW0150875	384.19	222.13	383.18	C16H25N5O6	[M+H]+	His-Asp-Leu	Amino acids and derivatives	Amino acids and derivatives	-	3	9.51109e+06	1.13204e+07	1.07995e+07	1.05304e+07	1.03753e+07	1.1138e+07	-
MWS201405	319.14	110.07	318.133	C15H18N4O4	[M+H]+	His-Tyr	Amino acids and derivatives	Amino acids and derivatives	35979-00-1	2	853131	844877	937361	837248	916636	907666	-
pmp000970	319.23	301.22	318.219	C20H30O3	[M+H]+	Hispanolone	Terpenoids	Ditepenoids	18676-07-8	3	6.45369e+06	7.24909e+06	6.71468e+06	6.43503e+06	6.39767e+06	6.95262e+06	-
MWSHY0069	301.07	286.049	300.063	C16H12O6	[M+H]+	Hispidulin (5,7,4'-Trihydroxy-6-methoxyflavone)*	Flavonoids	Flavones	1447-88-7	3	539077	630493	524897	560786	598816	555740	C10058
Hmgp002189	463.13	301.07	462.116	C22H22O11	[M+H]+	Hispidulin-7-O-glucoside(Homoplantaginin)*	Flavonoids	Flavones	17680-84-1	3	354301	456554	400727	374455	369078	483240	C17762
pme2122	112.09	95.06	111.08	C5H9N3	[M+H]+	Histamine	Alkaloids	Alkaloids	51-45-6	3	30013.9	26587.4	16258.8	13095.4	14679.2	13473.8	C00388
pma2987	142.1	124.09	141.09	C6H11N3O	[M+H]+	Histidinol	Alkaloids	Alkaloids	501-28-0	3	7.47275e+06	9.568e+06	7.29864e+06	7.65507e+06	7.56134e+06	6.59912e+06	C00860
Wayn001528	205.03	111.01	206.043	C7H10O7	[M-H]-	Homocitrate	Organic acids	Organic acids	13052-73-8	3	911280	1.15003e+06	968607	578000	660780	926753	C01251
Wahp004841	465.14	303.09	464.131	C22H24O11	[M+H]+	Homoeriodictyol 7-O-glucoside*	Flavonoids	Flavanones	-	2	554698	642679	517634	789672	504119	650374	-
pme1292	167.03	123.05	168.042	C8H8O4	[M-H]-	Homogentisic acid*	Phenolic acids	Phenolic acids	451-13-8	3	242607	242944	259604	206899	270864	249267	C00544
Lcfp039656	181.05	135.04	180.042	C9H8O4	[M+H]+	Homophthalicacid	Phenolic acids	Phenolic acids	89-51-0	1	1.54963e+06	1.68852e+06	1.67374e+06	2.12366e+06	1.94104e+06	1.94533e+06	-
MWS04447	130.09	70.07	129.079	C6H11NO2	[M+H]+	Homoproline	Amino acids and derivatives	Amino acids and derivatives	56879-46-0	3	595909	575899	577985	599034	611766	564511	-
Lcsn002137	261.01	181.05	262.015	C9H10O7S	[M-H]-	Homovanillic acid sulfate	Phenolic acids	Phenolic acids	38339-06-9	1	1.76896e+06	1.53396e+06	1.07478e+06	2.03124e+06	1.79422e+06	1.95067e+06	-
mws0117	181.05	122.04	182.058	C9H10O4	[M-H]-	Homovanillic acid; 4-Hydroxy-3-methoxyphenylacetic acid	Phenolic acids	Phenolic acids	306-08-1	3	13339.4	15060	16534.8	12597.4	11270.3	12408.8	C05582
pmb3056	355.1	121.03	356.111	C16H20O9	[M-H]-	Homovanilloylquinic acid	Phenolic acids	Phenolic acids	-	3	65448.9	71116.9	82188.1	86693.1	61018.1	58246.4	-
Wahln03197	389.15	167.07	390.152	C17H26O10	[M-H]-	Homovanillyl Alcohol Octopyranoside	Others	Alcohol compounds	-	3	17936.7	34831.9	40835.3	41532.8	49905.9	30223.3	-
Zadn009075	311.223	223.171	312.23	C18H32O4	[M-H]-	Hydroperoxylinoleic acid*	Lipids	Free fatty acids	34444-18-3	1	3.55871e+06	4.04571e+06	3.8161e+06	4.01738e+06	3.97891e+06	3.93679e+06	-
Lmbn007891	313.24	183.14	314.246	C18H34O4	[M-H]-	Hydroxy ricinoleic acid	Lipids	Free fatty acids	-	2	181232	194283	224778	203623	202807	215301	-
Wafn003070	371.1	209.05	372.106	C16H20O10	[M-H]-	Hydroxyferulic acid glucoside	Phenolic acids	Phenolic acids	-	3	500777	534819	502429	492419	488323	533603	-
mws1316	301.071	258.052	300.063	C16H12O6	[M+H]+	Hydroxygenkwanin	Flavonoids	Flavones	20243-59-8	3	169021	190160	137531	158036	155662	154556	-
Layp000971	332.13	152.07	331.127	C14H21NO8	[M+H]+	Hydroxymenisdaurin D	Alkaloids	Alkaloids	-	3	452068	484777	418322	521403	487905	454632	-
Lamp005631	309.1	177.05	308.089	C15H16O7	[M+H]+	Hydroxymethyl coumarin xyloside	Lignans and Coumarins	Coumarins	-	1	1.97575e+06	2.12823e+06	2.1318e+06	1.95291e+06	2.01455e+06	1.93034e+06	-
Wacn005438	477.269	161.045	418.257	C21H38O8	[M+CH3COOH-H]-	Hydroxypentadecenoic acid glucoside	Lipids	Free fatty acids	-	3	220735	254628	182466	194764	228367	222739	-
ML10172161	103.004	59.0136	104.011	C3H4O4	[M-H]-	Hydroxypyruvic acid*	Organic acids	Organic acids	1113-60-6	3	43238.6	25070.5	44281.9	20471.1	24221.6	20384.8	C00168
Lhjp111621	391.122	151.038	390.116	C16H22O11	[M+H]+	Hydroxysecologanic acid*	Terpenoids	Monoterpenoids	-	3	469188	397168	450223	376294	415166	503289	-
Lkmp122406	445.21	247.13	444.2	C21H32O10	[M+H]+	Hydroxysonchuside F	Terpenoids	Sesquiterpenoids	-	3	750766	902243	804667	746308	802744	792812	-
Wasyqp0972	121.07	77.04	120.058	C8H8O	[M+H]+	Hydroxystyrene	Others	Others	-	1	604783	515374	657659	466656	565987	502973	-
Wasn004567	447.094	181.018	448.101	C21H20O11	[M-H]-	Hydroxyterephthalic acid O-(6''-O-Benzoyl)Glucoside	Phenolic acids	Phenolic acids	-	3	24676.7	23517.3	14244.2	21721.1	21043.1	19759.2	-
MWS201398	219.1	86.06	218.09	C8H14N2O5	[M+H]+	Hyp-Ser	Amino acids and derivatives	Amino acids and derivatives	-	3	2.63043e+06	2.91649e+06	2.6868e+06	2.21092e+06	2.81551e+06	2.67293e+06	-
MWS201397	231.13	86.06	230.127	C10H18N2O4	[M+H]+	Hyp-Val	Amino acids and derivatives	Amino acids and derivatives	-	3	15090.7	13370.5	38520.2	30289.9	22842.5	56642.9	-
pme0033	137.05	119.04	136.038	C5H4N4O	[M+H]+	Hypoxanthine	Nucleotides and derivatives	Nucleotides and derivatives	68-94-0	3	608276	1.02557e+06	1.19271e+06	852106	1.05375e+06	673667	C00262
Cmyp003257	387.2	225.14	386.194	C19H30O8	[M+H]+	Icariside B1	Terpenoids	Terpene	109062-00-2	3	970581	1.0704e+06	940297	1.02172e+06	970355	1.04781e+06	-
Yacp008636	507.23	238.12	506.215	C26H34O10	[M+H]+	Icariside E4	Lignans and Coumarins	Lignans	126253-42-7	3	242056	273586	223174	238483	261961	230279	-
Hmln003754	521.205	359.149	522.21	C26H34O11	[M-H]-	Icariside E5	Others	Ketone compounds	126176-79-2	3	147456	150598	174718	154289	135786	229411	-
MW0151663	203.14	84.04	202.132	C9H18N2O3	[M+H]+	Ile-Ala*	Amino acids and derivatives	Amino acids and derivatives	24787-73-3	1	4.80059e+06	5.81778e+06	5.33228e+06	5.66178e+06	5.87442e+06	5.57401e+06	-
MWS201424	246.15	86.1	245.138	C10H19N3O4	[M+H]+	Ile-Asn	Amino acids and derivatives	Amino acids and derivatives	59652-59-4	3	1.00905e+06	1.08661e+06	963206	980756	1.02622e+06	1.00816e+06	-
MW0107430	247.13	86.1	246.122	C10H18N2O5	[M+H]+	Ile-Asp	Amino acids and derivatives	Amino acids and derivatives	-	3	378899	185511	390774	209454	332476	202894	-
Lcsp003010	360.21	86.1	359.206	C16H29N3O6	[M+H]+	Ile-Asp-Leu*	Amino acids and derivatives	Amino acids and derivatives	-	3	1.13426e+06	1.35022e+06	1.03291e+06	1.18973e+06	1.1772e+06	1.17454e+06	-
MW0107432	391.21	355.19	390.205	C15H30N6O4S1	[M+H]+	Ile-Cys-Arg	Amino acids and derivatives	Amino acids and derivatives	-	3	2.31731e+07	2.6899e+07	2.63638e+07	2.4499e+07	2.71211e+07	2.56654e+07	-
Lcsp002583	360.21	229.12	359.206	C16H29N3O6	[M+H]+	Ile-Glu-Val	Amino acids and derivatives	Amino acids and derivatives	-	1	430198	335079	341695	214967	273811	272077	-
Lcfp121207	302.21	143.12	301.2	C14H27N3O4	[M+H]+	Ile-Gly-Ile	Amino acids and derivatives	Amino acids and derivatives	-	2	1.37623e+06	1.89498e+06	1.71327e+06	1.80339e+06	1.7156e+06	1.70635e+06	-
Lcsp002690	288.19	86.1	287.185	C13H25N3O4	[M+H]+	Ile-Gly-Val	Amino acids and derivatives	Amino acids and derivatives	-	1	1.90418e+06	2.17672e+06	1.96035e+06	1.96589e+06	1.97646e+06	2.12059e+06	-
MWS201434	269.16	156.08	268.154	C12H20N4O3	[M+H]+	Ile-His	Amino acids and derivatives	Amino acids and derivatives	97284-12-3	2	177784	211259	254983	231525	269691	255178	-
Zbqp003125	279.17	86.1	278.163	C15H22N2O3	[M+H]+	Ile-Phe	Amino acids and derivatives	Amino acids and derivatives	-	1	3.24008e+06	4.01515e+06	3.69119e+06	3.52643e+06	3.76572e+06	3.79758e+06	-
MW0151542	336.19	120.08	335.185	C17H25N3O4	[M+H]+	Ile-Phe-Gly	Amino acids and derivatives	Amino acids and derivatives	-	3	2.71324e+06	3.31906e+06	2.96535e+06	3.04712e+06	3.04603e+06	3.04792e+06	-
MW0151557	357.21	163.04	356.206	C16H28N4O5	[M+H]+	Ile-Pro-Gln	Amino acids and derivatives	Amino acids and derivatives	-	3	501698	452998	378609	293202	353765	406750	-
MW0151591	336.16	86.1	335.151	C13H25N3O5S1	[M+H]+	Ile-Thr-Cys	Amino acids and derivatives	Amino acids and derivatives	-	3	1.38031e+06	1.6262e+06	1.64056e+06	1.53883e+06	1.62446e+06	1.65624e+06	-
Lcsp002647	318.18	86.1	317.174	C17H23N3O3	[M+H]+	Ile-Trp	Amino acids and derivatives	Amino acids and derivatives	13589-06-5	2	871762	958114	941432	841112	887280	958494	-
Lcsp001414	288.19	86.1	287.185	C13H25N3O4	[M+H]+	Ile-Val-Gly	Amino acids and derivatives	Amino acids and derivatives	-	2	551256	763944	535207	682268	613534	728564	-
MWSmce448	127.052	81.0449	126.043	C5H6N2O2	[M+H]+	Imidazol-1-yl-acetic acid*	Alkaloids	Alkaloids	22884-10-2	3	59426.1	69127.2	88572.1	113011	96984.1	111707	-
MWSmce118	127.05	81.04	126.043	C5H6N2O2	[M+H]+	Imidazole-4-Acetic Acid*	Alkaloids	Alkaloids	645-65-8	3	113528	44205.5	61034.8	107672	79823.6	97301.2	C02835
Wasyqp1413	203.08	157.08	202.074	C11H10N2O2	[M+H]+	Imino-Tryptophan	Amino acids and derivatives	Amino acids and derivatives	-	1	6.75627e+06	8.12414e+06	6.66653e+06	7.95895e+06	7.44077e+06	6.98654e+06	C21124
MWSslk045	263.08	235.09	262.074	C16H10N2O2	[M+H]+	Indigo*	Alkaloids	Plumerane	482-89-3	1	152767	176534	187663	216132	190928	214793	-
MWSslk031	263.08	219.09	262.074	C16H10N2O2	[M+H]+	Indirubin	Alkaloids	Plumerane	479-41-4	1	130340	162100	158948	169080	179412	174810	-
pmb1096	118.07	91.05	117.058	C8H7N	[M+H]+	Indole	Alkaloids	Plumerane	120-72-9	1	9.4046e+06	1.06815e+07	1.0335e+07	9.46519e+06	9.90995e+06	9.51781e+06	C00463
pme1651	176.07	130.07	175.063	C10H9NO2	[M+H]+	Indole-3-acetic acid (IAA)	Alkaloids	Plumerane	87-51-4	3	80752.9	93117.6	107709	95531.3	110051	102522	C00954
Lcsn004327	289.08	88.04	290.09	C14H14N2O5	[M-H]-	Indole-3-acetyl-L-aspartic acid	Alkaloids	Plumerane	2456-73-7	3	81558.2	101038	84275.4	93067.4	101977	78684.8	C22224
pme0224	202.09	158.1	203.095	C12H13NO2	[M-H]-	Indole-3-butyric acid	Alkaloids	Plumerane	133-32-4	3	23013.7	24168.1	28934.4	49773.6	21018.7	28849.1	C11284
mws0103	146.06	91.05	145.053	C9H7NO	[M+H]+	Indole-3-carboxaldehyde	Alkaloids	Plumerane	487-89-8	3	132762	189987	192050	233842	223416	207141	C08493
mws1417	160.04	116.05	161.048	C9H7NO2	[M-H]-	Indole-3-carboxylic acid*	Alkaloids	Plumerane	771-50-6	3	51342.8	44000.3	47391.2	46036	40536.3	44588.6	C19837
Lmrn003201	204.07	158.06	205.074	C11H11NO3	[M-H]-	Indole-3-lactic acid	Alkaloids	Plumerane	1821-52-9	3	23168.9	20000.7	30764.5	28746.7	32320.3	21425.7	C02043
mws0102	160.04	116.05	161.048	C9H7NO2	[M-H]-	Indole-5-carboxylic acid*	Alkaloids	Plumerane	1670-81-1	3	711720	791160	700654	739093	803082	783502	-
Lcfp036464	120.08	103.05	119.073	C8H9N	[M+H]+	Indoline	Alkaloids	Plumerane	496-15-1	1	909788	1.07482e+06	930358	922213	924018	983385	-
pme1119	269.09	137.05	268.081	C10H12N4O5	[M+H]+	Inosine	Nucleotides and derivatives	Nucleotides and derivatives	58-63-9	3	1.29315e+06	1.32342e+06	1.33329e+06	1.3227e+06	1.25322e+06	1.54988e+06	C00294
pmb0532	349.05	137.05	348.047	C10H13N4O8P	[M+H]+	Inosine 5'-monophosphate	Nucleotides and derivatives	Nucleotides and derivatives	131-99-7	3	4.24586e+06	3.1899e+06	4.11732e+06	2.49637e+06	3.83576e+06	2.98613e+06	C00130
Hmln000297	179.05	59.01	180.063	C6H12O6	[M-H]-	Inositol*	Others	Saccharides	87-89-8	1	273997	262332	229149	251509	256239	286393	C00137
MWStz480	336.18	120.08	335.173	C18H25NO5	[M+H]+	Integerrimine	Alkaloids	Pyrrole alkaloids	480-79-5	3	2.71722e+06	3.214e+06	3.19729e+06	3.14488e+06	2.98173e+06	3.21201e+06	C10328
Lmjp004581	599.4	337.21	598.387	C36H54O7	[M+H]+	Integracide H	Terpenoids	Triterpene	-	3	40958.8	36533.2	82080.1	43433.6	48783.1	66447.9	-
Wahln11065	205.16	189.13	206.167	C14H22O	[M-H]-	Irone	Terpenoids	Monoterpenoids	-	3	1.7256e+06	1.66023e+06	1.85452e+06	1.61018e+06	1.61767e+06	1.63026e+06	-
Hmgp001944	625.214	163.03	624.205	C29H36O15	[M+H]+	Isoacteoside	Phenolic acids	Phenolic acids	61303-13-7	3	1.10707e+06	1.10179e+06	1.00788e+06	1.2266e+06	1.25737e+06	1.25207e+06	-
Wasn001007	337.077	277.057	338.085	C12H18O11	[M-H]-	Isoascorbic acid 2-O-glucoside	Others	Vitamin	-	3	153374	112793	111537	121177	110608	123795	-
pmn001382	515.12	353.09	516.127	C25H24O12	[M-H]-	Isochlorogenic acid A	Phenolic acids	Phenolic acids	2450-53-5	1	12666054	1.48587e+07	1.17455e+07	1.12975e+07	1.43072e+07	1.41148e+07	-
Li512115	515.12	353.09	516.127	C25H24O12	[M-H]-	Isochlorogenic acid B	Phenolic acids	Phenolic acids	14534-61-3	1	8.52509e+07	8.11134e+07	8.72212e+07	8.84568e+07	7.84017e+07	8.92119e+07	C10468
MWSmce328	517.13	163.04	516.127	C25H24O12	[M+H]+	Isochlorogenic acid C	Phenolic acids	Phenolic acids	57378-72-0	1	1.24975e+06	1.9209e+06	1.33106e+06	1.86724e+06	1.66925e+06	1.82748e+06	-
Zmyn000453	191.02	111.01	192.027	C6H8O7	[M-H]-	Isocitric Acid	Organic acids	Organic acids	320-77-4	1	2.44585e+07	1.73059e+07	2.36095e+07	2.25957e+07	2.34809e+07	2.82176e+07	C00311
Wayn000918	515.124	111.009	516.133	C18H28O17	[M-H]-	Isocitric acid-1-O-diglucoside	Organic acids	Organic acids	-	3	112278	76308	90658.5	95057.3	74062.8	90118	-
MWSmce011	383.19	160.075	382.189	C22H26N2O4	[M+H]+	Isocorynoxeine	Alkaloids	Plumerane	51014-29-0	3	586436	658907	481920	568753	610318	485831	-
Hmgp002033	623.2	163.03	622.19	C29H34O15	[M+H]+	Isocrenatoside	Phenolic acids	Phenolic acids	221895-09-6	3	1.26212e+06	1.37509e+06	1.40067e+06	769526	1.38674e+06	1.59636e+06	-
MWS5173	112.05	70.03	111.043	C4H5N3O	[M+H]+	Isocytosine	Nucleotides and derivatives	Nucleotides and derivatives	108-53-2	3	171301	157332	173040	143929	162468	156128	-
pme0422	193.051	134.037	194.058	C10H10O4	[M-H]-	Isoferulic Acid*	Phenolic acids	Phenolic acids	25522-33-2	1	4.46982e+06	3.90882e+06	3.98246e+06	1.58617e+06	2.62776e+06	3.03963e+06	C10470
Lmjp003090	385.113	223.06	384.106	C17H20O10	[M+H]+	Isofraxidin-7-O-glucoside	Lignans and Coumarins	Coumarins	483-91-0	3	1.12595e+06	1.33776e+06	1.26882e+06	1.30367e+06	1.41956e+06	1.35052e+06	-
Smgp204888	385.21	160.07	384.205	C22H28N2O4	[M+H]+	Isogambirine*	Alkaloids	Plumerane	-	3	661708	778337	611704	723210	667359	783254	-
pme0183	152.06	135.03	151.049	C5H5N5O	[M+H]+	Isoguanine	Nucleotides and derivatives	Nucleotides and derivatives	3373-53-3	3	1.26433e+06	1.53411e+06	1.21219e+06	1.74221e+06	1.37685e+06	1.32841e+06	-
Lmmn002274	521.2	359.15	522.21	C26H34O11	[M-H]-	Isolariciresinol-9'-O-glucoside*	Lignans and Coumarins	Lignans	63358-12-3	3	227612	265200	203657	258358	253839	278638	-
pmn001643	505.21	359.15	506.215	C26H34O10	[M-H]-	Isolariciresinol-9'-O-rhamnoside (Aviculin)	Lignans and Coumarins	Lignans	156765-33-2	3	59822.9	61260.2	51513	68996.9	61212.8	60093.6	-
Cmsn002371	491.19	327.12	492.2	C25H32O10	[M-H]-	Isolariciresinol-9-O-xyloside	Lignans and Coumarins	Lignans	-	3	79452.6	79115.9	71705.6	85538.7	80923.1	84899.5	-
Zmmp004279	374.23	243.13	373.221	C17H31N3O6	[M+H]+	Isoleucyl-Glutamyl-Leucine	Amino acids and derivatives	Amino acids and derivatives	-	3	1.26877e+06	1.2589e+06	1.27323e+06	1.08582e+06	1.16697e+06	1.22137e+06	-
MWStz333	197.12	133.1	196.11	C11H16O3	[M+H]+	Isololiolide	Terpenoids	Terpene	38274-00-9	3	366729	443640	379292	427672	395508	450402	-
mws5038	341.109	89.0249	342.116	C12H22O11	[M-H]-	Isomaltulose*	Others	Saccharides	13718-94-0	1	1.01609e+06	1.16832e+06	1.20146e+06	1.13553e+06	1.04231e+06	1.18608e+06	C01742
MWSHY0185	423.092	303.05	422.085	C19H18O11	[M+H]+	Isomangiferin*	Flavonoids	Other Flavonoids	24699-16-9	3	1.99265e+06	1.92137e+06	1.85327e+06	2.03021e+06	1.81638e+06	2.01747e+06	C16979
MWSmce039	124.04	80.05	123.032	C6H5NO2	[M+H]+	Isonicotinic acid	Others	Vitamin	55-22-1	3	277083	243514	310767	256347	240403	232297	C07446
pmb0667	757.197	177.1	756.19	C36H36O18	[M+H]+	Isoorientin-7-O-(6''-feruloyl)arabinoside	Flavonoids	Flavones	-	3	2.19457e+06	2.43312e+06	1.55992e+06	1.59756e+06	2.0319e+06	1.89156e+06	-
Lcfp056369	366.18	204.12	365.17	C16H23N5O5	[M+H]+	Isopentenyladenine9-Glucoside	Nucleotides and derivatives	Nucleotides and derivatives	83087-94-9	1	996645	1.16134e+06	1.03238e+06	1.00811e+06	1.18086e+06	1.12033e+06	-
Lcfn001652	411.19	249.13	412.195	C17H32O11	[M-H]-	Isopentylgentiobioside	Others	Saccharides	178275-89-3	2	2.44309e+06	2.53129e+06	2.7645e+06	2.95065e+06	2.4502e+06	2.4474e+06	-
Zaxn006988	301.22	301.22	302.225	C20H30O2	[M-H]-	Isopimaric acid*	Terpenoids	Ditepenoids	5835-26-7	3	173696	188217	202666	156627	173117	156907	C09118
MWSmce709	130.06	103.05	129.058	C9H7N	[M+H]+	Isoquinoline	Alkaloids	Isoquinoline alkaloids	119-65-3	2	2.40454e+06	2.36601e+06	2.45394e+06	2.18593e+06	2.4306e+06	2.73771e+06	C06323
Hmcp002316	449.106	317.06	448.101	C21H20O11	[M+H]+	Isorhamnetin-3-O-arabinoside	Flavonoids	Flavonols	-	3	457807	473897	871584	554542	673390	482997	-
Hmcp002207	479.118	317.06	478.111	C22H22O12	[M+H]+	Isorhamnetin-7-O-glucoside (Brassicin)*	Flavonoids	Flavonols	6743-96-0	3	430459	402273	384291	508696	470262	472715	-
Smgp004569	371.19	160.07	370.189	C21H26N2O4	[M+H]+	Isorhynchophyllic acid	Alkaloids	Plumerane	144525-05-3	3	38929.8	64577.4	41518.9	38918.9	39327.2	54355	-
Smgp304888	385.21	160.07	384.205	C22H28N2O4	[M+H]+	Isorhynchophylline*	Alkaloids	Plumerane	6859-01-4	3	781971	797966	779771	599814	746404	712772	C16980
MWSHY0165	449.14	287.1	448.137	C22H24O10	[M+H]+	Isosakuranetin-7-O-glucoside (Isosakuranin)	Flavonoids	Flavanones	491-69-0	3	132620	133766	129544	67787.2	96699.8	166284	-
mws1292	565.16	409.09	564.148	C26H28O14	[M+H]+	Isoschaftoside	Flavonoids	Flavones	52012-29-0	3	402226	388310	410221	347890	393392	408316	-
Zbsp004940	193.05	133.03	192.042	C10H8O4	[M+H]+	Isoscopoletin (6-Hydroxy-7-Methoxycoumarin)*	Lignans and Coumarins	Coumarins	776-86-3	1	1.21564e+06	1.60725e+06	1.50609e+06	1.26337e+06	1.49342e+06	1.53422e+06	C18079
Lmsp002548	355.1	163.04	354.095	C16H18O9	[M+H]+	Isoscopoletin-β-D-glucoside	Lignans and Coumarins	Coumarins	20186-29-2	1	1.67298e+06	1.79047e+06	2.14852e+06	1.7469e+06	1.46843e+06	1.3598e+06	-
MWSmce040	153.05	65.04	152.047	C8H8O3	[M+H]+	Isovanillin	Others	Aldehyde compounds	621-59-0	3	778564	891652	815410	1.15284e+06	850496	882157	-
Zbzp004819	801.22	433.11	800.216	C38H40O19	[M+H]+	Isovitexin-7-O-(6''-sinapoyl)glucoside	Flavonoids	Flavones	-	3	82088.2	102740	117680	109066	87021.3	80828.2	-
Hmmp003156	595.16	313.07	594.159	C27H30O15	[M+H]+	Isovitexin-7-O-glucoside(Saponarin)	Flavonoids	Flavones	20310-89-8	3	60128	51409.6	88348.6	79108.3	68350.1	50771	C08064
mws0981	178.04	136.02	179.044	C6H5N5O2	[M-H]-	Isoxanthopterin	Nucleotides and derivatives	Nucleotides and derivatives	529-69-1	3	52693.7	72210.1	67273.9	66337.8	66585.3	59455.9	C03975
Zmgn000217	129.02	85.03	130.027	C5H6O4	[M-H]-	Itaconic acid	Organic acids	Organic acids	97-65-4	3	53457.7	38902.4	33293.6	53778.5	52686.6	55459	C00490
pmp001048	361.149	199.095	360.142	C16H24O9	[M+H]+	Ixoroside	Terpenoids	Monoterpenoids	58514-30-0	3	1.34857e+06	1.37275e+06	1.50861e+06	1.52152e+06	1.40994e+06	1.45653e+06	-
pmp001046	347.17	167.106	346.163	C16H26O8	[M+H]+	Jasminoside B	Terpenoids	Monoterpenoids	214125-04-9	3	55235.5	62653.6	45257.7	55776.6	85976	91094.6	-
pmp001044	329.159	167.105	328.152	C16H24O7	[M+H]+	Jasminoside C	Terpenoids	Monoterpenoids	214125-05-0	3	63237.7	34589.3	47817.8	47871.9	41585.7	17383	-
Hmqn002491	477.23	221.06	478.241	C22H38O11	[M-H]-	Jasminoside N	Terpenoids	Monoterpenoids	1231710-13-6	3	79205.4	67823.4	57660.3	66706.6	63347.7	63835	-
Wbkn004126	523.22	361.16	524.226	C26H36O11	[M-H]-	Javanicolide C	Terpenoids	Ditepenoids	-	3	628126	871998	684734	700475	814467	752198	-
Zmlp006917	331.19	295.17	330.183	C20H26O4	[M+H]+	Jolkinolide B	Terpenoids	Ditepenoids	37905-08-1	3	1.88452e+06	2.03421e+06	2.04488e+06	2.14733e+06	2.19146e+06	2.1182e+06	-
Zbjn008081	299.06	284.04	300.063	C16H12O6	[M-H]-	Kaempferide (3,5,7-Trihydroxy-4'-methoxyflavone)*	Flavonoids	Flavonols	491-54-3	2	138173	137801	160517	173941	173793	149602	C10098
MWSHY0051	287.055	153.018	286.048	C15H10O6	[M+H]+	Kaempferol (3,5,7,4'-Tetrahydroxyflavone)	Flavonoids	Flavonols	520-18-3	3	105472	90009.6	92870.4	95422.1	100983	105426	C05903
Lmbp002592	611.16	287.05	610.153	C27H30O16	[M+H]+	Kaempferol-3,7-O-diglucoside	Flavonoids	Flavonols	25615-14-9	3	99287.9	134529	84987.8	144041	141253	142551	-
Lmdp004892	535.11	287.05	534.101	C24H22O14	[M+H]+	Kaempferol-3-O-(6''-malonyl)galactoside	Flavonoids	Flavonols	-	3	145025	112241	82398.7	47997.7	65561.3	70019.5	-
Lmbp003668	419.1	287.05	418.09	C20H18O10	[M+H]+	Kaempferol-3-O-arabinoside	Flavonoids	Flavonols	-	3	96042.7	101711	105424	68003.7	64237.7	76366.7	-
mws0913	447.09	285.04	448.101	C21H20O11	[M-H]-	Kaempferol-3-O-galactoside (Trifolin)*	Flavonoids	Flavonols	23627-87-4	3	153893	186449	184010	213964	213505	211472	C12626
MWSHY0136	449.108	287.055	448.101	C21H20O11	[M+H]+	Kaempferol-3-O-glucoside (Astragalin)*	Flavonoids	Flavonols	480-10-4	3	1.55893e+06	2.20178e+06	1.84072e+06	2.05889e+06	1.97876e+06	2.14947e+06	C12249
mws0919	431.1	285.04	432.106	C21H20O10	[M-H]-	Kaempferol-3-O-rhamnoside (Afzelin)(Kaempferin)	Flavonoids	Flavonols	482-39-3	3	103871	117565	96060.5	105546	102049	95885.9	C16911
Zbjn004215	609.15	285.04	610.154	C27H30O16	[M-H]-	Kaempferol-3-O-sophoroside	Flavonoids	Flavonols	19895-95-5	2	19492	29203.4	23375	24803.7	19577.9	40331.1	C12634
Lmfn005486	365	285.04	366.005	C15H10O9S	[M-H]-	Kaempferol-3-O-sulfonate	Flavonoids	Flavonols	-	3	28163.6	37401.4	39222.8	35260.4	37239.9	33392.7	-
Xmyp005654	449.11	287.06	448.101	C21H20O11	[M+H]+	Kaempferol-4'-O-glucoside*	Flavonoids	Flavonols	52222-74-9	3	2.24048e+06	2.46036e+06	2.20267e+06	2.16365e+06	2.17124e+06	2.37878e+06	-
mws0089	447.09	285.04	448.101	C21H20O11	[M-H]-	Kaempferol-7-O-glucoside*	Flavonoids	Flavonols	16290-07-6	3	178951	187553	173419	202035	219880	209576	-
pme0321	431.1	285.04	432.106	C21H20O10	[M-H]-	Kaempferol-7-O-rhamnoside	Flavonoids	Flavonols	20196-89-8	3	109979	107862	108179	106166	95359.8	123945	-
Wcgp009524	307.26	81.07	306.256	C20H34O2	[M+H]+	Kaurane-16,17-diol	Terpenoids	Ditepenoids	16836-31-0	3	491063	536794	559451	551077	508504	508899	-
MWSslk208	301.22	301.22	302.225	C20H30O2	[M-H]-	Kaurenoic Acid*	Terpenoids	Ditepenoids	6730-83-2	3	223734	184476	208217	180904	157523	160650	C11874
Lcsn000415	267.07	59.01	268.079	C9H16O9	[M-H]-	Keto-Deoxy-Nonulonic acid	Lipids	Free fatty acids	153666-19-4	1	75321.4	87342.1	84836.5	68685.9	84102.6	86090.9	C20934
Wbmp006183	223.17	81.07	222.162	C14H22O2	[M+H]+	Kobusone	Terpenoids	Sesquiterpenoids	-	3	132663	136923	102588	170677	109938	167024	-
pmn001732	529.303	365.251	530.31	C28H42N4O6	[M-H]-	Kukoamine B	Alkaloids	Phenolamine	164991-67-7	3	20128.6	22187.6	20095.5	18521.2	17566.5	18263.1	C17616
MW0110277	338.18	175.12	337.175	C15H23N5O4	[M+H]+	Kyotorphin	Amino acids and derivatives	Amino acids and derivatives	70904-56-2	3	1.55822e+06	1.90741e+06	1.74647e+06	1.61363e+06	1.70832e+06	1.85538e+06	C02993
mws4176	237.12	120.09	236.116	C12H16N2O3	[M+H]+	L-Alanyl-L-Phenylalanine	Amino acids and derivatives	Amino acids and derivatives	3061-90-3	3	3.04759e+06	3.34029e+06	3.25194e+06	3.15901e+06	3.42378e+06	3.29359e+06	-
mws5037	203.14	86.1	202.132	C9H18N2O3	[M+H]+	L-Alanyl-L-leucine	Amino acids and derivatives	Amino acids and derivatives	3303-34-2	3	3.56091e+06	4.01595e+06	3.60846e+06	3.83701e+06	3.96845e+06	3.85805e+06	-
pme2679	132.1	86.1	131.095	C6H13NO2	[M+H]+	L-Allo-isoleucine	Amino acids and derivatives	Amino acids and derivatives	1509-34-8	3	9.90051e+06	1.27061e+07	6.99279e+06	1.84141e+07	1.71839e+07	1.45297e+07	C21096
mws0260	175.12	116.07	174.112	C6H14N4O2	[M+H]+	L-Arginine	Amino acids and derivatives	Amino acids and derivatives	74-79-3	1	1.05523e+06	1.01858e+06	1.13449e+06	1.25234e+06	1.22723e+06	1.14335e+06	C00062
Hmfn000531	175.02	87.01	176.032	C6H8O6	[M-H]-	L-Ascorbic acid (Vitamin C)	Others	Vitamin	50-81-7	3	48076.9	50293.6	60882.2	53362.9	38674.1	55734.3	C00072
mws0219	132.03	88.04	133.037	C4H7NO4	[M-H]-	L-Aspartic Acid*	Amino acids and derivatives	Amino acids and derivatives	56-84-8	1	925388	1.0425e+06	1.15174e+06	1.09514e+06	993479	1.05626e+06	C00049
pmb0464	458.15	116.034	457.143	C16H27NO14	[M+H]+	L-Aspartic acid-O-diglucoside	Amino acids and derivatives	Amino acids and derivatives	-	3	1.19484e+06	817390	913713	1.01854e+06	1.19001e+06	1.15878e+06	-
mws0629	281.11	166.09	280.106	C13H16N2O5	[M+H]+	L-Aspartyl-L-Phenylalanine	Amino acids and derivatives	Amino acids and derivatives	13433-09-5	3	9.25101e+06	9.83006e+06	8.89976e+06	9.5316e+06	9.55166e+06	1.00492e+07	-
pmb2826	147.03	87.01	148.037	C5H8O5	[M-H]-	L-Citramalic acid	Organic acids	Organic acids	6236-09-5	1	339825	203108	321533	299474	235228	258276	C02614
pme0008	176.1	113.07	175.096	C6H13N3O3	[M+H]+	L-Citrulline	Amino acids and derivatives	Amino acids and derivatives	372-75-8	3	966654	860829	996240	729453	939146	796650	C00327
Hmsp000364	144.1	98.09	143.095	C7H13NO2	[M+H]+	L-Cyclopentylglycine	Amino acids and derivatives	Amino acids and derivatives	2521-84-8	1	399660	410162	385499	399715	396817	435564	-
mws0875	179.05	76.02	178.041	C5H10N2O3S	[M+H]+	L-Cysteinyl-L-glycine	Amino acids and derivatives	Amino acids and derivatives	19246-18-5	3	170764	225010	204834	106477	174465	214858	C01419
mws0221	241.03	151.98	240.024	C6H12N2O4S2	[M+H]+	L-Cystine	Amino acids and derivatives	Amino acids and derivatives	56-89-3	3	832448	989061	865429	927357	1.06728e+06	940835	C00491
pme0278	191.1	128.07	190.095	C7H14N2O4	[M+H]+	L-Diaminopimelic acid	Amino acids and derivatives	Amino acids and derivatives	583-93-7	3	71627	116414	110941	91501.6	72165.9	94159.2	C00666
MWSmce165	165.08	59.02	166.084	C6H14O5	[M-H]-	L-Fucitol	Others	Saccharides	13074-06-1	3	12063.5	13079.4	11930.7	8429.66	15596.8	14165.2	-
pme2435	163.061	59.0139	164.069	C6H12O5	[M-H]-	L-Fucose*	Others	Saccharides	2438-80-4	3	14335.3	20300.1	17397.5	6646.2	15946.3	19968.8	C01019
MWSmce576	179.056	59.0141	180.063	C6H12O6	[M-H]-	L-Glucose*	Others	Saccharides	921-60-8	1	267281	223888	233639	240119	203260	250949	-
pme0014	148.06	84.04	147.053	C5H9NO4	[M+H]+	L-Glutamic acid	Amino acids and derivatives	Amino acids and derivatives	56-86-0	3	401849	386338	420091	346701	419454	420920	C00025
pme0193	147.08	84.04	146.069	C5H10N2O3	[M+H]+	L-Glutamine	Amino acids and derivatives	Amino acids and derivatives	56-85-9	3	1.08015e+07	1.15855e+07	1.12402e+07	1.03192e+07	1.1066e+07	1.2024e+07	C00064
Wacyp02200	203.14	84.04	202.132	C9H18N2O3	[M+H]+	L-Glutamine tert-butyl ester*	Amino acids and derivatives	Amino acids and derivatives	41444-88-6	1	5.22631e+06	5.50504e+06	4.81077e+06	5.18905e+06	5.86455e+06	5.37481e+06	-
Lcsp002225	333.16	188.07	332.149	C16H20N4O4	[M+H]+	L-Glutaminyl-L-tryptophan	Amino acids and derivatives	Amino acids and derivatives	66851-83-0	3	141150	178080	218997	181480	221019	149602	-
Zmmp002167	311.12	136.07	310.116	C14H18N2O6	[M+H]+	L-Glutamyl-L-Tyrosine	Amino acids and derivatives	Amino acids and derivatives	-	3	1.48482e+06	1.77603e+06	1.36494e+06	1.54625e+06	1.9131e+06	1.66891e+06	-
mws5042	223.11	120.09	222.1	C11H14N2O3	[M+H]+	L-Glycyl-L-phenylalanine*	Amino acids and derivatives	Amino acids and derivatives	721-66-4	1	7.41651e+06	8.3912e+06	7.65377e+06	8.26644e+06	8.21461e+06	7.64789e+06	-
mws0254	156.08	110.07	155.07	C6H9N3O2	[M+H]+	L-Histidine	Amino acids and derivatives	Amino acids and derivatives	71-00-1	1	3.95267e+06	4.18039e+06	3.90863e+06	4.29374e+06	3.87407e+06	3.92366e+06	C00135
mws0193	190.12	84.08	189.111	C7H15N3O3	[M+H]+	L-Homocitrulline	Amino acids and derivatives	Amino acids and derivatives	1190-49-4	3	876793	927615	871518	979460	854217	1.04109e+06	C02427
pme0057	136.04	118.03	135.035	C4H9NO2S	[M+H]+	L-Homocysteine	Amino acids and derivatives	Amino acids and derivatives	6027-13-0	3	342715	409699	398727	410385	407367	325127	C00155
pme2890	269.06	136.04	268.055	C8H16N2O4S2	[M+H]+	L-Homocystine	Amino acids and derivatives	Amino acids and derivatives	626-72-2	3	2.25945e+06	2.32135e+06	2.36687e+06	2.17796e+06	2.47036e+06	2.2811e+06	C01817
Lmbp000123	164.07	56.05	163.067	C6H13NO2S	[M+H]+	L-Homomethionine	Amino acids and derivatives	Amino acids and derivatives	25148-30-5	3	22835.5	15899.6	24941.3	15458.8	18346.8	23624.8	C17213
Zmmp002333	146.12	83.09	145.11	C7H15NO2	[M+H]+	L-Homonorleucine	Amino acids and derivatives	Amino acids and derivatives	44902-02-5	3	36024.3	29573.6	38158.6	47121.7	38188.5	33273.6	-
mws0258	132.1	86.1	131.095	C6H13NO2	[M+H]+	L-Isoleucine*	Amino acids and derivatives	Amino acids and derivatives	73-32-5	1	872379	878583	911030	699272	889476	825428	C00407
Lmrj002087	247.13	86.09	246.122	C10H18N2O5	[M+H]+	L-Isoleucyl-L-Aspartate	Amino acids and derivatives	Amino acids and derivatives	-	1	6.72716e+06	7.54812e+06	6.85513e+06	7.51897e+06	7.59852e+06	7.46775e+06	-
MWS00327g	106.05	60.04	105.043	C3H7NO3	[M+H]+	L-Isoserine	Amino acids and derivatives	Amino acids and derivatives	632-13-3	3	46780	60548.5	61821.5	63933.6	74856.2	67335.8	-
mws0227	132.102	86.0964	131.095	C6H13NO2	[M+H]+	L-Leucine*	Amino acids and derivatives	Amino acids and derivatives	61-90-5	1	884049	866872	888157	791175	955342	857401	C00123
Lmhp002031	245.19	86.1	244.179	C12H24N2O3	[M+H]+	L-Leucyl-L-Leucine	Amino acids and derivatives	Amino acids and derivatives	3303-31-9	1	9.06285e+06	8.94371e+06	7.78002e+06	9.506e+06	1.05151e+07	8.73559e+06	-
mws5035	279.17	120.08	278.163	C15H22N2O3	[M+H]+	L-Leucyl-L-phenylalanine*	Amino acids and derivatives	Amino acids and derivatives	56217-82-4	1	4.75669e+06	5.31127e+06	4.55401e+06	5.20683e+06	5.05107e+06	5.00894e+06	-
pme0026	147.11	84.08	146.106	C6H14N2O2	[M+H]+	L-Lysine	Amino acids and derivatives	Amino acids and derivatives	56-87-1	3	9.92751e+06	1.09553e+07	1.03768e+07	1.02872e+07	1.09687e+07	1.07503e+07	C00047
pmb0962	235.165	118.086	234.158	C10H22N2O4	[M+H]+	L-Lysine-Butanoic Acid	Amino acids and derivatives	Amino acids and derivatives	80407-71-2	3	54137.5	36911.8	44183.3	26722.5	31258.6	46703.4	-
mws0275	133.01	71.01	134.022	C4H6O5	[M-H]-	L-Malic acid*	Organic acids	Organic acids	97-67-6	1	3.70316e+06	1.95166e+06	3.5719e+06	3.07634e+06	2.88395e+06	2.27646e+06	C00149
pme1210	150.06	61.01	149.051	C5H11NO2S	[M+H]+	L-Methionine	Amino acids and derivatives	Amino acids and derivatives	63-68-3	3	1.11621e+06	940516	1.08153e+06	793023	1.08506e+06	1.09697e+06	C00073
pme2617	166.05	102.06	165.046	C5H11NO3S	[M+H]+	L-Methionine Sulfoxide	Amino acids and derivatives	Amino acids and derivatives	3226-65-1	3	226955	247329	303668	216215	230998	232350	C02989
mws1587	132.1	86.1	131.095	C6H13NO2	[M+H]+	L-Norleucine*	Amino acids and derivatives	Amino acids and derivatives	327-57-1	1	234627	321198	244972	359492	246227	304057	C01933
pme2527	133.1	116.07	132.09	C5H12N2O2	[M+H]+	L-Ornithine	Amino acids and derivatives	Amino acids and derivatives	70-26-8	3	14983.4	12299	14372.5	14676	19878.1	29460.7	C00077
pme0021	166.09	120.08	165.079	C9H11NO2	[M+H]+	L-Phenylalanine	Amino acids and derivatives	Amino acids and derivatives	63-91-2	1	1.29689e+06	1.60902e+06	1.35855e+06	1.60152e+06	1.36483e+06	1.40603e+06	C00079
MWS00216g	152.11	91.06	151.1	C9H13NO	[M+H]+	L-Phenylalaninol	Amino acids and derivatives	Amino acids and derivatives	3182-95-4	3	25810	45631.2	26393.7	11752.2	30079.8	27034.1	-
MWS0811	130.09	84.08	129.079	C6H11NO2	[M+H]+	L-Pipecolic Acid	Alkaloids	Piperidine alkaloids	3105-95-1	1	3.22749e+06	3.76883e+06	3.99204e+06	4.05258e+06	3.70865e+06	3.32823e+06	C00408
pme0006	116.07	70.07	115.063	C5H9NO2	[M+H]+	L-Proline*	Amino acids and derivatives	Amino acids and derivatives	147-85-3	3	5.77686e+06	5.15522e+06	5.6943e+06	5.9755e+06	5.73572e+06	5.6441e+06	C00148
Lmhp001461	229.15	70.07	228.147	C11H20N2O3	[M+H]+	L-Prolyl-L-Leucine	Amino acids and derivatives	Amino acids and derivatives	52899-07-7	1	2.44663e+07	2.80827e+07	2.58341e+07	2.73787e+07	2.69969e+07	2.70742e+07	-
Lmhp001732	263.14	70.06	262.132	C14H18N2O3	[M+H]+	L-Prolyl-L-Phenylalanine	Amino acids and derivatives	Amino acids and derivatives	13589-02-1	1	327571	415367	311328	425532	319692	306034	-
pme1712	275.125	145.098	276.132	C11H20N2O6	[M-H]-	L-Saccharopine	Amino acids and derivatives	Amino acids and derivatives	997-68-2	3	35920	32240.9	44621.5	33839.4	42343.5	30796.8	C00449
mws0984	236.08	164.06	237.086	C9H11N5O3	[M-H]-	L-Sepiapterin	Nucleotides and derivatives	Nucleotides and derivatives	17094-01-8	3	336687	433452	408654	359053	388311	398621	C00835
Lmrj001698	219.13	60.04	218.127	C9H18N2O4	[M+H]+	L-Seryl-L-Isoleucine	Amino acids and derivatives	Amino acids and derivatives	91086-51-0	3	5.88268e+06	6.42509e+06	5.69129e+06	6.29208e+06	6.15137e+06	6.19909e+06	-
mws1401	175.108	84.0444	174.1	C7H14N2O3	[M+H]+	L-Theanine	Amino acids and derivatives	Amino acids and derivatives	3081-61-6	3	123529	107473	126346	93592	104826	85599.9	C01047
mws0282	203.08	116.05	204.09	C11H12N2O2	[M-H]-	L-Tryptophan	Amino acids and derivatives	Amino acids and derivatives	73-22-3	1	2.82811e+07	3.03602e+07	3.34438e+07	2.76235e+07	3.01923e+07	2.9962e+07	C00078
MWS1771	196.1	91.05	195.089	C10H13NO3	[M+H]+	L-Tyrosine methyl ester	Amino acids and derivatives	Amino acids and derivatives	1080-06-4	3	171184	161198	141939	157071	185955	145262	C03404
mws0250	182.08	136.08	181.074	C9H11NO3	[M+H]+	L-Tyrosine*	Amino acids and derivatives	Amino acids and derivatives	60-18-4	1	2.13924e+06	2.00202e+06	2.4494e+06	1.81297e+06	2.43111e+06	2.08336e+06	C00082
mws0256	118.09	72.08	117.079	C5H11NO2	[M+H]+	L-Valine	Amino acids and derivatives	Amino acids and derivatives	72-18-4	1	3.19687e+07	3.53011e+07	3.64627e+07	3.15569e+07	3.75625e+07	3.38979e+07	C00183
Lmhp001670	231.17	72.08	230.163	C11H22N2O3	[M+H]+	L-Valyl-L-Leucine	Amino acids and derivatives	Amino acids and derivatives	3989-97-7	1	5.45469e+06	6.35414e+06	6.10637e+06	6.54366e+06	6.1423e+06	6.03346e+06	-
Lmhp002001	265.15	72.08	264.147	C14H20N2O3	[M+H]+	L-Valyl-L-Phenylalanine	Amino acids and derivatives	Amino acids and derivatives	3918-92-1	2	2.70429e+07	3.08702e+07	2.8012e+07	2.7918e+07	2.86445e+07	2.86457e+07	-
Zbqp003540	360.21	198.11	359.206	C16H29N3O6	[M+H]+	L-isoleucyl-L-aspartyl-L-isoleucine	Amino acids and derivatives	Amino acids and derivatives	-	3	36241.9	48197.6	34407.9	48467.6	32887.3	63873.4	-
Zmzn000113	146.05	102.06	147.053	C5H9NO4	[M-H]-	L-threo-3-Methylaspartate	Amino acids and derivatives	Amino acids and derivatives	6061-13-8	1	408567	320342	405924	347860	338465	353885	C03618
Zmdp002216	261.14	86.1	260.137	C11H20N2O5	[M+H]+	L-γ-Glutamyl-L-leucine	Amino acids and derivatives	Amino acids and derivatives	2566-39-4	2	1.17494e+06	1.20875e+06	1.14652e+06	1.06718e+06	1.22119e+06	1.28819e+06	-
Wcsn000472	503.16	113.02	504.169	C18H32O16	[M-H]-	Laminaran	Others	Saccharides	9008-22-4	2	3.25621e+06	4.06972e+06	2.80416e+06	2.3185e+06	3.30776e+06	3.75638e+06	-
Lshp211018	407.1	245.05	406.09	C19H18O10	[M+H]+	Lancerin; 4-C-Glucosyl-1,3,7-Trihydroxyxanthone	Flavonoids	Other Flavonoids	81991-99-3	3	67647.2	70979.1	72213.5	81149.8	86796	79361.7	C10075
Lacp004884	447.13	285.076	446.121	C22H22O10	[M+H]+	Lasianthuoside A	Quinones	Anthraquinone	-	3	219768	177643	179620	170816	170388	156281	-
Wcdp004275	230.25	57.07	229.241	C14H31NO	[M+H]+	Lauramine oxide	Others	Others	1643-20-5	2	28456.2	37758.4	34545.5	29538.8	27085.6	29868.7	-
Lcsp003873	316.22	86.1	315.216	C15H29N3O4	[M+H]+	Leu-Ala-Ile	Amino acids and derivatives	Amino acids and derivatives	-	2	198298	158462	159709	123993	198432	207511	-
MW0152202	316.22	86.1	315.216	C15H29N3O4	[M+H]+	Leu-Ala-Leu	Amino acids and derivatives	Amino acids and derivatives	84676-47-1	3	1.21497e+06	1.29767e+06	1.32094e+06	1.44825e+06	1.22911e+06	1.25558e+06	-
MWS201461	288.2	175.12	287.196	C12H25N5O3	[M+H]+	Leu-Arg	Amino acids and derivatives	Amino acids and derivatives	26607-15-8	2	681754	595178	667868	1.18885e+06	645520	673943	-
MW0107708	383.2	160.08	382.196	C16H26N6O5	[M+H]+	Leu-Asn-His	Amino acids and derivatives	Amino acids and derivatives	-	3	1.977e+06	1.88963e+06	1.82732e+06	1.9778e+06	1.88818e+06	2.07508e+06	-
MWS201437	247.13	86.1	246.122	C10H18N2O5	[M+H]+	Leu-Asp	Amino acids and derivatives	Amino acids and derivatives	32949-40-9	2	2.69589e+06	2.59224e+06	3.08841e+06	2.23477e+06	2.24729e+06	2.1309e+06	-
MW0107713	375.22	173.13	374.217	C16H30N4O6	[M+H]+	Leu-Asp-Lys	Amino acids and derivatives	Amino acids and derivatives	-	3	2.49798e+06	2.88126e+06	2.59855e+06	2.2273e+06	2.59488e+06	2.81147e+06	-
Lcsp003225	408.21	215.14	407.206	C20H29N3O6	[M+H]+	Leu-Glu-Phe	Amino acids and derivatives	Amino acids and derivatives	-	3	183315	218700	189149	174713	245989	171975	-
Zbqp003747	360.213	86.0962	359.206	C16H29N3O6	[M+H]+	Leu-Glu-Val*	Amino acids and derivatives	Amino acids and derivatives	-	3	1.09012e+06	1.28206e+06	1.31182e+06	1.14931e+06	1.30734e+06	1.30446e+06	-
MW0152372	373.24	269	372.237	C17H32N4O5	[M+H]+	Leu-Ile-Gln	Amino acids and derivatives	Amino acids and derivatives	-	3	3.45286e+07	3.16568e+07	3.4487e+07	2.58877e+07	3.02829e+07	3.61635e+07	-
Lcsp001901	374.23	199.18	373.221	C17H31N3O6	[M+H]+	Leu-Ile-Glu	Amino acids and derivatives	Amino acids and derivatives	-	3	244529	263446	235777	237664	245107	189989	-
MW0107745	279.17	120.08	278.163	C15H22N2O3	[M+H]+	Leu-Phe*	Amino acids and derivatives	Amino acids and derivatives	3063-05-6	1	5.15124e+06	5.89149e+06	5.20273e+06	5.42231e+06	5.4298e+06	5.06421e+06	-
MW0107752	392.22	177.05	391.211	C20H29N3O5	[M+H]+	Leu-Pro-Tyr	Amino acids and derivatives	Amino acids and derivatives	-	3	5.43593e+06	5.03935e+06	5.47529e+06	5.18089e+06	5.29859e+06	5.27162e+06	-
MW0152491	332.22	96.05	331.211	C15H29N3O5	[M+H]+	Leu-Ser-Ile	Amino acids and derivatives	Amino acids and derivatives	-	3	1.99195e+06	2.29686e+06	1.88956e+06	2.13725e+06	2.30724e+06	2.20085e+06	-
Lcsp001416	304.19	86.1	303.179	C13H25N3O5	[M+H]+	Leu-Thr-Ala	Amino acids and derivatives	Amino acids and derivatives	-	3	556016	731410	514942	551219	354786	573424	-
Lcsn001385	229.15	185.17	230.163	C11H22N2O3	[M-H]-	Leu-Val	Amino acids and derivatives	Amino acids and derivatives	72121-02-9	3	52157.9	58865.3	72861.9	50423.2	43982.3	44322.8	-
Lcsp003135	344.25	185.16	343.247	C17H33N3O4	[M+H]+	Leu-Val-Leu	Amino acids and derivatives	Amino acids and derivatives	58337-01-2	1	24639.7	58517.6	29948	37895	35962.8	15928.1	-
MW0152567	378.24	185.16	377.231	C20H31N3O4	[M+H]+	Leu-Val-Phe	Amino acids and derivatives	Amino acids and derivatives	-	3	1.00343e+06	998904	1.12968e+06	1.02998e+06	1.0559e+06	1.07391e+06	-
Zjyp102908	235.17	105.07	234.162	C15H22O2	[M+H]+	Ligucyperonol	Terpenoids	Sesquiterpenoids	105108-20-1	3	58173.6	76187.1	85499.3	108768	88454	69841	-
Hmcp002399	509.129	347.07	508.122	C23H24O13	[M+H]+	Limocitrin-3-O-glucoside	Flavonoids	Flavonols	-	3	116469	125984	114314	104692	109199	111169	-
Wagp004984	539.14	377.09	538.132	C24H26O14	[M+H]+	Limocitrol 3-Glucoside	Flavonoids	Flavonols	-	3	1.42531e+07	8.73822e+06	1.22661e+07	7.34881e+06	1.2172e+07	1.17311e+07	-
MWSslk177	330.12	168.07	329.111	C14H19NO8	[M+H]+	Lithospermoside	Alkaloids	Alkaloids	63492-69-3	3	1.18855e+06	1.26752e+06	1.23049e+06	1.20417e+06	1.3176e+06	1.32241e+06	C17771
pmp000691	229.11	151.08	228.1	C11H16O5	[M+H]+	Loganetin	Terpenoids	Monoterpenoids	29748-10-5	3	53814	57664.9	49180.1	43104.3	31353.4	45140.3	-
Lmjp004816	197.12	133.1	196.11	C11H16O3	[M+H]+	Loliolide	Terpenoids	Monoterpenoids	5989-02-6	3	1.28075e+06	1.4211e+06	1.36648e+06	1.34862e+06	1.40954e+06	1.34427e+06	-
mws1641	165.04	120.02	164.033	C6H4N4O2	[M+H]+	Lumazine	Nucleotides and derivatives	Nucleotides and derivatives	487-21-8	3	81862.6	64094.7	56922.5	59037.2	49256.9	65382.9	C03212
mws1383	243.09	145.08	242.08	C12H10N4O2	[M+H]+	Lumichrome	Alkaloids	Alkaloids	1086-80-2	3	92802.6	78258.6	85110.6	78226.8	73502.5	64033.1	C01727
mws1430	425.38	95.09	424.37	C30H48O	[M+H]+	Lup-20(29)-en-3-one (Lupenone)	Terpenoids	Triterpene	1617-70-5	3	8959.39	19120.8	20426.6	19543.6	18007.3	13941.4	C16990
Wmcn000052	441.37	441.37	442.381	C30H50O2	[M-H]-	Lup-20(29)-ene-1,3-diol (Glochidiol)	Terpenoids	Triterpene	6610-56-6	3	93884.5	129518	127508	196324	131049	132407	-
MWS20147	449.108	287.061	448.101	C21H20O11	[M+H]+	Luteolin-3'-O-glucoside	Flavonoids	Flavones	5154-41-6	3	2.30166e+06	2.23196e+06	2.1829e+06	2.41143e+06	2.55962e+06	2.2563e+06	-
Hmpp003270	449.11	287.05	448.101	C21H20O11	[M+H]+	Luteolin-4'-O-glucoside*	Flavonoids	Flavones	6920-38-3	3	1.92883e+06	2.15591e+06	2.15888e+06	2.25695e+06	1.96256e+06	2.19556e+06	-
pmb3014	641.15	285.3	642.159	C31H30O15	[M-H]-	Luteolin-7-O-(6''-eudesmyl)glucoside	Flavonoids	Flavones	-	3	10134.7	12380.9	8155.22	15745.4	11860.5	5124.37	-
pmb0578	655.166	207	654.159	C32H30O15	[M+H]+	Luteolin-7-O-(6''-sinapoyl)glucoside	Flavonoids	Flavones	-	3	270245	291732	254304	295012	268061	241652	-
MWSHY0104	449.108	287.062	448.101	C21H20O11	[M+H]+	Luteolin-7-O-glucoside (Cynaroside)*	Flavonoids	Flavones	5373-11-5	3	358717	401095	400114	252626	489172	385880	C03951
Wbsp007290	277.18	137.06	276.173	C17H24O3	[M+H]+	Lycoposerramine E	Others	Ketone compounds	-	3	1.28797e+07	1.48614e+07	1.41477e+07	1.45162e+07	1.43579e+07	1.43163e+07	-
MWS201403	218.15	84.08	217.143	C9H19N3O3	[M+H]+	Lys-Ala	Amino acids and derivatives	Amino acids and derivatives	17043-71-9	3	315080	327815	364647	343290	343248	338325	-
MWS201411	261.16	84.08	260.149	C10H20N4O4	[M+H]+	Lys-Asn	Amino acids and derivatives	Amino acids and derivatives	19908-06-6	3	58779.4	71612	54812.1	52686.8	59166.6	73880.7	-
MWS201412	262.138	84.0816	261.132	C10H19N3O5	[M+H]+	Lys-Asp*	Amino acids and derivatives	Amino acids and derivatives	20556-18-7	3	194791	196956	212863	190445	233910	219361	-
MW0152955	333.18	160.07	332.17	C13H24N4O6	[M+H]+	Lys-Glu-Gly	Amino acids and derivatives	Amino acids and derivatives	57866-06-5	3	2.06946e+07	2.3426e+07	2.2886e+07	2.1491e+07	2.23893e+07	2.20846e+07	-
MWS201419	204.13	84.08	203.127	C8H17N3O3	[M+H]+	Lys-Gly	Amino acids and derivatives	Amino acids and derivatives	7563-03-3	3	1.69629e+07	1.66513e+07	1.61586e+07	1.79686e+07	1.73733e+07	1.71984e+07	-
MWS201464	294.18	84.08	293.174	C15H23N3O3	[M+H]+	Lys-Phe	Amino acids and derivatives	Amino acids and derivatives	6235-35-4	3	73232.2	45913.1	61928.3	48053.3	62324.8	59640.9	-
Zbqp000947	357.25	132.11	356.242	C17H32N4O4	[M+H]+	Lys-Pro-Ile	Amino acids and derivatives	Amino acids and derivatives	-	3	93610.8	137916	87468.9	117526	143417	109767	-
MWS201436	248.16	84.08	247.153	C10H21N3O4	[M+H]+	Lys-Thr	Amino acids and derivatives	Amino acids and derivatives	97791-84-9	3	72200.4	86881.9	79744.6	70593	67223.4	94481.5	-
MWS201471	310.18	84.08	309.169	C15H23N3O4	[M+H]+	Lys-Tyr	Amino acids and derivatives	Amino acids and derivatives	35978-98-4	2	792687	710731	735526	817997	737893	712311	-
pmd0153	409.24	153	410.243	C19H39O7P	[M-H]-	LysoPA 16:0	Lipids	Glycerol ester	22002-85-3	3	804021	923061	932531	850204	745898	838212	C04036
pmb0862	440.28	184.07	439.27	C20H42NO7P	[M+H]+	LysoPC 12:0	Lipids	LPC	20559-18-6	3	95573.7	123726	93198.7	92431.3	109279	87822.1	-
pmd0130	468.31	184.07	467.301	C22H46NO7P	[M+H]+	LysoPC 14:0	Lipids	LPC	20559-16-4	1	1.35291e+06	1.61052e+06	1.52735e+06	1.56161e+06	1.57934e+06	1.50238e+06	-
Lmhp009129	482.32	184.07	481.317	C23H48NO7P	[M+H]+	LysoPC 15:0(2n isomer)*	Lipids	LPC	-	1	1.24877e+06	1.72121e+06	1.60648e+06	1.64127e+06	1.56859e+06	1.50262e+06	-
pmb2319	482.32	184.07	481.317	C23H48NO7P	[M+H]+	LysoPC 15:0*	Lipids	LPC	108273-89-8	1	694570	905294	827402	808580	836547	812003	-
pmb2260	480.31	184.07	479.301	C23H46NO7P	[M+H]+	LysoPC 15:1	Lipids	LPC	-	3	208754	248393	221694	191260	246433	254263	-
pmb0855	496.34	184.07	495.332	C24H50NO7P	[M+H]+	LysoPC 16:0	Lipids	LPC	17364-16-8	1	2.75713e+06	3.04315e+06	3.07422e+06	3.15569e+06	3.00353e+06	2.99973e+06	-
pmd0132	496.34	184.07	495.332	C24H50NO7P	[M+H]+	LysoPC 16:0(2n isomer)	Lipids	LPC	-	1	1.41152e+06	1.76863e+06	1.65431e+06	1.59728e+06	1.6616e+06	1.73443e+06	-
Lmhp008833	494.32	184.07	493.317	C24H48NO7P	[M+H]+	LysoPC 16:1(2n isomer)*	Lipids	LPC	-	1	442814	697049	496826	498756	522704	441789	-
pmp001270	494.32	184.07	493.317	C24H48NO7P	[M+H]+	LysoPC 16:1*	Lipids	LPC	76790-27-7	1	7.99723e+06	1.05194e+07	9.21798e+06	9.49761e+06	8.9343e+06	9.27678e+06	-
pmb0863	492.31	184.07	491.301	C24H46NO7P	[M+H]+	LysoPC 16:2(2n isomer)*	Lipids	LPC	-	1	430023	580697	497969	587242	503592	483017	-
pma1303	492.31	184.07	491.301	C24H46NO7P	[M+H]+	LysoPC 16:2*	Lipids	LPC	-	1	1.96895e+06	2.58708e+06	2.37201e+06	2.18375e+06	2.31461e+06	2.33939e+06	-
Lmhp010515	510.36	184.07	509.348	C25H52NO7P	[M+H]+	LysoPC 17:0(2n isomer)*	Lipids	LPC	-	3	532131	666842	665330	606864	616200	616506	-
pmb2406	510.36	184.07	509.348	C25H52NO7P	[M+H]+	LysoPC 17:0*	Lipids	LPC	50930-23-9	3	377338	419765	483631	509306	494256	547381	-
Lmhp009590	508.34	184.07	507.332	C25H50NO7P	[M+H]+	LysoPC 17:1	Lipids	LPC	-	1	244278	252986	249058	245583	304712	277719	-
Wahlp08069	506.32	184.07	505.317	C25H48NO7P	[M+H]+	LysoPC 17:2(2n isomer)*	Lipids	LPC	-	1	111635	153614	132770	140974	151590	123923	-
Lmhp008718	506.32	184.07	505.317	C25H48NO7P	[M+H]+	LysoPC 17:2*	Lipids	LPC	-	1	135050	152396	158905	160661	136194	143114	-
mws0126	524.37	184.07	523.364	C26H54NO7P	[M+H]+	LysoPC 18:0	Lipids	LPC	19420-57-6	1	9.6341e+06	8.33346e+06	1.08535e+07	1.12722e+07	1.02704e+07	1.11967e+07	-
pmd0136	524.37	184.07	523.364	C26H54NO7P	[M+H]+	LysoPC 18:0(2n isomer)	Lipids	LPC	-	1	1.89362e+07	1.88814e+07	2.37504e+07	2.31516e+07	2.30327e+07	2.38439e+07	-
pmp001281	522.36	184.07	521.348	C26H52NO7P	[M+H]+	LysoPC 18:1	Lipids	LPC	-	1	2.48117e+06	2.75715e+06	2.66424e+06	2.74677e+06	2.60218e+06	2.77518e+06	-
Lmhp010190	522.36	184.07	521.348	C26H52NO7P	[M+H]+	LysoPC 18:1(2n isomer)	Lipids	LPC	-	1	1.43608e+06	1.7705e+06	1.42981e+06	1.49275e+06	1.64168e+06	1.59485e+06	-
pmp001273	520.34	184.07	519.332	C26H50NO7P	[M+H]+	LysoPC 18:2	Lipids	LPC	-	1	3.4867e+06	3.93753e+06	3.47679e+06	3.67164e+06	3.65308e+06	3.6182e+06	-
pmp001251	520.34	184.07	519.332	C26H50NO7P	[M+H]+	LysoPC 18:2(2n isomer)	Lipids	LPC	-	1	2.76469e+06	3.08045e+06	2.82989e+06	2.9946e+06	2.8599e+06	2.68554e+06	-
pmb0854	518.32	184.07	517.317	C26H48NO7P	[M+H]+	LysoPC 18:3	Lipids	LPC	-	1	1.80009e+07	2.20302e+07	1.90574e+07	1.95624e+07	2.01649e+07	2.0083e+07	-
pmb0865	518.32	184.07	517.317	C26H48NO7P	[M+H]+	LysoPC 18:3(2n isomer)	Lipids	LPC	-	1	5.86475e+06	7.43909e+06	6.99224e+06	7.09909e+06	6.92692e+06	6.7293e+06	-
Hmqp006235	516.3	184.07	515.301	C26H46NO7P	[M+H]+	LysoPC 18:4	Lipids	LPC	-	3	26101.4	44489.2	28107.5	28969.3	31194.7	26265.6	-
pmb2228	538.39	184.07	537.379	C27H56NO7P	[M+H]+	LysoPC 19:0	Lipids	LPC	108273-88-7	3	494114	558037	483030	618837	610704	622227	-
Lmhp010908	536.37	184.07	535.364	C27H54NO7P	[M+H]+	LysoPC 19:1	Lipids	LPC	-	2	228658	322528	254783	292386	225365	269187	-
Lmhp007840	534.36	184.07	533.348	C27H52NO7P	[M+H]+	LysoPC 19:2	Lipids	LPC	-	3	992894	1.27721e+06	1.06763e+06	975519	1.10778e+06	899919	-
Lmhp007598	534.36	184.07	533.348	C27H52NO7P	[M+H]+	LysoPC 19:2(2n isomer)	Lipids	LPC	-	3	1.59657e+06	2.19261e+06	1.91216e+06	1.93053e+06	1.99136e+06	2.00549e+06	-
pmd0143	552.4	184.07	551.395	C28H58NO7P	[M+H]+	LysoPC 20:0	Lipids	LPC	108341-80-6	3	8.03948e+06	9.85934e+06	8.73902e+06	8.45335e+06	9.00553e+06	9.00767e+06	-
Lmhp011549	550.39	184.07	549.379	C28H56NO7P	[M+H]+	LysoPC 20:1	Lipids	LPC	-	2	5.61501e+06	6.57571e+06	5.60113e+06	6.14629e+06	5.54926e+06	6.06398e+06	-
pmd0147	548.37	184.07	547.364	C28H54NO7P	[M+H]+	LysoPC 20:2	Lipids	LPC	-	3	6.44395e+06	8.03854e+06	7.37125e+06	7.64098e+06	7.65066e+06	7.51679e+06	-
pmd0146	548.37	184.07	547.364	C28H54NO7P	[M+H]+	LysoPC 20:2(2n isomer)	Lipids	LPC	-	3	821910	1.13303e+06	992765	1.00578e+06	1.00033e+06	1.07962e+06	-
pmc0960	544.34	184.07	543.332	C28H50NO7P	[M+H]+	LysoPC 20:4	Lipids	LPC	-	3	50959.3	49096.5	56976.2	158758	164207	146044	-
Lmhp010099	570.36	184.07	569.348	C30H52NO7P	[M+H]+	LysoPC 22:5	Lipids	LPC	-	3	69941.2	67294.4	66894.8	85096.5	77112.4	76087.3	-
Lmhp009682	570.36	184.07	569.348	C30H52NO7P	[M+H]+	LysoPC 22:5(2n isomer)	Lipids	LPC	-	3	9629.29	16071.5	13310	63324	29969.6	58062.2	-
Lmhp009368	568.34	184.07	567.332	C30H50NO7P	[M+H]+	LysoPC 22:6	Lipids	LPC	-	3	37070.1	58114.5	47885.2	132601	91362.6	109357	-
Lmhp008337	426.26	285.24	425.254	C19H40NO7P	[M+H]+	LysoPE 14:0(2n isomer)*	Lipids	LPE	-	1	28699.6	64039.2	29089	34981.1	39532.6	41276.1	-
pmb0864	426.26	285.24	425.254	C19H40NO7P	[M+H]+	LysoPE 14:0*	Lipids	LPE	-	1	47260.6	54474.2	42504.1	80051.1	57055.3	51789.6	-
Lmhp009187	440.28	299.26	439.27	C20H42NO7P	[M+H]+	LysoPE 15:0	Lipids	LPE	-	3	161255	187799	207680	223720	177381	175735	-
Lmhp008440	438.26	297.24	437.254	C20H40NO7P	[M+H]+	LysoPE 15:1	Lipids	LPE	-	3	23259.2	45921.8	21920	20987	31862.1	36537.6	-
pmb0876	454.29	313.27	453.286	C21H44NO7P	[M+H]+	LysoPE 16:0	Lipids	LPE	53862-35-4	1	1.85798e+07	1.66622e+07	2.11148e+07	1.93046e+07	2.08393e+07	2.05123e+07	-
pmd0160	454.29	313.27	453.286	C21H44NO7P	[M+H]+	LysoPE 16:0(2n isomer)	Lipids	LPE	-	3	136551	126766	163422	121878	109307	127400	-
Lmhp008763	452.28	311.26	451.27	C21H42NO7P	[M+H]+	LysoPE 16:1(2n isomer)*	Lipids	LPE	-	1	40494.5	46358.8	29438	37655.9	42650	63162.3	-
Lmhp009034	452.28	311.26	451.27	C21H42NO7P	[M+H]+	LysoPE 16:1*	Lipids	LPE	-	1	397048	432238	384954	432759	401492	416535	-
Lmhp009464	466.29	325.27	465.286	C22H44NO7P	[M+H]+	LysoPE 17:1(2n isomer)*	Lipids	LPE	-	3	79549.4	105929	127420	105229	107449	120009	-
Lmhp009769	466.29	325.27	465.286	C22H44NO7P	[M+H]+	LysoPE 17:1*	Lipids	LPE	-	3	114443	114319	98020.7	137148	125307	103154	-
pmb0883	482.32	341.31	481.317	C23H48NO7P	[M+H]+	LysoPE 18:0	Lipids	LPE	69747-55-3	3	790034	772221	1.18601e+06	1.0804e+06	836129	966716	-
pmb0880	482.32	341.31	481.317	C23H48NO7P	[M+H]+	LysoPE 18:0(2n isomer)	Lipids	LPE	-	3	376617	356872	368981	421716	418685	320767	-
pmb0856	480.31	339.29	479.301	C23H46NO7P	[M+H]+	LysoPE 18:1(2n isomer)*	Lipids	LPE	-	3	3.6508e+06	4.18397e+06	3.88191e+06	3.61576e+06	3.57914e+06	4.15996e+06	-
mws0289	480.31	339.29	479.301	C23H46NO7P	[M+H]+	LysoPE 18:1*	Lipids	LPE	89576-29-4	3	2.08251e+07	2.22251e+07	2.20615e+07	2.4916e+07	2.19845e+07	2.05057e+07	-
pmb0881	478.29	337.27	477.286	C23H44NO7P	[M+H]+	LysoPE 18:2	Lipids	LPE	-	3	730097	873787	828525	811587	816831	808088	-
pmb0874	478.29	337.27	477.286	C23H44NO7P	[M+H]+	LysoPE 18:2(2n isomer)	Lipids	LPE	-	3	3.52851e+06	3.79522e+06	3.56884e+06	3.16178e+06	3.77428e+06	3.49855e+06	-
Lmhp008801	476.28	335.26	475.27	C23H42NO7P	[M+H]+	LysoPE 18:3	Lipids	LPE	-	1	785299	871801	719391	831291	878889	779599	-
Lmhp008589	476.28	335.26	475.27	C23H42NO7P	[M+H]+	LysoPE 18:3(2n isomer)	Lipids	LPE	-	1	118972	168255	137400	207702	138109	225811	-
Lmhp010757	506.32	365.31	505.317	C25H48NO7P	[M+H]+	LysoPE 20:2	Lipids	LPE	-	3	102492	122287	128685	99162	108417	105705	-
Lmhp010514	506.32	365.31	505.317	C25H48NO7P	[M+H]+	LysoPE 20:2(2n isomer)	Lipids	LPE	-	3	109117	108851	111169	98095.7	111176	97137	-
Hmyn007168	483.27	255.23	484.28	C22H45O9P	[M-H]-	LysoPG 16:0	Lipids	Glycerol ester	-	2	14565.4	16699.4	21047.8	22837.2	17767.1	18609.6	-
Hasp010605	353.27	261.22	352.261	C21H36O4	[M+H]+	MG(18:3(9Z,12Z,15Z)/0:0/0:0)	Lipids	Glycerol ester	129828-41-7	1	8.92997e+06	9.90301e+06	9.43305e+06	1.01742e+07	1.00147e+07	9.69595e+06	-
Lmmn006306	293.21	293.21	294.219	C18H30O3	[M-H]-	Machilusolide D	Others	Lactones	-	3	8.56713e+06	8.29282e+06	8.31452e+06	8.94057e+06	8.58378e+06	8.44478e+06	-
Wbmp010456	277.22	93.07	276.209	C18H28O2	[M+H]+	Macrophypene B	Terpenoids	Ditepenoids	-	3	5.42449e+06	5.14298e+06	5.38292e+06	5.72745e+06	5.26295e+06	5.56035e+06	-
Sagp002728	451.12	289.07	450.116	C21H22O11	[M+H]+	Maesopsin 4-O-Glucoside(Hovetrichoside C)	Flavonoids	Aurones	-	3	485153	500007	490754	466705	488391	451207	-
Walbn00429	295.07	115	296.074	C10H16O10	[M-H]-	Malic acid-1-O-beta-D-glucopyranoside	Organic acids	Organic acids	-	3	288232	359261	322440	324081	354782	386278	-
Wayn000504	457.119	341.11	458.127	C16H26O15	[M-H]-	Malic acid-1-O-diglucoside	Organic acids	Organic acids	-	3	8.84252e+06	8.10072e+06	8.71203e+06	7.15549e+06	7.67534e+06	9.29215e+06	-
pme1975	103	59.01	104.011	C3H4O4	[M-H]-	Malonic acid	Organic acids	Organic acids	141-82-2	3	93142.1	96263.9	123020	93294	120965	120898	C00383
Wcfp004977	291.1	245.09	290.09	C14H14N2O5	[M+H]+	Malonyltryptophan	Amino acids and derivatives	Amino acids and derivatives	-	1	1.52506e+06	1.59133e+06	1.57932e+06	1.61588e+06	1.60158e+06	1.59319e+06	-
MWS1983	343.12	89.03	344.132	C12H24O11	[M-H]-	Maltitol	Others	Saccharides	585-88-6	3	2.64121e+06	2.83301e+06	2.64754e+06	2.71915e+06	2.71789e+06	2.89458e+06	-
MWS0442	527.16	365.1	504.169	C18H32O16	[M+Na]+	Maltotriose	Others	Saccharides	1109-28-0	3	857313	761768	984633	613904	811418	800274	C01835
pme2362	151.04	107.05	152.047	C8H8O3	[M-H]-	Mandelic acid	Phenolic acids	Phenolic acids	90-64-2	3	68447.6	101628	88928.1	87955.6	66528.1	61283.9	C01984
Lmyn002403	313.093	101.024	314.1	C14H18O8	[M-H]-	Mandelic acid-β-glucoside	Organic acids	Organic acids	-	3	32061.5	42746.7	32994.1	35660.9	34019.6	33222.2	-
MWSHY0078	423.092	303.05	422.085	C19H18O11	[M+H]+	Mangiferin*	Flavonoids	Other Flavonoids	4773-96-0	3	2.07233e+06	1.86117e+06	2.08484e+06	2.19227e+06	2.06138e+06	2.17979e+06	C10077
MWSmce486	503.16	383.12	504.169	C18H32O16	[M-H]-	Manninotriose	Others	Saccharides	13382-86-0	2	42391.9	60127	42393	49631.2	53578.7	43545.4	C05404
MWStz490	449.11	287.06	450.116	C21H22O11	[M-H]-	Marein	Flavonoids	Chalcones	535-96-6	3	57092.7	54198.8	69772.7	76261.7	67726.8	74761.4	-
Cmpk004510	509.23	329.18	508.231	C26H36O10	[M+H]+	Mascaroside I	Terpenoids	Ditepenoids	60129-63-7	1	1.10147e+06	1.14637e+06	482826	643755	784743	570255	C09132
Cmpk004764	491.22	329.17	490.22	C26H34O9	[M+H]+	Mascaroside II	Terpenoids	Ditepenoids	1583263-46-0	1	820778	1.11357e+06	849702	752322	926686	897715	-
Cmpk006300	685.28	177.05	684.278	C36H44O13	[M+H]+	Mascaroside III	Terpenoids	Ditepenoids	2214215-14-0	3	104080	158713	171343	127085	160973	147085	-
Cmpk006206	715.29	207.07	714.289	C37H46O14	[M+H]+	Mascaroside IV	Terpenoids	Ditepenoids	2214215-15-1	3	30646.5	23678.8	13700.5	40055.6	30989.2	30597.2	-
Lssp210087	359.15	137.06	358.142	C20H22O6	[M+H]+	Matairesinol	Lignans and Coumarins	Lignans	580-72-3	3	397582	434617	398076	380673	378288	375156	C10682
Lmtn002997	493.099	331.046	494.106	C22H22O13	[M-H]-	Mearnsetin-3-O-glucoside	Flavonoids	Flavones	-	3	2.93646e+06	3.30706e+06	2.69356e+06	2.63679e+06	3.02073e+06	2.91965e+06	-
mws1333	341.11	113.02	342.116	C12H22O11	[M-H]-	Melibiose	Others	Saccharides	585-99-9	1	1.96522e+07	2.11368e+07	2.13801e+07	2.43701e+07	2.10928e+07	2.30158e+07	C05402
MWS201399	264.1	104.05	263.094	C9H17N3O4S	[M+H]+	Met-Asn	Amino acids and derivatives	Amino acids and derivatives	36261-61-7	3	61150.1	50213.3	33502.9	53023.8	31517.1	54060.4	-
MWS201421	297.13	104.06	296.12	C14H20N2O3S	[M+H]+	Met-Phe	Amino acids and derivatives	Amino acids and derivatives	14492-14-9	3	26725.7	13727.3	20564.4	17782.5	19842.9	10637.8	-
MWS201429	237.09	104.05	236.083	C8H16N2O4S	[M+H]+	Met-Ser	Amino acids and derivatives	Amino acids and derivatives	14517-43-2	3	106261	103749	143977	157093	103708	100573	-
MWS201430	251.11	104.05	250.099	C9H18N2O4S	[M+H]+	Met-Thr	Amino acids and derivatives	Amino acids and derivatives	40883-16-7	3	60737.6	88875.4	69796.8	84010.7	91747.4	99494.1	-
pmb0818	206.08	145.05	205.074	C11H11NO3	[M+H]+	Methoxyindoleacetic acid	Alkaloids	Plumerane	3471-31-6	3	1.04316e+07	1.17034e+07	1.07521e+07	1.10814e+07	1.06692e+07	1.08016e+07	C05660
Yalp008047	291.23	93.07	290.225	C19H30O2	[M+H]+	Methyl 12-phenyldodecanoate*	Lipids	Free fatty acids	38795-65-2	1	410804	391304	395354	386281	369744	421092	-
Hmtn001288	181.05	135.04	182.058	C9H10O4	[M-H]-	Methyl 2,4-dihydroxyphenylacetate*	Phenolic acids	Phenolic acids	67828-42-6	3	104000	107461	109681	92127.2	110406	104846	-
MWSmce585	104.07	59.01	103.063	C4H9NO2	[M+H]+	Methyl 3-aminopropanoate	Amino acids and derivatives	Amino acids and derivatives	4138-35-6	3	3.1314e+06	3.6284e+06	3.45302e+06	3.2815e+06	3.3702e+06	3.53688e+06	-
Wahlp01697	179.07	91.05	178.063	C10H10O3	[M+H]+	Methyl 3-oxo-2-phenylpropanoate	Phenolic acids	Phenolic acids	5894-79-1	3	200051	177765	261755	199724	274270	293680	-
Zmgn004894	151.04	136.02	152.047	C8H8O3	[M-H]-	Methyl 4-hydroxybenzoate	Phenolic acids	Phenolic acids	99-76-3	3	41604.9	57590.3	37390.5	43917	53485.5	43223.7	-
Wbhp009564	335.26	335.26	334.251	C21H34O3	[M+H]+	Methyl 8,9-epoxypimaran-18-oate	Terpenoids	Terpene	42855-38-9	3	176206	276353	252253	95736	177630	144966	-
Wamxn00739	253.09	59.01	194.079	C7H14O6	[M+CH3COO]-	Methyl Alpha-D-Galactopyranoside	Others	Alcohol compounds	-	1	285015	236912	202686	158780	195644	357394	-
Wbsp004755	179.07	119.05	178.063	C10H10O3	[M+H]+	Methyl Hydroxycinnamate	Phenolic acids	Phenolic acids	80540-55-2	1	669312	709966	790707	884006	802755	787233	-
MWSmce582	144.07	84.04	143.058	C6H9NO3	[M+H]+	Methyl L-pyroglutamate	Amino acids and derivatives	Amino acids and derivatives	4931-66-2	3	112707	122097	99281.5	127249	104569	109937	-
MWS1912	227.164	153.127	226.157	C13H22O3	[M+H]+	Methyl dihydrojasmonate	Organic acids	Organic acids	24851-98-7	3	67689.9	76115.9	39743.6	69472.2	86777.4	70408.2	-
Hmyp002656	222.075	130.064	221.069	C11H11NO4	[M+H]+	Methyl dioxindole-3-acetate	Alkaloids	Plumerane	57061-18-4	3	92763.7	78050.1	86582.9	69522.6	67656.2	101850	-
MWSmce230	183.03	124.02	184.037	C8H8O5	[M-H]-	Methyl gallate*	Phenolic acids	Phenolic acids	99-24-1	3	48724.4	58483.5	44148.5	48444.2	39690	53009.9	-
MWSmce689	293.25	95.09	292.24	C19H32O2	[M+H]+	Methyl linolenate	Lipids	Free fatty acids	301-00-8	2	276730	231268	277912	327351	243015	270189	-
pmn001669	237.08	207.03	238.084	C12H14O5	[M-H]-	Methyl sinapate	Phenolic acids	Phenolic acids	20733-94-2	1	107690	111364	114781	109127	109822	120027	-
Lhjp111614	429.138	147.044	428.132	C19H24O11	[M+H]+	Methylasperuloside	Terpenoids	Monoterpenoids	-	3	104609	149057	139860	158127	152411	136409	-
pme0109	212.09	166.09	211.084	C10H13NO4	[M+H]+	Methyldopa	Amino acids and derivatives	Amino acids and derivatives	555-30-6	3	174089	140147	170562	84168.1	156583	139436	C07194
MWSprf050	625.213	317.105	624.205	C29H36O15	[M+H]+	Methylhesperidin	Flavonoids	Flavanones	11013-97-1	3	31105.1	66876.8	50142.1	32398	42990.3	59004.2	C17393
mws0470	117.019	73.0295	118.027	C4H6O4	[M-H]-	Methylmalonic acid*	Organic acids	Organic acids	516-05-2	1	2.77304e+06	3.59506e+06	3.09621e+06	3.33167e+06	3.33938e+06	3.41058e+06	C02170
Lhjp111612	461.11	147.044	460.104	C19H24O11S	[M+H]+	Methylpaederoside	Terpenoids	Monoterpenoids	-	3	43957.9	50971.3	26298.2	55794	42863.3	22700.5	-
pme3154	147.07	59.01	148.074	C6H12O4	[M-H]-	Mevalonic acid	Organic acids	Organic acids	150-97-0	3	30878.4	27264.6	21715.4	21811.4	31357.4	42706.8	C00418
MWSmce433	369.18	160.078	368.174	C21H24N2O4	[M+H]+	Mitraphylline	Alkaloids	Plumerane	509-80-8	3	218418	296552	258896	214744	232803	213419	C09227
Lmsp010763	353.27	261.22	352.261	C21H36O4	[M+H]+	Monolinolenin*	Lipids	Glycerol ester	75685-85-7	1	2.06242e+06	2.0245e+06	1.89719e+06	2.08391e+06	2.16584e+06	2.03931e+06	-
pme3514	301.035	151.004	302.043	C15H10O7	[M-H]-	Morin*	Flavonoids	Flavonols	480-16-0	3	11450.1	11948		16615.2	10580.4	9339.86	C10105
Wacyp11235	291.23	93.07	290.224	C19H30O2	[M+H]+	Moroctic Acid methyl ester*	Lipids	Free fatty acids	73097-00-4	1	386634	386931	381127	406181	374613	395324	-
Lmhn011365	455.353	455.353	456.36	C30H48O3	[M-H]-	Morolic acid*	Terpenoids	Triterpene	559-68-2	3	444983	396092	493114	492215	474978	436089	-
Lmyn000160	237.06	87.01	238.069	C8H14O8	[M-H]-	Mucic acid Dimethyl Ester	Organic acids	Organic acids	-	1	184125	199726	162393	146866	169543	191636	-
pme3207	141.02	59.01	142.027	C6H6O4	[M-H]-	Muconic acid	Organic acids	Organic acids	1119-72-8	3	356574	537310	372714	345449	375420	440118	C02480
Wamxn02395	323.14	59.01	324.142	C13H24O9	[M-H]-	Mycarose glucoside	Others	Aldehyde compounds	-	3	482790	532991	505299	475852	527526	494230	-
Walbp09179	228.23	57.07	227.225	C14H29NO	[M+H]+	Myristamide	Lipids	Free fatty acids	638-58-4	2	117915	188137	139805	135071	131454	128915	-
Lmlp003024	439.22	277.17	438.211	C20H30O7N4	[M+H]+	N'-p-Coumaroylagmatine-glucoside	Alkaloids	Phenolamine	-	3	1.38664e+06	868714	1.06743e+06	1.03133e+06	999292	1.26118e+06	-
MWS04412	175.12	70.07	174.137	C8H18N2O2	[M+H]+	N(6),N(6)-Dimethyl-L-lysine	Amino acids and derivatives	Amino acids and derivatives	2259-86-1	3	4.02415e+06	3.07445e+06	3.50841e+06	3.45423e+06	3.23805e+06	3.21878e+06	-
Lcfp013143	298.11	136.06	297.107	C11H15N5O5	[M+H]+	N(6)-OH-Me-Adenosine	Nucleotides and derivatives	Nucleotides and derivatives	-	1	1.22996e+06	1.03838e+06	1.35823e+06	1.02968e+06	1.41402e+06	976050	-
MWS5164	203.15	70.07	202.143	C8H18N4O2	[M+H]+	N,N'-Dimethylarginine;SDMA*	Amino acids and derivatives	Amino acids and derivatives	30344-00-4	2	3.71474e+06	4.2481e+06	4.20966e+06	3.59405e+06	4.1409e+06	4.11426e+06	-
MW0108503	184.11	83	183.101	C8H13N3O2	[M+H]+	N,N-Dimethyl-L-histidine	Amino acids and derivatives	Amino acids and derivatives	24940-57-6	3	2.54626e+07	2.47893e+07	2.60812e+07	2.5653e+07	2.66934e+07	2.50208e+07	C04259
pme3033	104.07	58.07	103.063	C4H9NO2	[M+H]+	N,N-Dimethylglycine*	Amino acids and derivatives	Amino acids and derivatives	1118-68-9	3	3.0554e+06	3.45192e+06	3.3522e+06	3.27133e+06	3.66694e+06	3.27686e+06	C01026
Zahp006511	280.25	67.05	279.256	C18H33NO	[M+H]+	N-((9E,11E)-13-methylpentadeca-9,11-dien-1-yl)acetamide	Alkaloids	Alkaloids	-	3	788458	898809	850325	846311	823496	799776	-
Wayp001214	337.18	175.12	336.164	C12H24N4O7	[M+H]+	N-(1-Deoxy-1-fructosyl)Arginine	Amino acids and derivatives	Amino acids and derivatives	-	3	59437.7	91534.1	116190	60284.5	117132	87541.3	-
Wayn000341	293.1	131.05	294.107	C10H18N2O8	[M-H]-	N-(1-Deoxy-1-fructosyl)Asparagine	Amino acids and derivatives	Amino acids and derivatives	-	3	136645	141428	133941	123150	159520	154083	-
Wayn000815	308.1	146.04	309.105	C11H19NO9	[M-H]-	N-(1-Deoxy-1-fructosyl)Glutamic acid	Amino acids and derivatives	Amino acids and derivatives	-	3	37644.9	49670	32745.6	24754.8	32284.7	42407.5	-
Wayn001257	292.14	130.09	293.147	C12H23NO7	[M-H]-	N-(1-Deoxy-1-fructosyl)Leucine	Amino acids and derivatives	Amino acids and derivatives	-	1	1.07732e+06	1.0873e+06	832739	1.06797e+06	919972	1.0567e+06	-
Wayn002083	326.12	164.07	327.131	C15H21NO7	[M-H]-	N-(1-Deoxy-1-fructosyl)Phenylalanine	Amino acids and derivatives	Amino acids and derivatives	-	2	1.2099e+06	1.18387e+06	1.30917e+06	1.18787e+06	1.27182e+06	1.13051e+06	-
Wayn000421	276.11	114.06	277.116	C11H19NO7	[M-H]-	N-(1-Deoxy-1-fructosyl)Proline	Amino acids and derivatives	Amino acids and derivatives	-	3	20953.4	32694.1	25292.1	27056.4	28497.2	32434	-
Wayn002636	365.13	203.08	366.142	C17H22N2O7	[M-H]-	N-(1-Deoxy-1-fructosyl)Tryptophan	Amino acids and derivatives	Amino acids and derivatives	-	1	4.21382e+06	4.18317e+06	4.47783e+06	3.80101e+06	4.21386e+06	4.02527e+06	-
Wayp001104	344.13	182.08	343.126	C15H21NO8	[M+H]+	N-(1-Deoxy-1-fructosyl)Tyrosine	Amino acids and derivatives	Amino acids and derivatives	-	2	538696	441196	408025	510958	511903	397272	-
Wayp001024	280.14	216.12	279.132	C11H21NO7	[M+H]+	N-(1-Deoxy-1-fructosyl)Valine	Amino acids and derivatives	Amino acids and derivatives	-	3	1.7684e+06	1.58831e+06	1.78919e+06	1.1229e+06	1.93962e+06	1.53376e+06	-
MWStz070	182.08	91.05	181.074	C9H11NO3	[M+H]+	N-(2-Hydroxy-4-methoxyphenyl)acetamide	Alkaloids	Alkaloids	58469-06-0	1	1.13882e+07	9.91324e+06	1.19303e+07	8.40137e+06	1.14328e+07	9.06632e+06	-
pmp001260	364.285	346.275	363.277	C22H37NO3	[M+H]+	N-(2-Hydroxyethyl)eicosapentaenoic acid	Lipids	Free fatty acids	-	3	362447	380496	279585	375737	357586	389433	-
Zbqn002456	266.07	88.04	267.074	C12H13NO6	[M-H]-	N-(3,4,5-trihydroxycinnamicacid)-alanine	Amino acids and derivatives	Amino acids and derivatives	-	3	264169	297084	250054	281370	299157	263579	-
mws0124	247.108	130.063	246.1	C13H14N2O3	[M+H]+	N-(3-Indolylacetyl)-L-alanine	Amino acids and derivatives	Amino acids and derivatives	57105-39-2	3	122343	124442	125283	180716	158590	113148	-
Lacp001431	268.15	136.06	267.147	C14H21NO4	[M+H]+	N-(3-hydroxy-4-methoxyphenethyl)-4-hydroxybutanamide	Alkaloids	Alkaloids	-	3	5.58015e+06	5.59956e+06	5.74219e+06	5.79673e+06	6.03287e+06	5.99409e+06	-
pmn001727	474.18	312.12	475.184	C24H29NO9	[M-H]-	N-(4-O-(Glucosyl)-E-feruloyl)-tyramine	Alkaloids	Phenolamine	-	3	63215.8	55065.5	80141.6	62301.7	43984.5	73773.6	-
Zajp000573	144.1	84.08	143.095	C7H13NO2	[M+H]+	N-(4-oxopentyl)-acetamide	Alkaloids	Alkaloids	-	1	1.03785e+06	1.04753e+06	859257	942422	857160	854501	-
MWS1882	132.03	88.0403	133.037	C4H7NO4	[M-H]-	N-(Carboxymethyl)glycine*	Amino acids and derivatives	Amino acids and derivatives	142-73-4	1	124710	126658	122057	109506	114118	109924	C19911
Walbn05413	292.12	130.09	293.126	C15H19NO5	[M-H]-	N-(E)-Caffeoyl-L-leucine	Alkaloids	Phenolamine	-	3	14707	22480.5	19016.6	20975.1	25362.3	25866	-
Wagp003695	324.11	177.05	323.101	C15H17NO7	[M+H]+	N-(Isoferuloyl)-Glutamic Acid	Alkaloids	Phenolamine	-	1	404297	417191	423763	540370	345779	357716	-
Zbqn004590	206.08	164.07	207.089	C11H13NO3	[M-H]-	N-(acetyl)phenylalanine	Amino acids and derivatives	Amino acids and derivatives	-	1	133451	198966	118472	241576	188888	186600	-
pma1751	286.092	124.039	285.085	C12H15NO7	[M+H]+	N-(beta-D-Glucosyl)nicotinate	Others	Vitamin	-	3	1.8419e+06	2.64695e+06	2.18891e+06	2.05735e+06	2.17076e+06	2.13512e+06	-
Zbqn004234	250.07	164.07	251.079	C12H13NO5	[M-H]-	N-(malonyl)phenylalanine	Amino acids and derivatives	Amino acids and derivatives	-	3	136777	147225	126874	132473	172643	169592	-
Zbqn004682	289.08	203.08	290.09	C14H14N2O5	[M-H]-	N-(malonyl)tryptophan	Amino acids and derivatives	Amino acids and derivatives	-	3	9854.68	18291.9	17215.5	35194.4	25958.5	19839.9	-
Zbqn000955	294.08	132.03	295.09	C10H17NO9	[M-H]-	N-Acetoxy-glucosyl-alanine	Amino acids and derivatives	Amino acids and derivatives	-	3	67105.2	54583.7	55368.4	71167.2	51862.1	55879.9	-
mws0677	219.11	160.08	218.106	C12H14N2O2	[M+H]+	N-Acetyl-5-hydroxytryptamine	Alkaloids	Plumerane	1210-83-9	3	203362	249292	229283	195652	224642	196157	C00978
Lcfn121061	261.09	131.04	262.095	C13H14N2O4	[M-H]-	N-Acetyl-6-hydroxy-L-tryptophan	Amino acids and derivatives	Amino acids and derivatives	-	2	16856.1	22269.7	33017	24241.3	25951.2	27652.3	-
mws2608	222.1	84.05	221.09	C8H15NO6	[M+H]+	N-Acetyl-D-galactosamine	Others	Saccharides	1811-31-0	3	338360	303956	455797	386178	313283	317852	C01132
mws4174	222.1	138.05	221.09	C8H15NO6	[M+H]+	N-Acetyl-D-mannosamine	Others	Saccharides	7772-94-3	3	28695.8	40068.4	26912.1	37908.4	25183.8	24417.8	C00645
MWSslk120	208.1	120.08	207.089	C11H13NO3	[M+H]+	N-Acetyl-DL-phenylalanine	Amino acids and derivatives	Amino acids and derivatives	2901-75-9	1	7.67398e+06	8.68716e+06	8.24786e+06	6.60151e+06	7.72208e+06	8.49414e+06	-
pme0170	217.13	158.08	216.122	C8H16N4O3	[M+H]+	N-Acetyl-L-Arginine	Amino acids and derivatives	Amino acids and derivatives	155-84-0	3	528372	608622	641657	521025	650937	557386	-
pme2559	174.04	88.04	175.048	C6H9NO5	[M-H]-	N-Acetyl-L-Aspartic Acid	Amino acids and derivatives	Amino acids and derivatives	997-55-7	3	55788.9	59073.2	49617.7	43629.4	62422.2	70857.9	C01042
pme0137	187.07	125.07	188.08	C7H12N2O4	[M-H]-	N-Acetyl-L-Glutamine	Amino acids and derivatives	Amino acids and derivatives	2490-97-3	3	881493	1.10047e+06	1.0725e+06	1.03276e+06	1.03274e+06	978235	-
MWSslk140	192.07	56.05	191.062	C7H13NO3S	[M+H]+	N-Acetyl-L-Methionine	Amino acids and derivatives	Amino acids and derivatives	65-82-7	3	44744.3	25265.1	30730.9	39965	37411.8	36768.6	C02712
pmb2591	245.09	203.08	246.1	C13H14N2O3	[M-H]-	N-Acetyl-L-Tryptophan	Amino acids and derivatives	Amino acids and derivatives	1218-34-4	1	5.50792e+06	8.93999e+06	4.72709e+06	1.01395e+07	8.16247e+06	7.96381e+06	-
pme0075	188.06	128.04	189.064	C7H11NO5	[M-H]-	N-Acetyl-L-glutamic acid	Amino acids and derivatives	Amino acids and derivatives	1188-37-0	2	192105	208171	233594	207285	252382	237247	C00624
pme3193	116.04	74.02	117.043	C4H7NO3	[M-H]-	N-Acetyl-L-glycine	Amino acids and derivatives	Amino acids and derivatives	543-24-8	3	54637.9	52924.9	50415	53834.2	59388.7	63558.2	-
mws3133	174.08	86.06	173.069	C7H11NO4	[M+H]+	N-Acetyl-L-hydroxyproline	Amino acids and derivatives	Amino acids and derivatives	33996-33-7	3	106126	142206	113499	126948	122747	118891	-
pme0253	174.11	86.1	173.105	C8H15NO3	[M+H]+	N-Acetyl-L-leucine	Amino acids and derivatives	Amino acids and derivatives	1188-21-2	3	623514	810835	649774	810271	641888	811078	C02710
Zmgn002106	206.08	58.03	207.089	C11H13NO3	[M-H]-	N-Acetyl-L-phenylalanine	Amino acids and derivatives	Amino acids and derivatives	2018-61-3	2	1.17171e+06	1.38891e+06	1.25306e+06	1.27611e+06	1.33265e+06	1.42385e+06	C03519
pme3382	160.06	98.02	161.069	C6H11NO4	[M-H]-	N-Acetyl-L-threonine	Amino acids and derivatives	Amino acids and derivatives	17093-74-2	3	56475.8	80032.6	51087.5	69599	64086.3	54503.9	-
mws0520	224.09	136.08	223.084	C11H13NO4	[M+H]+	N-Acetyl-L-tyrosine	Amino acids and derivatives	Amino acids and derivatives	537-55-3	3	1.00323e+06	1.10547e+06	1.10203e+06	993638	1.17678e+06	1.07276e+06	-
MWS3020	145.13	86.1	144.126	C7H16N2O	[M+H]+	N-Acetylcadaverine	Alkaloids	Alkaloids	32343-73-0	3	87725.8	65410.4	70973	48283.7	57209.9	51116.4	-
Wahlp02551	188.07	118.07	187.063	C11H9NO2	[M+H]+	N-Acetylindole-3-carboxaldehyde*	Alkaloids	Plumerane	22948-94-3	1	1.49441e+07	1.57281e+07	1.53794e+07	1.56466e+07	1.62641e+07	1.67095e+07	-
Zmtn001624	188.04	144.05	189.043	C10H7NO3	[M-H]-	N-Acetylisatin	Alkaloids	Plumerane	574-17-4	3	216880	147120	29106	130831	206704	220690	C02172
MWS4471	173.06	58.03	174.064	C6H10N2O4	[M-H]-	N-Alpha-Acetyl-L-Asparagine	Amino acids and derivatives	Amino acids and derivatives	4033-40-3	3	206051	219046	249625	264965	228186	178906	-
pmp001287	120.08	103.05	119.073	C8H9N	[M+H]+	N-Benzylmethylene isomethylamine	Alkaloids	Alkaloids	-	1	907978	1.06563e+06	984790	945046	947111	1.00224e+06	-
pmb0323n	249.12	135.05	250.132	C13H18N2O3	[M-H]-	N-Caffeoylputrescine	Alkaloids	Phenolamine	29554-26-5	3	129867	95797.2	126296	102893	113610	111695	C03002
MWStz221	314.14	177.06	313.131	C18H19NO4	[M+H]+	N-Cis-Feruloyltyramine*	Alkaloids	Phenolamine	80510-09-4	3	254228	215341	262225	218831	240592	250639	-
MWS00204g	104.071	58.0659	103.063	C4H9NO2	[M+H]+	N-Ethylglycine*	Amino acids and derivatives	Amino acids and derivatives	627-01-0	3	3.12901e+06	3.35195e+06	3.37862e+06	3.19146e+06	3.31005e+06	3.37163e+06	-
MWSslk042	126.054	80.0125	125.048	C6H7NO2	[M+H]+	N-Ethylmaleimide (NEM)	Amino acids and derivatives	Amino acids and derivatives	128-53-0	3	33704.3	43798.2	47538.6	33333.8	31813.2	30689.2	C02441
ZbWp003008	194.12	120.08	193.11	C11H15NO2	[M+H]+	N-Ethylphenylalanine	Amino acids and derivatives	Amino acids and derivatives	-	3	85924.9	106588	95076.5	111372	104839	110234	-
Lmhp003013	279.17	177.05	278.163	C15H22N2O3	[M+H]+	N-Feruloyl-Cadaverine	Alkaloids	Phenolamine	-	3	87499.1	95496.2	117493	111405	98636.9	77884.8	-
pmb0496	307.18	177.05	306.169	C15H22N4O3	[M+H]+	N-Feruloylagmatine	Alkaloids	Phenolamine	-	3	106692	119171	84422	90263.5	114266	94174.2	C18325
Waqkp02147	323.17	177.05	322.164	C15H22N4O4	[M+H]+	N-Feruloylhydroxyagmatine	Alkaloids	Phenolamine	-	3	1.0385e+07	1.08531e+07	1.06356e+07	9.64059e+06	1.09919e+07	1.12002e+07	-
Lmlp003161	265.15	177.06	264.147	C14H20N2O3	[M+H]+	N-Feruloylputrescine	Alkaloids	Phenolamine	501-13-3	1	277850	286287	323086	416100	320540	279501	C10497
MWStz224	353.15	177.059	352.142	C20H20N2O4	[M+H]+	N-Feruloylserotonin*	Alkaloids	Plumerane	68573-23-9	3	721792	923008	851896	726557	765366	751961	-
MWStz294	337.15	177.05	336.147	C20H20N2O3	[M+H]+	N-Feruloyltryptamine	Alkaloids	Phenolamine	53905-13-8	3	267684	283486	247177	269701	220098	235129	-
mws1433	314.14	177.05	313.131	C18H19NO4	[M+H]+	N-Feruloyltyramine; Moupinamide*	Alkaloids	Phenolamine	66648-43-9	3	257456	274166	205432	207280	235881	233829	C02717
Walbp01542	286.09	124.04	286.093	C12H16NO7+	[M]+	N-Glucosylnicotinate*	Alkaloids	Pyridine alkaloids	-	1	8.34043e+06	9.74512e+06	8.80564e+06	8.71391e+06	9.23641e+06	9.07617e+06	C03003
Walbp01749	286.09	124.04	286.093	C12H16NO7+	[M]+	N-Glucosylpicolinate*	Alkaloids	Pyridine alkaloids	-	1	4.40692e+06	5.04887e+06	4.19955e+06	4.79346e+06	3.77628e+06	4.76694e+06	-
mws0736	189.12	86.1	188.116	C8H16N2O3	[M+H]+	N-Glycyl-L-leucine*	Amino acids and derivatives	Amino acids and derivatives	869-19-2	1	1.6455e+07	1.82733e+07	1.68398e+07	1.7548e+07	1.83098e+07	1.73278e+07	C02155
MWSmce338	146.08	70.065	145.074	C6H11NO3	[M+H]+	N-Hydroxypipecolic acid	Alkaloids	Piperidine alkaloids	115819-92-6	3	57955.2	64951.1	65849.8	88498.2	35537.8	72520	-
Zahp011321	228.23	228.24	227.225	C14H29NO	[M+H]+	N-Isobutyl Decanamide	Alkaloids	Alkaloids	73785-31-6	2	70493.4	128366	40024.3	91424.2	127817	60619.8	-
Lmqp000427	146.081	82.0656	145.074	C6H11NO3	[M+H]+	N-Methyl-Trans-4-Hydroxy-L-Proline	Amino acids and derivatives	Amino acids and derivatives	4252-82-8	3	28871.5	42328.6	14455.8	12383.1	27371.3	35364.1	-
Wcdp000832	146.117	100.112	145.11	C7H15NO2	[M+H]+	N-Methylisoleucine	Amino acids and derivatives	Amino acids and derivatives	39554-61-5	3	45924.3	47454.8	48878.8	58052.8	50821	43533.2	-
mws0983	326.31	62.06	325.298	C20H39NO2	[M+H]+	N-Oleoylethanolamine	Alkaloids	Alkaloids	111-58-0	1	3.37895e+06	3.35136e+06	3.2602e+06	3.2281e+06	3.58524e+06	3.37151e+06	C20792
MWS3166	312.26	74.03	313.262	C18H35NO3	[M-H]-	N-Palmitoylglycine	Amino acids and derivatives	Amino acids and derivatives	2441-41-0	3	23163.6	23227.6	22479.7	25594.8	25964.3	22300.4	-
pme2743	194.08	91.05	193.074	C10H11NO3	[M+H]+	N-Phenylacetylglycine	Amino acids and derivatives	Amino acids and derivatives	500-98-1	3	55789.7	55248.2	36057	58504.6	88707.4	43095	C05598
Walbp01859	302.11	147.04	301.106	C15H15N3O4	[M+H]+	N-[4-Hydroxycinnamoyl]-L-Histidine	Alkaloids	Phenolamine	-	2	25640.4	28719.2	38585.2	29847.9	43067.1	43518.1	-
Zbqn004681	245.09	203.08	246.1	C13H14N2O3	[M-H]-	N-acetyl-tryptophan	Amino acids and derivatives	Amino acids and derivatives	-	1	1.04395e+06	1.52133e+06	726713	1.70723e+06	1.39136e+06	1.46087e+06	-
Zbqn000412	160.061	88.04	161.069	C6H11NO4	[M-H]-	N-alanicacidalkyl-alanine	Amino acids and derivatives	Amino acids and derivatives	-	3	16412.4	31612	28914.2	27626.3	24226.3	25127.5	-
Smcp000882	328.13	310.12	327.132	C15H21NO7	[M+H]+	N-benzoyl-2-aminoethyl-β-D-glucopyranoside	Alkaloids	Alkaloids	-	1	5.32517e+06	5.83269e+06	5.83823e+06	5.8845e+06	6.20034e+06	6.50731e+06	-
HJKP000649	136.07	91.05	135.068	C8H9NO	[M+H]+	N-benzylformamide*	Alkaloids	Alkaloids	6343-54-0	3	9.10135e+06	8.49354e+06	1.01848e+07	6.75785e+06	9.36897e+06	7.37245e+06	C15561
Lmgn000160	131.05	70.03	132.054	C4H8N2O3	[M-H]-	N-carbamoyl-b-alanine	Amino acids and derivatives	Amino acids and derivatives	462-88-4	1	127416	110519	122716	117773	114498	120610	C02642
Zbqn003921	250.07	88.04	251.079	C12H13NO5	[M-H]-	N-carboxy-N-(2-oxo-2-phenylethyl)-L-alanine	Amino acids and derivatives	Amino acids and derivatives	-	1	2.1749e+07	2.38483e+07	2.35006e+07	2.24828e+07	2.28293e+07	2.32624e+07	-
ZbWp002423	180.102	120.081	179.095	C10H13NO2	[M+H]+	N-methylphenylalanine	Amino acids and derivatives	Amino acids and derivatives	-	3	106325	166332	217607	218469	139355	233243	-
pmb2893	291.15	119.05	292.154	C14H20N4O3	[M-H]-	N-p-Coumaroylhydroxyagmatine	Alkaloids	Phenolamine	-	3	119835	109937	106898	98855.2	104165	95322.9	-
Lcfp001831	309.15	163.04	308.137	C15H20N2O5	[M+H]+	N-p-Coumaroyllysine	Alkaloids	Phenolamine	-	3	3.66278e+06	3.84522e+06	4.02138e+06	3.67178e+06	3.77519e+06	3.71647e+06	-
MWStz415	328.12	147.05	327.111	C18H17NO5	[M+H]+	N-trans-p-Coumaroyltyrosine	Amino acids and derivatives	Amino acids and derivatives	77201-66-2	1	3.2384e+06	4.22333e+06	3.38513e+06	3.85898e+06	3.1517e+06	3.76255e+06	-
Zmyn000155	173.11	131.08	174.1	C7H14N2O3	[M-H]-	N-α-Acetyl-L-ornithine	Amino acids and derivatives	Amino acids and derivatives	6205-08-9	3	1.65599e+06	1.82808e+06	1.96482e+06	2.03177e+06	1.83573e+06	1.63055e+06	C00437
pmn001726	470.23	334.18	471.237	C25H33N3O6	[M-H]-	N1-Caffeoyl-N10-dihydrocaffeoylspermidine	Alkaloids	Phenolamine	-	3	30920.6	33278.1	28177.5	42829.4	19222	27385.6	-
Lcfp031603	267.13	121.06	266.127	C13H18N2O4	[M+H]+	N5-(4-Methoxybenzyl)glutamine	Amino acids and derivatives	Amino acids and derivatives	-	2	76754.6	61603.4	53157.1	69800.8	83649.5	33281.4	-
Lmcp002302	312.13	180.09	311.123	C12H17N5O5	[M+H]+	N6-(2-Hydroxyethyl)adenosine*	Nucleotides and derivatives	Nucleotides and derivatives	4338-48-1	2	9.26137e+06	9.76455e+06	1.01942e+07	1.02202e+07	9.08063e+06	8.28836e+06	-
pme0122	189.12	126.09	188.116	C8H16N2O3	[M+H]+	N6-Acetyl-L-lysine	Amino acids and derivatives	Amino acids and derivatives	692-04-6	1	1.528e+07	1.62733e+07	1.68379e+07	1.48421e+07	1.69382e+07	1.60328e+07	C02727
pme2060	204.12	136.06	203.117	C10H13N5	[M+H]+	N6-Isopentenyladenine	Nucleotides and derivatives	Nucleotides and derivatives	2365-40-4	3	222023	250991	226750	225206	244725	265547	C04083
Wcfp002357	413.14	162.04	412.134	C15H20N6O8	[M+H]+	N6-Threonylcarbamoyladenosine	Nucleotides and derivatives	Nucleotides and derivatives	24719-82-2	1	6.54514e+06	6.22082e+06	7.68993e+06	6.4251e+06	7.89947e+06	7.25404e+06	-
MWS4354	282.12	150.08	281.112	C11H15N5O4	[M+H]+	N6-methyladenosine	Nucleotides and derivatives	Nucleotides and derivatives	1867-73-8	3	1.05951e+06	1.13762e+06	1.25134e+06	1.31977e+06	1.20807e+06	1.01487e+06	-
pmb0197	298.11	166.07	297.107	C11H15N5O5	[M+H]+	N7-Methylguanosine	Nucleotides and derivatives	Nucleotides and derivatives	20244-86-4	3	988619	799317	982294	651919	951515	867289	C20674
NK10251888	203.15	70.07	202.143	C8H18N4O2	[M+H]+	NG,NG-Dimethyl-L-arginine*	Amino acids and derivatives	Amino acids and derivatives	30315-93-6	2	3.95042e+06	4.50965e+06	4.40111e+06	3.80151e+06	4.51661e+06	4.35553e+06	C03626
MWSHY0017	273.076	153.018	272.068	C15H12O5	[M+H]+	Naringenin (5,7,4'-Trihydroxyflavanone)	Flavonoids	Flavanones	480-41-1	3	105514	104239	127088	122267	142367	103836	C00509
pma0791	521.129	273.076	520.122	C24H24O13	[M+H]+	Naringenin-7-O-(6''-malonyl)glucoside	Flavonoids	Flavanones	-	3	80461	71022.4	73399.1	63857.1	58615.7	66930.5	-
Lmmn004685	343.16	328.13	344.162	C20H24O5	[M-H]-	Nectandrin B	Lignans and Coumarins	Lignans	74683-16-2	3	118918	130135	132117	117059	121455	126705	-
MWSprf004	355.1	163.04	354.095	C16H18O9	[M+H]+	Neochlorogenic acid (5-O-Caffeoylquinic acid)	Phenolic acids	Phenolic acids	906-33-2	1	1.81403e+06	1.62243e+06	1.63213e+06	1.70096e+06	1.73705e+06	1.47536e+06	C17147
MWStz661	195.14	79.05	194.131	C12H18O2	[M+H]+	Neocnidilide*	Others	Lactones	4567-33-3	3	141222	142026	128030	166568	177856	149464	C17002
MWS0700	254.09	206.07	253.081	C9H11N5O4	[M+H]+	Neopterin	Alkaloids	Alkaloids	2009-64-5	3	60574	33750.2	44987.9	41646	50091.4	68423.7	C05926
WaYn005089	447.13	285.08	448.137	C22H24O10	[M-H]-	Neosakuranin	Flavonoids	Chalcones	31187-54-9	3	127449	230756	131251	202522	217855	167550	-
Hmgp002148	479.12	317.06	478.111	C22H22O12	[M+H]+	Nepetin-7-O-alloside*	Flavonoids	Flavones	-	3	394092	443051	459795	537632	584027	446090	-
Hmgp002036	479.12	317.06	478.111	C22H22O12	[M+H]+	Nepetin-7-O-glucoside(Nepitrin)	Flavonoids	Flavones	569-90-4	3	331290	352572	321720	480129	288655	449090	-
MWSprf057	223.2	81.07	222.198	C15H26O	[M+H]+	Nerolidol	Terpenoids	Sesquiterpenoids	7212-44-4	3	503982	515147	498321	589396	552481	505603	C09704
mws1375	304.15	185.09	303.143	C12H21N3O6	[M+H]+	Nicotianamine	Alkaloids	Alkaloids	34441-14-0	3	36042.2	35981.6	61907.1	63643.2	32694.6	90246.2	C05324
mws0133	123.06	80.05	122.048	C6H6N2O	[M+H]+	Nicotinamide	Others	Vitamin	98-92-0	1	3.06328e+06	3.7268e+06	3.29007e+06	3.27105e+06	3.10703e+06	3.34177e+06	C00153
mws0711	139.05	106.03	138.043	C6H6N2O2	[M+H]+	Nicotinamide-N-oxide	Alkaloids	Pyridine alkaloids	1986-81-8	3	37082.9	25661.2	40430.7	45262.5	34652.3	34966.9	-
pma3101	256.08	124.04	256.082	C11H14NO6+	[M]+	Nicotinate D-ribonucleoside	Others	Vitamin	17720-18-2	3	1.68526e+06	1.3145e+06	1.70941e+06	1.409e+06	1.55788e+06	1.47138e+06	C05841
MWSmce016	138.05	78.03	137.048	C7H7NO2	[M+H]+	Nicotinic Acid Methyl Ester(Methyl Nicotinate)	Alkaloids	Pyridine alkaloids	93-60-7	1	283397	365610	459252	353342	425484	477458	-
pme0490	124.04	78.03	123.032	C6H5NO2	[M+H]+	Nicotinic acid (Vitamin B3)	Others	Vitamin	59-67-6	3	1.20399e+06	1.3899e+06	1.28923e+06	1.04708e+06	1.2012e+06	1.16915e+06	C00253
pmb0530	664.12	136.06	663.109	C21H27N7O14P2	[M+H]+	Nicotinic acid adenine dinucleotide	Nucleotides and derivatives	Nucleotides and derivatives	53-84-9	3	205665	157438	149394	145384	168145	185038	C00003
Lmxp005833	383.13	177.05	382.126	C18H22O9	[M+H]+	Ningposide A	Phenolic acids	Phenolic acids	254453-79-7	2	967907	1.10987e+06	960086	1.03757e+06	951262	985488	-
MW0108809	218.09	100.08	219.097	C6H13N5O4	[M-H]-	Nitroarginine	Amino acids and derivatives	Amino acids and derivatives	2149-70-4	3	143597	177283	145628	146119	137658	158339	C03417
mws0043	403.139	373.096	402.132	C21H22O8	[M+H]+	Nobiletin (5,6,7,8,3',4'-Hexamethoxyflavone)	Flavonoids	Flavones	478-01-3	3	37086.2	30005.3	29415.3	30210.7	40845.4	36522.8	C10112
MWSslk171	407.13	227.07	408.142	C20H24O9	[M-H]-	Nodakenin	Lignans and Coumarins	Coumarins	495-31-8	3	27027.9	27123	20543.4	31682.5	34883.2	28053.8	C09279
MWSmce096	219.17	81.07	218.167	C15H22O	[M+H]+	Nootkatone	Terpenoids	Sesquiterpenoids	4674-50-4	3	88420.9	114854	106094	125141	120377	113799	C17914
MWSmce658	193.05	153.02	192.042	C10H8O4	[M+H]+	Noreugenin; 5,7-Dihydroxy-2-Methylchromone	Others	Chromone	1013-69-0	3	24339.5	25102.9	21198.9	32204	27663.7	35026.8	C20462
Hmln101664	697.24	535.18	698.242	C32H42O17	[M-H]-	Nortrachelogenin-4'-O-gentiobioside	Lignans and Coumarins	Lignans	-	3	77640.6	48131.9	52921.5	73559.9	71310.3	64642.5	-
mws4163	665.21	485.15	666.222	C24H42O21	[M-H]-	Nystose	Others	Saccharides	13133-07-8	1	4.09148e+06	3.1462e+06	3.46435e+06	3.2882e+06	3.39909e+06	3.48013e+06	-
MWS201054	162.08	56.05	161.069	C6H11NO4	[M+H]+	O-Acetyl-L-homoserine	Amino acids and derivatives	Amino acids and derivatives	250736-84-6	3	164180	191271	192194	234084	199039	181709	C01077
mws1050	148.06	88.04	147.053	C5H9NO4	[M+H]+	O-Acetylserine	Amino acids and derivatives	Amino acids and derivatives	5147-00-2	3	56286.1	58087.5	69755	39861.1	62411.5	72444.2	C00979
pmb2819	665.19	218.1	666.201	C27H38O19	[M-H]-	O-Caffeoyl maltotriose	Phenolic acids	Phenolic acids	-	3	23915	17642.9	20395.7	15263.6	23548.6	15365.2	-
pmb0382	339.09	177.05	338.079	C19H14O6	[M+H]+	O-Feruloyl 4-hydroxycoumarin	Lignans and Coumarins	Coumarins	-	3	6.78761e+06	7.55966e+06	7.25823e+06	6.26943e+06	7.2303e+06	7.17592e+06	-
Wasn003200	385.08	209.03	386.085	C16H18O11	[M-H]-	O-Feruloylgalactaric acid	Phenolic acids	Phenolic acids	-	3	63645.3	83340.5	79261.6	75979.7	84696.4	72096.9	C03156
pmb1754	184.07	125	184.073	C5H15NO4P+	[M]+	O-Phosphocholine	Alkaloids	Alkaloids	107-73-3	3	135810	127616	131367	164330	148495	144380	C00588
MWS20633g	262.05	216.04	261.04	C9H12NO6P	[M+H]+	O-phosphate-L-tyrosine	Amino acids and derivatives	Amino acids and derivatives	21820-51-9	3	948074	741902	921517	674926	983018	730355	C06501
Lmyn012331	281.25	281.25	282.256	C18H34O2	[M-H]-	Octadec-6-enoic acid; Petroselinic acid*	Lipids	Free fatty acids	593-39-5	2	2.63702e+06	2.77033e+06	2.70759e+06	2.68158e+06	2.65788e+06	2.59666e+06	C08363
Wccp011838	282.28	69.07	281.272	C18H35NO	[M+H]+	Octadec-8-enamide	Alkaloids	Alkaloids	-	1	6.9932e+06	1.27372e+07	1.08243e+07	9.49895e+06	9.29186e+06	8.73017e+06	-
pmb1650	279.23	149.13	278.225	C18H30O2	[M+H]+	Octadeca-11E,13E,15Z-trienoic acid	Lipids	Free fatty acids	25575-00-2	3	1.80669e+07	1.86137e+07	1.84552e+07	1.87877e+07	1.90804e+07	1.85125e+07	-
Wcdp010708	263.24	81.07	262.23	C18H30O	[M+H]+	Octadeca-2,9,12,15-tetraen-1-ol	Others	Others	-	1	4.1505e+06	3.9921e+06	3.90715e+06	3.73784e+06	3.73264e+06	3.90053e+06	-
Wcdp009119	279.23	81.07	278.225	C18H30O2	[M+H]+	Octadeca-9,12,15-trienoic acid	Lipids	Free fatty acids	28290-79-1	1	16259.4	22013.1	25959.3	24900.1	22232.3	18664	-
Zahp012577	280.26	81.07	279.256	C18H33NO	[M+H]+	Octadecadienamide	Alkaloids	Alkaloids	-	2	1.26157e+06	2.43997e+06	1.82538e+06	1.28232e+06	1.4803e+06	1.50867e+06	-
Wafn002902	497.223	305.161	438.21	C19H34O11	[M+CH3COOH-H]-	Octanoyl arabinosylglucoside	Others	Saccharides	-	3	32958	51863.9	37467.3	43225.6	42301.6	76305.5	-
Walbn00312	239.08	59.01	240.084	C8H16O8	[M-H]-	Octose*	Others	Saccharides	6291-04-9	1	305721	342733	347178	359413	362497	354527	-
YC512118	282.28	247.24	281.272	C18H35NO	[M+H]+	Oleamide (9-Octadecenamide)	Lipids	Free fatty acids	301-02-0	2	936481	1.86734e+06	1.45197e+06	1.42246e+06	1.41364e+06	1.30824e+06	C19670
Smnn005560	539.17	377.12	540.184	C25H32O13	[M-H]-	Oleuropein	Terpenoids	Monoterpenoids	32619-42-4	3	853296	706494	769823	698640	645195	731108	C09794
pmn001368	699.25	537.2	700.258	C32H44O17	[M-H]-	Olivil-4,4'-Di-O-glucoside	Lignans and Coumarins	Lignans	-	3	48654.5	44988.9	59178.4	49170.7	55543.9	44617.1	-
Sacn004878	639.19	477.16	640.2	C29H36O16	[M-H]-	Orobanchoside	Phenolic acids	Phenolic acids	-	2	333465	394554	256670	422774	390090	398094	C10481
pme2165	155.01	111.02	156.017	C5H4N2O4	[M-H]-	Orotic acid (Vitamin B13)	Others	Vitamin	65-86-1	3	138497	102846	151698	104026	138433	119896	C00295
pmf0096	88.99	70.98	89.9953	C2H2O4	[M-H]-	Oxalic acid	Organic acids	Organic acids	144-62-7	3	47058	63896.5	67448.8	55127.4	63136.5	71367.5	C00209
MWS0132	611.15	306.07	612.152	C20H32N6O12S2	[M-H]-	Oxiglutatione	Amino acids and derivatives	Amino acids and derivatives	27025-41-8	3	277104	207001	252898	280611	248714	320912	C00127
MWSmce314	134.06	106.07	133.053	C8H7NO	[M+H]+	Oxindole	Alkaloids	Plumerane	59-48-3	3	59081.2	35087.9	53519.3	50757.4	42196.1	69995.4	C12312
Lmqn009065	435.244	152.994	436.259	C21H41O7P	[M-H]-	PA(18:1/0:0)	Lipids	Glycerol ester	65528-98-5	3	78114.7	83422.6	116700	93305.5	90929.6	94694	-
Lmqn008975	433.23	152.99	434.243	C21H39O7P	[M-H]-	PA(18:2/0:0)	Lipids	Glycerol ester	-	2	859261	1.13879e+06	959274	1.19589e+06	803338	892668	-
Lmqn009021	597.3	597.3	598.312	C27H51O12P	[M-H]-	PI(18:1/0:0)	Lipids	Glycerol ester	-	2	273741	282655	168131	240189	207383	224723	-
Lhjp111601	447.096	175.039	446.088	C18H22O11S	[M+H]+	Paederoside	Terpenoids	Monoterpenoids	20547-45-9	3	107632	78998.3	87556.1	83542.7	89581.9	91753	C09795
pme2827	239.24	223.24	240.245	C16H32O	[M-H]-	Palmitaldehyde	Lipids	Free fatty acids	629-80-1	3	1.17057e+07	1.64428e+07	1.15008e+07	1.84803e+07	1.9349e+07	2.05465e+07	C00517
mws1488	255.23	237.22	256.24	C16H32O2	[M-H]-	Palmitic acid	Lipids	Free fatty acids	57-10-3	3	372794	323348	387978	384718	376063	379221	C00249
Zmyn005015	298.27	254.25	299.282	C18H37NO2	[M-H]-	Palmitoylethanolamide	Lipids	Free fatty acids	544-31-0	3	75200.7	73033.4	74321.9	70557.7	65620.6	73138.2	C16512
Sazp000968	434.16	272.11	433.158	C18H27NO11	[M+H]+	Passibiflorin	Alkaloids	Isoquinoline alkaloids	-	3	1.32608e+07	1.17271e+07	13654300	1.2958e+07	1.36651e+07	1.24169e+07	-
pmp001226	445.21	252.1	444.205	C27H28N2O4	[M+H]+	Patriscabratine	Alkaloids	Alkaloids	912353-09-4	1	30150.6	39121.1	35879	27017.1	39347.7	33816.7	-
Hmgp001902	477.14	315.09	476.132	C23H24O11	[M+H]+	Pectolinarigenin-7-O-glucoside	Flavonoids	Flavones	-	3	3.14478e+06	3.3537e+06	3.64421e+06	3.2229e+06	3.1698e+06	3.06542e+06	-
MWSslk248	649.4	487.35	650.403	C36H58O10	[M-H]-	Pedunculoside	Terpenoids	Triterpene Saponin	42719-32-4	3	129211	159806	153407	144377	159048	179752	-
mws0359	241.22	241.22	242.225	C15H30O2	[M-H]-	Pentadecanoic Acid	Lipids	Free fatty acids	1002-84-2	3	994953	952717	1.08576e+06	1.07138e+06	961515	942833	C16537
Smsn005712	395.008	315.05	396.015	C16H12O10S	[M-H]-	Persicarin (Isohamnetin-3-O-sulfate)	Flavonoids	Flavonols	549-31-5	3	27519	48705	32270.2	56813.2	47294.9	49994	-
mws1454	477.14	315.09	478.147	C23H26O11	[M-H]-	Persicoside	Flavonoids	Flavanones	28978-03-2	3	9085.31	23493	18464.8	22053.2	15767.8	23063.9	-
Xmqp003266	427.16	265.11	426.153	C20H26O10	[M+H]+	Peucedanol 7-O-glucoside	Lignans and Coumarins	Coumarins	65853-04-5	3	111488	168362	165881	126947	211068	141063	-
MWS201447	237.12	120.09	236.116	C12H16N2O3	[M+H]+	Phe-Ala	Amino acids and derivatives	Amino acids and derivatives	3918-87-4	1	2.14924e+06	2.51933e+06	2.36805e+06	2.5135e+06	2.77738e+06	2.5293e+06	-
MW0155118	352.15	163.04	351.143	C16H21N3O6	[M+H]+	Phe-Asp-Ala	Amino acids and derivatives	Amino acids and derivatives	-	3	140486	140935	126691	151336	126832	143518	-
Zbqp002379	294.14	120.08	293.138	C14H19N3O4	[M+H]+	Phe-Gln	Amino acids and derivatives	Amino acids and derivatives	-	3	75496.8	117179	106211	130772	113100	129823	-
MW0109108	379.21	295.16	378.202	C17H26N6O4	[M+H]+	Phe-Gly-Arg	Amino acids and derivatives	Amino acids and derivatives	-	3	4.63473e+06	5.18009e+06	4.99398e+06	5.1823e+06	4.97046e+06	5.01461e+06	-
MW0155444	280.13	175.09	279.122	C13H17N3O4	[M+H]+	Phe-Gly-Gly	Amino acids and derivatives	Amino acids and derivatives	23576-42-3	3	1.75144e+06	1.6968e+06	1.76531e+06	1.73389e+06	1.86032e+06	1.71432e+06	-
MWS201439	303.15	156.08	302.138	C15H18N4O3	[M+H]+	Phe-His	Amino acids and derivatives	Amino acids and derivatives	16874-81-0	3	43028.3	49011.3	67411.5	37077.7	50549.3	66340.8	-
MWS201483	279.13	120.08	278.127	C14H18N2O4	[M+H]+	Phe-Hyp	Amino acids and derivatives	Amino acids and derivatives	90965-82-5	3	647305	603265	625920	631839	705588	615104	-
MWS201458	279.17	120.09	278.163	C15H22N2O3	[M+H]+	Phe-Ile	Amino acids and derivatives	Amino acids and derivatives	22951-94-6	2	33382	32172.7	43662	40975	44105.5	36114.9	-
MW0155337	340.15	120.08	339.143	C15H21N3O6	[M+H]+	Phe-Ser-Ser	Amino acids and derivatives	Amino acids and derivatives	-	3	1.59458e+06	1.70761e+06	1.67082e+06	1.48916e+06	1.64033e+06	1.56503e+06	-
MW0109233	352.17	120.08	351.158	C20H21N3O3	[M+H]+	Phe-Trp	Amino acids and derivatives	Amino acids and derivatives	-	3	4.6394e+06	3.82887e+06	4.30431e+06	4.13077e+06	4.23841e+06	4.60859e+06	-
MW0109145	380.18	218.1	379.174	C18H25N3O6	[M+H]+	Phe-Val-Asp	Amino acids and derivatives	Amino acids and derivatives	-	3	1.6246e+06	1.6362e+06	1.6313e+06	1.54294e+06	1.65378e+06	1.79788e+06	-
Lacn004858	535.181	373.128	536.189	C26H32O12	[M-H]-	Phellavin	Flavonoids	Flavanonols	-	3	1.63562e+06	1.96394e+06	1.63313e+06	1.68588e+06	1.73489e+06	1.8636e+06	-
Lmhn003990	367.1	191.07	368.111	C17H20O9	[M-H]-	Phellodenol E	Lignans and Coumarins	Coumarins	778637-83-5	3	864150	818598	834612	820678	799944	840807	-
Lmhn003439	367.1	193.06	368.111	C17H20O9	[M-H]-	Phellodenol H	Lignans and Coumarins	Coumarins	917092-48-9	3	1.03898e+06	1.19379e+06	1.08377e+06	1.15428e+06	1.23012e+06	1.19405e+06	-
mws1505	283.1	135.04	284.105	C17H16O4	[M-H]-	Phenethyl caffeate	Phenolic acids	Phenolic acids	104594-70-9	1	300613	354067	322725	333023	308166	332106	C10484
MWSslk008	281.12	175.05	280.11	C18H16O3	[M+H]+	Phenprocoumon	Lignans and Coumarins	Coumarins	435-97-2	3	1.1726e+06	1.30232e+06	1.19878e+06	1.13317e+06	1.25129e+06	1.18856e+06	-
MWS1848	135.05	92.03	136.052	C8H8O2	[M-H]-	Phenyl acetate	Others	Others	122-79-2	3	27172.8	35303.8	27042.2	23473	34708.5	24514.4	C00548
mws0715	263.1	145.06	264.111	C13H16N2O4	[M-H]-	Phenylacetyl-L-glutamine	Amino acids and derivatives	Amino acids and derivatives	28047-15-6	3	41359.1	41944.6	36545.1	30982.5	32374.8	27767.9	C04148
Hmhn003067	325.09	119.05	326.1	C15H18O8	[M-H]-	Phenylpropionic acid-O-β-D-glucopyranoside	Phenolic acids	Phenolic acids	-	2	89758.3	77960.7	81655	73488	76117.9	70770.8	-
pme1201	273.08	167.03	274.084	C15H14O5	[M-H]-	Phloretin	Flavonoids	Chalcones	60-82-2	3	13391.3	12498.4	11921.5	14457.8	13462.5	15571.9	C00774
mws2118	435.13	167.04	436.137	C21H24O10	[M-H]-	Phloretin-2'-O-glucoside (Phlorizin)	Flavonoids	Chalcones	60-81-1	3	29402.7	29722.9	33561.5	40541	34338	29603.7	C01604
NK10264324	127.04	81.03	126.032	C6H6O3	[M+H]+	Phloroglucinol	Others	Others	108-73-6	3	103116	52422	75795.7	92025.7	51332.3	44415.1	C02183
Hmhn000927	287.08	125.02	288.084	C12H16O8	[M-H]-	Phloroglucinol-1-O-β-D-glucopyranoside	Others	Others	-	3	29253.3	51927.2	37283.7	33533.7	24498.1	29212.4	-
pmp001285	149.02	65.04	148.016	C8H4O3	[M+H]+	Phthalic anhydride	Phenolic acids	Phenolic acids	85-44-9	1	329636	408894	292542	347232	309842	300145	-
mws0131	297.32	251.14	296.308	C20H40O	[M+H]+	Phytol	Lipids	Free fatty acids	7541-49-3	3	129551	118306	118351	125843	115721	114159	C01389
Lmln001195	297.1	135.07	298.105	C14H18O7	[M-H]-	Picein	Others	Ketone compounds	530-14-3	3	56630.8	63825.6	43091.6	68770.2	51903.2	74221.7	C10720
Qazp004814	513.16	163.04	512.153	C23H28O13	[M+H]+	Picroside II	Terpenoids	Monoterpenoids	-	3	115210	150342	164276	183669	144285	145513	-
Lmbn014696	301.217	301.217	302.225	C20H30O2	[M-H]-	Pimaric acid*	Terpenoids	Ditepenoids	127-27-5	3	190793	186425	205898	152849	171831	155284	C09159
Zmjn001813	159.07	97.06	160.074	C7H12O4	[M-H]-	Pimelic acid	Lipids	Free fatty acids	111-16-0	3	19848.7	22054.8	20932.6	22353.3	13103.5	14946.6	C02656
MWSHY0124	257.08	153.02	256.074	C15H12O4	[M+H]+	Pinocembrin (Dihydrochrysin)	Flavonoids	Flavanones	480-39-7	1	396925	403151	422693	412914	387190	402223	C09827
MW0169676	279.23	81.07	278.225	C18H30O2	[M+H]+	Pinolenic acid	Lipids	Free fatty acids	16833-54-8	3	1.0933e+07	1.12834e+07	1.11557e+07	1.20792e+07	1.1411e+07	1.10308e+07	-
mws0097	357.13	151.04	358.142	C20H22O6	[M-H]-	Pinoresinol*	Lignans and Coumarins	Lignans	487-36-5	3	66306.3	60147.2	66949.7	56837.8	50908	58307.1	C05366
pmn001370	681.24	519.19	682.247	C32H42O16	[M-H]-	Pinoresinol-4,4'-O-diglucoside	Lignans and Coumarins	Lignans	63902-38-5	3	49054.7	54408.6	47781.3	39036.8	49867.6	60322.7	-
Ysjp000315	130.1	56.05	129.079	C6H11NO2	[M+H]+	Pipecolic acid	Alkaloids	Piperidine alkaloids	535-75-1	3	320577	364467	347838	311805	298905	350747	-
pmb0782	86.1	69.07	85.0891	C5H11N	[M+H]+	Piperidine	Alkaloids	Piperidine alkaloids	110-89-4	3	2.12263e+06	2.02311e+06	1.98218e+06	1.87273e+06	2.34786e+06	1.98327e+06	C01746
Zbdp002392	167.032	123.044	166.027	C8H6O4	[M+H]+	Piperonylic acid	Organic acids	Organic acids	94-53-1	3	243280	242180	259773	260992	220408	258718	-
Labp004843	535.27	211.17	534.268	C25H42O12	[M+H]+	Platanionoside B	Terpenoids	Sesquiterpenoids	-	3	735378	770007	575949	792550	991311	932052	-
Qazn005429	769.25	607.198	770.263	C35H46O19	[M-H]-	Poliumoside	Phenolic acids	Phenolic acids	94079-81-9	3	157270	114822	186315	116232	145159	150809	-
Lcsp001958	343.2	70.07	342.19	C15H26N4O5	[M+H]+	Pro-Asn-Leu	Amino acids and derivatives	Amino acids and derivatives	-	3	336352	438820	403092	439510	334405	341886	-
MW0155809	360.14	120.08	359.133	C14H21N3O8	[M+H]+	Pro-Asp-Glu	Amino acids and derivatives	Amino acids and derivatives	-	3	571600	633530	584330	924773	598998	612863	-
MW0155854	382.17	220.12	381.165	C16H23N5O6	[M+H]+	Pro-Glu-His	Amino acids and derivatives	Amino acids and derivatives	-	3	1.28256e+07	1.25647e+07	1.52778e+07	1.24014e+07	1.44597e+07	1.19088e+07	-
Lcsp002236	358.2	70.07	357.19	C16H27N3O6	[M+H]+	Pro-Glu-Ile	Amino acids and derivatives	Amino acids and derivatives	-	3	1.47887e+06	1.74977e+06	1.61585e+06	1.68891e+06	1.63918e+06	1.61472e+06	-
MW0155868	286.18	116.07	285.169	C13H23N3O4	[M+H]+	Pro-Gly-Leu	Amino acids and derivatives	Amino acids and derivatives	-	3	679869	642014	708273	603804	734132	724833	-
MW0155871	320.16	70.06	319.153	C16H21N3O4	[M+H]+	Pro-Gly-Phe	Amino acids and derivatives	Amino acids and derivatives	-	3	3.12922e+06	3.51994e+06	3.33036e+06	3.39547e+06	3.38219e+06	3.48285e+06	-
MW0155877	382.17	163.04	381.165	C16H23N5O6	[M+H]+	Pro-His-Glu	Amino acids and derivatives	Amino acids and derivatives	-	3	628138	688380	692391	504282	653581	554064	-
MEDL00444	229.15	183.15	228.147	C11H20N2O3	[M+H]+	Pro-Ile	Amino acids and derivatives	Amino acids and derivatives	-	3	215780	231729	225771	245909	258943	229001	-
Lcsp001705	344.18	70.06	343.174	C15H25N3O6	[M+H]+	Pro-Ile-Asp	Amino acids and derivatives	Amino acids and derivatives	-	3	16266.9	30760.6	20850.9	74997.6	26598.6	48363.7	-
Lcsp001647	330.2	116.07	329.195	C15H27N3O5	[M+H]+	Pro-Leu-Thr	Amino acids and derivatives	Amino acids and derivatives	-	3	29193.8	35103.4	36611.1	36527.1	69055.6	39417.4	-
MW0155979	326.21	213.12	325.2	C16H27N3O4	[M+H]+	Pro-Pro-Leu	Amino acids and derivatives	Amino acids and derivatives	-	3	9.92069e+06	1.09325e+07	1.04197e+07	1.0832e+07	1.03708e+07	1.05439e+07	-
Lcsp002508	330.2	70.06	329.195	C15H27N3O5	[M+H]+	Pro-Thr-Ile	Amino acids and derivatives	Amino acids and derivatives	-	3	696650	814113	811748	773843	764148	728547	-
MWS201466	302.15	188.07	301.143	C16H19N3O3	[M+H]+	Pro-Trp	Amino acids and derivatives	Amino acids and derivatives	35310-39-5	3	142283	159274	152540	174904	148061	166131	-
MW0156025	394.16	179.05	393.154	C18H23N3O7	[M+H]+	Pro-Tyr-Asp	Amino acids and derivatives	Amino acids and derivatives	-	3	1.40441e+07	1.50884e+07	1.39612e+07	1.54381e+07	1.41559e+07	1.51875e+07	-
Lcsp003475	328.22	169.14	327.216	C16H29N3O4	[M+H]+	Pro-Val-Leu	Amino acids and derivatives	Amino acids and derivatives	-	3	216152	272792	248822	208707	261689	197936	-
pme0434	577.14	407.08	578.142	C30H26O12	[M-H]-	Procyanidin B2	Tannins	Proanthocyanidins	29106-49-8	3	21087.3	17449.8	22906.2	22308.7	26021.9	17575	C17639
Lcsp000522	213.12	70.07	212.116	C10H16N2O3	[M+H]+	Prolylproline	Amino acids and derivatives	Amino acids and derivatives	20488-28-2	3	168151	185387	230417	206275	173962	179798	-
MWS2070	179.07	92.03	180.079	C10H12O3	[M-H]-	Propyl 4-hydroxybenzoate	Phenolic acids	Phenolic acids	94-13-3	3	27912.1	25408.9	24784.2	22921.2	24654.1	29569.6	-
MWSHC2067	139.039	65.0386	138.032	C7H6O3	[M+H]+	Protocatechualdehyde	Others	Aldehyde compounds	139-85-5	3	84088.1	79088.3	79121.4	58188.9	88825.8	82645.6	C16700
Wasn002449	461.13	152.01	462.137	C19H26O13	[M-H]-	Protocatechuic acid 1-O-Rutinoside	Phenolic acids	Phenolic acids	-	3	103902	102201	105533	98886.4	97808.4	105209	-
MWStz371	315.07	153.02	316.079	C13H16O9	[M-H]-	Protocatechuic acid 4-O-beta-glucoside*	Phenolic acids	Phenolic acids	7361-59-3	1	1.82631e+06	2.08203e+06	2.0865e+06	1.8043e+06	2.03995e+06	1.83643e+06	-
Lakn002165	447.12	152.01	448.122	C18H24O13	[M-H]-	Protocatechuic acid glucosyl xyloside*	Phenolic acids	Phenolic acids	-	1	639053	747125	754288	957315	748727	767696	-
pmn001367	315.072	153.017	316.079	C13H16O9	[M-H]-	Protocatechuic acid-4-O-glucoside*	Phenolic acids	Phenolic acids	-	1	1.72749e+06	1.98569e+06	1.70495e+06	1.5819e+06	1.98195e+06	1.88614e+06	-
mws0918	283.06	268.04	284.068	C16H12O5	[M-H]-	Prunetin (5,4'-Dihydroxy-7-methoxyisoflavone)	Flavonoids	Isoflavones	552-59-0	3	178629	204054	170477	166901	199181	181191	C10521
pmb0889	279.23	95.09	278.225	C18H30O2	[M+H]+	Punicic acid (9Z,11E,13Z-octadecatrienoic acid)	Lipids	Free fatty acids	544-72-9	3	1.08659e+06	1.20054e+06	1.16109e+06	1.20354e+06	1.10191e+06	1.13285e+06	C08364
Lmdn002671	785.251	623.223	786.258	C35H46O20	[M-H]-	Purpureaside C*	Phenolic acids	Phenolic acids	108648-07-3	3	52049.4	64840.5	66663.1	54260.7	74851	61326.8	C10488
pme2292	89.11	72.08	88.1	C4H12N2	[M+H]+	Putrescine	Alkaloids	Alkaloids	110-60-1	3	177115	165754	195788	197772	194051	191075	C00134
zjgp122327	286.09	124.04	285.085	C12H15NO7	[M+H]+	Pyridine-4-formyl-O-β-D-glucopyranoside	Others	Others	-	3	7.47864e+06	8.84363e+06	7.90324e+06	8.14779e+06	8.19361e+06	8.74558e+06	-
Zmjp000624	168.06	150.05	167.058	C8H9NO3	[M+H]+	Pyridoxal	Others	Vitamin	66-72-8	3	268835	188738	225237	172595	221417	182519	C00250
mws0655	246.02	96.97	247.025	C8H10NO6P	[M-H]-	Pyridoxal-5'-phosphate	Others	Vitamin	54-47-7	3	32325.9	31698.9	43500	36632.8	35749.4	28754.4	C00018
pme1383	170.08	134.06	169.074	C8H11NO3	[M+H]+	Pyridoxine	Others	Vitamin	65-23-6	3	349998	432046	400379	320795	451437	402511	C00314
pmb0789	332.13	152.07	331.127	C14H21NO8	[M+H]+	Pyridoxine-5'-O-glucoside	Others	Vitamin	-	3	599755	594116	702569	556389	658853	552199	C03996
pme1306	250.05	134.06	249.04	C8H12NO6P	[M+H]+	Pyridoxine-5'-phosphate	Others	Vitamin	447-05-2	3	102370	110106	81228	102085	83535.8	117510	C00627
Lcfn121082	241.12	197.13	242.127	C11H18N2O4	[M-H]-	PyroGlu-Ile	Amino acids and derivatives	Amino acids and derivatives	-	1	1.7545e+06	1.93751e+06	2.18643e+06	1.9009e+06	1.93506e+06	1.98308e+06	-
mws4516	130.05	84.05	129.043	C5H7NO3	[M+H]+	Pyroglutamic acid	Amino acids and derivatives	Amino acids and derivatives	4042-36-8	3	4.8921e+06	5.99458e+06	7.61682e+06	5.91287e+06	6.38869e+06	5.78505e+06	-
mws0601	110.02	66.03	111.032	C5H5NO2	[M-H]-	Pyrrole-2-carboxylic acid	Alkaloids	Pyrrole alkaloids	634-97-9	3	14769.3	15298.8	18221.6	20312.9	15435.2	21078.5	C05942
MWS1860	72.08	55.05	71.0735	C4H9N	[M+H]+	Pyrrolidin	Alkaloids	Pyrrole alkaloids	123-75-1	3	468080	450774	450215	468096	417359	501282	-
MWSmce148	193.08	161.05	194.079	C7H14O6	[M-H]-	Quebrachitol	Others	Saccharides	642-38-6	3	5561.44	8342	10624.6	13347.7	14081.8	9517.83	C08257
MWSHY0151	319.04	273.04	318.038	C15H10O8	[M+H]+	Quercetagetin; 3,3',4',5,6,7-Hexahydroxyflavone	Flavonoids	Flavonols	90-18-6	3	733006	702815	693546	806558	825382	821070	C10122
Lmmp003091	611.16	303.05	610.153	C27H30O16	[M+H]+	Quercetin-3-O-(4''-O-glucosyl)rhamnoside	Flavonoids	Flavonols	59262-54-3	3	66140.1	38555.4	42237	29256.6	59177.7	69347.8	C17563
Lmdp003286	465.1	303.06	464.096	C21H20O12	[M+H]+	Quercetin-3-O-alloside; Isohyperoside*	Flavonoids	Flavonols	35589-21-0	3	324749	206399	218830	331899	264186	203030	-
MWSHY0113	465.102	303.058	464.096	C21H20O12	[M+H]+	Quercetin-3-O-galactoside (Hyperin)*	Flavonoids	Flavonols	482-36-0	3	267083	251935	206190	349280	248124	313791	C10073
MWSHY0046	465.103	303.051	464.096	C21H20O12	[M+H]+	Quercetin-3-O-glucoside (Isoquercitrin)*	Flavonoids	Flavonols	482-35-9	3	496823	536335	501309	646924	562086	496170	C05623
pmn001583	609.15	300.03	610.153	C27H30O16	[M-H]-	Quercetin-3-O-robinobioside	Flavonoids	Flavonols	52525-35-6	2	95926.1	98076.1	60791.4	106464	83767.1	86285.5	-
mws0059	609.15	301.04	610.153	C27H30O16	[M-H]-	Quercetin-3-O-rutinoside (Rutin)	Flavonoids	Flavonols	153-18-4	2	65403.9	64797.7	58148.1	67670.2	71790.6	75250.1	C05625
MWSHY0162	627.16	303.06	626.148	C27H30O17	[M+H]+	Quercetin-3-O-sophoroside (Baimaside)	Flavonoids	Flavonols	18609-17-1	3	60222.7	89194.2	39014	93235.1	69875.3	75032	C12667
Lmdp003509	435.09	303.06	434.085	C20H18O11	[M+H]+	Quercetin-3-O-xyloside (Reynoutrin)*	Flavonoids	Flavonols	549-32-6	3	110178	77354.4	79992.5	115017	99277.2	99720.9	-
mws0856	463.09	301.04	464.096	C21H20O12	[M-H]-	Quercetin-4'-O-glucoside (Spiraeoside)	Flavonoids	Flavonols	20229-56-5	3	93321.8	62688.6	97709.5	63529.2	81206.6	97983.8	-
Lmfn003760	477.07	301.04	478.075	C21H18O13	[M-H]-	Quercetin-4'-O-glucuronide*	Flavonoids	Flavonols	201463-36-7	3	85213.9	66095.2	61745.8	82216.3	80675.9	84464.3	-
mws1329	463.09	301.04	464.096	C21H20O12	[M-H]-	Quercetin-7-O-glucoside	Flavonoids	Flavonols	491-50-9	3	107223	79639.8	66590.1	84084.5	77206.6	79978.7	C12639
pmb3317	371.1	179.1	372.106	C16H20O10	[M-H]-	Quinacyl syringic acid	Phenolic acids	Phenolic acids	-	3	278351	348253	342922	232946	295625	231969	-
mws0277	191.06	85.03	192.063	C7H12O6	[M-H]-	Quinic Acid	Organic acids	Organic acids	77-95-2	1	2.61254e+07	2.18618e+07	2.38953e+07	2.23277e+07	2.1597e+07	2.31669e+07	C00296
mws0393	325.19	160.08	324.184	C20H24O2N2	[M+H]+	Quinine	Alkaloids	Quinoline alkaloids	130-95-0	3	86719	108178	83072.2	49493.2	70993.5	82364.6	C06526
MWSmce431	204.06	161.05	203.058	C11H9NO3	[M+H]+	Quininic acid; 6-Methoxyquinoline-4-Carboxylic Acid	Alkaloids	Quinoline alkaloids	86-68-0	3	353356	436608	422372	458838	467909	412890	-
MWS5169	172.04	128.05	173.048	C10H7NO2	[M-H]-	Quinoline-4-carboxylic acid	Alkaloids	Quinoline alkaloids	486-74-8	3	16439.6	14395.7	9853.07	20968.4	18739.5	17588.8	C06414
Lmhn007973	631.38	631.39	632.392	C36H56O9	[M-H]-	Quinovic acid-3-O-rhamnoside	Terpenoids	Triterpene	104055-76-7	3	1.11677e+06	1.39214e+06	1.29795e+06	1.39768e+06	1.43928e+06	1.35367e+06	-
pme2125	503.162	179.055	504.169	C18H32O16	[M-H]-	Raffinose*	Others	Saccharides	512-69-6	1	2.30551e+07	2.23357e+07	2.04671e+07	1.97187e+07	2.14547e+07	2.6996e+07	C00492
Zblp001630	161.116	107.085	160.108	C8H16O3	[M+H]+	Rengyol	Others	Saccharides	93675-85-5	3	327117	376002	419677	403544	386907	347984	C17527
Zbzp000519	156.1	110.07	155.095	C8H13NO2	[M+H]+	Retronecine	Alkaloids	Pyrrole alkaloids	480-85-3	3	750980	609503	1.58435e+06	565002	794281	1.45883e+06	C06177
Lmmn006022	461.11	315.05	462.116	C22H22O11	[M-H]-	Rhamnetin-3-O-rhamnoside	Flavonoids	Flavonols	20188-83-4	3	52592.7	78503.9	59592.9	47058.5	52006.5	54158.1	-
mws0854	163.06	59.01	164.069	C6H12O5	[M-H]-	Rhamnose*	Others	Saccharides	3615-41-6	3	18017.4	22300.8	19066.2	8909.11	16109.7	20578	C00507
MWStz601	445.08	283.03	446.085	C21H18O11	[M-H]-	Rhein-8-O-glucoside	Quinones	Anthraquinone	34298-86-7	3	300694	263219	252503	230151	275953	288477	-
MWSmce004	385.208	160.075	384.205	C22H28N2O4	[M+H]+	Rhynchophylline	Alkaloids	Plumerane	76-66-4	3	390930	298424	352555	422008	448497	419739	C09236
Qmgp102406	353.187	144.08	352.179	C21H24N2O3	[M+H]+	Rhynchophyllionium A	Alkaloids	Plumerane	-	3	83342.1	81365.4	57228.8	70578	55028.6	89141	-
Qmgp102410	355.2	144.08	354.194	C21H26N2O3	[M+H]+	Rhynchophyllionium B*	Alkaloids	Plumerane	-	3	24250.3	22456.3	25954.4	35186.2	41473.7	46417.8	-
Qmgp102429	531.196	369.161	530.19	C26H30N2O10	[M+H]+	Rhynchophylloside C	Alkaloids	Plumerane	-	3	538990	523301	467795	487064	585841	596726	-
Qmgp102432	693.252	531.196	692.243	C32H40N2O15	[M+H]+	Rhynchophylloside D	Alkaloids	Plumerane	-	3	461876	406531	411598	406257	445986	461913	-
Qmgp102503	529.179	367.127	528.174	C26H28N2O10	[M+H]+	Rhynchophylloside K	Alkaloids	Plumerane	-	3	565719	474699	506595	404846	495003	464995	-
Qmgp102502	691.23	529.18	690.227	C32H38N2O15	[M+H]+	Rhynchophylloside L	Alkaloids	Plumerane	-	3	204603	138816	276719	154801	174298	152497	-
mws0213	151.061	59.0139	152.069	C5H12O5	[M-H]-	Ribitol*	Others	Saccharides	488-81-3	3	28954.5	38162.5	25931.2	17496.2	27187.9	41825	C00474
mws0232	377.15	243.09	376.138	C17H20N4O6	[M+H]+	Riboflavin (Vitamin B2)	Others	Vitamin	83-88-5	1	1.4758e+07	1.44473e+07	1.33574e+07	1.35109e+07	1.37788e+07	1.42077e+07	C00255
pme2746	784.15	437.09	785.157	C27H33N9O15P2	[M-H]-	Riboflavin 5'-Adenosine Diphosphate	Nucleotides and derivatives	Nucleotides and derivatives	146-14-5	3	231771	229454	232771	217818	222951	227698	C00016
pmf0289	336.17	148.06	335.159	C15H21N5O4	[M+H]+	Riboprine	Nucleotides and derivatives	Nucleotides and derivatives	7724-76-7	3	295574	275804	282770	285315	350279	302070	C16427
pmc0281	400.15	136.06	399.139	C15H21N5O8	[M+H]+	Ribosyladenosine	Nucleotides and derivatives	Nucleotides and derivatives	-	3	1.01568e+07	1.05424e+07	1.10068e+07	9.75181e+06	1.07208e+07	1.02777e+07	-
Hmln008119	197.12	153.12	198.126	C11H18O3	[M-H]-	Robinlin	Terpenoids	Monoterpenoids	-	3	364188	367507	354903	368031	370713	350889	-
Zmxn004201	649.4	487.34	650.403	C36H58O10	[M-H]-	Rosamultin	Terpenoids	Triterpene Saponin	88515-58-6	3	206170	164049	154200	138182	122337	244004	-
pmn001423	385.19	223.14	386.194	C19H30O8	[M-H]-	Roseoside	Terpenoids	Sesquiterpenoids	54835-70-0	3	933954	894024	930389	1.17826e+06	873293	920130	-
MWS20155	361.09	163.04	360.084	C18H16O8	[M+H]+	Rosmarinic acid	Phenolic acids	Phenolic acids	537-15-5	3	357201	354543	350073	302233	286727	281263	C01850
MWS20156	375.11	163.04	374.1	C19H18O8	[M+H]+	Rosmarinic acid methyl ester	Phenolic acids	Phenolic acids	99353-00-1	3	221403	313482	287724	301448	232329	260379	-
Zbqn007750	487.34	487.34	488.35	C30H48O5	[M-H]-	Rubianol-a	Terpenoids	Triterpene	-	3	1.56395e+06	1.86182e+06	1.60814e+06	1.60941e+06	1.66104e+06	1.65488e+06	-
Zbqn008058	471.35	471.35	472.355	C30H48O4	[M-H]-	Rubianol-f	Terpenoids	Triterpene	-	3	244282	351253	295177	287518	210057	193140	-
Zbqn008252	469.331	469.331	470.34	C30H46O4	[M-H]-	Rubianol-g*	Terpenoids	Triterpene	-	3	1.33579e+06	1.42364e+06	908054	1.32687e+06	1.19977e+06	1.21668e+06	-
Zbqn008164	469.332	469.332	470.34	C30H46O4	[M-H]-	Rubiarbonone E*	Terpenoids	Triterpene	-	3	2.81937e+06	3.2446e+06	3.04508e+06	3.29611e+06	3.10023e+06	3.39021e+06	-
Zbqn010247	457.373	457.373	458.376	C30H50O3	[M-H]-	Rubiatriol	Terpenoids	Triterpene	107694-02-0	3	401554	389252	398282	405382	451215	394658	-
Zbqn008633	513.36	513.36	514.366	C32H50O5	[M-H]-	Rubione C	Terpenoids	Triterpene	-	3	760733	859220	821405	662932	870007	841413	-
Zbqn010206	455.352	455.352	456.36	C30H48O3	[M-H]-	Rubione D*	Terpenoids	Triterpene	-	3	99432.8	111927	110038	79442.6	78987.3	102272	-
Lcsn000626	261	181.05	262.011	C12H6O7	[M-H]-	Rubusin B	Others	Others	-	3	7.66764e+06	1.14529e+07	9.01864e+06	9.43134e+06	8.94505e+06	8.98763e+06	-
Lmqn000351	325.11	59.01	326.121	C12H22O10	[M-H]-	Rutinose	Others	Saccharides	90-74-4	3		16689.2	20912.2	26551.1	23338	23779.3	C08247
pme1286	385.13	250	384.122	C14H20N6O5S	[M+H]+	S-(5'-Adenosy)-L-homocysteine	Amino acids and derivatives	Amino acids and derivatives	979-92-0	1	6.39988e+06	5.90337e+06	5.57368e+06	5.57592e+06	5.77607e+06	6.24218e+06	C00021
mws0582	322.11	130.05	321.099	C11H19N3O6S	[M+H]+	S-(Methyl)glutathione	Amino acids and derivatives	Amino acids and derivatives	2922-56-7	3	263263	245431	294500	176200	287985	192728	C11347
Zmdp000972	136.04	91.05	135.035	C4H9NO2S	[M+H]+	S-Methyl-L-cysteine	Amino acids and derivatives	Amino acids and derivatives	1187-84-4	3	9.96678e+06	8.35327e+06	1.06461e+07	6.81763e+06	1.00524e+07	7.72813e+06	C22040
Zmgn001039	266.09	134.05	267.078	C9H17NO6S	[M-H]-	S-Ribosyl-L-homocysteine	Amino acids and derivatives	Amino acids and derivatives	-	3	814458	1.01945e+06	905324	1.15411e+06	1.01221e+06	911530	C03539
MWS04567g	392.185	246.117	391.178	C16H29N3O6S	[M+H]+	S-hexyl-L-glutathione	Amino acids and derivatives	Amino acids and derivatives	24425-56-7	3	211979	241151	181468	231551	230043	190256	C02886
MWSmce693	151.11	81.07	150.105	C10H14O	[M+H]+	Safranal	Terpenoids	Monoterpenoids	116-26-7	3	142848	174573	133942	166415	151562	144988	C17062
Lmyn006922	447.13	285.08	448.137	C22H24O10	[M-H]-	Sakuranin	Flavonoids	Flavanones	529-39-5	3	229562	251942	215036	270619	206120	222161	C17391
WaYn005726	461.14	337.09	462.153	C23H26O10	[M-H]-	Salicin 6'-O-Ferulate	Phenolic acids	Phenolic acids	-	3	467613	664581	597278	706872	676787	742713	-
WaYn005028	405.12	281.07	406.126	C20H22O9	[M-H]-	Salicin 6'-O-Salicylate	Phenolic acids	Phenolic acids	-	3	38662.7	29678.4	28956.1	31067.4	30350.6	26334.8	-
WaYn006121	461.145	193.051	462.153	C23H26O10	[M-H]-	Salicin 7-O-Ferulate	Phenolic acids	Phenolic acids	-	3	18986	21740.1	29318.1	15630.8	13913.4	12265.7	-
pmb3142	299.08	137.02	300.084	C13H16O8	[M-H]-	Salicylic acid-2-O-glucoside	Phenolic acids	Phenolic acids	10366-91-3	3	809065	1.0096e+06	871503	862475	824448	860356	-
WaYn006011	405.119	137.025	406.126	C20H22O9	[M-H]-	Salicyloylsalicin	Phenolic acids	Phenolic acids	-	3	38918	32557.9	30412.4	26508.3	30322	31396.2	-
Wayn107155	543.15	137.02	544.158	C27H28O12	[M-H]-	Salicyolylsalicortin	Phenolic acids	Phenolic acids	-	3	122145	144278	137833	165468	168190	118199	-
mws2367	299.11	119.05	300.121	C14H20O7	[M-H]-	Salidroside	Others	Alcohol compounds	10338-51-9	3	33022.7	61528.4	38708.5	43069.8	39009.6	42840.4	C06046
Hmsn002598	301.092	139.04	302.1	C13H18O8	[M-H]-	Salirepin	Phenolic acids	Phenolic acids	26652-12-0	3	30015	14177.7	23671.3	15630.7	17019.2	18172.1	-
Yarp005898	579.21	163.04	578.2	C28H34O13	[M+H]+	Salsaside B	Phenolic acids	Phenolic acids	-	3	76012.1	159200	175669	109502	125595	188413	-
Cmcp008329	303.23	257.23	302.225	C20H30O2	[M+H]+	Sandaracopimaric acid*	Terpenoids	Ditepenoids	471-74-9	3	169356	205179	192728	200969	203096	212315	-
Lmtp008626	219.175	203.14	218.167	C15H22O	[M+H]+	Santalal	Others	Aldehyde compounds	59331-83-8	3	117552	111801	121312	110572	90422.3	113417	-
Lhjp111603	391.122	151.038	390.116	C16H22O11	[M+H]+	Scandoside*	Terpenoids	Monoterpenoids	18842-99-4	3	505628	515378	504556	400651	484115	434236	-
Xmjn006948	551.12	161.025	552.127	C28H24O12	[M-H]-	Schizotenuin F	Phenolic acids	Phenolic acids	-	3	77322.3	86444.4	83808.3	106156	88965.7	93564.6	-
MWSmce082	207.06	151.07	206.058	C11H10O4	[M+H]+	Scoparone	Lignans and Coumarins	Coumarins	120-08-1	2	98217	106725	128208	126402	107422	116617	C09311
MWSCX014	193.05	133.03	192.042	C10H8O4	[M+H]+	Scopoletin (7-Hydroxy-6-methoxycoumarin)*	Lignans and Coumarins	Coumarins	92-61-5	1	2.52985e+06	3.00471e+06	2.84141e+06	3.26139e+06	3.18537e+06	2.48009e+06	C01752
MWSmce024	355.1	193.05	354.095	C16H18O9	[M+H]+	Scopoletin-7-O-glucoside (Scopolin)	Lignans and Coumarins	Coumarins	531-44-2	3	2.21394e+06	1.97753e+06	2.37348e+06	3.32515e+06	2.63893e+06	1.80789e+06	C01527
MWSslk200	287.056	123.009	286.048	C15H10O6	[M+H]+	Scutellarein (5,6,7,4'-Tetrahydroxyflavone)	Flavonoids	Flavones	529-53-3	3	101010	121536	91017.8	85470.1	92293.9	96145.6	C10184
pme0266	201.11	139.11	202.12	C10H18O4	[M-H]-	Sebacic acid	Organic acids	Organic acids	111-20-6	1	12967.9	16404.6	15452.4	16707.6	15608.8	11491.6	C08277
Lmtn003096	523.22	361.14	524.226	C26H36O11	[M-H]-	Secoisolariciresinol 4-O-glucoside	Lignans and Coumarins	Lignans	-	1	797804	925215	704995	674907	849126	764913	-
HJN054	493.21	361.16	494.215	C25H34O10	[M-H]-	Secoisolariciresinol-9'-O-xyloside	Lignans and Coumarins	Lignans	-	3	30269	25348.9	17479.5	33782.9	21735.7	34691.5	-
MWSslk197	405.14	165.05	404.132	C17H24O11	[M+H]+	Secoxyloganin	Terpenoids	Monoterpenoids	58822-47-2	3	240978	263824	263027	243366	223598	294137	-
pmp001230	279.16	121.03	278.152	C16H22O4	[M+H]+	Senkyunolide M	Others	Lactones	146986-60-9	3	6.12699e+06	6.13958e+06	5.90196e+06	6.35512e+06	6.2656e+06	6.1389e+06	-
pmn001455	713.15	550.98	714.159	C37H30O15	[M-H]-	Sequoiaflavone-5-O-glucoside	Flavonoids	Biflavones	-	3	120534	117904	135026	161965	122931	106263	-
MWS201440	235.09	148.06	234.085	C8H14N2O6	[M+H]+	Ser-Glu	Amino acids and derivatives	Amino acids and derivatives	6403-16-3	3	18069.3	16272.7	16525.9	23841.1	25387.6	27632.2	-
Lcsp001578	276.16	132.1	275.148	C11H21N3O5	[M+H]+	Ser-Gly-Ile	Amino acids and derivatives	Amino acids and derivatives	-	3	102787	94642.3	128424	145822	66706.8	114965	-
Lcsp001896	310.14	166.09	309.132	C14H19N3O5	[M+H]+	Ser-Gly-Phe	Amino acids and derivatives	Amino acids and derivatives	-	3	4.15721e+06	4.44216e+06	4.4105e+06	4.43989e+06	4.26686e+06	4.56179e+06	-
Lcsp001096	333.18	173.13	332.17	C13H24N4O6	[M+H]+	Ser-Ile-Asn	Amino acids and derivatives	Amino acids and derivatives	-	3	164748	207866	203393	203447	213120	224536	-
Lcsp001306	334.16	173.13	333.154	C13H23N3O7	[M+H]+	Ser-Ile-Asp	Amino acids and derivatives	Amino acids and derivatives	-	3	1.673e+06	1.38808e+06	1.56819e+06	1.5458e+06	1.62915e+06	1.55305e+06	-
MW0156802	366.2	173.13	365.195	C18H27N3O5	[M+H]+	Ser-Ile-Phe	Amino acids and derivatives	Amino acids and derivatives	-	3	4.49892e+06	5.01075e+06	4.88172e+06	4.97141e+06	4.58914e+06	4.77906e+06	-
MW0109620	217.12	130.09	218.127	C9H18N2O4	[M-H]-	Ser-Leu	Amino acids and derivatives	Amino acids and derivatives	6665-16-3	3	1.05346e+06	1.31253e+06	1.03584e+06	1.15384e+06	1.14045e+06	1.27689e+06	-
MW0109621	375.23	138.06	374.228	C15H30N6O5	[M+H]+	Ser-Leu-Arg	Amino acids and derivatives	Amino acids and derivatives	-	3	44440.2	21042.4	39565.4	20562	53011.8	32940.3	-
Lcsp003090	332.22	173.13	331.211	C15H29N3O5	[M+H]+	Ser-Leu-Leu	Amino acids and derivatives	Amino acids and derivatives	10329-74-5	1	1.29472e+06	1.34178e+06	1.30824e+06	1.04361e+06	1.37318e+06	1.47417e+06	-
MWS201443	234.15	84.08	233.138	C9H19N3O4	[M+H]+	Ser-Lys	Amino acids and derivatives	Amino acids and derivatives	22677-61-8	3	79957.7	106190	96306	101548	93123.8	94378.7	-
Lcsp001621	320.18	189.09	319.174	C13H25N3O6	[M+H]+	Ser-Thr-Ile	Amino acids and derivatives	Amino acids and derivatives	-	3	123757	149223	127229	141601	159329	119305	-
MWS201381	292.13	188.07	291.122	C14H17N3O4	[M+H]+	Ser-Trp	Amino acids and derivatives	Amino acids and derivatives	94421-70-2	3	131790	87266.5	96172.7	76711.9	89668	29460.7	-
MW0157036	205.12	84.99	204.111	C8H16N2O4	[M+H]+	Ser-Val	Amino acids and derivatives	Amino acids and derivatives	51782-06-0	3	1.17978e+06	1.22296e+06	1.06327e+06	1.3439e+06	1.151e+06	1.17883e+06	-
Lcsp002417	318.2	159.11	317.195	C14H27N3O5	[M+H]+	Ser-Val-Leu	Amino acids and derivatives	Amino acids and derivatives	-	1	1.4821e+06	1.71355e+06	1.61903e+06	1.53037e+06	1.14226e+06	1.4983e+06	-
Lhzp102808	355.1	163.04	354.11	C20H18O6	[M+H]+	Sesamin	Lignans and Coumarins	Lignans	607-80-7	3	1.57662e+06	1.54908e+06	1.99308e+06	1.73014e+06	1.83317e+06	1.73785e+06	C10882
MWSslk224	407.15	177.05	406.147	C17H26O11	[M+H]+	Shanzhiside methyl ester	Terpenoids	Monoterpenoids	64421-28-9	3	208013	181609	144162	152258	138450	197644	-
ZbBn000907	253.01	96.97	254.019	C7H11O8P	[M-H]-	Shikimic Acid-3-Phosphate	Organic acids	Organic acids	-	3	29998.4	29638.9	25182	26679.4	28132.8	33275.7	-
mws0154	173.05	93.03	174.053	C7H10O5	[M-H]-	Shikimic acid	Organic acids	Organic acids	138-59-0	3	84259.7	117214	108712	101753	108240	141300	C00493
pmn001473	537.125	315.05	538.132	C24H26O14	[M-H]-	Sibiricaxanthone A	Flavonoids	Other Flavonoids	241125-76-8	3	794683	828172	851784	837979	792847	874065	-
Zmln002252	223.03	149.03	224.032	C10H8O6	[M-H]-	Sideretin (5,7,8-Trihydroxy-6-methoxycoumarin)	Lignans and Coumarins	Coumarins	2177290-23-0	3	227615	190727	209496	213759	188843	221994	C22007
Lmmn005168	335.22	335.22	336.23	C20H32O4	[M-H]-	Siegesbeckic acid	Terpenoids	Ditepenoids	-	3	5.79987e+06	6.12484e+06	6.46698e+06	6.26876e+06	6.13297e+06	6.25688e+06	-
Lmbp002309	371.102	209.048	370.126	C17H22O9	[M+H]+	Sinapaldehyde-4-O-Glucoside	Phenolic acids	Phenolic acids	154461-65-1	3	679246	882553	846367	474584	791158	677057	-
mws4085	223.06	193.02	224.069	C11H12O5	[M-H]-	Sinapic acid	Phenolic acids	Phenolic acids	530-59-6	3	155905	148466	172895	159585	169851	182018	C00482
pmp001214	310.16	251.09	310.165	C16H24NO5+	[M]+	Sinapine	Alkaloids	Phenolamine	18696-26-9	2	28656.7	26754.9	57823.2	36565.3	57523.9	38925.2	C00933
mad2394	501.1	337.05	502.111	C24H22O12	[M-H]-	Sinapoyl-p-coumaroyltartaric acid	Phenolic acids	Phenolic acids	-	3	1.54133e+06	1.70775e+06	1.70823e+06	1.48079e+06	1.67364e+06	1.68169e+06	-
Lmhn002573	399.09	205.04	400.101	C17H20O11	[M-H]-	Sinapoylglucuronic acid	Phenolic acids	Phenolic acids	-	3	20398.6	22895.5	14436.8	20354	22336.2	20238.8	-
Lmhn003802	561.13	337.06	562.132	C26H26O14	[M-H]-	Sinapoylsinapoyltartaric acid	Phenolic acids	Phenolic acids	-	3	429495	467435	434973	428021	404945	415804	-
Lhqp101805	325.09	163.04	324.084	C15H16O8	[M+H]+	Skimmin (7-Hydroxycoumarin-7-O-glucoside)	Lignans and Coumarins	Coumarins	93-39-0	1	1.52868e+07	1.65264e+07	1.64501e+07	1.68456e+07	1.57781e+07	1.6281e+07	-
Lmmn000214	487.17	341.11	488.174	C18H32O15	[M-H]-	Solatriose	Others	Saccharides	528-40-5	3	459751	298616	237108	280798	339111	365539	-
Zmpn000095	261.04	78.96	262.045	C6H15O9P	[M-H]-	Sorbitol-6-phosphate	Others	Saccharides	20479-58-7	3	16635.4	13239.8	15650.5	11282	10301.5	14750.3	C01096
mws0018	203.22	84.08	202.216	C10H26N4	[M+H]+	Spermine	Alkaloids	Alkaloids	71-44-3	3	663722	657423	503587	618752	685125	643652	C00750
Smxp005575	418.26	400.25	417.252	C24H35NO5	[M+H]+	Spiramine T	Alkaloids	Terpenoid alkaloids	-	3	979844	1.28085e+06	903457	1.24785e+06	1.25855e+06	1.29029e+06	-
MWSmce157	144.1	58.06	143.095	C7H13NO2	[M+H]+	Stachydrine	Alkaloids	Pyrrole alkaloids	471-87-4	1	557467	619049	590521	650536	598056	646863	C10172
Lmqn000213	665.21	341.11	666.222	C24H42O21	[M-H]-	Stachyose	Others	Saccharides	470-55-3	1	2.79353e+06	2.09055e+06	2.47999e+06	2.16318e+06	2.34749e+06	2.69886e+06	C01613
Zmzp005934	284.3	102.09	283.288	C18H37NO	[M+H]+	Stearamide	Alkaloids	Alkaloids	124-26-5	2	15136.6	15433.7	19451.2	17290.8	19884.6	19609	C13846
mws1489	283.26	283.26	284.272	C18H36O2	[M-H]-	Stearic Acid	Lipids	Free fatty acids	57-11-4	3	914157	863468	766831	783264	887730	852147	C01530
YC512117	277.22	149.02	276.209	C18H28O2	[M+H]+	Stearidonic acid	Lipids	Free fatty acids	20290-75-9	3	240817	252899	263052	272849	246185	245750	C16300
Wasyqp1765	120.08	77.04	119.073	C8H9N	[M+H]+	Styrylamine	Alkaloids	Alkaloids	83148-11-2	1	287469	322491	299831	280310	283060	289544	-
mws0242	173.08	111.08	174.089	C8H14O4	[M-H]-	Suberic Acid	Lipids	Free fatty acids	505-48-6	3	105011	134609	155852	119458	158114	197721	C08278
MWS04448	232.118	157.086	231.111	C10H17NO5	[M+H]+	Suberylglycine	Amino acids and derivatives	Amino acids and derivatives	60317-54-6	3	44639.5	46339.8	38319.1	42397.3	33863.8	16186	-
mws0192	117.02	73.03	118.027	C4H6O4	[M-H]-	Succinic acid*	Organic acids	Organic acids	110-15-6	1	2.8193e+06	3.6025e+06	3.14682e+06	3.34426e+06	3.32213e+06	3.58189e+06	C00042
Lmcsp00364	275.14	175.12	274.128	C10H18N4O5	[M+H]+	Succinyl arginine	Amino acids and derivatives	Amino acids and derivatives	2478-02-6	3	115511	138096	70080.7	91176.7	171524	118012	C03296
pme3337	384.12	252.07	383.108	C14H17N5O8	[M+H]+	Succinyladenosine	Nucleotides and derivatives	Nucleotides and derivatives	4542-23-8	1	5.42527e+07	4.90021e+07	4.90909e+07	5.30979e+07	4.93585e+07	5.18089e+07	-
mws1089	421.08	241.01	422.082	C12H23O14P	[M-H]-	Sucrose-6-phosphate	Others	Saccharides	-	3	740323	615746	687021	626674	700586	503977	-
mws1526	359.13	197.08	358.126	C16H22O9	[M+H]+	Sweroside	Terpenoids	Monoterpenoids	14215-86-2	3	770202	926321	1.1649e+06	1.05191e+06	1.04452e+06	1.03094e+06	C17071
pmp000695	375.13	177.05	374.121	C16H22O10	[M+H]+	Swertiamarin	Terpenoids	Monoterpenoids	17388-39-5	3	1.4424e+06	1.36984e+06	1.89302e+06	1.28428e+06	1.40034e+06	1.65327e+06	C09800
Zmln000899	343.11	181.05	344.111	C15H20O9	[M-H]-	Syringaldehyde-4-O-glucoside	Others	Aldehyde compounds	-	3	139531	124221	121576	114017	128522	118024	-
MWSHY0042	183.07	140.05	182.058	C9H10O4	[M+H]+	Syringaldehyde; 4-Hydroxy-3,5-Dimethoxybenzaldehyde	Others	Aldehyde compounds	134-96-3	3	84222.8	86596.9	81871.8	46105.7	91559.8	114115	-
MWSHC2047	579.21	417.16	580.216	C28H36O13	[M-H]-	Syringaresinol-4'-O-glucoside; Acanthoside B	Lignans and Coumarins	Lignans	7374-79-0	3	54883	150149	82164.7	109262	85581.4	124310	C10890
mws0011	371.13	209.08	372.142	C17H24O9	[M-H]-	Syringin	Others	Alcohol compounds	118-34-3	3	427605	467234	442067	406012	476024	456055	C01533
Lsmp121705	303.11	141.05	302.1	C13H18O8	[M+H]+	Tachioside	Phenolic acids	Phenolic acids	109194-60-7	2	382733	359615	350294	370728	351562	349389	-
Lmbn000193	103	59.01	104.011	C3H4O4	[M-H]-	Tartronate semialdehyde*	Organic acids	Organic acids	2480-77-5	3	39468	32882.5	38341.5	24635.2	34707.6	28593.8	C01146
Lszp210010	325.14	191.08	324.132	C15H20N2O6	[M+H]+	Tatarine	Alkaloids	Alkaloids	-	3	258420	266011	322122	280961	276984	298323	-
Lmlp006298	516.298	462.269	515.292	C26H45NO7S	[M+H]+	Taurocholic acid	Organic acids	Organic acids	81-24-3	3	153697	171676	150374	156341	169052	150814	-
MWSHY0066	305.065	231.065	304.058	C15H12O7	[M+H]+	Taxifolin(Dihydroquercetin)	Flavonoids	Flavanonols	480-18-2	3	114148	164147	194199	137629	135407	94917.4	C01617
MWSHY0192	269.081	226.068	268.074	C16H12O4	[M+H]+	Tectochrysin	Flavonoids	Flavones	520-28-5	3	30896.4	37415.8	24633.4	27108.8	37727.9	23068.7	C11621
Zbsn007741	299.06	284.03	300.063	C16H12O6	[M-H]-	Tectorigenin*	Flavonoids	Isoflavones	548-77-6	2	112969	147403	116723	134240	132085	135857	C10534
pme0281	165.02	121.03	166.027	C8H6O4	[M-H]-	Terephthalic acid	Phenolic acids	Phenolic acids	100-21-0	3	208627	183852	218439	167400	184425	175968	C06337
Lmsn004901	367.36	367.36	368.365	C24H48O2	[M-H]-	Tetracosanoic Acid (Lignoceric acid)	Lipids	Free fatty acids	557-59-5	3	526620	535406	716549	568068	543622	724597	C08320
Wbtn005728	439.122	277.068	440.132	C20H24O11	[M-H]-	Tetrahydroswertianolin	Flavonoids	Other Flavonoids	189289-76-7	3	158985	197515	215115	164396	213042	235189	-
Sazp000955	272.11	110.06	271.106	C12H17NO6	[M+H]+	Tetraphyllin A*	Alkaloids	Alkaloids	-	1	3.04444e+06	2.81064e+06	3.18029e+06	3.03446e+06	3.15019e+06	2.85528e+06	-
Wmsn000960	785.25	353.09	786.258	C35H46O20	[M-H]-	Teupolioside	Amino acids and derivatives	Amino acids and derivatives	143617-02-1	3	24452.7	6595.54	19097.6	18375.4	22893.9	19246.7	-
Lmcp001538	181.07	138.07	180.065	C7H8N4O2	[M+H]+	Theobromine	Alkaloids	Alkaloids	83-67-0	1	2.40212e+07	2.57654e+07	2.46895e+07	2.43412e+07	2.76176e+07	2.61519e+07	C07480
mws0352	179.06	164.03	180.065	C7H8N4O2	[M-H]-	Theophylline	Alkaloids	Alkaloids	58-55-9	1	4.95326e+06	5.86352e+06	6.07365e+06	5.39958e+06	5.02253e+06	5.11672e+06	C07130
pmb0952	265.11	122.07	265.112	C12H17N4OS+	[M]+	Thiamine (Vitamin B1)	Others	Vitamin	70-16-6	3	602321	572050	485077	581668	531000	555218	C00378
Lcsp001977	362.19	231.1	361.185	C15H27N3O7	[M+H]+	Thr-Glu-Ile	Amino acids and derivatives	Amino acids and derivatives	-	3	181877	108327	195216	127605	131167	145734	-
Zbqp003116	248.16	202.16	247.153	C10H21N3O4	[M+H]+	Thr-Lys	Amino acids and derivatives	Amino acids and derivatives	-	3	10219.9	26183.2	17223.1	26367.6	22659.9	38747.3	-
MW0157726	305.18	131.05	304.175	C12H24N4O5	[M+H]+	Thr-Lys-Gly	Amino acids and derivatives	Amino acids and derivatives	-	3	9.50934e+06	1.08827e+07	1.00522e+07	9.98293e+06	1.05819e+07	9.95632e+06	-
MW0157741	380.15	162.02	379.141	C14H25N3O7S1	[M+H]+	Thr-Met-Glu	Amino acids and derivatives	Amino acids and derivatives	-	3	1.53496e+07	1.61937e+07	1.62276e+07	1.57275e+07	1.54396e+07	1.62957e+07	-
Lcsp002261	306.14	188.07	305.138	C15H19N3O4	[M+H]+	Thr-Trp	Amino acids and derivatives	Amino acids and derivatives	186761-42-2	3	123759	117111	138117	153093	134100	137451	-
MWS201394	283.13	136.08	282.122	C13H18N2O5	[M+H]+	Thr-Tyr	Amino acids and derivatives	Amino acids and derivatives	145295-02-9	1	694391	563562	570910	534810	772189	738545	-
pme0264	243.1	127.05	242.09	C10H14N2O5	[M+H]+	Thymidine	Nucleotides and derivatives	Nucleotides and derivatives	50-89-5	3	2.14894e+06	2.6994e+06	2.41487e+06	2.67696e+06	2.36498e+06	2.45342e+06	C00214
mws0251	127.05	110.02	126.043	C5H6N2O2	[M+H]+	Thymine	Nucleotides and derivatives	Nucleotides and derivatives	65-71-4	3	169037	212656	197472	185072	183509	207540	C00178
pmn001351	449.145	245.083	450.153	C22H26O10	[M-H]-	Torachrysone-8-O-(6''-acetyl)glucoside	Quinones	Naphthol	-	3	200767	180456	213254	220337	200003	222254	-
Hmln003169	387.14	329.14	388.152	C21H24O7	[M-H]-	Trachelogenin	Lignans and Coumarins	Lignans	34209-69-3	3	147894	186041	212872	175362	184554	210122	C10891
mws0216	132.07	86.06	131.058	C5H9NO3	[M+H]+	Trans-4-Hydroxy-L-proline*	Amino acids and derivatives	Amino acids and derivatives	51-35-4	3	84283.4	83043.9	72510.4	89014.7	62826.3	78798.6	C01157
Wasyqn3393	487.15	193.05	488.152	C21H28O13	[M-H]-	Trans-Ferulic Acid 4-O-[Apiosyl-(1->6)-Glucosyl] Ester	Phenolic acids	Phenolic acids	-	1	1.63299e+06	1.85501e+06	1.78036e+06	1.79232e+06	1.81812e+06	1.82451e+06	-
Lmfp000418	342.138	162.075	341.132	C12H23NO10	[M+H]+	Trehalosamine	Others	Saccharides	-	3	81635.9	56887.8	81563.2	54638.4	57802.1	76843	-
mws2523	421.08	241.01	422.082	C12H23O14P	[M-H]-	Trehalose 6-phosphate	Others	Saccharides	4484-88-2	3	1.26398e+06	1.00212e+06	1.02571e+06	1.00676e+06	1.09559e+06	1.18496e+06	C00689
Wacyp11527	403.23	129.02	402.225	C20H34O8	[M+H]+	Tributyl acetylcitrate	Others	Others	77-90-7	1	758302	693648	1.26746e+06	1.26277e+06	537983	692283	-
Wayn004603	477.07	301.04	478.075	C21H18O13	[M-H]-	Tricetin 3'-glucuronide*	Flavonoids	Flavones	-	3	75495.7	86539.3	62283.1	65318.7	108560	68239.9	-
WaYn005543	431.135	307.082	432.142	C22H24O9	[M-H]-	Trichocarposide	Phenolic acids	Phenolic acids	-	3	703357	865773	788492	807752	886525	839727	-
Lmhp206353	493.134	331.081	492.127	C23H24O12	[M+H]+	Tricin-4'-O-glucoside*	Flavonoids	Flavones	-	3	163860	94799.5	132815	123973	86901.4	68609.2	-
pmb0738	699.192	331.081	698.185	C34H34O16	[M+H]+	Tricin-7-O-(2''-Sinapoyl)glucoside	Flavonoids	Flavones	-	3	24024.5	37986.7	35373	56579.6	39751.2	30903.5	-
pmb0736	493.13	331.08	492.127	C23H24O12	[M+H]+	Tricin-7-O-Glucoside*	Flavonoids	Flavones	32769-01-0	3	684296	683147	602682	696440	673897	753148	-
MWS5231	243.16	181.16	244.167	C13H24O4	[M-H]-	Tridecanedioic acid	Lipids	Free fatty acids	505-52-2	1	153435	173304	166152	177328	163880	173602	-
pmp001257	272.22	254.21	271.215	C15H29NO3	[M+H]+	Tridecanoylglycine	Amino acids and derivatives	Amino acids and derivatives	-	3	22930.3	33393.7	17714.5	45007.8	27302.6	17295.9	-
Zmzp000145	189.16	84.08	188.153	C9H20N2O2	[M+H]+	Trimethyllysine	Amino acids and derivatives	Amino acids and derivatives	23284-33-5	1	2.60695e+06	2.62714e+06	2.72343e+06	2.83837e+06	2.77725e+06	2.78181e+06	C03793
Lmyjn03753	165.06	103.06	166.063	C9H10O3	[M-H]-	Tropic acid	Phenolic acids	Phenolic acids	552-63-6	3	21239.7	17049.3	21682.4	20869.5	23507	20454	C01456
MW0158296	319.14	159.09	318.133	C15H18N4O4	[M+H]+	Trp-Asn	Amino acids and derivatives	Amino acids and derivatives	-	3	3.18027e+06	4.46451e+06	4.25469e+06	4.41686e+06	4.17035e+06	4.45195e+06	-
MW0110057	333.16	159.09	332.148	C16H20N4O4	[M+H]+	Trp-Gln	Amino acids and derivatives	Amino acids and derivatives	-	3	4.73095e+06	5.09424e+06	4.93055e+06	4.79958e+06	4.83804e+06	4.74728e+06	-
MW0110113	262.12	159.09	261.111	C13H15N3O3	[M+H]+	Trp-Gly	Amino acids and derivatives	Amino acids and derivatives	7360-09-0	3	758915	631602	676401	671227	668349	668263	-
MW0158301	318.18	159.09	317.174	C17H23N3O3	[M+H]+	Trp-Ile	Amino acids and derivatives	Amino acids and derivatives	64339-42-0	3	2.32447e+06	3.10483e+06	2.51136e+06	2.58746e+06	2.74817e+06	2.83384e+06	-
MW0158310	292.13	159.09	291.122	C14H17N3O4	[M+H]+	Trp-ser	Amino acids and derivatives	Amino acids and derivatives	133101-40-3	3	2.50178e+06	2.87959e+06	2.56126e+06	2.52239e+06	2.57995e+06	2.5975e+06	-
Lazp007726	315.09	300.06	314.079	C17H14O6	[M+H]+	Tupichinol E	Flavonoids	Flavonols	-	3	382618	465687	454099	486803	487506	460531	-
pmp000663	331.23	97.06	330.219	C21H30O3	[M+H]+	Tussilagonone	Terpenoids	Sesquiterpenoids	110042-38-1	3	70195.6	68637.4	71970	69985.6	68579.3	75327.8	-
MWS201480	253.12	136.08	252.111	C12H16N2O4	[M+H]+	Tyr-Ala	Amino acids and derivatives	Amino acids and derivatives	730-08-5	3	580959	707781	748864	778826	739430	684826	-
MWS201474	319.14	156.08	318.133	C15H18N4O4	[M+H]+	Tyr-His	Amino acids and derivatives	Amino acids and derivatives	3788-44-1	2	176663	142417	126971	144313	167996	147958	-
MW0110222	283.13	137.06	282.122	C13H18N2O5	[M+H]+	Tyr-Thr	Amino acids and derivatives	Amino acids and derivatives	-	3	1.03602e+06	1.36413e+06	1.14848e+06	1.24283e+06	1.228e+06	1.08866e+06	-
MW0110225	345.14	136.08	344.137	C18H20N2O5	[M+H]+	Tyr-Tyr	Amino acids and derivatives	Amino acids and derivatives	1050-28-8	3	1.06874e+07	1.18019e+07	1.14237e+07	1.11507e+07	1.02827e+07	1.17111e+07	-
MW0110291	329.15	136.07	328.142	C18H20N2O4	[M+H]+	Tyr-phe	Amino acids and derivatives	Amino acids and derivatives	17355-11-2	3	633849	691738	647317	661333	696422	626469	-
mws2368	137.06	119.05	138.068	C8H10O2	[M-H]-	Tyrosol	Others	Alcohol compounds	501-94-0	3	125743	202104	167342	201340	150779	183380	C06044
Zbqp002380	295.16	136.08	294.158	C15H22N2O4	[M+H]+	Tyrosylleucine	Amino acids and derivatives	Amino acids and derivatives	17355-10-1	1	1.27085e+06	1.4744e+06	1.3724e+06	1.19253e+06	1.30632e+06	1.41972e+06	-
Ytmp206238	489.37	489.37	488.35	C30H48O5	[M+H]+	Uncargenin C; 3β,6β,23-Trihydroxyolean-12-en-28-oic acid	Terpenoids	Triterpene	152243-70-4	3	263845	576668	394265	395940	509512	399557	-
Qmgp102420	383.197	160.078	382.189	C22H26N2O4	[M+H]+	Uncarialin C	Alkaloids	Plumerane	-	3	43287.8	36123.1	40572	43539	49226.1	46988.4	-
Qmgp102418	371.2	209.153	370.189	C21H26N2O4	[M+H]+	Uncarialin J	Alkaloids	Plumerane	-	3	474946	323074	267756	288036	291714	269521	-
MWS1900	215.13	153.13	216.136	C11H20O4	[M-H]-	Undecanedioic acid	Lipids	Free fatty acids	1852-04-6	1	1.90876e+06	2.11199e+06	1.97655e+06	1.94232e+06	1.98889e+06	2.0422e+06	-
mws0752	185.15	185.16	186.162	C11H22O2	[M-H]-	Undecylic Acid	Lipids	Free fatty acids	112-37-8	3	2.51253e+06	2.41304e+06	2.30521e+06	2.35001e+06	2.33469e+06	2.23869e+06	C17715
pme0257	111.02	67.03	112.027	C4H4N2O2	[M-H]-	Uracil	Nucleotides and derivatives	Nucleotides and derivatives	66-22-8	3	81552.1	76398.8	70600.2	84851.1	107036	107188	C00106
mws0248	243.06	110.02	244.07	C9H12N2O6	[M-H]-	Uridine	Nucleotides and derivatives	Nucleotides and derivatives	58-96-8	1	1.02213e+06	1.28876e+06	1.12864e+06	1.41625e+06	1.11756e+06	1.29933e+06	C00299
pme3007	402.99	158.93	404.002	C9H14N2O12P2	[M-H]-	Uridine 5'-diphosphate	Nucleotides and derivatives	Nucleotides and derivatives	27821-45-0	3	39391.5	46819.8	51614.3	32672.3	52522.2	57984.1	C00015
pme3188	323.03	211	324.036	C9H13N2O9P	[M-H]-	Uridine 5'-monophosphate	Nucleotides and derivatives	Nucleotides and derivatives	58-97-9	3	161262	115307	136829	161909	106339	175296	C00105
Lcfp121209	302.21	143.12	301.2	C14H27N3O4	[M+H]+	Val-Ala-Ile	Amino acids and derivatives	Amino acids and derivatives	-	1	19437	24900	23679.3	32516.2	38270	25830.5	-
Lcsp002545	346.2	215.1	345.19	C15H27N3O6	[M+H]+	Val-Asp-Ile	Amino acids and derivatives	Amino acids and derivatives	-	2	52056	83465.3	68575.6	41729.7	67149.1	40753.9	-
Zmmp003140	360.21	261.14	359.206	C16H29N3O6	[M+H]+	Val-Glu-Leu	Amino acids and derivatives	Amino acids and derivatives	-	3	42537.1	61235	91493.1	96264.7	74732.8	61649.4	-
MWS201451	255.15	156.08	254.138	C11H18N4O3	[M+H]+	Val-His	Amino acids and derivatives	Amino acids and derivatives	13589-07-6	2	77076.5	82382	76739.8	81710	103187	79656.7	-
Lcsp001751	346.2	185.16	345.19	C15H27N3O6	[M+H]+	Val-Ile-Asp	Amino acids and derivatives	Amino acids and derivatives	-	3	607236	674087	647503	803337	627453	651773	-
MW0159039	288.19	86.1	287.185	C13H25N3O4	[M+H]+	Val-Ile-Gly	Amino acids and derivatives	Amino acids and derivatives	-	3	1.53858e+06	1.98871e+06	1.65763e+06	1.85553e+06	1.59379e+06	1.85851e+06	-
Lcsp002568	330.24	185.16	329.231	C16H31N3O4	[M+H]+	Val-Ile-Val	Amino acids and derivatives	Amino acids and derivatives	-	3	864238	1.05221e+06	844926	934335	939124	953403	-
MW0110454	281.15	121.03	280.142	C14H20N2O4	[M+H]+	Val-Tyr	Amino acids and derivatives	Amino acids and derivatives	3061-91-4	3	5.00928e+07	6.29977e+07	6.09257e+07	5.96107e+07	6.07727e+07	5.87642e+07	-
Lcsp001100	332.18	171.15	331.174	C14H25N3O6	[M+H]+	Val-Val-Asp	Amino acids and derivatives	Amino acids and derivatives	-	1	486138	294758	488010	209443	639427	483336	-
Lcsp003681	330.24	199.14	329.231	C16H31N3O4	[M+H]+	Val-Val-Leu	Amino acids and derivatives	Amino acids and derivatives	-	3	95542.3	123747	135069	125357	124608	123224	-
Smgp006126	351.17	144.08	350.163	C21H22N2O3	[M+H]+	Vallesiachotamine	Alkaloids	Plumerane	5523-37-5	3	114442	117159	130681	118787	79033.2	110475	-
mws0028	167.03	108.02	168.042	C8H8O4	[M-H]-	Vanillic acid	Phenolic acids	Phenolic acids	121-34-6	3	172203	201155	142967	183490	146205	181376	C06672
Wasyqn2170	329.09	167.03	330.095	C14H18O9	[M-H]-	Vanillic acid glucoside	Phenolic acids	Phenolic acids	32142-31-7	3	7.84918e+06	8.6881e+06	8.27911e+06	8.88664e+06	9.0165e+06	8.41026e+06	-
MWSmce455	181.05	107.01	182.058	C9H10O4	[M-H]-	Vanillic acid methyl ester	Phenolic acids	Phenolic acids	3943-74-6	3	57286.5	69690.3	59808.7	76950.7	68949.8	63286.1	-
mws0458	151.04	136.02	152.047	C8H8O3	[M-H]-	Vanillin; 4-Hydroxy-3-Methoxybenzaldehyde	Others	Aldehyde compounds	121-33-5	3	271363	403132	183924	381109	376706	409747	C00755
Zmtn001661	315.11	153.02	316.116	C14H20O8	[M-H]-	Vanilloloside	Others	Alcohol compounds	74950-96-2	3	1.99337e+06	1.76029e+06	2.25809e+06	2.05914e+06	1.99413e+06	1.85706e+06	-
Walbn02566	475.18	179.07	476.189	C21H32O12	[M-H]-	Vanillyl glycol 3-O-(4''-O-arabinosyl)rhamnoside	Others	Alcohol compounds	-	3	34870.9	28209.4	24212.9	30802.2	35069.6	36378.6	-
Hmgn001278	461.17	315.1	462.174	C20H30O12	[M-H]-	Verbasoside	Others	Alcohol compounds	61548-34-3	3	7938.88	10983.8		10385.1	11134.5	10113.3	-
HX1272	345.17	137.06	344.162	C20H24O5	[M+H]+	Verrucosin	Lignans and Coumarins	Lignans	-	3	167991	208697	171374	180634	204704	211931	-
Zmjp000966	268.11	136.06	267.097	C10H13N5O4	[M+H]+	Vidarabine	Nucleotides and derivatives	Nucleotides and derivatives	5536-17-4	1	4.72589e+06	5.41764e+06	5.16213e+06	5.51763e+06	5.91409e+06	5.11342e+06	-
Cmpk003885	497.274	317.211	496.267	C26H40O9	[M+H]+	Villanovane I	Terpenoids	Ditepenoids	1583263-49-3	3	242222	179751	223709	226569	191167	207056	-
Qmgp102413	367.202	144.081	366.194	C22H26N2O3	[M+H]+	Villocarine A	Alkaloids	Plumerane	-	3	376865	430764	377512	436814	431257	441735	-
pmp000445	499.207	337.16	498.2	C26H30N2O8	[M+H]+	Vincoside lactam	Alkaloids	Plumerane	-	3	216201	266732	349017	327762	282995	247769	-
Qmdp112410	337.27	263.24	336.266	C21H36O3	[M+H]+	Vitetrifolin H	Terpenoids	Ditepenoids	-	3	1.07811e+06	1.16295e+06	1.04539e+06	1.07721e+06	1.00882e+06	1.10684e+06	-
Wbmp004309	325.09	163.04	324.1	C19H16O5	[M+H]+	Vitexdoin C	Lignans and Coumarins	Lignans	-	3	952829	877608	969545	430477	876268	921043	-
pmb0680	741.202	147.3	740.195	C36H36O17	[M+H]+	Vitexin-7-O-(6''-p-coumaroyl)glucoside	Flavonoids	Flavones	-	3	31798.4	38375.2	30329.8	40360.7	60751.8	31847.1	-
pmb2981	739.21	563.14	740.216	C33H40O19	[M-H]-	Vitexin-7-O-rutinoside	Flavonoids	Flavones	-	3	56873.9	84020.7	74774.2	56933.4	69555.3	80660.8	-
Lmhn002051	283.05	167.04	284.053	C12H12O8	[M-H]-	Vnilloylmalic acid	Phenolic acids	Phenolic acids	-	3	33010.6	29964.3	23416.2	32025.7	49969.1	35520	-
Lmhn001386	299.04	167.03	300.048	C12H12O9	[M-H]-	Vnilloyltartaric acid	Phenolic acids	Phenolic acids	-	3	57642.6	51133.7	34738.3	50660.9	58545.1	58617.6	-
Hmmp003004	389.144	149.06	388.137	C17H24O10	[M+H]+	Vogeloside	Terpenoids	Monoterpenoids	60077-47-6	3	154921	168606	184515	181045	175126	196217	-
Waptn03507	445.21	153.09	386.194	C19H30O8	[M+CH3COO]-	Vomifoliol-D-glucopyranoside	Terpenoids	Monoterpenoids	-	3	137336	195320	150708	73423.2	170975	98445.9	-
pme0256	151.03	108.02	152.033	C5H4N4O2	[M-H]-	Xanthine	Nucleotides and derivatives	Nucleotides and derivatives	69-89-6	1	2.05819e+06	2.80374e+06	2.52687e+06	2.35497e+06	1.69989e+06	2.66325e+06	C00385
MWSslk009	197.06	141.07	196.052	C13H8O2	[M+H]+	Xanthone	Flavonoids	Other Flavonoids	90-47-1	3	47023.7	33622.3	32426.2	60689.5	60394.2	40077.1	-
mws0668	283.07	151.03	284.076	C10H12N4O6	[M-H]-	Xanthosine	Nucleotides and derivatives	Nucleotides and derivatives	146-80-5	2	4.432e+06	4.93986e+06	4.25883e+06	4.75669e+06	4.82235e+06	4.86901e+06	C01762
Wasn002329	366.08	160.04	367.09	C16H17NO9	[M-H]-	Xanthurenic Acid 8-O-Glucoside	Alkaloids	Quinoline alkaloids	97451-32-6	1	1.54623e+06	1.75789e+06	1.65066e+06	1.55174e+06	1.58219e+06	1.62507e+06	-
pme0513	151.06	59.01	152.069	C5H12O5	[M-H]-	Xylitol*	Others	Saccharides	87-99-0	3	37938.1	34059.2	32695.2	21303.4	27215.4	42368.7	C00379
MWStz139	355.202	144.086	354.194	C21H26N2O3	[M+H]+	Yohimbine*	Alkaloids	Plumerane	146-48-5	3	45472.8	44099.5	54857.6	30101.2	48985.1	33421.5	C09256
MWS20184	277.18	137.07	276.173	C17H24O3	[M+H]+	[6]-Shogaol	Phenolic acids	Phenolic acids	555-66-8	3	1.7474e+06	1.72868e+06	1.756e+06	1.86169e+06	1.81983e+06	1.82742e+06	C10494
Wcdp000970	121.06	103.05	120.058	C8H8O	[M+H]+	acetophenone	Others	Others	98-86-2	1	121099	109836	163826	91671.6	133222	83046.1	C07113
Hahp000801	118.08	72.08	117.079	C5H11NO2	[M+H]+	alanine betaine	Alkaloids	Alkaloids	-	1	8.76388e+06	9.52227e+06	9.52239e+06	8.3549e+06	9.73589e+06	9.68476e+06	-
MWSmce482	209.12	179.07	208.11	C12H16O3	[M+H]+	alpha-Asarone	Phenolic acids	Phenolic acids	2883-98-9	3	178617	188667	177731	190500	202812	173467	-
Wafn011571	295.23	195.14	296.235	C18H32O3	[M-H]-	alpha-Hydroxylinoleic acid*	Lipids	Free fatty acids	57818-44-7	1	1.72171e+06	1.7664e+06	1.78225e+06	1.72181e+06	1.75244e+06	1.72417e+06	-
MWS1743	217.16	129.07	216.151	C15H20O	[M+H]+	alpha-hexylcinnamaldehyde	Phenolic acids	Phenolic acids	101-86-0	3	132548	126800	114713	116773	114502	128463	-
Saxp003465	551.18	195.07	550.169	C26H30O13	[M+H]+	angustiamarin	Terpenoids	Monoterpenoids	-	3	270006	339698	309682	330544	153637	221771	-
Ylyn012389	485.32	485.32	486.334	C30H46O5	[M-H]-	celastolide	Terpenoids	Triterpene	-	3	1.01654e+07	8.01684e+06	8.86537e+06	1.00041e+07	8.76387e+06	9.2558e+06	-
pmf0470	132.065	86.0601	131.058	C5H9NO3	[M+H]+	cis-4-Hydroxy-D-proline*	Amino acids and derivatives	Amino acids and derivatives	2584-71-6	3	111043	111024	115014	74074.1	85632.9	106404	C03440
MWS1962	153.13	83.05	152.12	C10H16O	[M+H]+	cis-Citral	Terpenoids	Monoterpenoids	5392-40-5	3	87448.8	93894.3	99981.9	126985	110824	133128	C09847
MWStz202	353.15	177.06	352.142	C20H20N2O4	[M+H]+	cis-Moschamine*	Alkaloids	Phenolamine	193224-24-7	3	644954	756415	741336	715640	706559	739051	-
Zazp002547	205.1	146.06	204.09	C11H12N2O2	[M+H]+	cyclo-(Gly-Phe)	Amino acids and derivatives	Amino acids and derivatives	10125-07-2	1	2.48343e+06	2.72268e+06	2.53129e+06	2.59583e+06	2.55085e+06	2.49247e+06	-
ZbWp000749	203.15	70.07	202.143	C8H18N4O2	[M+H]+	ethyl-L-arginine	Amino acids and derivatives	Amino acids and derivatives	-	2	4.38934e+06	4.84693e+06	4.4865e+06	4.1213e+06	4.5889e+06	4.39773e+06	-
Wmyn000214	467.082	423.09	468.09	C20H20O13	[M-H]-	gentisic acid 5-O-β-D-(6'-O-galloyl)-gluco-pyranoside	Phenolic acids	Phenolic acids	-	3	112892	93458.9	83485.1	82217.6	76755.8	102624	-
Zamn006847	227.13	183.14	228.136	C12H20O4	[M-H]-	glycoric acid	Others	Others	-	3	49309.4	55294.3	55351.3	57694.9	42953.1	53137.5	-
HX1372	377.16	163.08	376.152	C20H24O7	[M+H]+	guaiacylglycerol-β-coniferyl ether	Lignans and Coumarins	Lignans	-	3	191174	277787	376131	278169	260857	232627	-
MWS20178	223.06	190.03	222.053	C11H10O5	[M+H]+	isofraxidin	Lignans and Coumarins	Coumarins	486-21-5	1	99734.7	103052	108384	124298	103858	105478	C17480
Lcsp000212	263.08	235.09	262.074	C16H10N2O2	[M+H]+	isoindygo*	Alkaloids	Plumerane	-	1	190006	209023	202504	200598	182204	206423	-
Smsp110188	235.17	147.08	234.162	C15H22O2	[M+H]+	isopolygodial	Terpenoids	Sesquiterpenoids	-	3	57924.6	57434.2	64512.1	46597.3	61056.8	54701	-
Lcsp013328	324.29	62.06	323.282	C20H37NO2	[M+H]+	linoleoyl ethanolamine	Lipids	LPE	68171-52-8	2	1.17561e+07	1.13727e+07	1.13695e+07	1.17922e+07	1.15627e+07	1.16111e+07	-
Zasp102439	118.06	91.05	117.058	C8H7N	[M+H]+	m-Aminophenylacetylene	Alkaloids	Alkaloids	54060-30-9	1	1.12107e+07	1.19085e+07	1.15468e+07	1.06738e+07	1.06559e+07	1.13143e+07	-
Lcfp022562	295.13	120.08	294.122	C14H18N2O5	[M+H]+	methylalpha-aspartylphenylalaninate*	Amino acids and derivatives	Amino acids and derivatives	25548-16-7	2	546008	373796	430995	389773	399496	392521	-
Smcp001137	188.07	118.06	187.063	C11H9NO2	[M+H]+	naphthisoxazol A*	Alkaloids	Alkaloids	-	1	1.01173e+06	1.0246e+06	1.11015e+06	1.09835e+06	1.02744e+06	1.15662e+06	-
Wbjp001169	221.09	130.06	220.085	C11H12N2O3	[M+H]+	o-Carboxy-5-hydroxytryptamine	Alkaloids	Alkaloids	-	1	1.62254e+06	1.8138e+06	1.43871e+06	1.90721e+06	1.65734e+06	1.78457e+06	-
pme1439	165.05	119.05	164.047	C9H8O3	[M+H]+	p-Coumaric acid	Phenolic acids	Phenolic acids	501-98-4	1	102962	135736	166196	93386.6	161427	160390	C00811
MWSslk144	193.09	147.04	192.079	C11H12O3	[M+H]+	p-Coumaric acid ethyl ester	Phenolic acids	Phenolic acids	7362-39-2	3	120474	109429	153932	120896	136401	133550	-
mws1195	179.07	147.04	178.063	C10H10O3	[M+H]+	p-Coumaric acid methyl ester	Phenolic acids	Phenolic acids	19367-38-5	3	964090	1.0926e+06	932467	1.23604e+06	1.13446e+06	868881	-
Zmhn002301	325.093	163.039	326.1	C15H18O8	[M-H]-	p-Coumaric acid-4-O-glucoside*	Phenolic acids	Phenolic acids	117405-48-8	1	2.16453e+06	2.73772e+06	2.4824e+06	2.34636e+06	2.58319e+06	2.45691e+06	C06739
Waqkp01819	293.16	147.04	292.154	C14H20N4O3	[M+H]+	p-Coumaroyl-hydroxyagmatine	Alkaloids	Phenolamine	-	3	2.97642e+06	3.01068e+06	3.17257e+06	3.31114e+06	3.42936e+06	3.23603e+06	-
Lmhp005784	425.21	177.05	424.2	C24H28N2O5	[M+H]+	p-Coumaroylferuloylcadaverine	Alkaloids	Phenolamine	-	3	250192	322665	296668	293165	289798	232410	-
Lmhn002926	279.05	163.04	280.058	C13H12O7	[M-H]-	p-Coumaroylmalic acid	Phenolic acids	Phenolic acids	-	3	92735.5	77941.7	70608.4	48490.8	80707.4	65758.4	-
pmb0490	235.14	147.04	234.137	C13H18N2O2	[M+H]+	p-Coumaroylputrescine	Alkaloids	Phenolamine	34136-53-3	1	1.76867e+06	2.20294e+06	2.08469e+06	2.31635e+06	2.23658e+06	2.24004e+06	C18326
Ymjm000152	271.08	108.02	272.09	C12H16O7	[M-H]-	p-Hydroxypheny-β-D-allopyranoside	Others	Others	-	1	1.32252e+06	1.52999e+06	1.30351e+06	1.28095e+06	1.36672e+06	1.34088e+06	-
Sayp008460	233.15	131.09	232.146	C15H20O2	[M+H]+	phomophyllin A	Terpenoids	Sesquiterpenoids	-	3	110950	156086	103995	157523	169948	150310	-
Sayp010368	315.19	187.11	314.188	C20H26O3	[M+H]+	phyllanflexoid A*	Terpenoids	Ditepenoids	-	3	1.94292e+06	1.90681e+06	1.93895e+06	2.00682e+06	1.96545e+06	2.0049e+06	-
Zamn00402	179.056	59.0139	180.063	C6H12O6	[M-H]-	sorbose*	Others	Saccharides	3615-56-3	1	248066	184506	250959	204193	252374	227783	C01452
Hahn002315	579.21	417.159	580.216	C28H36O13	[M-H]-	syringaresinol-4-O-β-D-glucopyranoside	Lignans and Coumarins	Lignans	-	3	121201	152197	182254	157095	171541	142357	-
zjbp111026	343.15	163.07	342.147	C20H22O5	[M+H]+	tetrahydrochromone M	Others	Chromone	-	3	145226	161517	143417	164543	141282	150701	-
Walbn03514	523.22	361.16	524.226	C26H36O11	[M-H]-	tetrahydrodehydrodiconiferyl alcohol glucoside	Lignans and Coumarins	Lignans	-	1	742854	793249	588315	794163	710986	857558	-
Lcmp122908	303.23	257.23	302.225	C20H30O2	[M+H]+	trans-communic acid*	Terpenoids	Ditepenoids	-	3	257309	236999	207906	215986	208143	241914	-
Ylyn008976	317.21	317.21	318.219	C20H30O3	[M-H]-	tripterifordin	Terpenoids	Ditepenoids	139122-81-9	3	225766	260910	195996	232571	249487	258618	-
Wbmp002283	146.06	118.06	145.053	C9H7NO	[M+H]+	Α-hydroxyquinoline	Alkaloids	Alkaloids	-	2	2.15972e+07	22372285	2.15534e+07	2.2209e+07	1.96411e+07	2.11992e+07	-
Lmbn002648	163.04	119.05	164.047	C9H8O3	[M-H]-	α-Hydroxycinnamic Acid*	Phenolic acids	Phenolic acids	5801-57-0	3	767428	742220	994082	711886	675865	703261	C02763
mws0367	277.22	277.22	278.225	C18H30O2	[M-H]-	α-Linolenic Acid	Lipids	Free fatty acids	463-40-1	2	1.48335e+08	1.39756e+08	1.43422e+08	1.3918e+08	1.31264e+08	1.43559e+08	C06427
MWSprf145	175.12	143.07	174.116	C11H14N2	[M+H]+	α-Methyltryptamine	Alkaloids	Alkaloids	7795-52-0	3	116288	111435	107365	103746	113958	131072	-
MWStz201	241.1	223.09	240.09	C14H12N2O2	[M+H]+	β-Carboline-1-propanoic acid	Alkaloids	Plumerane	89915-39-9	3	142163	238708	225874	210177	175192	179263	-
Zbln001290	331.1	151.04	332.111	C14H20O9	[M-H]-	β-Hydroxy-(3,4-dihydroxyphenylethanolyl)-glucoside	Others	Alcohol compounds	-	1	43770.3	57537.9	42714.4	55750.3	54861.6	52349.1	-
Hmln002996	639.19	621.18	640.2	C29H36O16	[M-H]-	β-Hydroxyacteoside	Phenolic acids	Phenolic acids	95587-86-3	3	51981.3	30120.5	46760.3	52667.5	29496.6	36063.7	C17528
mws0147	117.06	59.01	118.063	C5H10O3	[M-H]-	β-Hydroxyisovaleric acid	Organic acids	Organic acids	625-08-1	1	484679	542814	580618	507500	518067	499267	C20827
Zmdp001663	279.101	133.032	278.094	C10H18N2O5S	[M+H]+	γ-Glu-Met	Amino acids and derivatives	Amino acids and derivatives	17663-87-5	3	273915	314996	222899	274483	307519	291647	-
Zmmp003443	334.14	188.07	333.132	C16H19N3O5	[M+H]+	γ-Glu-Trp	Amino acids and derivatives	Amino acids and derivatives	66471-20-3	1	7.86239e+06	8.7204e+06	8.04092e+06	8.75746e+06	8.01256e+06	7.86062e+06	-
Wahlp02334	267.13	121.06	266.127	C13H18N2O4	[M+H]+	γ-Glutamyl tyramine	Alkaloids	Phenolamine	65520-56-1	1	570890	771289	794910	816942	770357	690449	-
Zmdp001647	247.13	184.1	246.122	C10H18N2O5	[M+H]+	γ-Glutamyl-L-valine	Amino acids and derivatives	Amino acids and derivatives	-	3	606689	609927	470094	500520	731664	482184	-
Zmdn001564	293.11	164.07	294.122	C14H18N2O5	[M-H]-	γ-Glutamylphenylalanine	Amino acids and derivatives	Amino acids and derivatives	7432-24-8	3	152649	124306	136208	111230	99171	127408	-
Zmdp001857	311.12	165.05	310.116	C14H18N2O6	[M+H]+	γ-Glutamyltyrosine	Amino acids and derivatives	Amino acids and derivatives	7432-23-7	3	1.25993e+06	1.53491e+06	1.52086e+06	1.01152e+06	1.60648e+06	1.49238e+06	-
MWSmce692	277.22	59.01	278.225	C18H30O2	[M-H]-	γ-Linolenic Acid*	Lipids	Free fatty acids	506-26-3	1	126035	122316	123784	122353	111513	121263	C06426
pmf0250	409.31	391.3	410.318	C28H42O2	[M-H]-	γ-Tocotrienol	Others	Vitamin	14101-61-2	3	43291.1	44057.4	36791.5	44007.4	45667.1	41757.2	C14155
Zmdp000917	160.11	114.04	159.101	C6H13N3O2	[M+H]+	δ-Guanidinovaleric acid	Organic acids	Organic acids	462-93-1	3	18562.1	22723.1	24360.3	17933.1	24427.7	25768.6	-
