# Supplementary material for: Polymer-lipid hybrid nanoparticles incorporating green coffee extract: enhancing treatment for hepatic steatosis and fibrosis through metabolomic insights
Source: Royal Society of Chemistry journal article supplement (doi:10.1039/d5ra06552f), 2025-01-01
Supplement: d5ra06552f3.xlsx [file d5ra06552f3.xlsx]

## Sheet: S2
Table S2. List of processed identified metabolites in samples
*Chemical Classification using Classyfire http://classyfire.wishartlab.com
Name	SMILES	InChIKey	Superclass	Class*	Subclass*
1-Heptylamine	C(CCCCCC)N	WJYIASZWHGOTOU-UHFFFAOYSA-N	Organic nitrogen compounds	Organonitrogen compounds	Amines
10-Formyltetrahydrofolic%20Acid	C(=O)N(C1=CC=C(C(N[C@@H](CCC(=O)O)C(=O)O)=O)C=C1)CC1CNC=2N=C(N)NC(=O)C2N1	AUFGTPPARQZWDO-YUZLPWPTSA-N	Organoheterocyclic compounds	Pteridines and derivatives	Pterins and derivatives
2,3,5-Trimethylpyrazine	CC1=NC=C(N=C1C)C	IAEGWXHKWJGQAZ-UHFFFAOYSA-N	Organoheterocyclic compounds	Diazines	Pyrazines
2-(Acetylamino)-3-phenyl-2-propenoic%20acid	C(C)(=O)NC(C(=O)O)=CC1=CC=CC=C1	XODAOBAZOQSFDS-UHFFFAOYSA-N	Organic acids and derivatives	Carboxylic acids and derivatives	Amino acids, peptides, and analogues
2-Aminophenol	NC1=C(C=CC=C1)O	CDAWCLOXVUBKRW-UHFFFAOYSA-N	Benzenoids	Benzene and substituted derivatives	Aniline and substituted anilines
2-Benzoxazolinone	O1C(NC2=C1C=CC=C2)=O	ASSKVPFEZFQQNQ-UHFFFAOYSA-N	Organoheterocyclic compounds	Benzoxazoles	Benzoxazolones
2-Methyl-5-nitroimidazole-1-ethanol	CC=1N(C(=CN1)[N+](=O)[O-])CCO	VAOCPAMSLUNLGC-UHFFFAOYSA-N	Organoheterocyclic compounds	Azoles	Imidazoles
3,4-Dimethoxybenzamide	COC=1C=C(C(=O)N)C=CC1OC	XNDZRGTVUVVHQT-UHFFFAOYSA-N	Benzenoids	Benzene and substituted derivatives	Methoxybenzenes
3-Hydroxyanthranilic%20acid	OC1=C(C(C(=O)O)=CC=C1)N	WJXSWCUQABXPFS-UHFFFAOYSA-N	Benzenoids	Benzene and substituted derivatives	Benzoic acids and derivatives
3-amino-2-naphthoic%20acid	NC=1C(=CC2=CC=CC=C2C1)C(=O)O	XFXOLBNQYFRSLQ-UHFFFAOYSA-N	Benzenoids	Naphthalenes	Naphthalenecarboxylic acids and derivatives
4,5,6-Trihydroxy-2-cyclohexen-1-ylideneacetonitrile	OC1C=CC(C(C1O)O)=CC#N	SIKDHUUZRZDYPO-UHFFFAOYSA-N	Organic oxygen compounds	Organooxygen compounds	Alcohols and polyols
4-(2-aminoethenyl)phenol	NC=CC1=CC=C(C=C1)O	UBLXQNDOZQESPG-UHFFFAOYSA-N	Benzenoids	Benzene and substituted derivatives	Styrenes
5,6-Dimethylbenzimidazole	CC1=CC2=C(N=CN2)C=C1C	LJUQGASMPRMWIW-UHFFFAOYSA-N	Organoheterocyclic compounds	Benzimidazoles	Unassigned
5-Nitrobenzimidazole	[N+](=O)([O-])C1=CC2=C(N=CN2)C=C1	XPAZGLFMMUODDK-UHFFFAOYSA-N	Organoheterocyclic compounds	Benzimidazoles	Unassigned
Aniline	NC1=CC=CC=C1	PAYRUJLWNCNPSJ-UHFFFAOYSA-N	Benzenoids	Benzene and substituted derivatives	Aniline and substituted anilines
Benzamide	C(C1=CC=CC=C1)(=O)N	KXDAEFPNCMNJSK-UHFFFAOYSA-N	Benzenoids	Benzene and substituted derivatives	Benzoic acids and derivatives
Caffeine	N1(C)C(=O)N(C)C=2N=CN(C)C2C1=O	RYYVLZVUVIJVGH-UHFFFAOYSA-N	Organoheterocyclic compounds	Imidazopyrimidines	Purines and purine derivatives
CaffeoylTyrosine	C(\C=C\C1=CC(O)=C(O)C=C1)(=O)N[C@@H](CC1=CC=C(C=C1)O)C(=O)O	JRXLVUMFJASLDR-PXYYCUNGSA-N	Organic acids and derivatives	Carboxylic acids and derivatives	Amino acids, peptides, and analogues
N-(beta-D-Glucosyl)nicotinate	[C@@H]1([C@H](O)[C@@H](O)[C@H](O)[C@H](O1)CO)N1CC(C(=O)[O-])=CC=C1	DDEDOKBHVJFYCO-KAMPLNKDSA-M	Lipids and lipid-like molecules	Fatty Acyls	Fatty acids and conjugates
Choline	OCC[N+](C)(C)C	OEYIOHPDSNJKLS-UHFFFAOYSA-N	Organic nitrogen compounds	Organonitrogen compounds	Quaternary ammonium salts
Cinnamamide	C(C=CC1=CC=CC=C1)(=O)N	APEJMQOBVMLION-UHFFFAOYSA-N	Phenylpropanoids and polyketides	Cinnamic acids and derivatives	Cinnamic acid amides
Caffeoylmethylgluconamide	C(\C=C\C1=CC(O)=C(O)C=C1)(=O)[C@]([C@](C(=O)N)(O)C)(O)[C@H](O)[C@H](O)CO	FUOORVOTLIPTCV-CUUZNRPSSA-N	Phenylpropanoids and polyketides	Cinnamic acids and derivatives	Hydroxycinnamic acids and derivatives
Dopamine	NCCC1=CC(O)=C(O)C=C1	VYFYYTLLBUKUHU-UHFFFAOYSA-N	Benzenoids	Phenols	Benzenediols
Histamine	NCCC1=CNC=N1	NTYJJOPFIAHURM-UHFFFAOYSA-N	Organic nitrogen compounds	Organonitrogen compounds	Amines
Histidinol	N[C@@H](CC1=CNC=N1)CO	ZQISRDCJNBUVMM-YFKPBYRVSA-N	Organic nitrogen compounds	Organonitrogen compounds	Amines
Imidazol-1-yl-acetic%20acid	N1(C=NC=C1)CC(=O)O	QAFBDRSXXHEXGB-UHFFFAOYSA-N	Organic acids and derivatives	Carboxylic acids and derivatives	Amino acids, peptides, and analogues
Imidazole-4-Acetic%20Acid	N1C=NC(=C1)CC(=O)O	PRJKNHOMHKJCEJ-UHFFFAOYSA-N	Organoheterocyclic compounds	Azoles	Imidazoles
1-O-Caffeoyllysine	C(\C=C\C1=CC(O)=C(O)C=C1)(=O)OC([C@@H](N)CCCCN)=O	LEHMQMCEDUFWNN-ZRQQLDRUSA-N	Phenylpropanoids and polyketides	Cinnamic acids and derivatives	Hydroxycinnamic acids and derivatives
N-(2-Hydroxy-4-methoxyphenyl)acetamide	OC1=C(C=CC(=C1)OC)NC(C)=O	PHOAIOPTKPVQOB-UHFFFAOYSA-N	Benzenoids	Phenols	Methoxyphenols
Sinapoylglucuronic%20acid	C(\C=C\C1=CC(OC)=C(O)C(OC)=C1)(=O)C(=O)[C@H](O)[C@@H](O)[C@H](O)[C@H](O)C(=O)O	XAXBYGKOCXNOON-OLWLZZTLSA-N	Organic oxygen compounds	Organooxygen compounds	Carbohydrates and carbohydrate conjugates
N-(4-oxopentyl)-acetamide	O=C(CCCNC(C)=O)C	HJSYCVYFTIIOPM-UHFFFAOYSA-N	Organic acids and derivatives	Carboxylic acids and derivatives	Carboxylic acid derivatives
N-Acetylcadaverine	C(C)(=O)NCCCCCN	RMOIHHAKNOFHOE-UHFFFAOYSA-N	Organic acids and derivatives	Carboxylic acids and derivatives	Carboxylic acid derivatives
N-Isobutyl%20Decanamide	C(CCCCCCCCC)(=O)NCC(C)C	JIOJLCAPGHFHDI-UHFFFAOYSA-N	Lipids and lipid-like molecules	Fatty Acyls	Fatty amides
N-Oleoylethanolamine	C(CCCCCCC\C=C/CCCCCCCC)(=O)NCCO	BOWVQLFMWHZBEF-KTKRTIGZSA-N	Organic nitrogen compounds	Organonitrogen compounds	Amines
N-benzoyl-2-aminoethyl-?-D-glucopyranoside
N-benzylformamide	C(C1=CC=CC=C1)NC=O	IIBOGKHTXBPGEI-UHFFFAOYSA-N	Benzenoids	Benzene and substituted derivatives	Unassigned
O-Phosphocholine	P(=O)([O-])(O)OCC[N+](C)(C)C	YHHSONZFOIEMCP-UHFFFAOYSA-N	Organic nitrogen compounds	Organonitrogen compounds	Quaternary ammonium salts
Octadec-8-enamide	C(CCCCCCC=CCCCCCCCCC)(=O)N	RVDPDXRDNDUJHE-UHFFFAOYSA-N	Lipids and lipid-like molecules	Fatty Acyls	Fatty amides
Octadecadienamide	C(C=CC=CCCCCCCCCCCCCC)(=O)N	QFIHQWXKTUONPL-UHFFFAOYSA-N	Organic acids and derivatives	Carboximidic acids and derivatives	Carboximidic acids
Putrescine	NCCCCN	KIDHWZJUCRJVML-UHFFFAOYSA-N	Organic nitrogen compounds	Organonitrogen compounds	Amines
Spermine	NCCCNCCCCNCCCN	PFNFFQXMRSDOHW-UHFFFAOYSA-N	Organic nitrogen compounds	Organonitrogen compounds	Amines
Stearamide	C(CCCCCCCCCCCCCCCCC)(=O)N	LYRFLYHAGKPMFH-UHFFFAOYSA-N	Organic acids and derivatives	Carboximidic acids and derivatives	Carboximidic acids
Styrylamine	C(=CC1=CC=CC=C1)N	UWRZIZXBOLBCON-UHFFFAOYSA-N	Benzenoids	Benzene and substituted derivatives	Styrenes
Theobromine	N1C(=O)N(C)C=2N=CN(C)C2C1=O	YAPQBXQYLJRXSA-UHFFFAOYSA-N	Organoheterocyclic compounds	Imidazopyrimidines	Purines and purine derivatives
Theophylline	N1(C)C(=O)N(C)C=2N=CNC2C1=O	ZFXYFBGIUFBOJW-UHFFFAOYSA-N	Organoheterocyclic compounds	Imidazopyrimidines	Purines and purine derivatives
m-Aminophenylacetylene	NC=1C=C(C=CC1)C#C	NNKQLUVBPJEUOR-UHFFFAOYSA-N	Benzenoids	Benzene and substituted derivatives	Aniline and substituted anilines
Isoquinoline	C1=NC=CC2=CC=CC=C12	AWJUIBRHMBBTKR-UHFFFAOYSA-N	Organoheterocyclic compounds	Isoquinolines and derivatives	Unassigned
Sinapoylsinapoyltartaric%20acid	C(\C=C\C1=CC(OC)=C(O)C(OC)=C1)(=O)C(C(C(=O)O)(O)C(\C=C\C1=CC(OC)=C(O)C(OC)=C1)=O)(O)C(=O)O	PIZSBWWUVWSYEI-KQQUZDAGSA-N	Phenylpropanoids and polyketides	Cinnamic acids and derivatives	Hydroxycinnamic acids and derivatives
Diferuloyl%20caffeic%20acid	C(\C=C\C1=CC(OC)=C(O)C=C1)(=O)\C(=C(/C(=O)O)\C(\C=C\C1=CC(OC)=C(O)C=C1)=O)\C1=CC(O)=C(O)C=C1	KSRZLNWUTKHXAX-FCSZRLTMSA-N	Phenylpropanoids and polyketides	Cinnamic acids and derivatives	Hydroxycinnamic acids and derivatives
Diferuloylcadaverine	C(\C=C\C1=CC(OC)=C(O)C=C1)(=O)N(CCCCCN)C(\C=C\C1=CC(OC)=C(O)C=C1)=O	HSBZMHFYANOOBV-QHKWOANTSA-N	Phenylpropanoids and polyketides	Cinnamic acids and derivatives	Hydroxycinnamic acids and derivatives
Caffeoylagmatine	C(\C=C\C1=CC(O)=C(O)C=C1)(=O)NCCCCNC(N)=N	UUSBJNDAAOUQAC-GQCTYLIASA-N	Benzenoids	Phenols	Benzenediols
Caffeoylcholine	C(\C=C\C1=CC(O)=C(O)C=C1)(=O)OCC[N+](C)(C)C	HLGBXKIGYXVIFU-UHFFFAOYSA-O	Phenylpropanoids and polyketides	Cinnamic acids and derivatives	Hydroxycinnamic acids and derivatives
N-Feruloylhydroxyagmatine	C(\C=C\C1=CC(OC)=C(O)C=C1)(=O)NC(NCCCCNO)=N	PELLZRJVFWSXPG-FNORWQNLSA-N	Phenylpropanoids and polyketides	Cinnamic acids and derivatives	Hydroxycinnamic acids and derivatives
Feruloylcholine	C(\C=C\C1=CC(OC)=C(O)C=C1)(=O)OCC[N+](C)(C)C	XHSNXOZZHHJDDX-UHFFFAOYSA-O	Phenylpropanoids and polyketides	Cinnamic acids and derivatives	Hydroxycinnamic acids and derivatives
N-Feruloyl-Cadaverine	C(\C=C\C1=CC(OC)=C(O)C=C1)(=O)NCCCCCN	WNIFWVAIYDYDNJ-SOFGYWHQSA-N	Phenylpropanoids and polyketides	Cinnamic acids and derivatives	Hydroxycinnamic acids and derivatives
N-(E)-Caffeoyl-L-leucine	C(\C=C\C1=CC(O)=C(O)C=C1)(=O)N[C@@H](CC(C)C)C(=O)O	OLBHHFOSTWXOHD-MALLOTDXSA-N	Organic acids and derivatives	Carboxylic acids and derivatives	Amino acids, peptides, and analogues
N-(Isoferuloyl)-Glutamic%20Acid	C(\C=C\C1=CC(O)=C(OC)C=C1)(=O)N[C@@H](CCC(=O)O)C(=O)O	CMUANLUVCDUDGB-YVGDHZEHSA-N	Organic acids and derivatives	Carboxylic acids and derivatives	Amino acids, peptides, and analogues
N-Caffeoylputrescine	C(\C=C\C1=CC(O)=C(O)C=C1)(=O)NCCCCN	KTZNZCYTXQYEHT-GQCTYLIASA-N	Phenylpropanoids and polyketides	Cinnamic acids and derivatives	Hydroxycinnamic acids and derivatives
3-O-Feruloyl%20Methylglucaric%20Acid	C(\C=C\C1=CC(OC)=C(O)C=C1)(=O)O[C@H]([C@](C(=O)O)(O)C)[C@H](O)[C@H](O)C(=O)O	OPCGORXFDYXRIS-CMOWKJHOSA-N	Organic oxygen compounds	Organooxygen compounds	Carbohydrates and carbohydrate conjugates
N-Feruloylagmatine	C(\C=C\C1=CC(OC)=C(O)C=C1)(=O)NC(NCCCCN)=N	CVJVKWSECGMGCW-FNORWQNLSA-N	Benzenoids	Phenols	Methoxyphenols
1-O-Feruloyllysine	C(\C=C\C1=CC(OC)=C(O)C=C1)(=O)OC([C@@H](N)CCCCN)=O	IIBWXXZUVYDIRL-WMADIVHISA-N	Phenylpropanoids and polyketides	Cinnamic acids and derivatives	Hydroxycinnamic acids and derivatives
N-Feruloylputrescine	C(\C=C\C1=CC(OC)=C(O)C=C1)(=O)NCCCCN	SFUVCMKSYKHYLD-FNORWQNLSA-N	Phenylpropanoids and polyketides	Cinnamic acids and derivatives	Hydroxycinnamic acids and derivatives
N-Feruloyltryptamine	C(\C=C\C1=CC(OC)=C(O)C=C1)(=O)NCCC1=CNC2=CC=CC=C12	LWRQDNUXWLIWDB-VQHVLOKHSA-N	Phenylpropanoids and polyketides	Cinnamic acids and derivatives	Hydroxycinnamic acids and derivatives
p-Coumaroylferuloylcadaverine	C(\C=C\C1=CC=C(C=C1)O)(=O)N(CCCCCN)C(\C=C\C1=CC(OC)=C(O)C=C1)=O	IKOPWHMJLXPJFR-UQNWOCKMSA-N	Phenylpropanoids and polyketides	Cinnamic acids and derivatives	Hydroxycinnamic acids and derivatives
N-p-Coumaroyllysine	C(\C=C\C1=CC=C(C=C1)O)(=O)N[C@@H](CCCCN)C(=O)O	MLYIEMDMCVYQDU-PPGNKHEKSA-N	Organic acids and derivatives	Carboxylic acids and derivatives	Amino acids, peptides, and analogues
p-Coumaroyl-hydroxyagmatine	C(\C=C\C1=CC=C(C=C1)O)(=O)N(CCCCNC(N)=N)O	SVRMDYPDFPMDIY-VMPITWQZSA-N	Phenylpropanoids and polyketides	Cinnamic acids and derivatives	Hydroxycinnamic acids and derivatives
N-p-Coumaroylhydroxyagmatine	C(\C=C\C1=CC=C(C=C1)O)(=O)NC(NCCCCNO)=N	CLPWAIZKYVQZGV-VMPITWQZSA-N	Phenylpropanoids and polyketides	Cinnamic acids and derivatives	Hydroxycinnamic acids and derivatives
p-Coumaroylputrescine	C(\C=C\C1=CC=C(C=C1)O)(=O)NCCCCN	CJHDBEPXEKGBDW-VMPITWQZSA-N	Phenylpropanoids and polyketides	Cinnamic acids and derivatives	Hydroxycinnamic acids and derivatives
2-Piperidone	N1C(CCCC1)=O	XUWHAWMETYGRKB-UHFFFAOYSA-N	Organoheterocyclic compounds	Piperidines	Piperidinones
L-Pipecolic%20Acid	N1[C@@H](CCCC1)C(=O)O	HXEACLLIILLPRG-YFKPBYRVSA-N	Organic acids and derivatives	Carboxylic acids and derivatives	Amino acids, peptides, and analogues
N-Hydroxypipecolic%20acid	ON1C(CCCC1)C(=O)O	SEWARTPIJFHCRP-UHFFFAOYSA-N	Organic acids and derivatives	Carboxylic acids and derivatives	Amino acids, peptides, and analogues
Pipecolic%20acid	N1C(CCCC1)C(=O)O	HXEACLLIILLPRG-UHFFFAOYSA-N	Organic acids and derivatives	Carboxylic acids and derivatives	Amino acids, peptides, and analogues
Piperidine	N1CCCCC1	NQRYJNQNLNOLGT-UHFFFAOYSA-N	Organoheterocyclic compounds	Piperidines	Unassigned
1-Methoxyindole-3-Carboxylic%20Acid	CON1C=C(C2=CC=CC=C12)C(=O)O	NYXZLEZAQMDQPX-UHFFFAOYSA-N	Organoheterocyclic compounds	Indoles and derivatives	Indolecarboxylic acids and derivatives
2-(2-hydroxy-1H-indol-3-yl)-2-oxoacetic%20acid	OC=1NC2=CC=CC=C2C1C(C(=O)O)=O	AXSAUKZXDCMVJI-UHFFFAOYSA-N	Organoheterocyclic compounds	Indoles and derivatives	Indolyl carboxylic acids and derivatives
3-(2-oxopropyl)-3-hydroxyindolin-2-one	O=C(CC1(C(NC2=CC=CC=C12)=O)O)C	CBMTTXBZZZABGG-UHFFFAOYSA-N	Organoheterocyclic compounds	Indoles and derivatives	Indolines
3-Hydroxy-3-acetonyloxindole	OC1(C(NC2=CC=CC=C12)=O)CC(=O)C	CBMTTXBZZZABGG-UHFFFAOYSA-N	Organoheterocyclic compounds	Indoles and derivatives	Indolines
3-Indoleacrylic%20acid	N1C=C(C2=CC=CC=C12)C=CC(=O)O	PLVPPLCLBIEYEA-UHFFFAOYSA-N	Organoheterocyclic compounds	Indoles and derivatives	Indoles
3-Indolepropionic%20acid	N1C=C(C2=CC=CC=C12)CCC(=O)O	GOLXRNDWAUTYKT-UHFFFAOYSA-N	Organoheterocyclic compounds	Indoles and derivatives	Indolyl carboxylic acids and derivatives
5-Hydroxyindole-3-acetic%20acid	OC=1C=C2C(=CNC2=CC1)CC(=O)O	DUUGKQCEGZLZNO-UHFFFAOYSA-N	Organoheterocyclic compounds	Indoles and derivatives	Indolyl carboxylic acids and derivatives
Indole	N1C=CC2=CC=CC=C12	SIKJAQJRHWYJAI-UHFFFAOYSA-N	Organoheterocyclic compounds	Indoles and derivatives	Indoles
Indole-3-acetyl-L-aspartic%20acid	C(C)(=O)C([C@H](N)C(=O)O)C(=O)O.N1C=CC2=CC=CC=C12	VJHXAZZBZRMMBC-WBXITKJCSA-N	Organic acids and derivatives	Carboxylic acids and derivatives	Amino acids, peptides, and analogues
Indole-3-butyric%20acid	N1C=C(C2=CC=CC=C12)CCCC(=O)O	JTEDVYBZBROSJT-UHFFFAOYSA-N	Organoheterocyclic compounds	Indoles and derivatives	Indoles
Indole-3-carboxaldehyde	N1C=C(C2=CC=CC=C12)C=O	OLNJUISKUQQNIM-UHFFFAOYSA-N	Organoheterocyclic compounds	Indoles and derivatives	Indoles
Indole-3-carboxylic%20acid	N1C=C(C2=CC=CC=C12)C(=O)O	KMAKOBLIOCQGJP-UHFFFAOYSA-N	Organoheterocyclic compounds	Indoles and derivatives	Indolecarboxylic acids and derivatives
Indole-3-lactic%20acid	N1C=C(C2=CC=CC=C12)CC(C(=O)O)O	XGILAAMKEQUXLS-UHFFFAOYSA-N	Organoheterocyclic compounds	Indoles and derivatives	Indolyl carboxylic acids and derivatives
Indole-5-carboxylic%20acid	N1C=CC2=CC(=CC=C12)C(=O)O	IENZCGNHSIMFJE-UHFFFAOYSA-N	Organoheterocyclic compounds	Indoles and derivatives	Indolecarboxylic acids and derivatives
Indoline	N1CCC2=CC=CC=C12	LPAGFVYQRIESJQ-UHFFFAOYSA-N	Organoheterocyclic compounds	Indoles and derivatives	Indolines
Methoxyindoleacetic%20acid	COC1=C(NC2=CC=CC=C12)CC(=O)O	OJGBUOUGIMJJBY-UHFFFAOYSA-N	Organoheterocyclic compounds	Indoles and derivatives	Indolyl carboxylic acids and derivatives
N-Acetyl-5-hydroxytryptamine	C(C)(=O)NCCC1=CNC2=CC=C(C=C12)O	MVAWJSIDNICKHF-UHFFFAOYSA-N	Organoheterocyclic compounds	Indoles and derivatives	Hydroxyindoles
N-Acetylindole-3-carboxaldehyde	C(C)(=O)N1C=C(C2=CC=CC=C12)C=O	LCJLFGSKHBDOAY-UHFFFAOYSA-N	Organoheterocyclic compounds	Indoles and derivatives	Indoles
N-Acetylisatin	C(C)(=O)N1C(=O)C(=O)C2=CC=CC=C12	LPGDEHBASRKTDG-UHFFFAOYSA-N	Organoheterocyclic compounds	Indoles and derivatives	Unassigned
Oxindole	N1C(CC2=CC=CC=C12)=O	JYGFTBXVXVMTGB-UHFFFAOYSA-N	Organoheterocyclic compounds	Indoles and derivatives	Indolines
1,4-Dihydro-1-Methyl-4-oxo-3-pyridinecarboxamide	CN1C=C(C(C=C1)=O)C(=O)N	KTLRWTOPTKGYQY-UHFFFAOYSA-N	Organoheterocyclic compounds	Pyridines and derivatives	Pyridinecarboxylic acids and derivatives
1-Methyl-6-Oxo-1,6-Dihydropyridine-3-Carboxamide	CN1C=C(C=CC1=O)C(=O)N	JLQSXXWTCJPCBC-UHFFFAOYSA-N	Organoheterocyclic compounds	Pyridines and derivatives	Pyridinecarboxylic acids and derivatives
2,4,6,6-Tetramethyl-3(6H)-pyridinone	CC1=NC(C=C(C1=O)C)(C)C	TWOMTDIVYXTJET-UHFFFAOYSA-N	Organoheterocyclic compounds	Pyridines and derivatives	Hydropyridines
2-Hydroxypyridine	OC1=NC=CC=C1	UBQKCCHYAOITMY-UHFFFAOYSA-N	Organoheterocyclic compounds	Pyridines and derivatives	Hydropyridines
2-Picoline;%202-Methylpyridine	CC1=NC=CC=C1.N1=C(C=CC=C1)C	NMWDYLYNWRFEMR-UHFFFAOYSA-N	Organoheterocyclic compounds	Pyridines and derivatives	Methylpyridines
2-Picolinic%20acid	N1=C(C=CC=C1)C(=O)O	SIOXPEMLGUPBBT-UHFFFAOYSA-N	Organoheterocyclic compounds	Pyridines and derivatives	Pyridinecarboxylic acids and derivatives
6-Hydroxynicotinic%20acid	OC1=NC=C(C(=O)O)C=C1	BLHCMGRVFXRYRN-UHFFFAOYSA-N	Organoheterocyclic compounds	Pyridines and derivatives	Pyridinecarboxylic acids and derivatives
6-Methylnicotinamide	CC1=NC=C(C(=O)N)C=C1	IJXDURUAYOKSIS-UHFFFAOYSA-N	Organoheterocyclic compounds	Pyridines and derivatives	Pyridinecarboxylic acids and derivatives
5-O-p-Coumaroyl%20Galactonic%20Acid	C(\C=C\C1=CC=C(C=C1)O)(=O)O[C@@H]([C@@H]([C@@H]([C@H](C(=O)O)O)O)O)CO	UCFTVPWAWMMFEI-UAFUHELTSA-N	Phenylpropanoids and polyketides	Cinnamic acids and derivatives	Hydroxycinnamic acids and derivatives
3-O-p-Coumaroyl%20Galactonic%20Acid	C(\C=C\C1=CC=C(C=C1)O)(=O)O[C@H]([C@H](C(=O)O)O)[C@@H](O)[C@H](O)CO	ZJWAXZPCDIDPIL-HMLQMESCSA-N	Phenylpropanoids and polyketides	Cinnamic acids and derivatives	Hydroxycinnamic acids and derivatives
Nicotinamide-N-oxide	C(C1=CN=CC=C1)(=O)[NH2]=O	ZFFBMPJPNAHVLI-UHFFFAOYSA-N	Organoheterocyclic compounds	Pyridines and derivatives	Pyridinecarboxylic acids and derivatives
1-(Hydroxymethyl)hexahydro-1h-pyrrolizin-2-ol	OCC1C(CN2CCCC12)O	YEZAXZZXDSQLIA-UHFFFAOYSA-N	Organoheterocyclic compounds	Pyrrolizidines	Unassigned
3-Furfuryl-2-pyrrolecarboxylate	C(C1=CC=CO1)C1=C(NC=C1)C(=O)[O-]	MRTZXPRKQXMJMT-UHFFFAOYSA-M	Organoheterocyclic compounds	Pyrroles	Pyrrole carboxylic acids and derivatives
5-Hydroxy-2-pyrrolidinone	OC1CCC(N1)=O	WBGWUCXEMSSZJL-UHFFFAOYSA-N	Organoheterocyclic compounds	Pyrrolidines	Pyrrolidones
Pyrrole-2-carboxylic%20acid	N1C(=CC=C1)C(=O)O	WRHZVMBBRYBTKZ-UHFFFAOYSA-N	Organoheterocyclic compounds	Pyrroles	Pyrrole carboxylic acids and derivatives
Pyrrolidin	N1CCCC1	RWRDLPDLKQPQOW-UHFFFAOYSA-N	Organoheterocyclic compounds	Pyrrolidines	Unassigned
2,4-Dihydroxyquinoline	OC1=NC2=CC=CC=C2C(=C1)O	HDHQZCHIXUUSMK-UHFFFAOYSA-N	Organoheterocyclic compounds	Quinolines and derivatives	Quinolones and derivatives
2-Tridecyl-4(1H)-quinolone	C(CCCCCCCCCCCC)C=1NC2=CC=CC=C2C(C1)=O	FNWGQRPIGZVQLF-UHFFFAOYSA-N	Organoheterocyclic compounds	Quinolines and derivatives	Quinolones and derivatives
3,4-Dihydro-6,7-(methylenedioxy)-2(1H)-quinolinone	C1OC=2C=C3CCC(NC3=CC2O1)=O	DVTJKOLIEHUCKB-UHFFFAOYSA-N	Organoheterocyclic compounds	Quinolines and derivatives	Quinolones and derivatives
3-quinolinecarboxylic%20acid	N1=CC(=CC2=CC=CC=C12)C(=O)O	DJXNJVFEFSWHLY-UHFFFAOYSA-N	Organoheterocyclic compounds	Quinolines and derivatives	Quinoline carboxylic acids
4,6-Dihydroxyquinoline	OC1=CC=NC2=CC=C(C=C12)O	XFALURCRIGINGT-UHFFFAOYSA-N	Organoheterocyclic compounds	Quinolines and derivatives	Quinolones and derivatives
4,8-Dihydroxyquinoline-2-carboxylic%20acid	OC1=CC(=NC2=C(C=CC=C12)O)C(=O)O	FBZONXHGGPHHIY-UHFFFAOYSA-N	Organoheterocyclic compounds	Quinolines and derivatives	Quinoline carboxylic acids
4-Hydroxyquinoline	OC1=CC=NC2=CC=CC=C12	PMZDQRJGMBOQBF-UHFFFAOYSA-N	Organoheterocyclic compounds	Quinolines and derivatives	Quinolones and derivatives
8-hydroxyquinoline	OC=1C=CC=C2C=CC=NC12	MCJGNVYPOGVAJF-UHFFFAOYSA-N	Organoheterocyclic compounds	Quinolines and derivatives	8-hydroxyquinolines
Quinoline-4-carboxylic%20acid	N1=CC=C(C2=CC=CC=C12)C(=O)O	VQMSRUREDGBWKT-UHFFFAOYSA-N	Organoheterocyclic compounds	Quinolines and derivatives	Quinoline carboxylic acids
(2-carboxyethyl)-L-phenylalanine	C(=O)(O)CCN[C@@H](CC1=CC=CC=C1)C(=O)O	JJNKOTTTZLTYKO-JTQLQIEISA-N	Organic acids and derivatives	Carboxylic acids and derivatives	Amino acids, peptides, and analogues
1-O-p-Coumaroyllysine	C(\C=C\C1=CC=C(C=C1)O)(=O)OC([C@@H](N)CCCCN)=O	DLXZORKAHRJJSV-PPGNKHEKSA-N	Phenylpropanoids and polyketides	Cinnamic acids and derivatives	Hydroxycinnamic acids and derivatives
(3-hydroxypropanoyl)-L-leucine	OCCC(=O)N[C@@H](CC(C)C)C(=O)O	JUBMEPRPSWXXPA-ZETCQYMHSA-N	Organic acids and derivatives	Carboxylic acids and derivatives	Amino acids, peptides, and analogues
1-O-p-Coumaroyl%20Galactonic%20Acid	C(\C=C\C1=CC=C(C=C1)O)(=O)OC(=O)[C@H](O)[C@@H](O)[C@@H](O)[C@H](O)CO	QUNZEFJWXSFKET-UAFUHELTSA-N	Phenylpropanoids and polyketides	Cinnamic acids and derivatives	Hydroxycinnamic acids and derivatives
1-Amino-1-cyclobutane-carboxylic-acid	NC1(CCC1)C(=O)O	FVTVMQPGKVHSEY-UHFFFAOYSA-N	Organic acids and derivatives	Carboxylic acids and derivatives	Amino acids, peptides, and analogues
2,3-Diaminopropionic%20acid	NC(C(=O)O)CN	PECYZEOJVXMISF-UHFFFAOYSA-N	Organic acids and derivatives	Carboxylic acids and derivatives	Amino acids, peptides, and analogues
1-O-(p-coumaroyl)%203-Hydroxy-3-methylglutaric%20acid	C(\C=C\C1=CC=C(C=C1)O)(=O)OC(CC(CC(=O)O)(C)O)=O	VANUOTNTMUJWHY-QPJJXVBHSA-N	Phenylpropanoids and polyketides	Cinnamic acids and derivatives	Hydroxycinnamic acids and derivatives
3,4-Dihydroxy-L-phenylalanine%20(L-Dopa)	O=C(O)[C@@H](N)CC1=CC=C(O)C(O)=C1.OC=1C=C(C[C@H](N)C(=O)O)C=CC1O	VIYKYVYAKVNDPS-HKGPVOKGSA-N	Organic acids and derivatives	Carboxylic acids and derivatives	Amino acids, peptides, and analogues
3-(Pyrazol-1-yl)-L-alanine	N1(N=CC=C1)C[C@H](N)C(=O)O	PIGOPELHGLPKLL-YFKPBYRVSA-N	Organic acids and derivatives	Carboxylic acids and derivatives	Amino acids, peptides, and analogues
1-O-p-Coumaroylsedoheptulose	C(\C=C\C1=CC=C(C=C1)O)(=O)OCC(=O)[C@@H](O)[C@H](O)[C@H](O)[C@H](O)CO	SGFZUFUONOFDGD-HFJUBTFCSA-N	Phenylpropanoids and polyketides	Cinnamic acids and derivatives	Hydroxycinnamic acids and derivatives
3-Hydroxy-L-phenylalanine	OC=1C=C(C[C@H](N)C(=O)O)C=CC1	JZKXXXDKRQWDET-QMMMGPOBSA-N	Organic acids and derivatives	Carboxylic acids and derivatives	Amino acids, peptides, and analogues
3-Methoxytyrosine	COC=1C=C(C[C@H](N)C(=O)O)C=CC1O	PFDUUKDQEHURQC-ZETCQYMHSA-N	Organic acids and derivatives	Carboxylic acids and derivatives	Amino acids, peptides, and analogues
3-Methyl-L-Histidine	CN1C=NC=C1C[C@H](N)C(=O)O	JDHILDINMRGULE-LURJTMIESA-N	Organic acids and derivatives	Carboxylic acids and derivatives	Amino acids, peptides, and analogues
4-Hydroxy-L-Isoleucine	OC([C@@H]([C@H](N)C(=O)O)C)C	OSCCDBFHNMXNME-DSDZBIDZSA-N	Organic acids and derivatives	Carboxylic acids and derivatives	Amino acids, peptides, and analogues
4-Hydroxy-L-glutamic%20acid	OC(C[C@H](N)C(=O)O)C(=O)O	HBDWQSHEVMSFGY-SCQFTWEKSA-N	Organic acids and derivatives	Carboxylic acids and derivatives	Amino acids, peptides, and analogues
4-Hydroxy-L-phenylglycine	OC1=CC=C([C@H](N)C(=O)O)C=C1	LJCWONGJFPCTTL-ZETCQYMHSA-N	Organic acids and derivatives	Carboxylic acids and derivatives	Amino acids, peptides, and analogues
4-amino-5-(butylamino)-5-oxopentanoic%20acid	NC(CCC(=O)O)C(=O)NCCCC	FOHNSAGBWRRJKI-UHFFFAOYSA-N	Organic acids and derivatives	Carboxylic acids and derivatives	Amino acids, peptides, and analogues
5-Hydroxy-L-tryptophan	OC1=CC=C2NC=C(C[C@H](N)C(=O)O)C2=C1	LDCYZAJDBXYCGN-VIFPVBQESA-N	Organoheterocyclic compounds	Indoles and derivatives	Tryptamines and derivatives
5-Methoxy-DL-tryptophan	COC1=CC=C2NC=C(CC(N)C(=O)O)C2=C1	KVNPSKDDJARYKK-UHFFFAOYSA-N	Organoheterocyclic compounds	Indoles and derivatives	Tryptamines and derivatives
5-Oxo-L-Proline	O=C1CC[C@H](N1)C(=O)O	ODHCTXKNWHHXJC-VKHMYHEASA-N	Organic acids and derivatives	Carboxylic acids and derivatives	Amino acids, peptides, and analogues
5-Oxoproline	O=C1CC[C@H](N1)C(=O)O	ODHCTXKNWHHXJC-VKHMYHEASA-N	Organic acids and derivatives	Carboxylic acids and derivatives	Amino acids, peptides, and analogues
2,3-bis(2-carboxyphenyl)succinic%20acid	C(=O)(O)C1=C(C=CC=C1)C(C(=O)O)C(C(=O)O)C1=C(C=CC=C1)C(=O)O	ZBNIWVLAWNTUGO-UHFFFAOYSA-N
Alanylproline	N[C@@H](C)C(=O)N1[C@@H](CCC1)C(=O)O	WPWUFUBLGADILS-WDSKDSINSA-N	Organic acids and derivatives	Carboxylic acids and derivatives	Amino acids, peptides, and analogues
Aminomalonic%20acid	NC(C(=O)O)C(=O)O	JINBYESILADKFW-UHFFFAOYSA-N	Organic acids and derivatives	Carboxylic acids and derivatives	Amino acids, peptides, and analogues
Arginine%20methyl%20ester	COC([C@@H](N)CCCNC(N)=N)=O	ZDLDXNCMJBOYJV-YFKPBYRVSA-N	Organic acids and derivatives	Carboxylic acids and derivatives	Amino acids, peptides, and analogues
Cycloleucine	NC1(CCCC1)C(=O)O	NILQLFBWTXNUOE-UHFFFAOYSA-N	Organic acids and derivatives	Carboxylic acids and derivatives	Amino acids, peptides, and analogues
D-Allo-Isoleucine	N[C@H]([C@@H](C)CC)C(=O)O	AGPKZVBTJJNPAG-CRCLSJGQSA-N	Organic acids and derivatives	Carboxylic acids and derivatives	Amino acids, peptides, and analogues
D-Ornithine	N[C@H](CCCN)C(=O)O	AHLPHDHHMVZTML-SCSAIBSYSA-N	Organic acids and derivatives	Carboxylic acids and derivatives	Amino acids, peptides, and analogues
DL-Leucine	NC(CC(C)C)C(=O)O	ROHFNLRQFUQHCH-UHFFFAOYSA-N	Organic acids and derivatives	Carboxylic acids and derivatives	Amino acids, peptides, and analogues
DL-Methionine	NC(CCSC)C(=O)O	FFEARJCKVFRZRR-UHFFFAOYSA-N	Organic acids and derivatives	Carboxylic acids and derivatives	Amino acids, peptides, and analogues
DL-Tryptophan	NC(CC1=CNC2=CC=CC=C12)C(=O)O	QIVBCDIJIAJPQS-UHFFFAOYSA-N	Organoheterocyclic compounds	Indoles and derivatives	Indolyl carboxylic acids and derivatives
N-carboxy-N-(2-oxo-2-phenylethyl)-L-alanine	C(=O)(O)N([C@@H](C)C(=O)O)CC(C1=CC=CC=C1)=O	OLYSJXXEFYTLGD-QMMMGPOBSA-N	Organic oxygen compounds	Organooxygen compounds	Carbonyl compounds
Glutaryl-L-Leucine	C(CCCC(=O)O)(=O)N[C@@H](CC(C)C)C(=O)O	JYLHYOYRPZDJHM-QMMMGPOBSA-N	Organic acids and derivatives	Carboxylic acids and derivatives	Amino acids, peptides, and analogues
Glycyl-tryptophan	NCC(=O)N[C@@H](CC1=CNC2=CC=CC=C12)C(=O)O	AJHCSUXXECOXOY-NSHDSACASA-N	Organic acids and derivatives	Carboxylic acids and derivatives	Amino acids, peptides, and analogues
Homoproline	N1[C@@H](CCCC1)C(=O)O	HXEACLLIILLPRG-YFKPBYRVSA-N	Organic acids and derivatives	Carboxylic acids and derivatives	Amino acids, peptides, and analogues
Imino-Tryptophan	N=N[C@@H](CC1=CNC2=CC=CC=C12)C(=O)O	ACUCXMBEHJUDOZ-JTQLQIEISA-N	Organoheterocyclic compounds	Indoles and derivatives	Indolyl carboxylic acids and derivatives
Isoleucyl-Glutamyl-Leucine	N[C@@H]([C@@H](C)CC)C(=O)N[C@@H](CCC(=O)O)C(=O)N[C@@H](CC(C)C)C(=O)O	LPXHYGGZJOCAFR-MNXVOIDGSA-N	Organic acids and derivatives	Carboxylic acids and derivatives	Amino acids, peptides, and analogues
L-Alanyl-L-Phenylalanine	N[C@@H](C)C(=O)N[C@@H](CC1=CC=CC=C1)C(=O)O	OMNVYXHOSHNURL-WPRPVWTQSA-N	Organic acids and derivatives	Carboxylic acids and derivatives	Amino acids, peptides, and analogues
L-Alanyl-L-leucine	N[C@@H](C)C(=O)N[C@@H](CC(C)C)C(=O)O	RDIKFPRVLJLMER-BQBZGAKWSA-N	Organic acids and derivatives	Carboxylic acids and derivatives	Amino acids, peptides, and analogues
L-Allo-isoleucine	N[C@@H]([C@H](C)CC)C(=O)O	AGPKZVBTJJNPAG-UHNVWZDZSA-N	Organic acids and derivatives	Carboxylic acids and derivatives	Amino acids, peptides, and analogues
L-Arginine	N[C@@H](CCCNC(N)=N)C(=O)O	ODKSFYDXXFIFQN-BYPYZUCNSA-N	Organic acids and derivatives	Carboxylic acids and derivatives	Amino acids, peptides, and analogues
L-Aspartic%20Acid	N[C@@H](CC(=O)O)C(=O)O	CKLJMWTZIZZHCS-REOHCLBHSA-N	Organic acids and derivatives	Carboxylic acids and derivatives	Amino acids, peptides, and analogues
L-Aspartyl-L-Phenylalanine	N[C@@H](CC(=O)O)C(=O)N[C@@H](CC1=CC=CC=C1)C(=O)O	YZQCXOFQZKCETR-UWVGGRQHSA-N	Organic acids and derivatives	Carboxylic acids and derivatives	Amino acids, peptides, and analogues
L-Citrulline	N[C@@H](CCCNC(=O)N)C(=O)O	RHGKLRLOHDJJDR-BYPYZUCNSA-N	Organic acids and derivatives	Carboxylic acids and derivatives	Amino acids, peptides, and analogues
L-Cystine	C([C@@H](C(=O)O)N)SSC[C@@H](C(=O)O)N	LEVWYRKDKASIDU-IMJSIDKUSA-N	Organic acids and derivatives	Carboxylic acids and derivatives	Amino acids, peptides, and analogues
L-Diaminopimelic%20acid	N[C@@H](CCC[C@H](N)C(=O)O)C(=O)O	GMKMEZVLHJARHF-WHFBIAKZSA-N	Organic acids and derivatives	Carboxylic acids and derivatives	Amino acids, peptides, and analogues
L-Glutamic%20acid	N[C@@H](CCC(=O)O)C(=O)O	WHUUTDBJXJRKMK-VKHMYHEASA-N	Organic acids and derivatives	Carboxylic acids and derivatives	Amino acids, peptides, and analogues
L-Glutamine	N[C@@H](CCC(N)=O)C(=O)O	ZDXPYRJPNDTMRX-VKHMYHEASA-N	Organic acids and derivatives	Carboxylic acids and derivatives	Amino acids, peptides, and analogues
L-Glutamine%20tert-butyl%20ester	C(C)(C)(C)OC([C@@H](N)CCC(N)=O)=O	VVOPSEUXHSUTJS-LURJTMIESA-N	Organic acids and derivatives	Carboxylic acids and derivatives	Amino acids, peptides, and analogues
L-Glutaminyl-L-tryptophan	N[C@@H](CCC(N)=O)C(=O)N[C@@H](CC1=CNC2=CC=CC=C12)C(=O)O	ZQFAGNFSIZZYBA-AAEUAGOBSA-N	Organic acids and derivatives	Carboxylic acids and derivatives	Amino acids, peptides, and analogues
L-Glutamyl-L-Tyrosine	N[C@@H](CCC(=O)O)C(=O)N[C@@H](CC1=CC=C(C=C1)O)C(=O)O	YSWHPLCDIMUKFE-QWRGUYRKSA-N	Organic acids and derivatives	Carboxylic acids and derivatives	Amino acids, peptides, and analogues
L-Glycyl-L-phenylalanine	NCC(=O)N[C@@H](CC1=CC=CC=C1)C(=O)O	JBCLFWXMTIKCCB-VIFPVBQESA-N	Organic acids and derivatives	Carboxylic acids and derivatives	Amino acids, peptides, and analogues
L-Histidine	N[C@@H](CC1=CNC=N1)C(=O)O	HNDVDQJCIGZPNO-YFKPBYRVSA-N	Organic acids and derivatives	Carboxylic acids and derivatives	Amino acids, peptides, and analogues
L-Homocitrulline	N[C@@H](CCCCNC(=O)N)C(=O)O	XIGSAGMEBXLVJJ-YFKPBYRVSA-N	Organic acids and derivatives	Carboxylic acids and derivatives	Amino acids, peptides, and analogues
L-Homocysteine	N[C@@H](CCS)C(=O)O	FFFHZYDWPBMWHY-VKHMYHEASA-N	Organic acids and derivatives	Carboxylic acids and derivatives	Amino acids, peptides, and analogues
L-Homocystine	C(C[C@@H](C(=O)O)N)SSCC[C@@H](C(=O)O)N	ZTVZLYBCZNMWCF-WDSKDSINSA-N	Organic acids and derivatives	Carboxylic acids and derivatives	Amino acids, peptides, and analogues
L-Homomethionine	N[C@@H](CCCSC)C(=O)O	SFSJZXMDTNDWIX-YFKPBYRVSA-N	Organic acids and derivatives	Carboxylic acids and derivatives	Amino acids, peptides, and analogues
L-Isoleucine	N[C@@H]([C@@H](C)CC)C(=O)O	AGPKZVBTJJNPAG-WHFBIAKZSA-N	Organic acids and derivatives	Carboxylic acids and derivatives	Amino acids, peptides, and analogues
(3-(carboxyamino)-2-methylpropanoyl)phenylalanine	C(=O)(O)NCC(C(=O)N[C@@H](CC1=CC=CC=C1)C(=O)O)C	TVPRUKHBYIZTIY-UMJHXOGRSA-N	Organic acids and derivatives	Carboxylic acids and derivatives	Amino acids, peptides, and analogues
L-Isoserine	NC[C@H](O)C(=O)O	BMYNFMYTOJXKLE-REOHCLBHSA-N	Organic acids and derivatives	Carboxylic acids and derivatives	Amino acids, peptides, and analogues
L-Leucine	N[C@@H](CC(C)C)C(=O)O	ROHFNLRQFUQHCH-YFKPBYRVSA-N	Organic acids and derivatives	Carboxylic acids and derivatives	Amino acids, peptides, and analogues
L-Leucyl-L-Leucine	N[C@@H](CC(C)C)C(=O)N[C@@H](CC(C)C)C(=O)O	LCPYQJIKPJDLLB-UWVGGRQHSA-N	Organic acids and derivatives	Carboxylic acids and derivatives	Amino acids, peptides, and analogues
L-Leucyl-L-phenylalanine	N[C@@H](CC(C)C)C(=O)N[C@@H](CC1=CC=CC=C1)C(=O)O	KFKWRHQBZQICHA-STQMWFEESA-N	Organic acids and derivatives	Carboxylic acids and derivatives	Amino acids, peptides, and analogues
L-Lysine	N[C@@H](CCCCN)C(=O)O	KDXKERNSBIXSRK-YFKPBYRVSA-N	Organic acids and derivatives	Carboxylic acids and derivatives	Amino acids, peptides, and analogues
L-Lysine-Butanoic%20Acid	C(CCC)(=O)O.N[C@@H](CCCCN)C(=O)O	RAQUISHGVNOAMH-JEDNCBNOSA-N	Organic acids and derivatives	Carboxylic acids and derivatives	Amino acids, peptides, and analogues
L-Methionine	N[C@@H](CCSC)C(=O)O	FFEARJCKVFRZRR-BYPYZUCNSA-N	Organic acids and derivatives	Carboxylic acids and derivatives	Amino acids, peptides, and analogues
L-Methionine%20Sulfoxide	N[C@@H](CCS(=O)C)C(=O)O	QEFRNWWLZKMPFJ-YGVKFDHGSA-N	Organic acids and derivatives	Carboxylic acids and derivatives	Amino acids, peptides, and analogues
L-Norleucine	N[C@@H](CCCC)C(=O)O	LRQKBLKVPFOOQJ-YFKPBYRVSA-N	Organic acids and derivatives	Carboxylic acids and derivatives	Amino acids, peptides, and analogues
L-Ornithine	N[C@@H](CCCN)C(=O)O	AHLPHDHHMVZTML-BYPYZUCNSA-N	Organic acids and derivatives	Carboxylic acids and derivatives	Amino acids, peptides, and analogues
L-Phenylalanine	N[C@@H](CC1=CC=CC=C1)C(=O)O	COLNVLDHVKWLRT-QMMMGPOBSA-N	Organic acids and derivatives	Carboxylic acids and derivatives	Amino acids, peptides, and analogues
L-Phenylalaninol	N[C@@H](CC1=CC=CC=C1)CO	STVVMTBJNDTZBF-VIFPVBQESA-N	Benzenoids	Benzene and substituted derivatives	Phenethylamines
L-Proline	N1[C@@H](CCC1)C(=O)O	ONIBWKKTOPOVIA-BYPYZUCNSA-N	Organic acids and derivatives	Carboxylic acids and derivatives	Amino acids, peptides, and analogues
L-Prolyl-L-Leucine	N1[C@@H](CCC1)C(=O)N[C@@H](CC(C)C)C(=O)O	ZKQOUHVVXABNDG-IUCAKERBSA-N	Organic acids and derivatives	Carboxylic acids and derivatives	Amino acids, peptides, and analogues
L-Prolyl-L-Phenylalanine	N1[C@@H](CCC1)C(=O)N[C@@H](CC1=CC=CC=C1)C(=O)O	IWIANZLCJVYEFX-RYUDHWBXSA-N	Organic acids and derivatives	Carboxylic acids and derivatives	Amino acids, peptides, and analogues
L-Saccharopine	N[C@@H](CCCCN[C@H](C(=O)O)CCC(=O)O)C(=O)O	ZDGJAHTZVHVLOT-YUMQZZPRSA-N	Organic acids and derivatives	Carboxylic acids and derivatives	Amino acids, peptides, and analogues
L-Seryl-L-Isoleucine	N[C@@H](CO)C(=O)N[C@@H]([C@@H](C)CC)C(=O)O	BXLYSRPHVMCOPS-ACZMJKKPSA-N	Organic acids and derivatives	Carboxylic acids and derivatives	Amino acids, peptides, and analogues
L-Theanine	N[C@@H](CCC(=O)NCC)C(=O)O	DATAGRPVKZEWHA-YFKPBYRVSA-N	Organic acids and derivatives	Carboxylic acids and derivatives	Amino acids, peptides, and analogues
L-Tryptophan	N[C@@H](CC1=CNC2=CC=CC=C12)C(=O)O	QIVBCDIJIAJPQS-VIFPVBQESA-N	Organoheterocyclic compounds	Indoles and derivatives	Indolyl carboxylic acids and derivatives
L-Tyrosine%20methyl%20ester	COC([C@@H](N)CC1=CC=C(C=C1)O)=O	MWZPENIJLUWBSY-VIFPVBQESA-N	Organic acids and derivatives	Carboxylic acids and derivatives	Amino acids, peptides, and analogues
L-Tyrosine	N[C@@H](CC1=CC=C(C=C1)O)C(=O)O	OUYCCCASQSFEME-QMMMGPOBSA-N	Organic acids and derivatives	Carboxylic acids and derivatives	Amino acids, peptides, and analogues
L-Valine	N[C@@H](C(C)C)C(=O)O	KZSNJWFQEVHDMF-BYPYZUCNSA-N	Organic acids and derivatives	Carboxylic acids and derivatives	Amino acids, peptides, and analogues
L-Valyl-L-Leucine	N[C@@H](C(C)C)C(=O)N[C@@H](CC(C)C)C(=O)O	XCTHZFGSVQBHBW-IUCAKERBSA-N	Organic acids and derivatives	Carboxylic acids and derivatives	Amino acids, peptides, and analogues
L-Valyl-L-Phenylalanine	N[C@@H](C(C)C)C(=O)N[C@@H](CC1=CC=CC=C1)C(=O)O	GJNDXQBALKCYSZ-RYUDHWBXSA-N	Organic acids and derivatives	Carboxylic acids and derivatives	Amino acids, peptides, and analogues
L-isoleucyl-L-aspartyl-L-isoleucine	N[C@@H]([C@@H](C)CC)C(=O)N[C@@H](CC(=O)O)C(=O)N[C@@H]([C@@H](C)CC)C(=O)O	BGZIJZJBXRVBGJ-SXTJYALSSA-N	Organic acids and derivatives	Peptidomimetics	Hybrid peptides
Malonyltryptophan	C(CC(=O)O)(=O)N[C@@H](CC1=CNC2=CC=CC=C12)C(=O)O	OVEAWSPZRGBTSS-NSHDSACASA-N	Organic acids and derivatives	Carboxylic acids and derivatives	Amino acids, peptides, and analogues
Methyl%203-aminopropanoate	NCCC(=O)OC	UZCXPYDBYUEZCV-UHFFFAOYSA-N	Organic acids and derivatives	Carboxylic acids and derivatives	Amino acids, peptides, and analogues
Methyl%20L-pyroglutamate	N1[C@@H](CCC1=O)C(=O)OC	HQGPKMSGXAUKHT-BYPYZUCNSA-N	Organic acids and derivatives	Carboxylic acids and derivatives	Amino acids, peptides, and analogues
Methyldopa	CN[C@H](C(=O)O)CC1=CC=C(O)C(O)=C1	QZIWDCLHLOADPK-ZETCQYMHSA-N	Organic acids and derivatives	Carboxylic acids and derivatives	Amino acids, peptides, and analogues
N(6),N(6)-Dimethyl-L-lysine	CN(CCCC[C@H](N)C(=O)O)C	XXEWFEBMSGLYBY-ZETCQYMHSA-N	Organic acids and derivatives	Carboxylic acids and derivatives	Amino acids, peptides, and analogues
N,N-Dimethyl-L-histidine	CN([C@@H](CC1=CNC=N1)C(=O)O)C	IMOBSLOLPCWZKQ-ZETCQYMHSA-N	Organic acids and derivatives	Carboxylic acids and derivatives	Amino acids, peptides, and analogues
N,N-Dimethylglycine	CN(CC(=O)O)C	FFDGPVCHZBVARC-UHFFFAOYSA-N	Organic acids and derivatives	Carboxylic acids and derivatives	Amino acids, peptides, and analogues
N-(3-Indolylacetyl)-L-alanine	N1C=C(C2=CC=CC=C12)CC(=O)N[C@@H](C)C(=O)O	FBDCJLXTUCMFLF-QMMMGPOBSA-N	Organic acids and derivatives	Carboxylic acids and derivatives	Amino acids, peptides, and analogues
N-(Carboxymethyl)glycine	C(=O)(O)CNCC(=O)O	NBZBKCUXIYYUSX-UHFFFAOYSA-N	Organic acids and derivatives	Carboxylic acids and derivatives	Amino acids, peptides, and analogues
N-(acetyl)phenylalanine	C(C)(=O)N[C@@H](CC1=CC=CC=C1)C(=O)O	CBQJSKKFNMDLON-JTQLQIEISA-N	Organic acids and derivatives	Carboxylic acids and derivatives	Amino acids, peptides, and analogues
N-(malonyl)phenylalanine	C(CC(=O)O)(=O)N[C@@H](CC1=CC=CC=C1)C(=O)O	IHAMOIOWKITHQZ-VIFPVBQESA-N	Organic acids and derivatives	Carboxylic acids and derivatives	Amino acids, peptides, and analogues
N-(malonyl)tryptophan	C(CC(=O)O)(=O)N[C@@H](CC1=CNC2=CC=CC=C12)C(=O)O	OVEAWSPZRGBTSS-NSHDSACASA-N	Organic acids and derivatives	Carboxylic acids and derivatives	Amino acids, peptides, and analogues
2-prop-2-ynylcyclohexa-2,5-diene-1,4-dione	C(C#C)C=1C(C=CC(C1)=O)=O	VZBQHXOIUBBACH-UHFFFAOYSA-N	Organic oxygen compounds	Organooxygen compounds	Carbonyl compounds
N-Acetyl-6-hydroxy-L-tryptophan	C(C)(=O)N[C@@H](CC1=CNC2=CC(=CC=C12)O)C(=O)O	SRHPKORNWUUECV-LBPRGKRZSA-N	Organic acids and derivatives	Carboxylic acids and derivatives	Amino acids, peptides, and analogues
N-Acetyl-DL-phenylalanine	C(C)(=O)NC(CC1=CC=CC=C1)C(=O)O	CBQJSKKFNMDLON-UHFFFAOYSA-N	Organic acids and derivatives	Carboxylic acids and derivatives	Amino acids, peptides, and analogues
N-Acetyl-L-Arginine	C(C)(=O)N[C@@H](CCCNC(N)=N)C(=O)O	SNEIUMQYRCDYCH-LURJTMIESA-N	Organic acids and derivatives	Carboxylic acids and derivatives	Amino acids, peptides, and analogues
N-Acetyl-L-Aspartic%20Acid	C(C)(=O)N[C@@H](CC(=O)O)C(=O)O	OTCCIMWXFLJLIA-BYPYZUCNSA-N	Organic acids and derivatives	Carboxylic acids and derivatives	Amino acids, peptides, and analogues
N-Acetyl-L-Glutamine	C(C)(=O)N[C@@H](CCC(N)=O)C(=O)O	KSMRODHGGIIXDV-YFKPBYRVSA-N	Organic acids and derivatives	Carboxylic acids and derivatives	Amino acids, peptides, and analogues
N-Acetyl-L-Methionine	C(C)(=O)N[C@@H](CCSC)C(=O)O	XUYPXLNMDZIRQH-LURJTMIESA-N	Organic acids and derivatives	Carboxylic acids and derivatives	Amino acids, peptides, and analogues
N-Acetyl-L-Tryptophan	C(C)(=O)N[C@@H](CC1=CNC2=CC=CC=C12)C(=O)O	DZTHIGRZJZPRDV-LBPRGKRZSA-N	Organic acids and derivatives	Carboxylic acids and derivatives	Amino acids, peptides, and analogues
N-Acetyl-L-glutamic%20acid	C(C)(=O)N[C@@H](CCC(=O)O)C(=O)O	RFMMMVDNIPUKGG-YFKPBYRVSA-N	Organic acids and derivatives	Carboxylic acids and derivatives	Amino acids, peptides, and analogues
N-Acetyl-L-hydroxyproline	C(C)(=O)N1[C@@H](C[C@@H](O)C1)C(=O)O	BAPRUDZDYCKSOQ-RITPCOANSA-N	Organic acids and derivatives	Carboxylic acids and derivatives	Amino acids, peptides, and analogues
N-Acetyl-L-leucine	C(C)(=O)N[C@@H](CC(C)C)C(=O)O	WXNXCEHXYPACJF-ZETCQYMHSA-N	Organic acids and derivatives	Carboxylic acids and derivatives	Amino acids, peptides, and analogues
N-Acetyl-L-phenylalanine	C(C)(=O)N[C@@H](CC1=CC=CC=C1)C(=O)O	CBQJSKKFNMDLON-JTQLQIEISA-N	Organic acids and derivatives	Carboxylic acids and derivatives	Amino acids, peptides, and analogues
N-Acetyl-L-threonine	C(C)(=O)N[C@@H]([C@H](O)C)C(=O)O	PEDXUVCGOLSNLQ-WUJLRWPWSA-N	Organic acids and derivatives	Carboxylic acids and derivatives	Amino acids, peptides, and analogues
N-Acetyl-L-tyrosine	C(C)(=O)N[C@@H](CC1=CC=C(C=C1)O)C(=O)O	CAHKINHBCWCHCF-JTQLQIEISA-N	Organic acids and derivatives	Carboxylic acids and derivatives	Amino acids, peptides, and analogues
N-Ethylglycine	C(C)NCC(=O)O	YPIGGYHFMKJNKV-UHFFFAOYSA-N	Organic acids and derivatives	Carboxylic acids and derivatives	Amino acids, peptides, and analogues
N-Ethylphenylalanine	C(C)N[C@@H](CC1=CC=CC=C1)C(=O)O	ZHLKFJCNKZEBNG-JTQLQIEISA-N	Organic acids and derivatives	Carboxylic acids and derivatives	Amino acids, peptides, and analogues
N-Glycyl-L-leucine	NCC(=O)N[C@@H](CC(C)C)C(=O)O	DKEXFJVMVGETOO-LURJTMIESA-N	Organic acids and derivatives	Carboxylic acids and derivatives	Amino acids, peptides, and analogues
N-Methyl-Trans-4-Hydroxy-L-Proline	CN1[C@@H](C[C@H](C1)O)C(=O)O	FMIPNAUMSPFTHK-UHNVWZDZSA-N	Organic acids and derivatives	Carboxylic acids and derivatives	Amino acids, peptides, and analogues
N-Methylisoleucine	CN[C@@H]([C@@H](C)CC)C(=O)O	KSPIYJQBLVDRRI-WDSKDSINSA-N	Organic acids and derivatives	Carboxylic acids and derivatives	Amino acids, peptides, and analogues
N-Palmitoylglycine	C(CCCCCCCCCCCCCCC)(=O)NCC(=O)O	KVTFEOAKFFQCCX-UHFFFAOYSA-N	Organic acids and derivatives	Carboxylic acids and derivatives	Amino acids, peptides, and analogues
N-Phenylacetylglycine	C1(=CC=CC=C1)CC(=O)NCC(=O)O	UTYVDVLMYQPLQB-UHFFFAOYSA-N	Organic acids and derivatives	Carboxylic acids and derivatives	Amino acids, peptides, and analogues
N-acetyl-tryptophan	C(C)(=O)N[C@@H](CC1=CNC2=CC=CC=C12)C(=O)O	DZTHIGRZJZPRDV-LBPRGKRZSA-N	Organic acids and derivatives	Carboxylic acids and derivatives	Amino acids, peptides, and analogues
4-O-acetyl-3-O-caffeoyl-2-C-methyl-D-erythronate	C(C)(=O)OC[C@H]([C@](C(=O)[O-])(O)C)OC(\C=C\C1=CC(O)=C(O)C=C1)=O	PIIKFXOSDWHBSH-LNRYFFFSSA-M	Phenylpropanoids and polyketides	Cinnamic acids and derivatives	Hydroxycinnamic acids and derivatives
N-methylphenylalanine	CN[C@@H](CC1=CC=CC=C1)C(=O)O	SCIFESDRCALIIM-VIFPVBQESA-N	Organic acids and derivatives	Carboxylic acids and derivatives	Amino acids, peptides, and analogues
N5-(4-Methoxybenzyl)glutamine	COC1=CC=C(CNC(CC[C@H](N)C(=O)O)=O)C=C1	MLNAECTVQFEWFD-NSHDSACASA-N	Organic acids and derivatives	Carboxylic acids and derivatives	Amino acids, peptides, and analogues
N6-Acetyl-L-lysine	C(C)(=O)NCCCC[C@H](N)C(=O)O	DTERQYGMUDWYAZ-ZETCQYMHSA-N	Organic acids and derivatives	Carboxylic acids and derivatives	Amino acids, peptides, and analogues
Nitroarginine	[N+](=O)([O-])N[C@@H](CCCNC(N)=N)C(=O)O	WRLUODMOTSXWIP-BYPYZUCNSA-N	Organic acids and derivatives	Carboxylic acids and derivatives	Amino acids, peptides, and analogues
O-Acetyl-L-homoserine	C(C)(=O)OCC[C@H](N)C(=O)O	FCXZBWSIAGGPCB-YFKPBYRVSA-N	Organic acids and derivatives	Carboxylic acids and derivatives	Amino acids, peptides, and analogues
O-Acetylserine	C(C)(=O)OC[C@H](N)C(=O)O	VZXPDPZARILFQX-BYPYZUCNSA-N	Organic acids and derivatives	Carboxylic acids and derivatives	Amino acids, peptides, and analogues
Phenylacetyl-L-glutamine	C1(=CC=CC=C1)CC(=O)N[C@@H](CCC(N)=O)C(=O)O	JFLIEFSWGNOPJJ-JTQLQIEISA-N	Organic acids and derivatives	Carboxylic acids and derivatives	Amino acids, peptides, and analogues
Prolylproline	N1[C@@H](CCC1)C(=O)N1[C@@H](CCC1)C(=O)O	RWCOTTLHDJWHRS-YUMQZZPRSA-N	Organic acids and derivatives	Carboxylic acids and derivatives	Amino acids, peptides, and analogues
Pyroglutamic%20acid	N1[C@@H](CCC1=O)C(=O)O	ODHCTXKNWHHXJC-VKHMYHEASA-N	Organic acids and derivatives	Carboxylic acids and derivatives	Amino acids, peptides, and analogues
S-(Methyl)glutathione	CSC[C@H](NC(CC[C@H](N)C(=O)O)=O)C(=O)NCC(=O)O	QTQDDTSVRVWHMO-BQBZGAKWSA-N	Organic acids and derivatives	Carboxylic acids and derivatives	Amino acids, peptides, and analogues
S-Methyl-L-cysteine	CSC[C@H](N)C(=O)O	IDIDJDIHTAOVLG-VKHMYHEASA-N	Organic acids and derivatives	Carboxylic acids and derivatives	Amino acids, peptides, and analogues
S-Ribosyl-L-homocysteine	C1([C@H](O)[C@H](O)[C@H](O1)CO)SCC[C@H](N)C(=O)O	LQBYCHHWIZJWRE-BLELIYKESA-N	Organic oxygen compounds	Organooxygen compounds	Carbohydrates and carbohydrate conjugates
Suberylglycine	C(CCCCCCC(=O)O)(=O)NCC(=O)O	HXATVKDSYDWTCX-UHFFFAOYSA-N	Organic acids and derivatives	Carboxylic acids and derivatives	Amino acids, peptides, and analogues
Succinyl%20arginine	C(CCC(=O)O)(=O)N[C@@H](CCCNC(N)=N)C(=O)O	UMOXFSXIFQOWTD-LURJTMIESA-N	Organic acids and derivatives	Carboxylic acids and derivatives	Amino acids, peptides, and analogues
Trans-4-Hydroxy-L-proline	O[C@@H]1C[C@H](NC1)C(=O)O	PMMYEEVYMWASQN-DMTCNVIQSA-N	Organic acids and derivatives	Carboxylic acids and derivatives	Amino acids, peptides, and analogues
Tridecanoylglycine	C(CCCCCCCCCCCC)(=O)NCC(=O)O	BTHNNPTZHGZNAO-UHFFFAOYSA-N	Organic acids and derivatives	Carboxylic acids and derivatives	Amino acids, peptides, and analogues
Trimethyllysine	C[C@](N(C)C)(CCCCN)C(=O)O	YOZNFSJEWZFKCV-VIFPVBQESA-N	Organic acids and derivatives	Carboxylic acids and derivatives	Amino acids, peptides, and analogues
Tyrosylleucine	N[C@@H](CC1=CC=C(C=C1)O)C(=O)N[C@@H](CC(C)C)C(=O)O	AUEJLPRZGVVDNU-STQMWFEESA-N	Organic acids and derivatives	Carboxylic acids and derivatives	Amino acids, peptides, and analogues
cis-4-Hydroxy-D-proline	O[C@@H]1C[C@@H](NC1)C(=O)O	PMMYEEVYMWASQN-QWWZWVQMSA-N	Organic acids and derivatives	Carboxylic acids and derivatives	Amino acids, peptides, and analogues
ethyl-L-arginine	C(C)N[C@@H](CCCNC(N)=N)C(=O)O	BUVCJVSDXCCEOY-LURJTMIESA-N	Organic acids and derivatives	Carboxylic acids and derivatives	Amino acids, peptides, and analogues
N-Acetoxy-glucosyl-alanine	C(C)(=O)ON([C@@H](C)C(=O)O)C1[C@H](O)[C@@H](O)[C@H](O)[C@H](O1)CO	MWUOZFDGBZFJGF-DINXXXFLSA-N	Organic acids and derivatives	Carboxylic acids and derivatives	Amino acids, peptides, and analogues
2'-Hydroxy-2-methoxychalcone	OC1=C(C(/C=C/C2=C(C=CC=C2)OC)=O)C=CC=C1	SNTIPKTZVAKPOX-ZHACJKMWSA-N	Phenylpropanoids and polyketides	Linear 1,3-diarylpropanoids	Chalcones and dihydrochalcones
3,4,2',4',6'-Pentahydroxychalcone	OC=1C=C(C=CC1O)\C=C\C(=O)C1=C(C=C(C=C1O)O)O	CRBYNQCDRNZCNX-DUXPYHPUSA-N	Phenylpropanoids and polyketides	Linear 1,3-diarylpropanoids	Chalcones and dihydrochalcones
4'-Hydroxychalcone	OC1=CC=C(C(/C=C/C2=CC=CC=C2)=O)C=C1	UAHGNXFYLAJDIN-IZZDOVSWSA-N	Phenylpropanoids and polyketides	Linear 1,3-diarylpropanoids	Chalcones and dihydrochalcones
Phloretin	OC1=CC=C(CCC(=O)C=2C(O)=CC(O)=CC2O)C=C1	VGEREEWJJVICBM-UHFFFAOYSA-N	Phenylpropanoids and polyketides	Linear 1,3-diarylpropanoids	Chalcones and dihydrochalcones
2-hydroxynaringenin	O[C@@]1(OC=2C=C(C=C(C2C(C1)=O)O)O)C1=CC=C(O)C=C1	NFENYLPEYDNIMO-HNNXBMFYSA-N	Phenylpropanoids and polyketides	Flavonoids	Hydroxyflavonoids
2,5-O-Di-CinnamylSorbitol	C(C=CC1=CC=CC=C1)[C@@](CO)(O)[C@@H](O)[C@H](O)[C@H](OCC=CC1=CC=CC=C1)CO	BYVKBCDJZSXZEW-LWSSLDFYSA-N	Lipids and lipid-like molecules	Fatty Acyls	Fatty alcohols
Octadeca-2,9,12,15-tetraen-1-ol	C(C=CCCCCCC=CCC=CCC=CCC)O	XOBGWXMZEADDHU-UHFFFAOYSA-N	Lipids and lipid-like molecules	Fatty Acyls	Fatty alcohols
2',3',4',5,7-pentahydroxyflavone	OC1=C(C=2OC3=CC(=CC(=C3C(C2)=O)O)O)C=CC(=C1O)O	MIRFNZKXFFLSRY-UHFFFAOYSA-N	Phenylpropanoids and polyketides	Flavonoids	Flavones
3,7,3'-Trihydroxyflavone	OC1=C(OC2=CC(=CC=C2C1=O)O)C1=CC(=CC=C1)O	PSGKFXVPVUNGDT-UHFFFAOYSA-N	Phenylpropanoids and polyketides	Flavonoids	Flavones
4',5-Dihydroxy-3',5'-dimethoxyflavone	OC1=C(C=C(C=2OC3=CC=CC(=C3C(C2)=O)O)C=C1OC)OC	BTTNEDIXDIOSHP-UHFFFAOYSA-N	Phenylpropanoids and polyketides	Flavonoids	O-methylated flavonoids
4',5-Dihydroxyflavone	OC1=CC=C(C=2OC3=CC=CC(=C3C(C2)=O)O)C=C1	OKRNDQLCMXUCGG-UHFFFAOYSA-N	Phenylpropanoids and polyketides	Flavonoids	Flavones
5,7,2'-Trihydroxy-8-methoxyflavone	OC1=C2C(C=C(OC2=C(C(=C1)O)OC)C1=C(C=CC=C1)O)=O	XCBMYKIKEHGYAR-UHFFFAOYSA-N	Phenylpropanoids and polyketides	Flavonoids	O-methylated flavonoids
5,7,4'-Trimethoxyflavone	COC1=C2C(C=C(OC2=CC(=C1)OC)C1=CC=C(C=C1)OC)=O	ZXJJBDHPUHUUHD-UHFFFAOYSA-N	Phenylpropanoids and polyketides	Flavonoids	O-methylated flavonoids
5-Hydroxyflavone	OC1=C2C(C=C(OC2=CC=C1)C1=CC=CC=C1)=O	IYBLVRRCNVHZQJ-UHFFFAOYSA-N	Phenylpropanoids and polyketides	Flavonoids	Flavones
6,2'-Dihydroxyflavone	OC=1C=C2C(C=C(OC2=CC1)C1=C(C=CC=C1)O)=O	YCGXYGWBHFKQHY-UHFFFAOYSA-N	Phenylpropanoids and polyketides	Flavonoids	Flavones
6-Hydroxy-2'-methoxyflavone	OC=1C=C2C(C=C(OC2=CC1)C1=C(C=CC=C1)OC)=O	OOGPSPVFDWHSGX-UHFFFAOYSA-N	Phenylpropanoids and polyketides	Flavonoids	O-methylated flavonoids
6-Hydroxyluteolin	OC1=C(C=2C(C=C(OC2C=C1O)C1=CC(O)=C(O)C=C1)=O)O	VYAKIUWQLHRZGK-UHFFFAOYSA-N	Phenylpropanoids and polyketides	Flavonoids	Flavones
3,4-Dihydroxybenzoic%20acid%20(Protocatechuic%20acid)	C(C1=CC(O)=C(O)C=C1)(=O)O.OC=1C=C(C(=O)O)C=CC1O	RINSJDWDXSWUOK-UHFFFAOYSA-N	Benzenoids	Benzene and substituted derivatives	Benzoic acids and derivatives
3-Hydroxy-4-methoxybenzoic%20acid;%20Isovanillic%20Acid	C(C1=CC(O)=C(OC)C=C1)(=O)O.OC=1C=C(C(=O)O)C=CC1OC	HDSCGXDUDBCMSH-UHFFFAOYSA-N	Benzenoids	Benzene and substituted derivatives	Benzoic acids and derivatives
3,5-Dihydroxy-7,4'-dimethoxyflavone	OC1=C(OC2=CC(=CC(=C2C1=O)O)OC)C1=CC=C(C=C1)OC	KZBAXKKOXPLOBX-UHFFFAOYSA-N	Phenylpropanoids and polyketides	Flavonoids	Flavones
Kaempferol%20(3,5,7,4'-Tetrahydroxyflavone)	OC1=C(OC2=CC(=CC(=C2C1=O)O)O)C1=CC=C(C=C1)O.O1C(=C(O)C(=O)C=2C(O)=CC(O)=CC12)C1=CC=C(O)C=C1	NHLRLBJZRLVLJH-UHFFFAOYSA-N	Phenylpropanoids and polyketides	Flavonoids	Flavones
2,6,7,4'-Tetrahydroxyisoflavanone	OC1OC2=CC(=C(C=C2C(C1C1=CC=C(C=C1)O)=O)O)O	CHAPEFQUHPSDAL-UHFFFAOYSA-N	Phenylpropanoids and polyketides	Isoflavonoids	Isoflavans
6,7-Dimethoxy-4-chromanone	COC=1C=C2C(CCOC2=CC1OC)=O	VLVVIOPAGWPOJW-UHFFFAOYSA-N	Organoheterocyclic compounds	Benzopyrans	1-benzopyrans
Xanthone	C1=CC=CC=2OC3=CC=CC=C3C(C12)=O	JNELGWHKGNBSMD-UHFFFAOYSA-N	Organoheterocyclic compounds	Benzopyrans	1-benzopyrans
4-Hydroxycoumarin	OC1=CC(OC2=CC=CC=C12)=O	VXIXUWQIVKSKSA-UHFFFAOYSA-N	Phenylpropanoids and polyketides	Coumarins and derivatives	Hydroxycoumarins
4-methoxy-5-hydroxymethylcoumarin	COC1=CC(OC2=CC=CC(=C12)CO)=O	QXXWNUBMVOCZMN-UHFFFAOYSA-N	Phenylpropanoids and polyketides	Coumarins and derivatives	Unassigned
5,7-Dihydroxy-4-methylcoumarin	OC1=C2C(=CC(OC2=CC(=C1)O)=O)C	QNVWGEJMXOQQPM-UHFFFAOYSA-N	Phenylpropanoids and polyketides	Coumarins and derivatives	Hydroxycoumarins
5,7-Dihydroxycoumarin	OC1=C2C=CC(OC2=CC(=C1)O)=O	KIQQFVJHWNCGAU-UHFFFAOYSA-N	Phenylpropanoids and polyketides	Coumarins and derivatives	Hydroxycoumarins
6,7-Dihydroxy-4-methylcoumarin	OC=1C=C2C(=CC(OC2=CC1O)=O)C	KVOJTUXGYQVLAJ-UHFFFAOYSA-N	Phenylpropanoids and polyketides	Coumarins and derivatives	Hydroxycoumarins
6-Hydroxy-4-methylcoumarin	OC=1C=C2C(=CC(OC2=CC1)=O)C	IRUHWRSITUYICV-UHFFFAOYSA-N	Phenylpropanoids and polyketides	Coumarins and derivatives	Hydroxycoumarins
6-Methoxycoumarin	COC=1C=C2C=CC(OC2=CC1)=O	VKVCJIMMVPXDQD-UHFFFAOYSA-N	Phenylpropanoids and polyketides	Coumarins and derivatives	Unassigned
6-hydroxycoumarin	OC=1C=C2C=CC(OC2=CC1)=O	CJIJXIFQYOPWTF-UHFFFAOYSA-N	Phenylpropanoids and polyketides	Coumarins and derivatives	Hydroxycoumarins
7,8-Dihydroxy-4-methylcoumarin	OC1=CC=C2C(=CC(OC2=C1O)=O)C	NWQBYMPNIJXFNQ-UHFFFAOYSA-N	Phenylpropanoids and polyketides	Coumarins and derivatives	Hydroxycoumarins
7,8-Dihydroxy-4-phenylcoumarin	OC1=CC=C2C(=CC(OC2=C1O)=O)C1=CC=CC=C1	JRVIIPJSVKTPBK-UHFFFAOYSA-N	Phenylpropanoids and polyketides	Neoflavonoids	Neoflavones
7,8-Dimethoxy-6-hydroxycoumarin	COC1=C(C=C2C=CC(OC2=C1OC)=O)O	ULJXDXSBXDSMLE-UHFFFAOYSA-N	Phenylpropanoids and polyketides	Coumarins and derivatives	Hydroxycoumarins
7-Hydroxy-4-methyl-8-nitrocoumarin	OC1=CC=C2C(=CC(OC2=C1[N+](=O)[O-])=O)C	BGUBUSIGKOWDPO-UHFFFAOYSA-N	Phenylpropanoids and polyketides	Coumarins and derivatives	Hydroxycoumarins
7-Hydroxy-4-methylcoumarin	OC1=CC=C2C(=CC(OC2=C1)=O)C	HSHNITRMYYLLCV-UHFFFAOYSA-N	Phenylpropanoids and polyketides	Coumarins and derivatives	Hydroxycoumarins
7-Hydroxy-8-Methoxychromanon	OC1=CC=C2CCC(OC2=C1OC)=O	USFPEDPRWFLWFC-UHFFFAOYSA-N	Phenylpropanoids and polyketides	3,4-dihydrocoumarins	Unassigned
7-Methoxy-6-methyldihydrocoumarin	COC1=C(C=C2CCC(OC2=C1)=O)C	UHLIKFZENQLFGR-UHFFFAOYSA-N	Phenylpropanoids and polyketides	3,4-dihydrocoumarins	Unassigned
7-Methoxycoumarin	COC1=CC=C2C=CC(OC2=C1)=O	LIIALPBMIOVAHH-UHFFFAOYSA-N	Phenylpropanoids and polyketides	Coumarins and derivatives	Unassigned
8-Hydroxycoumarin	OC=1C=CC=C2C=CC(OC12)=O	DPTUTXWBBUARQB-UHFFFAOYSA-N	Phenylpropanoids and polyketides	Coumarins and derivatives	Hydroxycoumarins
8-Methoxycoumarin	COC=1C=CC=C2C=CC(OC12)=O	ODRDTKMYQDXVGG-UHFFFAOYSA-N	Phenylpropanoids and polyketides	Coumarins and derivatives	Unassigned
Coumarin	O1C(=O)C=CC2=CC=CC=C12	ZYGHJZDHTFUPRJ-UHFFFAOYSA-N	Phenylpropanoids and polyketides	Coumarins and derivatives	Unassigned
Glutathione%20reduced%20form	C(CC(=O)N[C@@H](CS)C(=O)NCC(=O)O)[C@@H](C(=O)O)N	RWSXRVCMGQZWBV-WDSKDSINSA-N	Organic acids and derivatives	Carboxylic acids and derivatives	Amino acids, peptides, and analogues
1,14-Tetradecanedioic%20Acid	C(CCCCCCCCCCCCC(=O)O)(=O)O	HQHCYKULIHKCEB-UHFFFAOYSA-N	Lipids and lipid-like molecules	Fatty Acyls	Fatty acids and conjugates
1-Eicosanol	C(CCCCCCCCCCCCCCCCCCC)O	BTFJIXJJCSYFAL-UHFFFAOYSA-N	Lipids and lipid-like molecules	Fatty Acyls	Fatty alcohols
1-Octadecanol	C(CCCCCCCCCCCCCCCCC)O	GLDOVTGHNKAZLK-UHFFFAOYSA-N	Lipids and lipid-like molecules	Fatty Acyls	Fatty alcohols
10,14,16-Octadecatrien-12-Ynoic%20Acid	C(CCCCCCCCC=CC#CC=CC=CC)(=O)O	KDVOULUCGQGVQH-UHFFFAOYSA-N	Lipids and lipid-like molecules	Fatty Acyls	Fatty acids and conjugates
10,16-Dihydroxypalmitic%20acid	OC(CCCCCCCCC(=O)O)CCCCCCO	VJZBXAQGWLMYMS-UHFFFAOYSA-N	Lipids and lipid-like molecules	Fatty Acyls	Fatty acids and conjugates
10-Hydroxystearic%20Acid	OC(CCCCCCCCC(=O)O)CCCCCCCC	PAZZVPKITDJCPV-UHFFFAOYSA-N	Lipids and lipid-like molecules	Fatty Acyls	Fatty acids and conjugates
12,13-Epoxy-9-Octadecenoic%20Acid	C(CCCCCCCC=CCC1C(CCCCC)O1)(=O)O	CCPPLLJZDQAOHD-UHFFFAOYSA-N	Lipids and lipid-like molecules	Fatty Acyls	Fatty acids and conjugates
3-Hydrocinnamyl-6-CinnamylGlucose	C(CCC1=CC=CC=C1)[C@]([C@H](C=O)O)(O)[C@H](O)[C@H](O)C(O)CC=CC1=CC=CC=C1	KVGAXCMVFFRCOX-OMENTWMHSA-N
12-Hydroxyoctadecanoic%20acid	OC(CCCCCCCCCCC(=O)O)CCCCCC	ULQISTXYYBZJSJ-UHFFFAOYSA-N	Lipids and lipid-like molecules	Fatty Acyls	Fatty acids and conjugates
12-Oxo-5,8,10,14-eicosatetraenoic%20acid	O=C(C=CC=CCC=CCCCC(=O)O)CC=CCCCCC	GURBRQGDZZKITB-UHFFFAOYSA-N	Lipids and lipid-like molecules	Fatty Acyls	Fatty acids and conjugates
13,16-Docosadienamide	C(CCCCCCCCCCCC=CCC=CCCCCC)(=O)N	QLGRRECBQIEJMM-UHFFFAOYSA-N	Lipids and lipid-like molecules	Fatty Acyls	Fatty amides
13-Amino-13-oxotridecanoic%20acid	NC(CCCCCCCCCCCC(=O)O)=O	FHRQTSVMKLZYME-UHFFFAOYSA-N	Lipids and lipid-like molecules	Fatty Acyls	Fatty acids and conjugates
13-methylmyristic%20acid	CC(CCCCCCCCCCCC(=O)O)C	ZOCYQVNGROEVLU-UHFFFAOYSA-N	Lipids and lipid-like molecules	Fatty Acyls	Fatty acids and conjugates
15(R)-Hydroxylinoleic%20Acid	O[C@@H](C\C=C/C\C=C/CCCCCCCC(=O)O)CCC	MZQXAWAWDWCIKG-SPSBLGDNSA-N	Lipids and lipid-like molecules	Fatty Acyls	Lineolic acids and derivatives
15-Tetracosenoic%20acid	C(CCCCCCCCCCCCCC=CCCCCCCCC)(=O)O	GWHCXVQVJPWHRF-UHFFFAOYSA-N	Lipids and lipid-like molecules	Fatty Acyls	Fatty acids and conjugates
16-Methylheptadecanoic%20acid	CC(CCCCCCCCCCCCCCC(=O)O)C	XDOFQFKRPWOURC-UHFFFAOYSA-N	Lipids and lipid-like molecules	Fatty Acyls	Fatty acids and conjugates
17-Octadecynoic%20acid	C(CCCCCCCCCCCCCCCC#C)(=O)O	DZIILFGADWDKMF-UHFFFAOYSA-N	Lipids and lipid-like molecules	Fatty Acyls	Fatty acids and conjugates
2-Dodecenedioic%20acid	C(C=CCCCCCCCCC(=O)O)(=O)O	MAZWDMBCPDUFDJ-UHFFFAOYSA-N	Lipids and lipid-like molecules	Fatty Acyls	Fatty acids and conjugates
2-Hydroxyhexadecanoic%20acid	OC(C(=O)O)CCCCCCCCCCCCCC	JGHSBPIZNUXPLA-UHFFFAOYSA-N	Lipids and lipid-like molecules	Fatty Acyls	Fatty acids and conjugates
2-oxononadecanoic%20acid	O=C(C(=O)O)CCCCCCCCCCCCCCCCC	GLFSTVQYXPOBGJ-UHFFFAOYSA-N	Lipids and lipid-like molecules	Fatty Acyls	Fatty acids and conjugates
2R-Hydroxyoctadecanoic%20Acid	O[C@@H](C(=O)O)CCCCCCCCCCCCCCCC	KIHBGTRZFAVZRV-QGZVFWFLSA-N	Lipids and lipid-like molecules	Fatty Acyls	Fatty acids and conjugates
3-Hydroxy-palmitic%20acid%20methyl%20ester	COC(CC(CCCCCCCCCCCCC)O)=O	YBTWUESFQWFDMR-UHFFFAOYSA-N	Lipids and lipid-like molecules	Fatty Acyls	Fatty alcohols
3-Hydroxyhexadecanoic%20acid	OC(CC(=O)O)CCCCCCCCCCCCC	CBWALJHXHCJYTE-UHFFFAOYSA-N	Lipids and lipid-like molecules	Fatty Acyls	Fatty acids and conjugates
3-Hydroxyoctadecanoic%20Acid	OC(CC(=O)O)CCCCCCCCCCCCCCC	POMQYTSPMKEQNB-UHFFFAOYSA-N	Lipids and lipid-like molecules	Fatty Acyls	Fatty acids and conjugates
3-oxopalmiticacid	O=C(CC(=O)O)CCCCCCCCCCCCC	ASICPMTWQSESKX-UHFFFAOYSA-N	Lipids and lipid-like molecules	Fatty Acyls	Fatty acids and conjugates
4-Oxo-9,11,13,15-Octadecatetraenoic%20Acid	O=C(CCC(=O)O)CCCCC=CC=CC=CC=CCC	ZYOSGENSARGRME-UHFFFAOYSA-N	Lipids and lipid-like molecules	Fatty Acyls	Lineolic acids and derivatives
8,11,14,17-Eicosatetraenoic%20acid	C(CCCCCCC=CCC=CCC=CCC=CCC)(=O)O	HQPCSDADVLFHHO-UHFFFAOYSA-N	Lipids and lipid-like molecules	Fatty Acyls	Fatty acids and conjugates
8,11-Heptadecadienoic%20acid	C(CCCCCCC=CCC=CCCCCC)(=O)O	ZYJWXPONROMNOE-UHFFFAOYSA-N	Lipids and lipid-like molecules	Fatty Acyls	Fatty acids and conjugates
8,15-Dihydroxy-5,9,11,13-eicosatetraenoic%20acid	OC(CC=CCCCC(=O)O)C=CC=CC=CC(CCCCC)O	NNPWRKSGORGTIM-UHFFFAOYSA-N	Lipids and lipid-like molecules	Fatty Acyls	Eicosanoids
8,9-Dihydroxy-5,11,14,17-eicosatetraenoic%20acid	OC(CC=CCCCC(=O)O)C(CC=CCC=CCC=CCC)O	NXFSSCYFERVGJQ-UHFFFAOYSA-N	Lipids and lipid-like molecules	Fatty Acyls	Eicosanoids
9,10,11-Trihydroxy-12-octadecenoic%20acid	OC(CCCCCCCC(=O)O)C(C(C=CCCCCC)O)O	JHGVFGJXFVIYSM-UHFFFAOYSA-N	Lipids and lipid-like molecules	Fatty Acyls	Fatty acids and conjugates
9,10,13-Trihydroxy-11-Octadecenoic%20Acid	OC(CCCCCCCC(=O)O)C(C=CC(CCCCC)O)O	NTVFQBIHLSPEGQ-UHFFFAOYSA-N	Lipids and lipid-like molecules	Fatty Acyls	Fatty acids and conjugates
9,10,18-Trihydroxystearic%20acid	OC(CCCCCCCC(=O)O)C(CCCCCCCCO)O	OISFHODBOQNZAG-UHFFFAOYSA-N	Lipids and lipid-like molecules	Fatty Acyls	Fatty acids and conjugates
9,10-Dihydroxy-12,13-epoxyoctadecanoic%20acid	OC(CCCCCCCC(=O)O)C(CC1C(CCCCC)O1)O	ZOMBDDWLMOSVKT-UHFFFAOYSA-N	Lipids and lipid-like molecules	Fatty Acyls	Fatty acids and conjugates
9,12,13-Trihydroxy-10,15-octadecadienoic%20acid	OC(CCCCCCCC(=O)O)C=CC(C(CC=CCC)O)O	MKYUCBXUUSZMQB-UHFFFAOYSA-N	Lipids and lipid-like molecules	Fatty Acyls	Lineolic acids and derivatives
9,12-Octadecadiynoic%20Acid	C(CCCCCCCC#CCC#CCCCCC)(=O)O	KDYILQLPKVZDGB-UHFFFAOYSA-N	Lipids and lipid-like molecules	Fatty Acyls	Fatty acids and conjugates
9,16-Dihydroxypalmitic%20acid	OC(CCCCCCCC(=O)O)CCCCCCCO	XSIHTLJPWOWWPE-UHFFFAOYSA-N	Lipids and lipid-like molecules	Fatty Acyls	Fatty acids and conjugates
9-Hydroxy-10,12,15-octadecatrienoic%20acid	OC(CCCCCCCC(=O)O)C=CC=CCC=CCC	RIGGEAZDTKMXSI-UHFFFAOYSA-N	Lipids and lipid-like molecules	Fatty Acyls	Lineolic acids and derivatives
9-Hydroxy-13-oxo-10-octadecenoic%20Acid	OC(CCCCCCCC(=O)O)C=CCC(CCCCC)=O	HOWCTVFHRUJMDQ-UHFFFAOYSA-N	Lipids and lipid-like molecules	Fatty Acyls	Lineolic acids and derivatives
9-Oxo-10,12-Octadecadienoic%20Acid	O=C(CCCCCCCC(=O)O)C=CC=CCCCCC	LUZSWWYKKLTDHU-UHFFFAOYSA-N	Lipids and lipid-like molecules	Fatty Acyls	Lineolic acids and derivatives
9-Oxononanoic%20acid	O=CCCCCCCCC(=O)O	WLGDDELKYAWBBL-UHFFFAOYSA-N	Lipids and lipid-like molecules	Fatty Acyls	Fatty acids and conjugates
9-Oxooctadeca-10,12-Dienoic%20Acid	O=C(CCCCCCCC(=O)O)C=CC=CCCCCC	LUZSWWYKKLTDHU-UHFFFAOYSA-N	Lipids and lipid-like molecules	Fatty Acyls	Lineolic acids and derivatives
Arachidic%20acid	C(CCCCCCCCCCCCCCCCCCC)(=O)O	VKOBVWXKNCXXDE-UHFFFAOYSA-N	Lipids and lipid-like molecules	Fatty Acyls	Fatty acids and conjugates
Arachidonic%20Acid	C(CCC\C=C/C\C=C/C\C=C/C\C=C/CCCCC)(=O)O	YZXBAPSDXZZRGB-DOFZRALJSA-N	Lipids and lipid-like molecules	Fatty Acyls	Fatty acids and conjugates
Azelaic%20acid	C(CCCCCCCC(=O)O)(=O)O	BDJRBEYXGGNYIS-UHFFFAOYSA-N	Lipids and lipid-like molecules	Fatty Acyls	Fatty acids and conjugates
Beta-Hydroxypalmitic%20Acid	OC(CC(=O)O)CCCCCCCCCCCCC	CBWALJHXHCJYTE-UHFFFAOYSA-N	Lipids and lipid-like molecules	Fatty Acyls	Fatty acids and conjugates
Cis-4,7,10,13,16,19-Docosahexaenoic%20Acid	C(CC\C=C/CC=CCC=CCC=CCC=CCC=CCC)(=O)O	MBMBGCFOFBJSGT-GOTKOHCTSA-N	Lipids and lipid-like molecules	Fatty Acyls	Fatty acids and conjugates
DL-2-hydroxystearic%20acid	OC(C(=O)O)CCCCCCCCCCCCCCCC	KIHBGTRZFAVZRV-UHFFFAOYSA-N	Lipids and lipid-like molecules	Fatty Acyls	Fatty acids and conjugates
Docosapentaenoic%20acid	C(C=CC=CC=CC=CC=CCCCCCCCCCCC)(=O)O	YEKFYCQGYMVFKR-UHFFFAOYSA-N	Lipids and lipid-like molecules	Fatty Acyls	Fatty acids and conjugates
Dodecanoic%20acid%20(Lauric%20acid)	C(CCCCCCCCCCC)(=O)O.C(CCCCCCCCCCC)(=O)O	WLGSIWNFEGRXDF-UHFFFAOYSA-N	Lipids and lipid-like molecules	Fatty Acyls	Fatty acids and conjugates
Eicosadienoic%20acid	C(C=CC=CCCCCCCCCCCCCCCC)(=O)O	LNAVIIOBBICBIS-UHFFFAOYSA-N	Lipids and lipid-like molecules	Fatty Acyls	Fatty acids and conjugates
Eicosenoic%20acid	C(C=CCCCCCCCCCCCCCCCCC)(=O)O	FIKTURVKRGQNQD-UHFFFAOYSA-N	Lipids and lipid-like molecules	Fatty Acyls	Fatty acids and conjugates
Elaidic%20Acid	C(CCCCCCC\C=C\CCCCCCCC)(=O)O	ZQPPMHVWECSIRJ-MDZDMXLPSA-N	Lipids and lipid-like molecules	Fatty Acyls	Fatty acids and conjugates
Erucic%20acid	C(CCCCCCCCCCC\C=C/CCCCCCCC)(=O)O	DPUOLQHDNGRHBS-KTKRTIGZSA-N	Lipids and lipid-like molecules	Fatty Acyls	Fatty acids and conjugates
Ethyl%20linoleate	C(CCCCCCC\C=C/C\C=C/CCCCC)(=O)OCC	FMMOOAYVCKXGMF-MURFETPASA-N	Lipids and lipid-like molecules	Fatty Acyls	Lineolic acids and derivatives
Heptadecanoic%20acid	C(CCCCCCCCCCCCCCCC)(=O)O	KEMQGTRYUADPNZ-UHFFFAOYSA-N	Lipids and lipid-like molecules	Fatty Acyls	Fatty acids and conjugates
Hexadecanedioic%20acid	C(CCCCCCCCCCCCCCC(=O)O)(=O)O	QQHJDPROMQRDLA-UHFFFAOYSA-N	Lipids and lipid-like molecules	Fatty Acyls	Fatty acids and conjugates
Hydroperoxylinoleic%20acid	O(O)C(C(=O)O)CCCCCC\C=C/C\C=C/CCCCC	ZBNXJJKFWACAPS-HZJYTTRNSA-N	Lipids and lipid-like molecules	Fatty Acyls	Lineolic acids and derivatives
Hydroxy%20ricinoleic%20acid	OC(C(=O)O)CCCCCC\C=C/C[C@H](O)CCCCCC	AHYVTIQHWOJJOY-ZPCKWCKBSA-N	Lipids and lipid-like molecules	Fatty Acyls	Fatty acids and conjugates
Methyl%2012-phenyldodecanoate	C1(=CC=CC=C1)CCCCCCCCCCCC(=O)OC	UOGDZQUHDFHJKP-UHFFFAOYSA-N	Lipids and lipid-like molecules	Fatty Acyls	Fatty acid esters
Myristamide	C(CCCCCCCCCCCCC)(=O)N	QEALYLRSRQDCRA-UHFFFAOYSA-N	Lipids and lipid-like molecules	Fatty Acyls	Fatty amides
Octadec-6-enoic%20acid;%20Petroselinic%20acid	C(CCCC\C=C/CCCCCCCCCCC)(=O)O.C(CCCCC=CCCCCCCCCCCC)(=O)O	PEPLYFKDJRTLKB-USGGBSEESA-N	Lipids and lipid-like molecules	Fatty Acyls	Fatty acids and conjugates
Octadeca-11E,13E,15Z-trienoic%20acid	C(CCCCCCCCC\C=C\C=C\C=C/CC)(=O)O	ZSXWVPXJLXTOQQ-ZRGCPWHVSA-N	Lipids and lipid-like molecules	Fatty Acyls	Lineolic acids and derivatives
Octadeca-9,12,15-trienoic%20acid	C(CCCCCCCC=CCC=CCC=CCC)(=O)O	DTOSIQBPPRVQHS-UHFFFAOYSA-N	Lipids and lipid-like molecules	Fatty Acyls	Lineolic acids and derivatives
Oleamide%20(9-Octadecenamide)	C(CCCCCCCC=CCCCCCCCC)(=O)N.C(CCCCCCC\C=C/CCCCCCCC)(=O)N	QPUQNFRDMXWYKM-KVVVOXFISA-N	Lipids and lipid-like molecules	Fatty Acyls	Fatty amides
Palmitaldehyde	C(CCCCCCCCCCCCCCC)=O	NIOYUNMRJMEDGI-UHFFFAOYSA-N	Lipids and lipid-like molecules	Fatty Acyls	Fatty aldehydes
Palmitic%20acid	C(CCCCCCCCCCCCCCC)(=O)O	IPCSVZSSVZVIGE-UHFFFAOYSA-N	Lipids and lipid-like molecules	Fatty Acyls	Fatty acids and conjugates
Pentadecanoic%20Acid	C(CCCCCCCCCCCCCC)(=O)O	WQEPLUUGTLDZJY-UHFFFAOYSA-N	Lipids and lipid-like molecules	Fatty Acyls	Fatty acids and conjugates
Phytol	CC(C)CCC[C@@H](C)CCC[C@@H](C)CCC\C(\C)=C\CO	BOTWFXYSPFMFNR-PYDDKJGSSA-N	Lipids and lipid-like molecules	Prenol lipids	Diterpenoids
Pimelic%20acid	C(CCCCCC(=O)O)(=O)O	WLJVNTCWHIRURA-UHFFFAOYSA-N	Lipids and lipid-like molecules	Fatty Acyls	Fatty acids and conjugates
Stearic%20Acid	C(CCCCCCCCCCCCCCCCC)(=O)O	QIQXTHQIDYTFRH-UHFFFAOYSA-N	Lipids and lipid-like molecules	Fatty Acyls	Fatty acids and conjugates
Stearidonic%20acid	C(CCCC\C=C/C\C=C/C\C=C/C\C=C/CC)(=O)O	JIWBIWFOSCKQMA-LTKCOYKYSA-N	Lipids and lipid-like molecules	Fatty Acyls	Lineolic acids and derivatives
Suberic%20Acid	C(CCCCCCC(=O)O)(=O)O	TYFQFVWCELRYAO-UHFFFAOYSA-N	Lipids and lipid-like molecules	Fatty Acyls	Fatty acids and conjugates
Tetracosanoic%20Acid%20(Lignoceric%20acid)	C(CCCCCCCCCCCCCCCCCCCCCCC)(=O)O.C(CCCCCCCCCCCCCCCCCCCCCCC)(=O)O	CBYCSRICVDBHMZ-UHFFFAOYSA-N	Lipids and lipid-like molecules	Fatty Acyls	Fatty acids and conjugates
Tridecanedioic%20acid	C(CCCCCCCCCCCC(=O)O)(=O)O	DXNCZXXFRKPEPY-UHFFFAOYSA-N	Lipids and lipid-like molecules	Fatty Acyls	Fatty acids and conjugates
Undecanedioic%20acid	C(CCCCCCCCCC(=O)O)(=O)O	LWBHHRRTOZQPDM-UHFFFAOYSA-N	Lipids and lipid-like molecules	Fatty Acyls	Fatty acids and conjugates
Undecylic%20Acid	C(CCCCCCCCCC)(=O)O	ZDPHROOEEOARMN-UHFFFAOYSA-N	Lipids and lipid-like molecules	Fatty Acyls	Fatty acids and conjugates
alpha-Hydroxylinoleic%20acid	OC(C(=O)O)CCCCCC\C=C/C\C=C/CCCCC	AFDSETGKYZMEEA-HZJYTTRNSA-N	Lipids and lipid-like molecules	Fatty Acyls	Lineolic acids and derivatives
1-Linoleoylglycerol	C(CCCCCCC\C=C/C\C=C/CCCCC)(=O)OCC(O)CO	WECGLUPZRHILCT-HZJYTTRNSA-N	Lipids and lipid-like molecules	Fatty Acyls	Lineolic acids and derivatives
1-Oleoyl-Sn-Glycerol	C(CCCCCCC\C=C/CCCCCCCC)(=O)OC[C@@H](O)CO	RZRNAYUHWVFMIP-QJRAZLAKSA-N	Lipids and lipid-like molecules	Glycerolipids	Monoradylglycerols
1-Palmitoleoyl-Glycerol	C(CCCCCCC\C=C/CCCCCC)(=O)OCC(O)CO	KVYUBFKSKZWZSV-FPLPWBNLSA-N	Lipids and lipid-like molecules	Glycerolipids	Monoradylglycerols
1-Stearidonoyl-Glycerol	C(CCCC\C=C/C\C=C/C\C=C/C\C=C/CC)(=O)OCC(O)CO	YICVZGXPPMTJCG-LTKCOYKYSA-N	Lipids and lipid-like molecules	Fatty Acyls	Lineolic acids and derivatives
2-Linoleoylglycerol	C(CCCCCCC\C=C/C\C=C/CCCCC)(=O)OC(CO)CO	IEPGNWMPIFDNSD-HZJYTTRNSA-N	Lipids and lipid-like molecules	Fatty Acyls	Lineolic acids and derivatives
2-Palmitoleoyl-Glycerol	C(CCCCCCC\C=C/CCCCCC)(=O)OC(CO)CO	CXUXMSACCLYMBI-FPLPWBNLSA-N	Lipids and lipid-like molecules	Glycerolipids	Monoradylglycerols
2-Palmitoylglycerol	C(CCCCCCCCCCCCCCC)(=O)OC(CO)CO	BBNYCLAREVXOSG-UHFFFAOYSA-N	Lipids and lipid-like molecules	Glycerolipids	Monoradylglycerols
Glycidyl%20Linoleate	C(CCCCCCC\C=C/C\C=C/CCCCC)(=O)OCC1CO1	LOGTZDQTPQYKEN-HZJYTTRNSA-N	Lipids and lipid-like molecules	Fatty Acyls	Lineolic acids and derivatives
2-(2,3-dihydroxypropoxy)-3-(((2-(dimethylamino)ethoxy)(hydroxy)phosphoryl)oxy)propyl%20(8E,11Z,14Z)-octadeca-8,11,14-trienoate	C(CCCCCC\C=C\C\C=C/C\C=C/CCC)(=O)OCC(COP(=O)(O)OCCN(C)C)OCC(CO)O	RSFWCFKQURMWGV-KDCPEZKGSA-N
12-Hydroxyoctadec-9-Enoic%20Acid;%20Ricinoleic%20acid	C(CCCCCCC\C=C/C[C@H](O)CCCCCC)(=O)O.OC(CC=CCCCCCCCC(=O)O)CCCCCC	UDCGYHLLBVVETC-DPMBMXLASA-N	Lipids and lipid-like molecules	Fatty Acyls	Fatty acids and conjugates
3-(((2-(dimethylamino)ethoxy)(hydroxy)phosphoryl)oxy)-2-hydroxypropyl%20(9Z,12Z,15E)-octadeca-9,12,15-trienoate	C(CCCCCCC\C=C/C\C=C/C\C=C\CC)(=O)OCC(COP(=O)(O)OCCN(C)C)O	IARVOLJTNAWHEK-KFGXGMAESA-N
linoleoyl%20ethanolamine	C(CCCCCCC\C=C/C\C=C/CCCCC)(=O)C(O)CN	UJBQBFSBLHXWLB-HZJYTTRNSA-N	Organic oxygen compounds	Organooxygen compounds	Carbohydrates and carbohydrate conjugates
1-(((2-(dimethylamino)ethoxy)(hydroxy)phosphoryl)oxy)-3-hydroxypropan-2-yl%20(9Z,12Z)-octadeca-9,12-dienoate	C(CCCCCCC\C=C/C\C=C/CCCCC)(=O)OC(COP(=O)(O)OCCN(C)C)CO	QJJIWMVGRPIDRR-MURFETPASA-N
3-(((2-(dimethylamino)ethoxy)(hydroxy)phosphoryl)oxy)-2-hydroxypropyl%20(9Z,12Z)-octadeca-9,12-dienoate	C(CCCCCCC\C=C/C\C=C/CCCCC)(=O)OCC(COP(=O)(O)OCCN(C)C)O	PCNHVNAKBGVVGJ-MURFETPASA-N
3-(((2-(dimethylamino)ethoxy)(hydroxy)phosphoryl)oxy)-2-hydroxypropyl%20oleate	C(CCCCCCC\C=C/CCCCCCCC)(=O)OCC(COP(=O)(O)OCCN(C)C)O	AGFJMPFGOAJUSU-QXMHVHEDSA-N
2-(2,3-dihydroxypropoxy)-3-(((2-(dimethylamino)ethoxy)(hydroxy)phosphoryl)oxy)propan-2-yl%20(E)-hexadec-9-enoate	C(CCCCCCC\C=C\CCCCCC)(=O)OC(C)(COP(=O)(O)OCCN(C)C)OCC(CO)O	FTTGMBCFXXDBPZ-ZHACJKMWSA-N	Organic acids and derivatives	Organic phosphoric acids and derivatives	Phosphate esters
1-(2,3-dihydroxypropoxy)-3-(((2-(dimethylamino)ethoxy)(hydroxy)phosphoryl)oxy)propan-2-yl%20(11Z,14Z)-octadeca-11,14-dienoate	C(CCCCCCCCC\C=C/C\C=C/CCC)(=O)OC(COCC(CO)O)COP(=O)(O)OCCN(C)C	NQYUARKXQXGOCD-HZJYTTRNSA-N
2-(2,3-dihydroxypropoxy)-3-(((2-(dimethylamino)ethoxy)(hydroxy)phosphoryl)oxy)propyl%20(11Z,14Z)-octadeca-11,14-dienoate	C(CCCCCCCCC\C=C/C\C=C/CCC)(=O)OCC(COP(=O)(O)OCCN(C)C)OCC(CO)O	LWAXLTKRRDMDOP-HZJYTTRNSA-N
1-(2,3-dihydroxypropoxy)-3-(((2-(dimethylamino)ethoxy)(hydroxy)phosphoryl)oxy)propan-2-yl%20palmitate	C(CCCCCCCCCCCCCCC)(=O)OC(COCC(CO)O)COP(=O)(O)OCCN(C)C	UGDSENDBQIIAJL-UHFFFAOYSA-N
Macrophypene%20B	C[C@]1(CCC2C3CCC[C@@](C3CC=C2[C@@H]1O)(C)O)C=C	FXYFBNYLSVPFCE-ITLOBLNZSA-N	Lipids and lipid-like molecules	Prenol lipids	Sesquiterpenoids
Diosmetin-7-O-rutinoside%20(Diosmin)	C[C@H]1[C@@H]([C@H]([C@H]([C@@H](O1)OC[C@@H]2[C@H]([C@@H]([C@H]([C@@H](O2)OC3=CC(=C4C(=C3)OC(=CC4=O)C5=CC(=C(C=C5)OC)O)O)O)O)O)O)O)O	GZSOSUNBTXMUFQ-YFAPSIMESA-N	Phenylpropanoids and polyketides	Flavonoids	Flavonoid glycosides
Cornusoside%20A	C[C@H]1C[C@H]2[C@@H]([C@H]1O[C@H]3[C@@H]([C@H]([C@@H]([C@H](O3)CO)O)O)O)[C@H](C(=O)O2)C(=O)OC	XYMMADIQVIQGGS-HWXRFMIWSA-N	Lipids and lipid-like molecules	Fatty Acyls	Fatty acyl glycosides
1-Arabinosyluracil	C1([C@@H](O)[C@H](O)[C@H](O)CO1)N1C(=O)NC(=O)C=C1	CYFJUPFBCYRZFA-STUHELBRSA-N	Organoheterocyclic compounds	Diazines	Pyrimidines and pyrimidine derivatives
2-Aminooctadecane-1,4-diol	NC(CO)CC(CCCCCCCCCCCCCC)O	OZGVEPKWZPMSAC-UHFFFAOYSA-N	Organic nitrogen compounds	Organonitrogen compounds	Amines
4-Hydroxysphingosine	O/C(/[C@H]([C@H](CO)N)O)=C\CCCCCCCCCCCCC	KUHIPZQDBQNOMT-JJULMGOSSA-N	Organic nitrogen compounds	Organonitrogen compounds	Amines
1,7-Dimethylxanthine	CN1C(=O)NC=2N=CN(C2C1=O)C	QUNWUDVFRNGTCO-UHFFFAOYSA-N	Organoheterocyclic compounds	Imidazopyrimidines	Purines and purine derivatives
9-(Arabinosyl)hypoxanthine	C1([C@@H](O)[C@H](O)[C@H](O)CO1)N1C=2N=CNC(C2N=C1)=O	UKUBRHKAZHFGHP-KBNQYOMWSA-N	Organic acids and derivatives	Carboxylic acids and derivatives	Amino acids, peptides, and analogues
1-Methyladenine	CN1C=NC2=NC=NC2=C1N	HPZMWTNATZPBIH-UHFFFAOYSA-N	Organoheterocyclic compounds	Imidazopyrimidines	Purines and purine derivatives
1-Methylxanthine	CN1C(=O)NC=2N=CNC2C1=O	MVOYJPOZRLFTCP-UHFFFAOYSA-N	Organoheterocyclic compounds	Imidazopyrimidines	Purines and purine derivatives
2'-Deoxyadenosine	[C@@H]1(C[C@H](O)[C@@H](CO)O1)N1C=NC=2C(N)=NC=NC12	OLXZPDWKRNYJJZ-RRKCRQDMSA-N	Nucleosides, nucleotides, and analogues	Purine nucleosides	Purine 2'-deoxyribonucleosides
2'-Deoxyadenosine-5'-monophosphate	P(=O)(O)(O)OC[C@@H]1[C@H](C[C@@H](O1)N1C=NC=2C(N)=NC=NC12)O	KHWCHTKSEGGWEX-RRKCRQDMSA-N	Nucleosides, nucleotides, and analogues	Purine nucleotides	Purine deoxyribonucleotides
2'-Deoxycytidine	[C@@H]1(C[C@H](O)[C@@H](CO)O1)N1C(=O)N=C(N)C=C1	CKTSBUTUHBMZGZ-SHYZEUOFSA-N	Nucleosides, nucleotides, and analogues	Pyrimidine nucleosides	Pyrimidine 2'-deoxyribonucleosides
2'-Deoxyguanosine	[C@@H]1(C[C@H](O)[C@@H](CO)O1)N1C=NC=2C(=O)NC(N)=NC12	YKBGVTZYEHREMT-KVQBGUIXSA-N	Nucleosides, nucleotides, and analogues	Purine nucleosides	Purine 2'-deoxyribonucleosides
2'-Deoxyinosine-5'-monophosphate	P(=O)(O)(O)OC[C@@H]1[C@H](C[C@@H](O1)N1C=NC=2C(O)=NC=NC12)O	PHNGFPPXDJJADG-RRKCRQDMSA-N	Nucleosides, nucleotides, and analogues	Purine nucleotides	Purine deoxyribonucleotides
2'-Deoxyuridine	[C@@H]1(C[C@H](O)[C@@H](CO)O1)N1C(=O)NC(=O)C=C1	MXHRCPNRJAMMIM-SHYZEUOFSA-N	Nucleosides, nucleotides, and analogues	Pyrimidine nucleosides	Pyrimidine 2'-deoxyribonucleosides
2'-O-Methyladenosine	CO[C@H]1[C@@H](O[C@@H]([C@H]1O)CO)N1C=NC=2C(N)=NC=NC12	FPUGCISOLXNPPC-IOSLPCCCSA-N	Nucleosides, nucleotides, and analogues	Purine nucleosides	Unassigned
2-Aminopurine	NC1=NC=C2NC=NC2=N1	MWBWWFOAEOYUST-UHFFFAOYSA-N	Organoheterocyclic compounds	Imidazopyrimidines	Purines and purine derivatives
3'-Adenylic%20Acid	[C@@H]1([C@H](O)[C@H](OP(=O)(O)O)[C@@H](CO)O1)N1C=NC=2C(N)=NC=NC12	LNQVTSROQXJCDD-KQYNXXCUSA-N	Nucleosides, nucleotides, and analogues	Ribonucleoside 3'-phosphates	Unassigned
3-Methylxanthine	CN1C(NC(C=2NC=NC12)=O)=O	GMSNIKWWOQHZGF-UHFFFAOYSA-N	Organoheterocyclic compounds	Imidazopyrimidines	Purines and purine derivatives
5'-Deoxy-5'-(methylthio)adenosine	CSC[C@@H]1[C@H]([C@H]([C@@H](O1)N1C=NC=2C(N)=NC=NC12)O)O	WUUGFSXJNOTRMR-IOSLPCCCSA-N	Nucleosides, nucleotides, and analogues	5'-deoxyribonucleosides	5'-deoxy-5'-thionucleosides
5'-Deoxyadenosine	[C@@H]1([C@H](O)[C@H](O)[C@@H](C)O1)N1C=NC=2C(N)=NC=NC12	XGYIMTFOTBMPFP-KQYNXXCUSA-N	Nucleosides, nucleotides, and analogues	5'-deoxyribonucleosides	Unassigned
5,6-Dihydro-5-methyluracil	CC1C(NC(NC1)=O)=O	NBAKTGXDIBVZOO-UHFFFAOYSA-N	Organoheterocyclic compounds	Diazines	Pyrimidines and pyrimidine derivatives
5-Methylcytosine	CC=1C(=NC(NC1)=O)N	LRSASMSXMSNRBT-UHFFFAOYSA-N	Organoheterocyclic compounds	Diazines	Pyrimidines and pyrimidine derivatives
5-Ribofuranosylnicotinamide	C1([C@H](O)[C@H](O)[C@H](O1)CO)C=1C=NC=C(C(=O)N)C1	UBWZUUUKBOMAPO-PBVVMKELSA-N	Organic oxygen compounds	Organooxygen compounds	Carbohydrates and carbohydrate conjugates
6-Chloropurine	ClC1=C2NC=NC2=NC=N1	ZKBQDFAWXLTYKS-UHFFFAOYSA-N	Organoheterocyclic compounds	Imidazopyrimidines	Purines and purine derivatives
6-Methylmercaptopurine	CSC1=C2NC=NC2=NC=N1	UIJIQXGRFSPYQW-UHFFFAOYSA-N	Organoheterocyclic compounds	Imidazopyrimidines	Purines and purine derivatives
7-Methylguanine	CN1C=NC=2N=C(NC(C12)=O)N	FZWGECJQACGGTI-UHFFFAOYSA-N	Organoheterocyclic compounds	Imidazopyrimidines	Purines and purine derivatives
7-Methylxanthine	CN1C=NC=2NC(NC(C12)=O)=O	PFWLFWPASULGAN-UHFFFAOYSA-N	Organoheterocyclic compounds	Imidazopyrimidines	Purines and purine derivatives
8-Azaguanine	N1C(N)=NC=2N=NNC2C1=O	LPXQRXLUHJKZIE-UHFFFAOYSA-N	Organoheterocyclic compounds	Triazolopyrimidines	Unassigned
Glucosyl%202-Hydroxy-4-Methylpentanoic%20Acid	C1([C@H](O)[C@@H](O)[C@H](O)[C@H](O1)CO)C(C(=O)O)(CC(C)C)O	KQNYJYVRJFLLJF-VDGOWDGBSA-N	Lipids and lipid-like molecules	Fatty Acyls	Fatty acids and conjugates
9-Alpha-Ribofuranosyladenine	[C@H]1([C@H](O)[C@H](O)[C@H](O1)CO)N1C2=NC=NC(=C2N=C1)N	OIRDTQYFTABQOQ-CRKDRTNXSA-N	Nucleosides, nucleotides, and analogues	Purine nucleosides	Unassigned
9-Arabinosyladenine	C1([C@@H](O)[C@H](O)[C@H](O)CO1)N1C2=NC=NC(=C2N=C1)N	PIYAXTGSPRHBFB-KBNQYOMWSA-N	Organic oxygen compounds	Organooxygen compounds	Carbohydrates and carbohydrate conjugates
Adenine	N1=CN=C2N=CNC2=C1N	GFFGJBXGBJISGV-UHFFFAOYSA-N	Organoheterocyclic compounds	Imidazopyrimidines	Purines and purine derivatives
Adenosine%205'-monophosphate	P(=O)(O)(O)OC[C@@H]1[C@H]([C@H]([C@@H](O1)N1C=NC=2C(N)=NC=NC12)O)O	UDMBCSSLTHHNCD-KQYNXXCUSA-N	Nucleosides, nucleotides, and analogues	Purine nucleotides	Purine ribonucleotides
Adenosine	[C@@H]1([C@H](O)[C@H](O)[C@@H](CO)O1)N1C=NC=2C(N)=NC=NC12	OIRDTQYFTABQOQ-KQYNXXCUSA-N	Nucleosides, nucleotides, and analogues	Purine nucleosides	Unassigned
Cytidine	[C@@H]1([C@H](O)[C@H](O)[C@@H](CO)O1)N1C(=O)N=C(N)C=C1	UHDGCWIWMRVCDJ-XVFCMESISA-N	Nucleosides, nucleotides, and analogues	Pyrimidine nucleosides	Unassigned
Cytosine	N1C(=O)N=C(N)C=C1	OPTASPLRGRRNAP-UHFFFAOYSA-N	Organoheterocyclic compounds	Diazines	Pyrimidines and pyrimidine derivatives
Guanine	N1C(N)=NC=2N=CNC2C1=O	UYTPUPDQBNUYGX-UHFFFAOYSA-N	Organoheterocyclic compounds	Imidazopyrimidines	Purines and purine derivatives
Guanosine	[C@@H]1([C@H](O)[C@H](O)[C@@H](CO)O1)N1C=NC=2C(=O)NC(N)=NC12	NYHBQMYGNKIUIF-UUOKFMHZSA-N	Nucleosides, nucleotides, and analogues	Purine nucleosides	Unassigned
Guanosine%205'-monophosphate	P(=O)(O)(O)OC[C@@H]1[C@H]([C@H]([C@@H](O1)N1C=NC=2C(=O)NC(N)=NC12)O)O	RQFCJASXJCIDSX-UUOKFMHZSA-N	Nucleosides, nucleotides, and analogues	Purine nucleotides	Purine ribonucleotides
Hypoxanthine	N1C=NC=2N=CNC2C1=O	FDGQSTZJBFJUBT-UHFFFAOYSA-N	Organoheterocyclic compounds	Imidazopyrimidines	Purines and purine derivatives
Inosine	[C@@H]1([C@H](O)[C@H](O)[C@@H](CO)O1)N1C=NC=2C(O)=NC=NC12	UGQMRVRMYYASKQ-KQYNXXCUSA-N	Nucleosides, nucleotides, and analogues	Purine nucleosides	Unassigned
Inosine%205'-monophosphate	P(=O)(O)(O)OC[C@@H]1[C@H]([C@H]([C@@H](O1)N1C=NC=2C(O)=NC=NC12)O)O	GRSZFWQUAKGDAV-KQYNXXCUSA-N	Nucleosides, nucleotides, and analogues	Purine nucleotides	Purine ribonucleotides
Isocytosine	N1=C(N)NC(=O)C=C1	XQCZBXHVTFVIFE-UHFFFAOYSA-N	Organoheterocyclic compounds	Diazines	Pyrimidines and pyrimidine derivatives
Isoguanine	N1C(=O)N=C2N=CNC2=C1N	DRAVOWXCEBXPTN-UHFFFAOYSA-N	Organoheterocyclic compounds	Imidazopyrimidines	Purines and purine derivatives
N6-(2-Hydroxyethyl)adenosine	OCCNC=1C=2N=CN([C@H]3[C@H](O)[C@H](O)[C@@H](CO)O3)C2N=CN1	BBOCDRLDMQHWJP-WOUKDFQISA-N	Nucleosides, nucleotides, and analogues	Purine nucleosides	Unassigned
N6-Isopentenyladenine	C(CC(=C)C)NC1=C2NC=NC2=NC=N1	BPRQFDNBWVMLPS-UHFFFAOYSA-N	Organoheterocyclic compounds	Imidazopyrimidines	Purines and purine derivatives
N6-Threonylcarbamoyladenosine	N[C@@H]([C@H](O)C)C(=O)NC(=O)NC=1C=2N=CN([C@H]3[C@H](O)[C@H](O)[C@@H](CO)O3)C2N=CN1	OPPXXSJNEJKHJA-CKTDUXNWSA-N	Nucleosides, nucleotides, and analogues	Purine nucleosides	Unassigned
N6-methyladenosine	CNC=1C=2N=CN([C@H]3[C@H](O)[C@H](O)[C@@H](CO)O3)C2N=CN1	VQAYFKKCNSOZKM-IOSLPCCCSA-N	Nucleosides, nucleotides, and analogues	Purine nucleosides	Unassigned
N7-Methylguanosine	C[N+]1=CN([C@H]2[C@H](O)[C@H](O)[C@@H](CO)O2)C=2N=C(NC(C12)=O)N	OGHAROSJZRTIOK-KQYNXXCUSA-O	Nucleosides, nucleotides, and analogues	Purine nucleosides	Unassigned
Ribosyladenosine	C1([C@H](O)[C@H](O)[C@H](O1)CO)[C@@]1([C@H](O)[C@H](O)[C@@H](CO)O1)N1C=NC=2C(N)=NC=NC12	BDPULNJEMMNNMI-BFJMCJFZSA-N	Nucleosides, nucleotides, and analogues	Purine nucleosides	Unassigned
Thymidine	[C@@H]1(C[C@H](O)[C@@H](CO)O1)N1C(=O)NC(=O)C(C)=C1	IQFYYKKMVGJFEH-XLPZGREQSA-N	Nucleosides, nucleotides, and analogues	Pyrimidine nucleosides	Pyrimidine 2'-deoxyribonucleosides
Thymine	N1C(=O)NC(=O)C(C)=C1	RWQNBRDOKXIBIV-UHFFFAOYSA-N	Organoheterocyclic compounds	Diazines	Pyrimidines and pyrimidine derivatives
Uracil	N1C(=O)NC(=O)C=C1	ISAKRJDGNUQOIC-UHFFFAOYSA-N	Organoheterocyclic compounds	Diazines	Pyrimidines and pyrimidine derivatives
Uridine	[C@@H]1([C@H](O)[C@H](O)[C@@H](CO)O1)N1C(=O)NC(=O)C=C1	DRTQHJPVMGBUCF-XVFCMESISA-N	Nucleosides, nucleotides, and analogues	Pyrimidine nucleosides	Unassigned
Uridine%205'-diphosphate	P(O)(=O)(OP(=O)(O)O)OC[C@@H]1[C@H]([C@H]([C@@H](O1)N1C(=O)NC(=O)C=C1)O)O	XCCTYIAWTASOJW-XVFCMESISA-N	Nucleosides, nucleotides, and analogues	Pyrimidine nucleotides	Pyrimidine ribonucleotides
Uridine%205'-monophosphate	P(=O)(O)(O)OC[C@@H]1[C@H]([C@H]([C@@H](O1)N1C(=O)NC(=O)C=C1)O)O	DJJCXFVJDGTHFX-XVFCMESISA-N	Nucleosides, nucleotides, and analogues	Pyrimidine nucleotides	Pyrimidine ribonucleotides
Xanthine	N1C(=O)NC=2N=CNC2C1=O	LRFVTYWOQMYALW-UHFFFAOYSA-N	Organoheterocyclic compounds	Imidazopyrimidines	Purines and purine derivatives
Xanthosine	[C@@H]1([C@H](O)[C@H](O)[C@@H](CO)O1)N1C=NC=2C(=O)NC(=O)NC12	UBORTCNDUKBEOP-UUOKFMHZSA-N	Nucleosides, nucleotides, and analogues	Purine nucleosides	Unassigned
1,3,7-Trimethyluric%20acid	CN1C(=O)N(C=2NC(=O)N(C2C1=O)C)C	BYXCFUMGEBZDDI-UHFFFAOYSA-N	Organoheterocyclic compounds	Imidazopyrimidines	Purines and purine derivatives
1-Methylpiperidine-2-carboxylic%20acid	CN1C(CCCC1)C(=O)O	BPSLZWSRHTULGU-UHFFFAOYSA-N	Organic acids and derivatives	Carboxylic acids and derivatives	Amino acids, peptides, and analogues
2,2'-(3-methylcyclohexane-1,1-diyl)diacetic%20acid	CC1CC(CCC1)(CC(=O)O)CC(=O)O	HJPDHTDUPWGUHP-UHFFFAOYSA-N	Organic acids and derivatives	Carboxylic acids and derivatives	Dicarboxylic acids and derivatives
2,2-Dimethylsuccinic%20acid	CC(C(=O)O)(CC(=O)O)C	GOHPTLYPQCTZSE-UHFFFAOYSA-N	Lipids and lipid-like molecules	Fatty Acyls	Fatty acids and conjugates
2-(acetyloxy)-5-ethyl-2,3-dimethylhexanedioicacid	C(C)(=O)OC(C(=O)O)(C(CC(C(=O)O)CC)C)C	ZRDBLIIFMVOPDX-UHFFFAOYSA-N	Organic acids and derivatives	Carboxylic acids and derivatives	Tricarboxylic acids and derivatives
2-Aminoethanesulfonic%20acid	NCCS(=O)(=O)O	XOAAWQZATWQOTB-UHFFFAOYSA-N	Organic acids and derivatives	Organic sulfonic acids and derivatives	Organosulfonic acids and derivatives
2-Aminoisobutyric%20acid	NC(C(=O)O)(C)C	FUOOLUPWFVMBKG-UHFFFAOYSA-N	Organic acids and derivatives	Carboxylic acids and derivatives	Amino acids, peptides, and analogues
2-Hydroxy-2-methyl-3-oxobutanoic%20acid	OC(C(=O)O)(C(C)=O)C	NMDWGEGFJUBKLB-UHFFFAOYSA-N	Organic acids and derivatives	Keto acids and derivatives	Short-chain keto acids and derivatives
2-Hydroxy-4-methylpentanoic%20acid	OC(C(=O)O)CC(C)C	LVRFTAZAXQPQHI-UHFFFAOYSA-N	Lipids and lipid-like molecules	Fatty Acyls	Fatty acids and conjugates
2-Hydroxyethylphosphonic%20acid	OCCP(O)(O)=O	SEHJHHHUIGULEI-UHFFFAOYSA-N	Organic acids and derivatives	Organic phosphonic acids and derivatives	Organic phosphonic acids
2-Hydroxyglutaric%20Acid	OC(C(=O)O)CCC(=O)O	HWXBTNAVRSUOJR-UHFFFAOYSA-N	Organic acids and derivatives	Hydroxy acids and derivatives	Short-chain hydroxy acids and derivatives
2-Hydroxyisocaproic%20acid	OC(C(=O)O)CC(C)C	LVRFTAZAXQPQHI-UHFFFAOYSA-N	Lipids and lipid-like molecules	Fatty Acyls	Fatty acids and conjugates
2-Isopropylmalic%20Acid	C(C)(C)C(C(=O)O)(O)CC(=O)O	BITYXLXUCSKTJS-UHFFFAOYSA-N	Lipids and lipid-like molecules	Fatty Acyls	Fatty acids and conjugates
2-Methyl-3-oxoadipic%20acid	CC(C(=O)O)C(CCC(=O)O)=O	DBHGTJWNUJZZOA-UHFFFAOYSA-N	Organic acids and derivatives	Keto acids and derivatives	Medium-chain keto acids and derivatives
2-Methylene-3-(6-hydroxyhexyl)-butanedioic%20acid	C=C(C(=O)O)C(C(=O)O)CCCCCCO	DHVXMTMJTVCPBB-UHFFFAOYSA-N	Organic acids and derivatives	Hydroxy acids and derivatives	Medium-chain hydroxy acids and derivatives
2-Methylglutaric%20acid	CC(C(=O)O)CCC(=O)O	AQYCMVICBNBXNA-UHFFFAOYSA-N	Lipids and lipid-like molecules	Fatty Acyls	Fatty acids and conjugates
2-Methylsuccinic%20acid	CC(C(=O)O)CC(=O)O	WXUAQHNMJWJLTG-UHFFFAOYSA-N	Lipids and lipid-like molecules	Fatty Acyls	Fatty acids and conjugates
2-Propylglutaric%20acid	C(CC)C(C(=O)O)CCC(=O)O	IFNXFIJXYVEYLF-UHFFFAOYSA-N	Lipids and lipid-like molecules	Fatty Acyls	Fatty acids and conjugates
2-Propylmalic%20Acid	C(CC)C(C(=O)O)(O)CC(=O)O	KLURIVUFKOVPER-UHFFFAOYSA-N	Organic acids and derivatives	Hydroxy acids and derivatives	Medium-chain hydroxy acids and derivatives
2-Propylsuccinic%20acid	C(CC)C(C(=O)O)CC(=O)O	QLTZBYGZXPKHLF-UHFFFAOYSA-N	Lipids and lipid-like molecules	Fatty Acyls	Fatty acids and conjugates
3-Furoic%20acid	O1C=C(C=C1)C(=O)O	IHCCAYCGZOLTEU-UHFFFAOYSA-N	Organoheterocyclic compounds	Furans	Furoic acid and derivatives
3-Guanidinopropionic%20acid	N(C(=N)N)CCC(=O)O	KMXXSJLYVJEBHI-UHFFFAOYSA-N	Organic nitrogen compounds	Organonitrogen compounds	Guanidines
3-Hydroxy-3-methylpentane-1,5-dioic%20acid	OC(CC(=O)O)(CC(=O)O)C	NPOAOTPXWNWTSH-UHFFFAOYSA-N	Lipids and lipid-like molecules	Fatty Acyls	Fatty acids and conjugates
3-Methyl-2-Oxobutanoic%20acid	CC(C(C(=O)O)=O)C	QHKABHOOEWYVLI-UHFFFAOYSA-N	Organic acids and derivatives	Keto acids and derivatives	Short-chain keto acids and derivatives
3-Methylmalic%20acid	CC(C(C(=O)O)O)C(=O)O	NPYQJIHHTGFBLN-UHFFFAOYSA-N	Lipids and lipid-like molecules	Fatty Acyls	Fatty acids and conjugates
4-Acetamidobutyric%20acid	C(C)(=O)NCCCC(=O)O	UZTFMUBKZQVKLK-UHFFFAOYSA-N	Organic acids and derivatives	Carboxylic acids and derivatives	Amino acids, peptides, and analogues
4-Guanidinobutyric%20acid	N(C(=N)N)CCCC(=O)O	TUHVEAJXIMEOSA-UHFFFAOYSA-N	Organic acids and derivatives	Carboxylic acids and derivatives	Amino acids, peptides, and analogues
4-Hydroxy-2-Oxopentanoic%20Acid	OC(CC(C(=O)O)=O)C	HFKQINMYQUXOCH-UHFFFAOYSA-N	Organic acids and derivatives	Keto acids and derivatives	Short-chain keto acids and derivatives
4-Hydroxy-2-oxoglutaric%20acid	OC(CC(C(=O)O)=O)C(=O)O	WXSKVKPSMAHCSG-UHFFFAOYSA-N	Organic acids and derivatives	Keto acids and derivatives	Gamma-keto acids and derivatives
4-Hydroxycyclohexylcarboxylic%20acid	OC1CCC(CC1)C(=O)O	HCFRWBBJISAZNK-UHFFFAOYSA-N	Organic oxygen compounds	Organooxygen compounds	Alcohols and polyols
5-Acetamidopentanoic%20Acid	C(C)(=O)NCCCCC(=O)O	TZZSWAXSIGWXOS-UHFFFAOYSA-N	Lipids and lipid-like molecules	Fatty Acyls	Fatty acids and conjugates
5-Aminovaleric%20acid	NCCCCC(=O)O	JJMDCOVWQOJGCB-UHFFFAOYSA-N	Organic acids and derivatives	Carboxylic acids and derivatives	Amino acids, peptides, and analogues
6-Acetamidohexanoic%20acid	C(C)(=O)NCCCCCC(=O)O	WDSCBUNMANHPFH-UHFFFAOYSA-N	Lipids and lipid-like molecules	Fatty Acyls	Fatty acids and conjugates
6-Aminocaproic%20acid	NCCCCCC(=O)O	SLXKOJJOQWFEFD-UHFFFAOYSA-N	Lipids and lipid-like molecules	Fatty Acyls	Fatty acids and conjugates
Adipic%20Acid	C(CCCCC(=O)O)(=O)O	WNLRTRBMVRJNCN-UHFFFAOYSA-N	Lipids and lipid-like molecules	Fatty Acyls	Fatty acids and conjugates
Citric%20Acid	C(CC(O)(C(=O)O)CC(=O)O)(=O)O	KRKNYBCHXYNGOX-UHFFFAOYSA-N	Organic acids and derivatives	Carboxylic acids and derivatives	Tricarboxylic acids and derivatives
D-Malic%20acid	C([C@H](O)CC(=O)O)(=O)O	BJEPYKJPYRNKOW-UWTATZPHSA-N	Organic acids and derivatives	Hydroxy acids and derivatives	Beta hydroxy acids and derivatives
Diethyl%20malonate	C(CC(=O)OCC)(=O)OCC	IYXGSMUGOJNHAZ-UHFFFAOYSA-N	Organic acids and derivatives	Carboxylic acids and derivatives	Dicarboxylic acids and derivatives
Dimethylmalonic%20acid	CC(C(=O)O)(C(=O)O)C	OREAFAJWWJHCOT-UHFFFAOYSA-N	Organic acids and derivatives	Carboxylic acids and derivatives	Dicarboxylic acids and derivatives
Ethyl%203-hydroxybutyrate	OC(CC(=O)OCC)C	OMSUIQOIVADKIM-UHFFFAOYSA-N	Organic acids and derivatives	Hydroxy acids and derivatives	Beta hydroxy acids and derivatives
Ethylmalonic%20acid	C(C)C(C(=O)O)C(=O)O	UKFXDFUAPNAMPJ-UHFFFAOYSA-N	Lipids and lipid-like molecules	Fatty Acyls	Fatty acids and conjugates
Fumaric%20acid	C(\C=C\C(=O)O)(=O)O	VZCYOOQTPOCHFL-OWOJBTEDSA-N	Organic acids and derivatives	Carboxylic acids and derivatives	Dicarboxylic acids and derivatives
Glucosyl%206,9-dihydroxydec-4-enoic%20acid	C1([C@H](O)[C@@H](O)[C@H](O)[C@H](O1)CO)C(C(=O)O)CC=CC(CCC(C)O)O	LIYMBRWNAGTBHG-SGYZAUPESA-N	Lipids and lipid-like molecules	Fatty Acyls	Fatty alcohols
Glutaric%20acid	C(CCCC(=O)O)(=O)O	JFCQEDHGNNZCLN-UHFFFAOYSA-N	Organic acids and derivatives	Carboxylic acids and derivatives	Dicarboxylic acids and derivatives
Hexylitaconic%20acid	C(CCCCC)C=C(C(=O)O)CC(=O)O	UIOKWKMSXOTETD-UHFFFAOYSA-N	Lipids and lipid-like molecules	Fatty Acyls	Fatty acids and conjugates
Hydroxypyruvic%20acid	OCC(C(=O)O)=O	HHDDCCUIIUWNGJ-UHFFFAOYSA-N	Organic acids and derivatives	Hydroxy acids and derivatives	Beta hydroxy acids and derivatives
Isocitric%20Acid	C(C(O)C(C(=O)O)CC(=O)O)(=O)O	ODBLHEXUDAPZAU-UHFFFAOYSA-N	Organic acids and derivatives	Carboxylic acids and derivatives	Tricarboxylic acids and derivatives
Itaconic%20acid	C(C(=C)CC(=O)O)(=O)O	LVHBHZANLOWSRM-UHFFFAOYSA-N	Lipids and lipid-like molecules	Fatty Acyls	Fatty acids and conjugates
L-Malic%20acid	C([C@@H](O)CC(=O)O)(=O)O	BJEPYKJPYRNKOW-REOHCLBHSA-N	Organic acids and derivatives	Hydroxy acids and derivatives	Beta hydroxy acids and derivatives
Malonic%20acid	C(CC(=O)O)(=O)O	OFOBLEOULBTSOW-UHFFFAOYSA-N	Organic acids and derivatives	Carboxylic acids and derivatives	Dicarboxylic acids and derivatives
Mandelic%20acid-?-glucoside
Methylmalonic%20acid	CC(C(=O)O)C(=O)O	ZIYVHBGGAOATLY-UHFFFAOYSA-N	Organic acids and derivatives	Carboxylic acids and derivatives	Dicarboxylic acids and derivatives
Mevalonic%20acid	C(C[C@@](O)(C)CCO)(=O)O	KJTLQQUUPVSXIM-ZCFIWIBFSA-N	Lipids and lipid-like molecules	Fatty Acyls	Fatty acids and conjugates
Muconic%20acid	C(\C=C\C=C\C(=O)O)(=O)O	TXXHDPDFNKHHGW-ZPUQHVIOSA-N	Lipids and lipid-like molecules	Fatty Acyls	Fatty acids and conjugates
Oxalic%20acid	C(C(=O)O)(=O)O	MUBZPKHOEPUJKR-UHFFFAOYSA-N	Organic acids and derivatives	Carboxylic acids and derivatives	Dicarboxylic acids and derivatives
Piperonylic%20acid	C(C1=CC=2OCOC2C=C1)(=O)O	VDVJGIYXDVPQLP-UHFFFAOYSA-N	Organoheterocyclic compounds	Benzodioxoles	Unassigned
Sebacic%20acid	C(CCCCCCCCC(=O)O)(=O)O	CXMXRPHRNRROMY-UHFFFAOYSA-N	Lipids and lipid-like molecules	Fatty Acyls	Fatty acids and conjugates
Succinic%20acid	C(CCC(=O)O)(=O)O	KDYFGRWQOYBRFD-UHFFFAOYSA-N	Organic acids and derivatives	Carboxylic acids and derivatives	Dicarboxylic acids and derivatives
1-(4-Methoxyphenyl)-1-propanol	COC1=CC=C(C=C1)C(CC)O	RELLLNVFFUWXHI-UHFFFAOYSA-N	Benzenoids	Benzene and substituted derivatives	Phenylpropanes
1-Decanol	C(CCCCCCCCC)O	MWKFXSUHUHTGQN-UHFFFAOYSA-N	Lipids and lipid-like molecules	Fatty Acyls	Fatty alcohols
2-Decanol	CC(CCCCCCCC)O	ACUZDYFTRHEKOS-UHFFFAOYSA-N	Lipids and lipid-like molecules	Fatty Acyls	Fatty alcohols
3,4-methylenedioxy%20cinnamyl%20alcohol	C1OC=2C=C(C=CCO)C=CC2O1	JQZASRHQYJJUCE-UHFFFAOYSA-N	Organoheterocyclic compounds	Benzodioxoles	Unassigned
N-Glucosylpicolinate	C1([C@H](O)[C@@H](O)[C@H](O)[C@H](O1)CO)N1C(C=CC=C1)C(=O)[O-]	GCQPKXSDTRKIRF-LSDHNKLTSA-M	Organic acids and derivatives	Carboxylic acids and derivatives	Amino acids, peptides, and analogues
Citronellol	CC(C)=CCCC(C)CCO	QMVPMAAFGQKVCJ-UHFFFAOYSA-N	Lipids and lipid-like molecules	Prenol lipids	Monoterpenoids
D-Panthenol	OCCCNC([C@@H](O)C(C)(C)CO)=O	SNPLKNRPJHDVJA-SSDOTTSWSA-N	Lipids and lipid-like molecules	Fatty Acyls	Fatty amides
Methyl%20Alpha-D-Galactopyranoside	O([C@@H]1[C@H](O)[C@@H](O)[C@@H](O)[C@H](O1)CO)C	HOVAGTYPODGVJG-PZRMXXKTSA-N	Organic oxygen compounds	Organooxygen compounds	Carbohydrates and carbohydrate conjugates
2,6-Dimethoxybenzaldehyde	COC1=C(C=O)C(=CC=C1)OC	WXSGQHKHUYTJNB-UHFFFAOYSA-N	Benzenoids	Benzene and substituted derivatives	Methoxybenzenes
2-Methoxy-1-benzofuran-5-carbaldehyde	COC=1OC2=C(C1)C=C(C=C2)C=O	AOBPPVSKOQIAKW-UHFFFAOYSA-N	Organoheterocyclic compounds	Benzofurans	Unassigned
2-Pentyl-3-phenyl-2-propenal	C(CCCC)C(C=O)=CC1=CC=CC=C1	HMKKIXGYKWDQSV-UHFFFAOYSA-N	Phenylpropanoids and polyketides	Cinnamaldehydes	Unassigned
3,4-Methylenedioxycinnamaldehyde	C1OC=2C=C(C=CC=O)C=CC2O1	HZUFMSJUNLSDSZ-UHFFFAOYSA-N	Organoheterocyclic compounds	Benzodioxoles	Unassigned
4-Hydroxybenzaldehyde	OC1=CC=C(C=O)C=C1	RGHHSNMVTDWUBI-UHFFFAOYSA-N	Organic oxygen compounds	Organooxygen compounds	Carbonyl compounds
4-MethoxycinnaMaldehyde	COC1=CC=C(C=CC=O)C=C1	AXCXHFKZHDEKTP-UHFFFAOYSA-N	Phenylpropanoids and polyketides	Cinnamaldehydes	Unassigned
4-hydroxyphenyl%20acrylaldehyde	OC1=CC=C(C=C1)C(C=O)=C	CJEQHXGMZPFAQE-UHFFFAOYSA-N	Benzenoids	Benzene and substituted derivatives	Phenylacetaldehydes
5-Methoxyfurfural	COC1=CC=C(C=O)O1	RJGBSYZFOCAGQY-UHFFFAOYSA-N	Organic oxygen compounds	Organooxygen compounds	Ethers
9,11,13,15-Octadecatetraenal	C(CCCCCCCC=CC=CC=CC=CCC)=O	RETRRXAPSLSKSS-UHFFFAOYSA-N	Lipids and lipid-like molecules	Fatty Acyls	Fatty aldehydes
Benzaldehyde	C(C1=CC=CC=C1)=O	HUMNYLRZRPPJDN-UHFFFAOYSA-N	Benzenoids	Benzene and substituted derivatives	Benzoyl derivatives
Coniferaldehyde	C(\C=C\C1=CC(OC)=C(O)C=C1)=O	DKZBBWMURDFHNE-NSCUHMNNSA-N	Benzenoids	Phenols	Methoxyphenols
Isovanillin	O=CC1=CC(O)=C(OC)C=C1	JVTZFYYHCGSXJV-UHFFFAOYSA-N	Benzenoids	Phenols	Methoxyphenols
Protocatechualdehyde	C(C1=CC(O)=C(O)C=C1)=O	IBGBGRVKPALMCQ-UHFFFAOYSA-N	Organic oxygen compounds	Organooxygen compounds	Carbonyl compounds
Syringaldehyde;%204-Hydroxy-3,5-Dimethoxybenzaldehyde	OC1=C(C=C(C=O)C=C1OC)OC.C(C1=CC(OC)=C(O)C(OC)=C1)=O	UVTBCPDVOGETMJ-UHFFFAOYSA-N	Benzenoids	Phenols	Methoxyphenols
Vanillin;%204-Hydroxy-3-Methoxybenzaldehyde	OC1=C(C=C(C=O)C=C1)OC.O=CC1=CC(OC)=C(O)C=C1	BMVMVZLMDBIPJP-UHFFFAOYSA-N	Benzenoids	Phenols	Methoxyphenols
3,7-Dihydroxychromen-4-one	OC1=COC2=CC(=CC=C2C1=O)O	ZZYLCDXPJISRAD-UHFFFAOYSA-N	Organoheterocyclic compounds	Benzopyrans	1-benzopyrans
5,7-Dihydroxychromone	OC1=C2C(C=COC2=CC(=C1)O)=O	NYCXYKOXLNBYID-UHFFFAOYSA-N	Organoheterocyclic compounds	Benzopyrans	1-benzopyrans
7-Hydroxy-4-chromone	OC1=CC=C2C(C=COC2=C1)=O	WVJCRTSTRGRJJT-UHFFFAOYSA-N	Organoheterocyclic compounds	Benzopyrans	1-benzopyrans
1-Indanone	C1(CCC2=CC=CC=C12)=O	QNXSIUBBGPHDDE-UHFFFAOYSA-N	Benzenoids	Indanes	Indanones
2',4',6'-Trihydroxyacetophenone	OC1=C(C(=CC(=C1)O)O)C(C)=O	XLEYFDVVXLMULC-UHFFFAOYSA-N	Organic oxygen compounds	Organooxygen compounds	Carbonyl compounds
2',4'-Dimethylacetophenone	CC1=C(C=CC(=C1)C)C(C)=O	HSDSKVWQTONQBJ-UHFFFAOYSA-N	Organic oxygen compounds	Organooxygen compounds	Carbonyl compounds
2-Pentadecanone	CC(CCCCCCCCCCCCC)=O	CJPNOLIZCWDHJK-UHFFFAOYSA-N	Organic oxygen compounds	Organooxygen compounds	Carbonyl compounds
2-Undecanone	CC(CCCCCCCCC)=O	KYWIYKKSMDLRDC-UHFFFAOYSA-N	Organic oxygen compounds	Organooxygen compounds	Carbonyl compounds
5-Hydroxy-1-(4-hydroxy-3,5-dimethoxyphenyl)-7-(4-hydroxy-3-methoxyphenyl)heptan-3-one	OC(CC(CCC1=CC(=C(C(=C1)OC)O)OC)=O)CCC1=CC(=C(C=C1)O)OC	HTLHTPDGQJJQIR-UHFFFAOYSA-N	Phenylpropanoids and polyketides	Diarylheptanoids	Linear diarylheptanoids
5-Hydroxy-1-tetralone	OC1=C2CCCC(C2=CC=C1)=O	YPPZCRZRQHFRBH-UHFFFAOYSA-N	Benzenoids	Tetralins	Unassigned
5-Methoxy-1,7-diphenyl-3-heptanone	COC(CC(CCC1=CC=CC=C1)=O)CCC1=CC=CC=C1	PVYORFBABSDDNC-UHFFFAOYSA-N	Phenylpropanoids and polyketides	Diarylheptanoids	Linear diarylheptanoids
5-hydroxy-1-(3,4-Dihydroxyphenyl)-7-(4-hydroxy-3-methoxyphenyl)-3-heptanone	OC(CC(CCC1=CC(=C(C=C1)O)O)=O)CCC1=CC(=C(C=C1)O)OC	ZKZSLTBRRQHKHZ-UHFFFAOYSA-N	Phenylpropanoids and polyketides	Diarylheptanoids	Linear diarylheptanoids
9-Fluorenone	C1=CC=CC=2C3=CC=CC=C3C(C12)=O	YLQWCDOCJODRMT-UHFFFAOYSA-N	Benzenoids	Fluorenes	Unassigned
(R)-3-ethyl-7-hydroxy-6-methoxyphthalide	C(C)[C@H]1OC(=O)C2=C(C(=CC=C12)OC)O	CJPMLOYFDLJAKU-SSDOTTSWSA-N	Organoheterocyclic compounds	Benzofurans	Benzofuranones
(Z)-3-Ethylidene-7-hydroxy-6-methoxyphthalide	C(/C)=C\1/OC(=O)C2=C(C(=CC=C12)OC)O	YCVXJZRPLHJINO-CLTKARDFSA-N	Organoheterocyclic compounds	Isocoumarans	Isobenzofuranones
5-hydroxy-3,4-dimethyl-5-pentylfuran-2(5H)-one	OC1(C(=C(C(O1)=O)C)C)CCCCC	VJZWZDQDXPADSE-UHFFFAOYSA-N	Organoheterocyclic compounds	Dihydrofurans	Furanones
Butylphthalide	C(CCC)C1OC(=O)C2=CC=CC=C12	HJXMNVQARNZTEE-UHFFFAOYSA-N	Organoheterocyclic compounds	Benzofurans	Benzofuranones
1,8,15-triazacyclohenicosane-2,9,16-trione	N1C(CCCCCNC(CCCCCNC(CCCCC1)=O)=O)=O	HJBDVFFKADBHHV-UHFFFAOYSA-N	Phenylpropanoids and polyketides	Macrolactams	Unassigned
2(4H)-benzofuranone	O1C(C=C2C1=CC=CC2)=O	PWPSOYGLESTGEU-UHFFFAOYSA-N	Organoheterocyclic compounds	Dihydrofurans	Furanones
2,2-dimethylchromene-6-carboxylic%20acid	CC1(OC2=CC=C(C=C2C=C1)C(=O)O)C	AXICIBPYBONRSP-UHFFFAOYSA-N	Organoheterocyclic compounds	Benzopyrans	1-benzopyrans
2,4-Di-Tert-Butylphenol	C(C)(C)(C)C1=C(C=CC(=C1)C(C)(C)C)O	ICKWICRCANNIBI-UHFFFAOYSA-N	Benzenoids	Benzene and substituted derivatives	Phenylpropanes
2,4-Dinitrophenol	[N+](=O)([O-])C1=C(C=CC(=C1)[N+](=O)[O-])O	UFBJCMHMOXMLKC-UHFFFAOYSA-N	Benzenoids	Phenols	Nitrophenols
2,6-Di-tert-butyl-4-hydroxymethylphenol	C(C)(C)(C)C1=C(C(=CC(=C1)CO)C(C)(C)C)O	HNURKXXMYARGAY-UHFFFAOYSA-N	Benzenoids	Benzene and substituted derivatives	Phenylpropanes
2,7-Dihydroxy-1,6-dimethylpyrene	OC1=C(C2=CC=C3C=C(C(=C4C=CC(=C1)C2=C43)C)O)C	YVIRWYDEYOKIRX-UHFFFAOYSA-N	Benzenoids	Pyrenes	Unassigned
2-Dodecoxyethyl%20Hydrogen%20Sulfate	S(=O)(=O)(OCCOCCCCCCCCCCCC)O	QTDIEDOANJISNP-UHFFFAOYSA-N	Organic acids and derivatives	Organic sulfuric acids and derivatives	Sulfuric acid esters
2-Methoxy-4-ethenylphenol	COC1=C(C=CC(=C1)C=C)O	YOMSJEATGXXYPX-UHFFFAOYSA-N	Benzenoids	Phenols	Methoxyphenols
2-Methoxy-5-nitrophenol	COC1=C(C=C(C=C1)[N+](=O)[O-])O	KXKCTSZYNCDFFG-UHFFFAOYSA-N	Benzenoids	Benzene and substituted derivatives	Nitrobenzenes
3-(Cyclohexen-1-yl)-2-hydroxy-4a,5-dimethyl-2,3,4,5,6,7,8,8a-octahydronaphthalen-1-one	C1(=CCCCC1)C1C(C(C2CCCC(C2(C1)C)C)=O)O	UPPHZFOTRCUANC-UHFFFAOYSA-N	Lipids and lipid-like molecules	Prenol lipids	Sesquiterpenoids
3-Ethyl-7-hydroxyphthalide	C(C)C1OC(=O)C2=C(C=CC=C12)O	MHENVRWNXCCIFX-UHFFFAOYSA-N	Organoheterocyclic compounds	Benzofurans	Benzofuranones
3-Nitrophenol	[N+](=O)([O-])C=1C=C(C=CC1)O	RTZZCYNQPHTPPL-UHFFFAOYSA-N	Benzenoids	Phenols	Nitrophenols
4-Methyl-5-thiazoleethanol	CC=1N=CSC1CCO	BKAWJIRCKVUVED-UHFFFAOYSA-N	Organoheterocyclic compounds	Azoles	Thiazoles
N-Glucosylnicotinate	C1([C@H](O)[C@@H](O)[C@H](O)[C@H](O1)CO)N1CC(C(=O)[O-])=CC=C1	DDEDOKBHVJFYCO-YBTJCZCISA-M	Lipids and lipid-like molecules	Fatty Acyls	Fatty acids and conjugates
4-tert-Octylphenol	C(C)(C)(CC(C)(C)C)C1=CC=C(C=C1)O	ISAVYTVYFVQUDY-UHFFFAOYSA-N	Benzenoids	Benzene and substituted derivatives	Phenylpropanes
5,6,7,7a-tetrahydro-4,4,7a-trimethyl-2(4H)-benzofuranone	CC1(CCCC2(C1=CC(O2)=O)C)C	IMKHDCBNRDRUEB-UHFFFAOYSA-N	Organoheterocyclic compounds	Benzofurans	Unassigned
6,7-dimethyl-4-(2,3,4,5-tetrahydroxypentyl)-1H-quinoxaline-2,3-dione	CC=1C=C2N(C(C(NC2=CC1C)=O)=O)CC(C(C(CO)O)O)O	SLOQSNHEHSCLGS-UHFFFAOYSA-N	Organoheterocyclic compounds	Diazanaphthalenes	Benzodiazines
6-(1,2-dihydroxyethyl)-3-hydroxy-2,2,5,7-tetramethyl-3H-inden-1-one	OC(CO)C1=C(C=C2C(C(C(C2=C1C)=O)(C)C)O)C	SKHPCRTXXIZWSU-UHFFFAOYSA-N	Benzenoids	Indanes	Indanones
6-(sulfooxy)hexanoic%20acid	S(=O)(=O)(O)OCCCCCC(=O)O	IIWHJYUMSNCDTM-UHFFFAOYSA-N	Lipids and lipid-like molecules	Fatty Acyls	Fatty acids and conjugates
N-(4-O-(Glucosyl)-E-feruloyl)-tyramine	C1([C@H](O)[C@@H](O)[C@H](O)[C@H](O1)CO)OC1=C(C=C(/C=C/C(=O)NCCC2=CC=C(C=C2)O)C=C1)OC	JDPZMMGKJNMRBW-DFNOGTHYSA-N	Lipids and lipid-like molecules	Fatty Acyls	Fatty acyl glycosides
Benzyl%20?-primeveroside
Beta-asarone	C\C=C/C1=C(OC)C=C(OC)C(OC)=C1	RKFAZBXYICVSKP-WAYWQWQTSA-N	Benzenoids	Phenol ethers	Anisoles
Eriodictyol%20(5,7,3',4'-Tetrahydroxyflavanone)	C1[C@H](OC2=CC(=CC(=C2C1=O)O)O)C3=CC(=C(C=C3)O)O	SBHXYTNGIZCORC-ZDUSSCGKSA-N	Phenylpropanoids and polyketides	Flavonoids	Flavans
Dodecyl%20phosphate	P(=O)(OCCCCCCCCCCCC)([O-])[O-]	TVACALAUIQMRDF-UHFFFAOYSA-L	Organic acids and derivatives	Organic phosphoric acids and derivatives	Phosphate esters
Eugenyl%20formate	C(=O)OC1=C(OC)C=C(CC=C)C=C1	JUTKIGGQRLHTJN-UHFFFAOYSA-N	Benzenoids	Phenol ethers	Anisoles
Heptane-1,7-diol%20sulfate	S(=O)(=O)(O)OCCCCCCCO	UYQPZECXCTUBHS-UHFFFAOYSA-N	Organic acids and derivatives	Organic sulfuric acids and derivatives	Sulfuric acid esters
Hydroxystyrene	OC=CC1=CC=CC=C1	XLLXMBCBJGATSP-UHFFFAOYSA-N	Benzenoids	Benzene and substituted derivatives	Styrenes
Pinocembrin%20(Dihydrochrysin)	C1[C@H](OC2=CC(=CC(=C2C1=O)O)O)C3=CC=CC=C3	URFCJEUYXNAHFI-ZDUSSCGKSA-N	Phenylpropanoids and polyketides	Flavonoids	Flavans
Phenyl%20acetate	C(C)(=O)OC1=CC=CC=C1	IPBVNPXQWQGGJP-UHFFFAOYSA-N	Benzenoids	Phenol esters	Unassigned
Phloroglucinol	C1(O)=CC(O)=CC(O)=C1	QCDYQQDYXPDABM-UHFFFAOYSA-N	Benzenoids	Phenols	Benzenetriols and derivatives
Tributyl%20acetylcitrate	C(C)(=O)C(C(=O)OCCCC)C(O)(C(=O)OCCCC)CC(=O)OCCCC	PESZCXUNMKAYME-UHFFFAOYSA-N	Organic acids and derivatives	Carboxylic acids and derivatives	Tricarboxylic acids and derivatives
acetophenone	C(C)(=O)C1=CC=CC=C1	KWOLFJPFCHCOCG-UHFFFAOYSA-N	Organic oxygen compounds	Organooxygen compounds	Carbonyl compounds
1,3,4,5,6,7,8-heptahydroxyoctan-2-one	OCC(C(C(C(C(C(CO)O)O)O)O)O)=O	KSHYQYHHIKNYAY-UHFFFAOYSA-N	Organic oxygen compounds	Organooxygen compounds	Carbohydrates and carbohydrate conjugates
1,5-Anhydro-D-glucitol	C1[C@H](O)[C@@H](O)[C@H](O)[C@H](O1)CO	MPCAJMNYNOGXPB-SLPGGIOYSA-N	Organic oxygen compounds	Organooxygen compounds	Carbohydrates and carbohydrate conjugates
1,5-Anhydrofructose	C1C(=O)[C@@H](O)[C@H](O)[C@H](O1)CO	OCLOLUFOLJIQDC-HSUXUTPPSA-N	Organoheterocyclic compounds	Oxanes	Unassigned
2-Dehydro-3-deoxy-L-arabinonate	O=C(C(=O)C[C@@H](O)CO)[O-]	UQIGQRSJIKIPKZ-GSVOUGTGSA-M	Organic acids and derivatives	Keto acids and derivatives	Short-chain keto acids and derivatives
3-Dehydro-L-Threonic%20Acid	O=C([C@H](O)C(=O)CO)O	SCSGVVIUUUPOOJ-GSVOUGTGSA-N	Organic acids and derivatives	Keto acids and derivatives	Short-chain keto acids and derivatives
4-O-beta-L-Galactopyranosyl-3,6-anhydro-L-galactose	[C@H]1([C@@H](O)[C@H](O)[C@H](O)[C@@H](O1)CO)O[C@H]1[C@H]([C@@H](C=O)O)OC[C@@H]1O	JPLATTLXZFUKRQ-SGSFWAJCSA-N	Organic oxygen compounds	Organooxygen compounds	Carbohydrates and carbohydrate conjugates
4-O-galactopyranosylxylose	C1([C@H](O)[C@@H](O)[C@@H](O)[C@H](O1)CO)O[C@@H]([C@@H]([C@H](C=O)O)O)CO	BYZQBCIYLALLPA-DCTBAANUSA-N	Lipids and lipid-like molecules	Fatty Acyls	Fatty acyl glycosides
6-O-alpha-L-arabinopyranosyl-D-glucopyranose	[C@@H]1([C@H](O)[C@@H](O)[C@@H](O)CO1)OC[C@@H]1[C@H]([C@@H]([C@H](C(O)O1)O)O)O	QYNRIDLOTGRNML-ULAALWPKSA-N	Organic oxygen compounds	Organooxygen compounds	Carbohydrates and carbohydrate conjugates
Allitol	C([C@H](O)[C@H](O)[C@H](O)[C@H](O)CO)O	FBPFZTCFMRRESA-FBXFSONDSA-N	Organic oxygen compounds	Organooxygen compounds	Carbohydrates and carbohydrate conjugates
Butyl%20Beta-D-Fructopyranoside	OC[C@]1(OCCCC)[C@@H](O)[C@H](O)[C@H](O)CO1	NAJPAGUETSZHOG-DOLQZWNJSA-N	Organic oxygen compounds	Organooxygen compounds	Ethers
D-Erythrose-4-phosphate	P(=O)(O)(O)OC[C@H]([C@H](C=O)O)O	NGHMDNPXVRFFGS-IUYQGCFVSA-N	Organic oxygen compounds	Organooxygen compounds	Carbohydrates and carbohydrate conjugates
D-Fructose%206-Phosphate	P(=O)(O)(O)OC[C@H]([C@H]([C@@H](C(CO)=O)O)O)O	GSXOAOHZAIYLCY-HSUXUTPPSA-N	Organic oxygen compounds	Organooxygen compounds	Carbohydrates and carbohydrate conjugates
D-Fructose	OCC(=O)[C@@H](O)[C@H](O)[C@H](O)CO	BJHIKXHVCXFQLS-UYFOZJQFSA-N	Organic oxygen compounds	Organooxygen compounds	Carbohydrates and carbohydrate conjugates
D-Galactaric%20acid	O=C([C@H](O)[C@@H](O)[C@@H](O)[C@H](O)C(=O)O)O	DSLZVSRJTYRBFB-DUHBMQHGSA-N	Organic oxygen compounds	Organooxygen compounds	Carbohydrates and carbohydrate conjugates
D-Galactose	O=C[C@H](O)[C@@H](O)[C@@H](O)[C@H](O)CO	GZCGUPFRVQAUEE-KCDKBNATSA-N	Organic oxygen compounds	Organooxygen compounds	Carbohydrates and carbohydrate conjugates
D-Galacturonic%20acid	O=C[C@H](O)[C@@H](O)[C@@H](O)[C@H](O)C(=O)O	IAJILQKETJEXLJ-RSJOWCBRSA-N	Organic oxygen compounds	Organooxygen compounds	Carbohydrates and carbohydrate conjugates
D-Glucosamine%201-phosphate	P(=O)(O)(O)OC1[C@H](N)[C@@H](O)[C@H](O)[C@H](O1)CO	YMJBYRVFGYXULK-IVMDWMLBSA-N	Organic oxygen compounds	Organooxygen compounds	Carbohydrates and carbohydrate conjugates
D-Glucose%206-phosphate	P(=O)(O)(O)OC[C@H]([C@H]([C@@H]([C@H](C=O)O)O)O)O	VFRROHXSMXFLSN-SLPGGIOYSA-N	Organic oxygen compounds	Organooxygen compounds	Carbohydrates and carbohydrate conjugates
D-Glucose	O=C[C@H](O)[C@@H](O)[C@H](O)[C@H](O)CO	GZCGUPFRVQAUEE-SLPGGIOYSA-N	Organic oxygen compounds	Organooxygen compounds	Carbohydrates and carbohydrate conjugates
D-Glucurono-6,3-lactone	O=C[C@H](O)[C@@H]1[C@H](O)[C@H](O)C(=O)O1	UYUXSRADSPPKRZ-SKNVOMKLSA-N	Organoheterocyclic compounds	Lactones	Gamma butyrolactones
D-Lactose	OC1[C@H](O)[C@@H](O)[C@H](O[C@H]2[C@H](O)[C@@H](O)[C@@H](O)[C@H](O2)CO)[C@H](O1)CO	GUBGYTABKSRVRQ-QKKXKWKRSA-N	Organic oxygen compounds	Organooxygen compounds	Carbohydrates and carbohydrate conjugates
D-Mannitol	C([C@@H](O)[C@@H](O)[C@H](O)[C@H](O)CO)O	FBPFZTCFMRRESA-KVTDHHQDSA-N	Organic oxygen compounds	Organooxygen compounds	Carbohydrates and carbohydrate conjugates
D-Mannose	O=C[C@@H](O)[C@@H](O)[C@H](O)[C@H](O)CO	GZCGUPFRVQAUEE-KVTDHHQDSA-N	Organic oxygen compounds	Organooxygen compounds	Carbohydrates and carbohydrate conjugates
D-Saccharic%20acid	OC(=O)[C@H](O)[C@@H](O)[C@H](O)[C@H](O)C(=O)O	DSLZVSRJTYRBFB-LLEIAEIESA-N	Organic oxygen compounds	Organooxygen compounds	Carbohydrates and carbohydrate conjugates
D-Sorbitol	OC[C@H](O)[C@@H](O)[C@H](O)[C@H](O)CO	FBPFZTCFMRRESA-JGWLITMVSA-N	Organic oxygen compounds	Organooxygen compounds	Carbohydrates and carbohydrate conjugates
D-Threose	O=C[C@@H](O)[C@H](O)CO	YTBSYETUWUMLBZ-QWWZWVQMSA-N	Organic oxygen compounds	Organooxygen compounds	Carbohydrates and carbohydrate conjugates
D-Xylonic%20acid	O=C([C@H](O)[C@@H](O)[C@H](O)CO)O	QXKAIJAYHKCRRA-FLRLBIABSA-N	Organic oxygen compounds	Organooxygen compounds	Carbohydrates and carbohydrate conjugates
Digalactosylglycerol	C1([C@H](O)[C@@H](O)[C@@H](O)[C@H](O1)CO)C(C(C(O)C1[C@H](O)[C@@H](O)[C@@H](O)[C@H](O1)CO)O)O	JHORKUXMXSQYOS-SSGGBFIUSA-N	Organic oxygen compounds	Organooxygen compounds	Carbohydrates and carbohydrate conjugates
Gluconic%20acid	O=C([C@H](O)[C@@H](O)[C@H](O)[C@H](O)CO)O	RGHNJXZEOKUKBD-SQOUGZDYSA-N	Organic oxygen compounds	Organooxygen compounds	Carbohydrates and carbohydrate conjugates
L-Fucitol	C([C@@H](O)[C@H](O)[C@H](O)[C@@H](O)C)O	SKCKOFZKJLZSFA-KCDKBNATSA-N	Organic oxygen compounds	Organooxygen compounds	Carbohydrates and carbohydrate conjugates
L-Fucose	O=C[C@@H](O)[C@H](O)[C@H](O)[C@@H](O)C	PNNNRSAQSRJVSB-KCDKBNATSA-N	Organic oxygen compounds	Organooxygen compounds	Carbohydrates and carbohydrate conjugates
L-Glucose	O=C[C@@H](O)[C@H](O)[C@@H](O)[C@@H](O)CO	GZCGUPFRVQAUEE-VANKVMQKSA-N	Organic oxygen compounds	Organooxygen compounds	Carbohydrates and carbohydrate conjugates
N-Acetyl-D-galactosamine	C(C)(=O)N[C@H]1C(O)O[C@@H]([C@@H]([C@@H]1O)O)CO	OVRNDRQMDRJTHS-KEWYIRBNSA-N	Organic oxygen compounds	Organooxygen compounds	Carbohydrates and carbohydrate conjugates
N-Acetyl-D-mannosamine	C(C)(=O)N[C@@H]1C(O)O[C@@H]([C@H]([C@@H]1O)O)CO	OVRNDRQMDRJTHS-ZTVVOAFPSA-N	Organic oxygen compounds	Organooxygen compounds	Carbohydrates and carbohydrate conjugates
Rhamnose	O=C[C@H](O)[C@H](O)[C@@H](O)[C@@H](O)C	PNNNRSAQSRJVSB-BXKVDMCESA-N	Organic oxygen compounds	Organooxygen compounds	Carbohydrates and carbohydrate conjugates
Ribitol	C([C@H](O)[C@H](O)[C@H](O)CO)O	HEBKCHPVOIAQTA-ZXFHETKHSA-N	Organic oxygen compounds	Organooxygen compounds	Carbohydrates and carbohydrate conjugates
Rutinose	O[C@H]1[C@H](O)[C@@H](O)[C@H](O)[C@H](O1)CO[C@H]1[C@H](O)[C@H](O)[C@@H](O)[C@@H](O1)C	OVVGHDNPYGTYIT-BNXXONSGSA-N	Organic oxygen compounds	Organooxygen compounds	Carbohydrates and carbohydrate conjugates
Sorbitol-6-phosphate	P(=O)(O)(O)OC[C@H]([C@H]([C@@H]([C@H](CO)O)O)O)O	GACTWZZMVMUKNG-SLPGGIOYSA-N	Organic oxygen compounds	Organooxygen compounds	Carbohydrates and carbohydrate conjugates
Xylitol	C([C@H](O)[C@@H](O)[C@H](O)CO)O	HEBKCHPVOIAQTA-SCDXWVJYSA-N	Organic oxygen compounds	Organooxygen compounds	Carbohydrates and carbohydrate conjugates
sorbose	OCC(=O)[C@H](O)[C@@H](O)[C@H](O)CO	BJHIKXHVCXFQLS-PYWDMBMJSA-N	Organic oxygen compounds	Organooxygen compounds	Carbohydrates and carbohydrate conjugates
3',4-Dihydroxy-3,5'-dimethoxybibenzyl	OC=1C=C(CCC2=CC(=C(C=C2)O)OC)C=C(C1)OC	BMSPEISBKGSBTR-UHFFFAOYSA-N	Phenylpropanoids and polyketides	Stilbenes	Unassigned
4-Pyridoxic%20acid	N1=C(C)C(O)=C(C(=O)O)C(CO)=C1	HXACOUQIXZGNBF-UHFFFAOYSA-N	Organoheterocyclic compounds	Pyridines and derivatives	Pyridinecarboxylic acids and derivatives
Biotin	OC(=O)CCCC[C@@H]1SC[C@@H]2NC(=O)N[C@H]12	YBJHBAHKTGYVGT-ZKWXMUAHSA-N	Organoheterocyclic compounds	Biotin and derivatives	Unassigned
D-Pantothenic%20Acid	C(CCNC([C@@H](O)C(C)(C)CO)=O)(=O)O	GHOKWGTUZJEAQD-SSDOTTSWSA-N	Organic acids and derivatives	Carboxylic acids and derivatives	Amino acids, peptides, and analogues
Folic%20acid	C(CC[C@@H](C(=O)O)NC(=O)C1=CC=C(NCC2=CN=C3N=C(N)NC(=O)C3=N2)C=C1)(=O)O	OVBPIULPVIDEAO-LBPRGKRZSA-N	Organic acids and derivatives	Carboxylic acids and derivatives	Amino acids, peptides, and analogues
Isonicotinic%20acid	C(C1=CC=NC=C1)(=O)O	TWBYWOBDOCUKOW-UHFFFAOYSA-N	Organoheterocyclic compounds	Pyridines and derivatives	Pyridinecarboxylic acids and derivatives
Scutellarein%20(5,6,7,4'-Tetrahydroxyflavone)	C1=CC(=CC=C1C2=CC(=O)C3=C(O2)C=C(C(=C3O)O)O)O	JVXZRQGOGOXCEC-UHFFFAOYSA-N	Phenylpropanoids and polyketides	Flavonoids	Flavones
Nicotinamide	C(C1=CN=CC=C1)(=O)N	DFPAKSUCGFBDDF-UHFFFAOYSA-N	Organoheterocyclic compounds	Pyridines and derivatives	Pyridinecarboxylic acids and derivatives
Pyridoxal	N1=C(C)C(O)=C(C=O)C(CO)=C1	RADKZDMFGJYCBB-UHFFFAOYSA-N	Organoheterocyclic compounds	Pyridines and derivatives	Pyridine carboxaldehydes
Pyridoxal-5'-phosphate	P(=O)(O)(O)OCC=1C(=C(C(=NC1)C)O)C=O	NGVDGCNFYWLIFO-UHFFFAOYSA-N	Organoheterocyclic compounds	Pyridines and derivatives	Pyridine carboxaldehydes
Pyridoxine	N1=C(C)C(O)=C(CO)C(CO)=C1	LXNHXLLTXMVWPM-UHFFFAOYSA-N	Organoheterocyclic compounds	Pyridines and derivatives	Pyridoxines
Pyridoxine-5'-phosphate	P(=O)(O)(O)OCC=1C(=C(C(=NC1)C)O)CO	WHOMFKWHIQZTHY-UHFFFAOYSA-N	Organoheterocyclic compounds	Pyridines and derivatives	Pyridoxines
1,3-O-Di-p-Coumaroylglycerol	C(\C=C\C1=CC=C(C=C1)O)(=O)OCC(O)COC(\C=C\C1=CC=C(C=C1)O)=O	KBVRKOFXCCIDFX-YDWXAUTNSA-N	Phenylpropanoids and polyketides	Cinnamic acids and derivatives	Hydroxycinnamic acids and derivatives
o-Carboxy-5-hydroxytryptamine	C1=CC2=C(C=C1O)C(=C(N2)C(=O)O)CCN	AKOKGGIYMNWTMQ-UHFFFAOYSA-N	Organoheterocyclic compounds	Indoles and derivatives	Indolecarboxylic acids and derivatives
Indole-3-acetic%20acid%20(IAA)	C1=CC2=C(C=C1O)C(=CN2)CC(=O)O	DUUGKQCEGZLZNO-UHFFFAOYSA-N	Organoheterocyclic compounds	Indoles and derivatives	Indolyl carboxylic acids and derivatives
Lancerin;%204-C-Glucosyl-1,3,7-Trihydroxyxanthone	C1=CC2=C(C=C1O)C(=O)C3=C(O2)C(=C(C=C3O)O)[C@H]4[C@@H]([C@H]([C@@H]([C@H](O4)CO)O)O)O	JUZGXATTXYZBGK-HBVDJMOISA-N	Organoheterocyclic compounds	Benzopyrans	1-benzopyrans
cyclo-(Gly-Phe)	C1C(=O)N[C@H](C(=O)N1)CC2=CC=CC=C2	UZOJHXFWJFSFAI-VIFPVBQESA-N	Organic acids and derivatives	Carboxylic acids and derivatives	Amino acids, peptides, and analogues
2,3-Dihydroxybenzoic%20Acid	OC1=C(C(=O)O)C=CC=C1O	GLDQAMYCGOIJDV-UHFFFAOYSA-N	Benzenoids	Benzene and substituted derivatives	Benzoic acids and derivatives
1,2,3,4-Tetrahydro-3-carboxy-2-carboline	C1C(NCC2=C1C3=CC=CC=C3N2)C(=O)O	FSNCEEGOMTYXKY-UHFFFAOYSA-N	Organoheterocyclic compounds	Indoles and derivatives	Pyridoindoles
2,5-Dihydroxybenzoic%20acid;%20Gentisic%20Acid	C(C=1C(O)=CC=C(O)C1)(=O)O.OC1=C(C(=O)O)C=C(C=C1)O	YREROAPXUOXCGI-UHFFFAOYSA-N	Benzenoids	Benzene and substituted derivatives	Benzoic acids and derivatives
N-((9E,11E)-13-methylpentadeca-9,11-dien-1-yl)acetamide	CC(/C=C/C=C/CCCCCCCCNC(C)=O)CC	KHELTAZQSSUPQF-PXELCPQFSA-N	Organic acids and derivatives	Carboxylic acids and derivatives	Carboxylic acid derivatives
2,6-Di-tert-butylphenol	C(C)(C)(C)C1=C(C(=CC=C1)C(C)(C)C)O	DKCPKDPYUFEZCP-UHFFFAOYSA-N	Benzenoids	Benzene and substituted derivatives	Phenylpropanes
6,8-Diprenylnaringenin;%20Lonchocarpol%20A	CC(=CCC1=C(C(=C2C(=C1O)C(=O)C[C@H](O2)C3=CC=C(C=C3)O)CC=C(C)C)O)C	HCNLDGTUMBOHKT-NRFANRHFSA-N	Phenylpropanoids and polyketides	Flavonoids	Flavans
2-(Formylamino)benzoic%20acid	C(=O)NC1=C(C(=O)O)C=CC=C1	LLLPDUXGHXIXIW-UHFFFAOYSA-N	Benzenoids	Benzene and substituted derivatives	Benzoic acids and derivatives
2-Feruloyl-sn-glycerol	C(\C=C\C1=CC(OC)=C(O)C=C1)(=O)OC(CO)CO	NAGSENZTVXJXSW-HWKANZROSA-N	Phenylpropanoids and polyketides	Cinnamic acids and derivatives	Hydroxycinnamic acids and derivatives
2-Hydroxy-3-(4-Hydroxyphenyl)Propanoic%20Acid	OC(C(=O)O)CC1=CC=C(C=C1)O	JVGVDSSUAVXRDY-UHFFFAOYSA-N	Phenylpropanoids and polyketides	Phenylpropanoic acids	Unassigned
2-Hydroxy-3-phenylpropanoic%20acid	OC(C(=O)O)CC1=CC=CC=C1	VOXXWSYKYCBWHO-UHFFFAOYSA-N	Phenylpropanoids and polyketides	Phenylpropanoic acids	Unassigned
2-Hydroxycinnamic%20acid	OC1=C(C=CC(=O)O)C=CC=C1	PMOWTIHVNWZYFI-UHFFFAOYSA-N	Phenylpropanoids and polyketides	Cinnamic acids and derivatives	Hydroxycinnamic acids and derivatives
2-Hydroxyphenylacetic%20acid	OC1=C(C=CC=C1)CC(=O)O	CCVYRRGZDBSHFU-UHFFFAOYSA-N	Benzenoids	Benzene and substituted derivatives	Phenylacetic acids
2-O-Galloyl-D-glucose	C(C1=CC(O)=C(O)C(O)=C1)(=O)O[C@@H](C=O)[C@@H](O)[C@H](O)[C@H](O)CO	NBZMHIIBAFCDKV-RBLKWDMZSA-N	Benzenoids	Benzene and substituted derivatives	Benzoic acids and derivatives
2-O-Salicyl-6-O-Galloyl-D-Glucose	C(C=1C(O)=CC=CC1)O[C@@H](C=O)[C@@H](O)[C@H](O)[C@H](O)COC(C1=CC(O)=C(O)C(O)=C1)=O	WFNWZLHJBQKRCC-UKBAYJJMSA-N	Benzenoids	Benzene and substituted derivatives	Benzoic acids and derivatives
3,4,5-Trimethoxycinnamic%20acid	COC=1C=C(C=CC(=O)O)C=C(C1OC)OC	YTFVRYKNXDADBI-UHFFFAOYSA-N	Phenylpropanoids and polyketides	Cinnamic acids and derivatives	Hydroxycinnamic acids and derivatives
3,4,5-trimethoxybenzaldehyde	COC=1C=C(C=O)C=C(C1OC)OC	OPHQOIGEOHXOGX-UHFFFAOYSA-N	Benzenoids	Benzene and substituted derivatives	Benzoyl derivatives
3,4-Dihydroxybenzeneacetic%20acid	OC=1C=C(C=CC1O)CC(=O)O	CFFZDZCDUFSOFZ-UHFFFAOYSA-N	Benzenoids	Phenols	Benzenediols
N2-Acetylornithine	CC(=O)N[C@@H](CCCN)C(=O)O	JRLGPAXAGHMNOL-LURJTMIESA-N	Organic acids and derivatives	Carboxylic acids and derivatives	Amino acids, peptides, and analogues
3,4-Dimethoxycinnamic%20acid	COC=1C=C(C=CC(=O)O)C=CC1OC	HJBWJAPEBGSQPR-UHFFFAOYSA-N	Phenylpropanoids and polyketides	Cinnamic acids and derivatives	Hydroxycinnamic acids and derivatives
3,4-Dimethoxyphenyl%20acetic%20acid	COC=1C=C(C=CC1OC)CC(=O)O	WUAXWQRULBZETB-UHFFFAOYSA-N	Benzenoids	Benzene and substituted derivatives	Methoxybenzenes
3,5-Di-tert-butylbenzoic%20acid	C(C)(C)(C)C=1C=C(C(=O)O)C=C(C1)C(C)(C)C	NCTSLPBQVXUAHR-UHFFFAOYSA-N	Benzenoids	Benzene and substituted derivatives	Phenylpropanes
L-Glutamyl-L-valine	CC(C)C(C(=O)O)NC(=O)CCC(C(=O)O)N	AQAKHZVPOOGUCK-UHFFFAOYSA-N	Organic acids and derivatives	Carboxylic acids and derivatives	Amino acids, peptides, and analogues
3,6-Di-O-caffeoyl%20glucose	C(\C=C\C1=CC(O)=C(O)C=C1)(=O)O[C@H]([C@H](C=O)O)[C@H](O)[C@H](O)COC(\C=C\C1=CC(O)=C(O)C=C1)=O	AZVICZHMXBNICI-SWMROXQNSA-N	Phenylpropanoids and polyketides	Cinnamic acids and derivatives	Hydroxycinnamic acids and derivatives
3-Aminosalicylic%20acid	NC1=C(C(C(=O)O)=CC=C1)O	IQGMRVWUTCYCST-UHFFFAOYSA-N	Benzenoids	Benzene and substituted derivatives	Benzoic acids and derivatives
Rubianol-f	CC(C)C1CC2C3[C@]1(CC[C@@]4(C3(CC=C5[C@H]4[C@@H](C[C@@H]6[C@@]5(C[C@@H]([C@@H](C6(C)C)O)O)C)O)C)C)CO2	UFWYEVYMSNUQKW-JHMCLQGRSA-N	Lipids and lipid-like molecules	Prenol lipids	Sesterterpenoids
2,5,8-trimethyldeca-2,4,7-triene-1,10-diol	CC(CO)=CC=C(CC=C(CCO)C)C	PKAAIQQHARAGAU-UHFFFAOYSA-N	Lipids and lipid-like molecules	Fatty Acyls	Fatty alcohols
3-O-Galloyl-D-glucose	C(C1=CC(O)=C(O)C(O)=C1)(=O)O[C@H]([C@H](C=O)O)[C@H](O)[C@H](O)CO	DUPUAYOTOWVLFB-RBLKWDMZSA-N	Benzenoids	Benzene and substituted derivatives	Benzoic acids and derivatives
Eucalyptin%20(5-Hydroxy-7,4'-dimethoxy-6,8-dimethylflavone)	CC1=C(C2=C(C(=C1OC)C)OC(=CC2=O)C3=CC=C(C=C3)OC)O	NHMMAMIRMITGRD-UHFFFAOYSA-N	Phenylpropanoids and polyketides	Flavonoids	O-methylated flavonoids
3-hydroxybenzaldehyde	OC=1C=C(C=O)C=CC1	IAVREABSGIHHMO-UHFFFAOYSA-N	Organic oxygen compounds	Organooxygen compounds	Carbonyl compounds
4-Aminobenzoic%20acid	NC1=CC=C(C(=O)O)C=C1	ALYNCZNDIQEVRV-UHFFFAOYSA-N	Benzenoids	Benzene and substituted derivatives	Benzoic acids and derivatives
4-Aminosalicylic%20acid	NC=1C=C(C(C(=O)O)=CC1)O	WUBBRNOQWQTFEX-UHFFFAOYSA-N	Benzenoids	Benzene and substituted derivatives	Benzoic acids and derivatives
4-Hydroxybenzoic%20acid	OC1=CC=C(C(=O)O)C=C1	FJKROLUGYXJWQN-UHFFFAOYSA-N	Benzenoids	Benzene and substituted derivatives	Benzoic acids and derivatives
4-Hydroxyphenyllactic%20Acid	OC1=CC=C(C=C1)C(C(=O)O)(O)C	HXIPUYVSSGKLFF-UHFFFAOYSA-N	Benzenoids	Phenols	1-hydroxy-2-unsubstituted benzenoids
4-Methoxycinnamic%20acid	COC1=CC=C(C=CC(=O)O)C=C1	AFDXODALSZRGIH-UHFFFAOYSA-N	Phenylpropanoids and polyketides	Cinnamic acids and derivatives	Cinnamic acids
4-Methylbenzoic%20acid	CC1=CC=C(C(=O)O)C=C1	LPNBBFKOUUSUDB-UHFFFAOYSA-N	Benzenoids	Benzene and substituted derivatives	Benzoic acids and derivatives
4-hydroxystyrene	OC1=CC=C(C=C)C=C1	FUGYGGDSWSUORM-UHFFFAOYSA-N	Benzenoids	Benzene and substituted derivatives	Styrenes
5-Glucosyloxy-2-Hydroxybenzoic%20acid%20methyl%20ester	COC(C1=C(C=CC(=C1)OC1[C@H](O)[C@@H](O)[C@H](O)[C@H](O1)CO)O)=O	MGHALSLLZDKNHY-GRJWACCOSA-N	Organic oxygen compounds	Organooxygen compounds	Carbohydrates and carbohydrate conjugates
5-O-Galloyl-D-hamamelose	C(C1=CC(O)=C(O)C(O)=C1)(=O)OC[C@H]([C@H]([C@@](C=O)(CO)O)O)O	MQGARGAMUAQBHR-IRUJWGPZSA-N	Benzenoids	Benzene and substituted derivatives	Benzoic acids and derivatives
5(S),15(S)-DiHETE;%205,15-Dihydroxy-6,8,11,13-Eicosatetraenoic%20Acid	CCCCC[C@H](O)/C=C/C=C\C\C=C/C=C/[C@@H](O)CCCC(O)=O	UXGXCGPWGSUMNI-BVHTXILBSA-N	Lipids and lipid-like molecules	Fatty Acyls	Eicosanoids
7-Caffeoylsedoheptulose	C(\C=C\C1=CC(O)=C(O)C=C1)(=O)C([C@H]([C@H]([C@H]([C@@H](C(CO)=O)O)O)O)O)O	PXYHHRAYTYCTPY-RDXCEJDYSA-N	Phenylpropanoids and polyketides	Cinnamic acids and derivatives	Hydroxycinnamic acids and derivatives
Benzoic%20acid	C(C1=CC=CC=C1)(=O)O	WPYMKLBDIGXBTP-UHFFFAOYSA-N	Benzenoids	Benzene and substituted derivatives	Benzoic acids and derivatives
Caffeic%20acid	C(\C=C\C1=CC(O)=C(O)C=C1)(=O)O	QAIPRVGONGVQAS-DUXPYHPUSA-N	Phenylpropanoids and polyketides	Cinnamic acids and derivatives	Hydroxycinnamic acids and derivatives
Caffeoyl-p-coumaroyltartaric%20acid	C(\C=C\C1=CC(O)=C(O)C=C1)(=O)C(C(C(=O)O)(O)C(\C=C\C1=CC=C(C=C1)O)=O)(O)C(=O)O	CIPKSQKYYDECBC-LUZURFALSA-N	Phenylpropanoids and polyketides	Cinnamic acids and derivatives	Hydroxycinnamic acids and derivatives
DL-3-Phenyllactic%20acid	C1(=CC=CC=C1)CC(C(=O)O)O	VOXXWSYKYCBWHO-UHFFFAOYSA-N	Phenylpropanoids and polyketides	Phenylpropanoic acids	Unassigned
Dihydrocaffeoylglucose	C(CCC1=CC(O)=C(O)C=C1)(=O)C(=O)[C@H](O)[C@@H](O)[C@H](O)[C@H](O)CO	GSPLKHICTPQJPP-RZFFKMDDSA-N	Organic oxygen compounds	Organooxygen compounds	Carbohydrates and carbohydrate conjugates
Dihydroferulic%20Acid	C(CCC1=CC(OC)=C(O)C=C1)(=O)O	BOLQJTPHPSDZHR-UHFFFAOYSA-N	Phenylpropanoids and polyketides	Phenylpropanoic acids	Unassigned
Ethyl%20caffeate	C(\C=C\C1=CC(O)=C(O)C=C1)(=O)OCC	WDKYDMULARNCIS-GQCTYLIASA-N	Phenylpropanoids and polyketides	Cinnamic acids and derivatives	Hydroxycinnamic acids and derivatives
Ethyl%20ferulate	C(\C=C\C1=CC(OC)=C(O)C=C1)(=O)OCC	ATJVZXXHKSYELS-FNORWQNLSA-N	Phenylpropanoids and polyketides	Cinnamic acids and derivatives	Hydroxycinnamic acids and derivatives
Ethyl%20phenylacetate	C1(=CC=CC=C1)CC(=O)OCC	DULCUDSUACXJJC-UHFFFAOYSA-N	Benzenoids	Benzene and substituted derivatives	Unassigned
Ethylsalicylate	C(C)OC=1C(C(=O)[O-])=CC=CC1	XDZMPRGFOOFSBL-UHFFFAOYSA-M	Benzenoids	Benzene and substituted derivatives	Benzoic acids and derivatives
Ferulic%20acid%20methyl%20ester	COC(\C=C\C1=CC(OC)=C(O)C=C1)=O	AUJXJFHANFIVKH-GQCTYLIASA-N	Phenylpropanoids and polyketides	Cinnamic acids and derivatives	Hydroxycinnamic acids and derivatives
Ferulic%20acid	C(\C=C\C1=CC(OC)=C(O)C=C1)(=O)O	KSEBMYQBYZTDHS-HWKANZROSA-N	Phenylpropanoids and polyketides	Cinnamic acids and derivatives	Hydroxycinnamic acids and derivatives
Feruloylmalic%20acid	C(\C=C\C1=CC(OC)=C(O)C=C1)(=O)C(C(=O)O)(O)CC(=O)O	MULKVWHREVVCBN-HWKANZROSA-N	Phenylpropanoids and polyketides	Cinnamic acids and derivatives	Hydroxycinnamic acids and derivatives
Gallic%20acid	C(C1=CC(O)=C(O)C(O)=C1)(=O)O	LNTHITQWFMADLM-UHFFFAOYSA-N	Benzenoids	Benzene and substituted derivatives	Benzoic acids and derivatives
Glucosyloxybenzoic%20acid	C1([C@H](O)[C@@H](O)[C@H](O)[C@H](O1)CO)OC1=C(C(=O)O)C=CC=C1	TZPBMNKOLMSJPF-TWEVDUBQSA-N	Organic oxygen compounds	Organooxygen compounds	Carbohydrates and carbohydrate conjugates
Homogentisic%20acid	C(CC=1C(O)=CC=C(O)C1)(=O)O	IGMNYECMUMZDDF-UHFFFAOYSA-N	Benzenoids	Benzene and substituted derivatives	Phenylacetic acids
Homophthalicacid	C(CC=1C(C(=O)O)=CC=CC1)(=O)O	ZHQLTKAVLJKSKR-UHFFFAOYSA-N	Benzenoids	Benzene and substituted derivatives	Benzoic acids and derivatives
Homovanillic%20acid%20sulfate	S(=O)(=O)(O)O.C(CC1=CC(OC)=C(O)C=C1)(=O)O	PMQKLOVRLKIRJP-UHFFFAOYSA-N	Benzenoids	Phenols	Methoxyphenols
Homovanillic%20acid;%204-Hydroxy-3-methoxyphenylacetic%20acid	OC1=C(C=C(C=C1)CC(=O)O)OC.C(CC1=CC(OC)=C(O)C=C1)(=O)O	GFPUXHKMOOJQIG-UHFFFAOYSA-N	Benzenoids	Phenols	Methoxyphenols
Isoferulic%20Acid	C(\C=C\C1=CC(O)=C(OC)C=C1)(=O)O	QURCVMIEKCOAJU-HWKANZROSA-N	Phenylpropanoids and polyketides	Cinnamic acids and derivatives	Hydroxycinnamic acids and derivatives
Mandelic%20acid	C(C(O)C1=CC=CC=C1)(=O)O	IWYDHOAUDWTVEP-UHFFFAOYSA-N	Benzenoids	Benzene and substituted derivatives	Unassigned
Methyl%202,4-dihydroxyphenylacetate	OC1=C(C=CC(=C1)O)CC(=O)OC	FSSXHUOFRDFPMF-UHFFFAOYSA-N	Benzenoids	Phenols	Benzenediols
Methyl%203-oxo-2-phenylpropanoate	O=CC(C(=O)OC)C1=CC=CC=C1	ORJFSDFCHJQCOH-UHFFFAOYSA-N	Benzenoids	Benzene and substituted derivatives	Phenylacetaldehydes
Methyl%204-hydroxybenzoate	OC1=CC=C(C(=O)OC)C=C1	LXCFILQKKLGQFO-UHFFFAOYSA-N	Benzenoids	Benzene and substituted derivatives	Benzoic acids and derivatives
Methyl%20Hydroxycinnamate	OC(C(=O)OC)=CC1=CC=CC=C1	KIHSYCSFCHJUQR-UHFFFAOYSA-N	Benzenoids	Benzene and substituted derivatives	Phenylpyruvic acid derivatives
Methyl%20gallate	C(C1=CC(O)=C(O)C(O)=C1)(=O)OC	FBSFWRHWHYMIOG-UHFFFAOYSA-N	Benzenoids	Benzene and substituted derivatives	Benzoic acids and derivatives
Methyl%20sinapate	C(\C=C\C1=CC(OC)=C(O)C(OC)=C1)(=O)OC	JHLPYWLKSLVYOI-SNAWJCMRSA-N	Phenylpropanoids and polyketides	Cinnamic acids and derivatives	Hydroxycinnamic acids and derivatives
O-Feruloylgalactaric%20acid	C(\C=C\C1=CC(OC)=C(O)C=C1)(=O)O[C@@H](C(=O)O)[C@@H](O)[C@@H](O)[C@H](O)C(=O)O	JZRAOXRUPYISEN-MOEPPVLCSA-N	Organic oxygen compounds	Organooxygen compounds	Carbohydrates and carbohydrate conjugates
Phenethyl%20caffeate	C(\C=C\C1=CC(O)=C(O)C=C1)(=O)OCCC1=CC=CC=C1	SWUARLUWKZWEBQ-VQHVLOKHSA-N	Phenylpropanoids and polyketides	Cinnamic acids and derivatives	Hydroxycinnamic acids and derivatives
Propyl%204-hydroxybenzoate	OC1=CC=C(C(=O)OCCC)C=C1	QELSKZZBTMNZEB-UHFFFAOYSA-N	Benzenoids	Benzene and substituted derivatives	Benzoic acids and derivatives
Sinapic%20acid	C(\C=C\C1=CC(OC)=C(O)C(OC)=C1)(=O)O	PCMORTLOPMLEFB-ONEGZZNKSA-N	Phenylpropanoids and polyketides	Cinnamic acids and derivatives	Hydroxycinnamic acids and derivatives
Sinapoyl-p-coumaroyltartaric%20acid	C(\C=C\C1=CC(OC)=C(O)C(OC)=C1)(=O)C(C(C(=O)O)(O)C(\C=C\C1=CC=C(C=C1)O)=O)(O)C(=O)O	PPGWMSYUGDLKCK-NXZHAISVSA-N	Phenylpropanoids and polyketides	Cinnamic acids and derivatives	Hydroxycinnamic acids and derivatives
9(10)-EpOME;(9R,10S)-(12Z)-9,10-Epoxyoctadecenoic%20acid	CCCCC\C=C/C[C@@H]1O[C@@H]1CCCCCCCC(O)=O	FBUKMFOXMZRGRB-SQGUUQMOSA-N	Lipids and lipid-like molecules	Fatty Acyls	Fatty acids and conjugates
13-KODE;%20(9Z,11E)-13-Oxooctadeca-9,11-dienoic%20acid	CCCCCC(=O)\C=C\C=C/CCCCCCCC(O)=O	JHXAZBBVQSRKJR-BSZOFBHHSA-N	Lipids and lipid-like molecules	Fatty Acyls	Lineolic acids and derivatives
Terephthalic%20acid	C(C1=CC=C(C(=O)O)C=C1)(=O)O	KKEYFWRCBNTPAC-UHFFFAOYSA-N	Benzenoids	Benzene and substituted derivatives	Benzoic acids and derivatives
Tropic%20acid	C(C(CO)C1=CC=CC=C1)(=O)O	JACRWUWPXAESPB-UHFFFAOYSA-N	Organic acids and derivatives	Hydroxy acids and derivatives	Beta hydroxy acids and derivatives
Vanillic%20acid	C(C1=CC(OC)=C(O)C=C1)(=O)O	WKOLLVMJNQIZCI-UHFFFAOYSA-N	Benzenoids	Benzene and substituted derivatives	Benzoic acids and derivatives
Vanillic%20acid%20methyl%20ester	COC(C1=CC(OC)=C(O)C=C1)=O	BVWTXUYLKBHMOX-UHFFFAOYSA-N	Benzenoids	Benzene and substituted derivatives	Benzoic acids and derivatives
alpha-Asarone	C\C=C\C1=C(OC)C=C(OC)C(OC)=C1	RKFAZBXYICVSKP-AATRIKPKSA-N	Benzenoids	Phenol ethers	Anisoles
alpha-hexylcinnamaldehyde	C(CCCCC)C(C=O)=CC1=CC=CC=C1	GUUHFMWKWLOQMM-UHFFFAOYSA-N	Phenylpropanoids and polyketides	Cinnamaldehydes	Unassigned
p-Coumaric%20acid	C(\C=C\C1=CC=C(C=C1)O)(=O)O	NGSWKAQJJWESNS-ZZXKWVIFSA-N	Phenylpropanoids and polyketides	Cinnamic acids and derivatives	Hydroxycinnamic acids and derivatives
p-Coumaric%20acid%20ethyl%20ester	C(C)OC(\C=C\C1=CC=C(C=C1)O)=O	ZOQCEVXVQCPESC-VMPITWQZSA-N	Phenylpropanoids and polyketides	Cinnamic acids and derivatives	Hydroxycinnamic acids and derivatives
p-Coumaric%20acid%20methyl%20ester	COC(\C=C\C1=CC=C(C=C1)O)=O	NITWSHWHQAQBAW-QPJJXVBHSA-N	Phenylpropanoids and polyketides	Cinnamic acids and derivatives	Hydroxycinnamic acids and derivatives
p-Coumaroylmalic%20acid	C(\C=C\C1=CC=C(C=C1)O)(=O)C(C(=O)O)(O)CC(=O)O	UZDZNIDGWLPLJL-ZZXKWVIFSA-N	Phenylpropanoids and polyketides	Cinnamic acids and derivatives	Hydroxycinnamic acids and derivatives
1,2,4-Trihydroxyanthraquinone	OC1=C(C=C(C=2C(C3=CC=CC=C3C(C12)=O)=O)O)O	BBNQQADTFFCFGB-UHFFFAOYSA-N	Benzenoids	Anthracenes	Anthraquinones
1-Hydroxy-3-Methoxy-9,10-Anthraquinone	OC1=CC(=CC=2C(C3=CC=CC=C3C(C12)=O)=O)OC	LRCKMFKYRNMGRL-UHFFFAOYSA-N	Benzenoids	Anthracenes	Anthraquinones
1-Hydroxyanthraquinone	OC1=CC=CC=2C(C3=CC=CC=C3C(C12)=O)=O	BTLXPCBPYBNQNR-UHFFFAOYSA-N	Benzenoids	Anthracenes	Anthraquinones
2,5-dihydroxy-1-methoxy-anthraquinone	OC1=C(C=2C(C3=CC=CC(=C3C(C2C=C1)=O)O)=O)OC	PIYPSEKICNYSKT-UHFFFAOYSA-N	Benzenoids	Anthracenes	Anthraquinones
9,10-Anthraquinone	C1=CC=CC=2C(C3=CC=CC=C3C(C12)=O)=O	RZVHIXYEVGDQDX-UHFFFAOYSA-N	Benzenoids	Anthracenes	Anthraquinones
9-hydroxy-2,3-dimethoxy-1,4-anthraquinone	OC=1C2=CC=CC=C2C=C2C(C(=C(C(C12)=O)OC)OC)=O	CEFJGMDSSUFEBS-UHFFFAOYSA-N	Benzenoids	Anthracenes	Anthraquinones
1-(3,5-Dihydroxyphenyl)pentadecan-1-one	OC=1C=C(C=C(C1)O)C(CCCCCCCCCCCCCC)=O	DMSWJQXDZQFAGW-UHFFFAOYSA-N	Organic oxygen compounds	Organooxygen compounds	Carbonyl compounds
2,5-Dimethoxybenzoquinone	COC=1C(C=C(C(C1)=O)OC)=O	RMMPZDDLWLALLJ-UHFFFAOYSA-N	Organic oxygen compounds	Organooxygen compounds	Carbonyl compounds
2,6-Di-Tert-Butyl-1,4-Benzoquinone	C(C)(C)(C)C=1C(C(=CC(C1)=O)C(C)(C)C)=O	RDQSIADLBQFVMY-UHFFFAOYSA-N	Lipids and lipid-like molecules	Prenol lipids	Monoterpenoids
2,6-Dimethoxy-1,4-benzoquinone	COC=1C(C(=CC(C1)=O)OC)=O	OLBNOBQOQZRLMP-UHFFFAOYSA-N	Organic oxygen compounds	Organooxygen compounds	Carbonyl compounds
2-Methoxy-6-undecyl-1,4-benzoquinone	COC=1C(C(=CC(C1)=O)CCCCCCCCCCC)=O	LRYVDYNQYBMNJP-UHFFFAOYSA-N	Organic oxygen compounds	Organooxygen compounds	Carbonyl compounds
6,9,10-Trihydroxyoctadec-7-enoic%20acid;%20Sanleng%20acid	CCCCCCCCC(O)C(O)C=CC(O)CCCCC(O)=O	KFPLVZLISLBBSJ-UHFFFAOYSA-N	Lipids and lipid-like molecules	Fatty Acyls	Fatty acids and conjugates
methylalpha-aspartylphenylalaninate	CN[C@@H](CC(O)=O)C(=O)N[C@@H](CC1=CC=CC=C1)C(=O)[O-]	JNECYPFNTGEHGG-QWRGUYRKSA-M	Organic acids and derivatives	Carboxylic acids and derivatives	Amino acids, peptides, and analogues
2,6-Dimethyl-7-octene-2,3,6-triol	CC(C)(C(CCC(C=C)(O)C)O)O	CNYFGLAROLNGDG-UHFFFAOYSA-N	Lipids and lipid-like molecules	Fatty Acyls	Fatty alcohols
3,7-Dimethyl-2,6-octadienyl%206-O-(Beta-D-Glucopyranosyl)-Beta-D-glucopyranoside	[C@@H]1([C@H](O)[C@@H](O)[C@H](O)[C@H](O1)CO)OC[C@@H]1[C@H]([C@@H]([C@H]([C@H](OCC=C(CCC=C(C)C)C)O1)O)O)O	GOGLDSNWBWSTJG-OALZDZJCSA-N	Lipids and lipid-like molecules	Prenol lipids	Terpene glycosides
N,N'-Dimethylarginine;SDMA	CNC(=NC)NCCC[C@@H](C(=O)O)N	HVPFXCBJHIIJGS-LURJTMIESA-N	Organic acids and derivatives	Carboxylic acids and derivatives	Amino acids, peptides, and analogues
Nerolidol	OC(C)(C=C)CCC=C(C)CCC=C(C)C	FQTLCLSUCSAZDY-UHFFFAOYSA-N	Lipids and lipid-like molecules	Prenol lipids	Sesquiterpenoids
2,2'-Cyclouridine	C1=CN2C3C(C(C(O3)CO)O)OC2=NC1=O	UUGITDASWNOAGG-UHFFFAOYSA-N	Organoheterocyclic compounds	Diazines	Pyrimidines and pyrimidine derivatives
Aurantiamide%20acetate	CC(=O)OCC(CC1=CC=CC=C1)NC(=O)C(CC2=CC=CC=C2)NC(=O)C3=CC=CC=C3	VZPAURMDJZOGHU-UHFFFAOYSA-N	Organic acids and derivatives	Carboxylic acids and derivatives	Amino acids, peptides, and analogues
Cantleyine	CC1C(CC2=C(C=NC=C12)C(=O)OC)O	MJGLQDXKEOEIFB-UHFFFAOYSA-N	Organoheterocyclic compounds	Pyridines and derivatives	Pyridinecarboxylic acids and derivatives
Daminozide	CN(C)NC(=O)CCC(=O)O	NOQGZXFMHARMLW-UHFFFAOYSA-N	Lipids and lipid-like molecules	Fatty Acyls	Fatty acids and conjugates
Lithospermoside	C1=CC(=CC#N)C(C(C1O)O)OC2C(C(C(C(O2)CO)O)O)O	WIIDBJNWXCWLKF-UHFFFAOYSA-N	Organic oxygen compounds	Organooxygen compounds	Carbohydrates and carbohydrate conjugates
Lumichrome	CC1=CC2=C(C=C1C)N=C3C(=N2)C(=O)NC(=O)N3	ZJTJUVIJVLLGSP-UHFFFAOYSA-N	Organoheterocyclic compounds	Pteridines and derivatives	Alloxazines and isoalloxazines
Neopterin	C1=C(N=C2C(=O)NC(=NC2=N1)N)C(C(CO)O)O	BMQYVXCPAOLZOK-UHFFFAOYSA-N	Organoheterocyclic compounds	Pteridines and derivatives	Pterins and derivatives
Nicotianamine	C1CN(C1C(=O)O)CCC(C(=O)O)NCCC(C(=O)O)N	KRGPXXHMOXVMMM-UHFFFAOYSA-N	Organic acids and derivatives	Carboxylic acids and derivatives	Amino acids, peptides, and analogues
Patriscabratine	CC(=O)NC(CC1=CC=CC=C1)COC(=O)C(CC2=CC=CC=C2)NC(=O)C3=CC=CC=C3	UBQCFEASTTXIKB-UHFFFAOYSA-N	Organic acids and derivatives	Carboxylic acids and derivatives	Amino acids, peptides, and analogues
Tetraphyllin%20A	C1CC(C=C1)(C#N)OC2C(C(C(C(O2)CO)O)O)O	HBCFZAXOSTUEHA-UHFFFAOYSA-N	Organic oxygen compounds	Organooxygen compounds	Carbohydrates and carbohydrate conjugates
alanine%20betaine	C[N+](C)(C)CCC(=O)[O-]	ACZVSMNFVFBOTM-UHFFFAOYSA-N	Organic nitrogen compounds	Organonitrogen compounds	Quaternary ammonium salts
Nicotinic%20Acid%20Methyl%20Ester(Methyl%20Nicotinate)	COC(=O)C1=CN=CC=C1	YNBADRVTZLEFNH-UHFFFAOYSA-N	Organoheterocyclic compounds	Pyridines and derivatives	Pyridinecarboxylic acids and derivatives
1,2-Methylenedioxy-3,10,11-trimethoxynoraporphine	COC1=C(C2=C(CC3C4=C(CCN3)C(=C5C(=C42)OCO5)OC)C=C1)OC	CHTZCWLHHIYAJY-UHFFFAOYSA-N	Alkaloids and derivatives	Aporphines	Unassigned
Passibiflorin	CC1C(C(C(C(O1)OC2CC(C=C2)(C#N)OC3C(C(C(C(O3)CO)O)O)O)O)O)O	WSDAOKMCDDRLAL-UHFFFAOYSA-N	Organic oxygen compounds	Organooxygen compounds	Carbohydrates and carbohydrate conjugates
Cimicifugamide	COC1=C(C=CC(=C1)CCNC(=O)C=CC2=CC(=C(C=C2)OC3C(C(C(C(O3)CO)O)O)O)OC)O	UYSRWDYTMGBBHP-UHFFFAOYSA-N	Organic oxygen compounds	Organooxygen compounds	Carbohydrates and carbohydrate conjugates
Kukoamine%20B	C1=CC(=C(C=C1CCC(=O)NCCCNCCCCN(CCCN)C(=O)CCC2=CC(=C(C=C2)O)O)O)O	IWRAOCFRRTWUDF-UHFFFAOYSA-N	Benzenoids	Phenols	Benzenediols
N-Cis-Feruloyltyramine	COC1=C(C=CC(=C1)C=CC(=O)NCCC2=CC=C(C=C2)O)O	NPNNKDMSXVRADT-UHFFFAOYSA-N	Phenylpropanoids and polyketides	Cinnamic acids and derivatives	Hydroxycinnamic acids and derivatives
N-Feruloyltyramine;%20Moupinamide	COC1=C(C=CC(=C1)/C=C/C(=O)NCCC2=CC=C(C=C2)O)O	NPNNKDMSXVRADT-WEVVVXLNSA-N	Benzenoids	Phenols	Methoxyphenols
cis-Moschamine	COC1=C(C=CC(=C1)C=CC(=O)NCCC2=CNC3=C2C=C(C=C3)O)O	WGHKJYWENWLOMY-UHFFFAOYSA-N	Organoheterocyclic compounds	Indoles and derivatives	Tryptamines and derivatives
6-Deoxyfagomine	CC1C(C(CCN1)O)O	RMJCALHKIHCSMY-UHFFFAOYSA-N	Organoheterocyclic compounds	Piperidines	Unassigned
Angustoline	CC(C1=C2C=C3C4=C(CCN3C(=O)C2=CN=C1)C5=CC=CC=C5N4)O	NDHJXXLIRWAMEN-UHFFFAOYSA-N	Organoheterocyclic compounds	Indoles and derivatives	Pyridoindoles
Canthin-6-one	C1=CC=C2C(=C1)C3=C4N2C(=O)C=CC4=NC=C3	ZERVJPYNQLONEK-UHFFFAOYSA-N	Alkaloids and derivatives	Indolonaphthyridine alkaloids	Unassigned
Corynoxeine	COC=C(C1CC2C3(CCN2CC1C=C)C4=CC=CC=C4NC3=O)C(=O)OC	MUVGVMUWMAGNSY-UHFFFAOYSA-N	Organoheterocyclic compounds	Indolizidines	Unassigned
Corynoxine	CCC1CN2CCC3(C2CC1C(=COC)C(=O)OC)C4=CC=CC=C4NC3=O	DAXYUDFNWXHGBE-UHFFFAOYSA-N	Organoheterocyclic compounds	Indolizidines	Unassigned
Dihydrocorynantheine	CCC1CN2CCC3=C(C2CC1C(=COC)C(=O)OC)NC4=CC=CC=C34	NMLUOJBSAYAYEM-UHFFFAOYSA-N	Alkaloids and derivatives	Corynanthean-type alkaloids	Unassigned
Ergotamine	CC1(C(=O)N2C(C(=O)N3CCCC3C2(O1)O)CC4=CC=CC=C4)NC(=O)C5CN(C6CC7=CNC8=CC=CC(=C78)C6=C5)C	XCGSFFUVFURLIX-UHFFFAOYSA-N	Alkaloids and derivatives	Ergoline and derivatives	Lysergic acids and derivatives
Gambirine	CCC1CN2CCC3=C(C2CC1C(=COC)C(=O)OC)NC4=C3C(=CC=C4)O	IIRZCWUQUBSIPF-UHFFFAOYSA-N	Alkaloids and derivatives	Corynanthean-type alkaloids	Unassigned
Geissoschizine%20methyl%20ether	CC=C1CN2CCC3=C(C2CC1C(=COC)C(=O)OC)NC4=CC=CC=C34	VAMJZLUOKJRHOW-UHFFFAOYSA-N	Alkaloids and derivatives	Corynanthean-type alkaloids	Unassigned
Indigo	C1=CC=C2C(=C1)C(=C(N2)C3=NC4=CC=CC=C4C3=O)O	QQILFGKZUJYXGS-UHFFFAOYSA-N	Organoheterocyclic compounds	Indoles and derivatives	Hydroxyindoles
Indirubin	C1=CC=C2C(=C1)C(=C(N2)O)C3=NC4=CC=CC=C4C3=O	JNLNPCNGMHKCKO-UHFFFAOYSA-N	Organoheterocyclic compounds	Indoles and derivatives	Hydroxyindoles
Isocorynoxeine	COC=C(C1CC2C3(CCN2CC1C=C)C4=CC=CC=C4NC3=O)C(=O)OC	MUVGVMUWMAGNSY-UHFFFAOYSA-N	Organoheterocyclic compounds	Indolizidines	Unassigned
Isorhynchophyllic%20acid	CCC1CN2CCC3(C2CC1C(=COC)C(=O)O)C4=CC=CC=C4NC3=O	IQSFEAHJUMVILC-UHFFFAOYSA-N	Organoheterocyclic compounds	Indolizidines	Unassigned
Isorhynchophylline	CCC1CN2CCC3(C2CC1C(=COC)C(=O)OC)C4=CC=CC=C4NC3=O	DAXYUDFNWXHGBE-UHFFFAOYSA-N	Organoheterocyclic compounds	Indolizidines	Unassigned
Methyl%20dioxindole-3-acetate	COC(=O)CC1(C2=CC=CC=C2NC1=O)O	BHWUWPHGCCRYBU-UHFFFAOYSA-N	Organoheterocyclic compounds	Indoles and derivatives	Indolyl carboxylic acids and derivatives
Mitraphylline	CC1C2CN3CCC4(C3CC2C(=CO1)C(=O)OC)C5=CC=CC=C5NC4=O	JMIAZDVHNCCPDM-UHFFFAOYSA-N	Organoheterocyclic compounds	Indolizidines	Unassigned
N-Feruloylserotonin	COC1=C(C=CC(=C1)C=CC(=O)NCCC2=CNC3=C2C=C(C=C3)O)O	WGHKJYWENWLOMY-UHFFFAOYSA-N	Organoheterocyclic compounds	Indoles and derivatives	Tryptamines and derivatives
Rhynchophylline	CCC1CN2CCC3(C2CC1C(=COC)C(=O)OC)C4=CC=CC=C4NC3=O	DAXYUDFNWXHGBE-UHFFFAOYSA-N	Organoheterocyclic compounds	Indolizidines	Unassigned
Vallesiachotamine	CC=C(C=O)C1CC2C3=C(CCN2C=C1C(=O)OC)C4=CC=CC=C4N3	NTVLUSJWJRSPSM-UHFFFAOYSA-N	Organoheterocyclic compounds	Indoles and derivatives	Pyridoindoles
Villocarine%20A	CC=C1CN2CCC3=C(C2CC1C(=COC)C(=O)OC)NC4=CC=CC=C34	VAMJZLUOKJRHOW-UHFFFAOYSA-N	Alkaloids and derivatives	Corynanthean-type alkaloids	Unassigned
Vincoside%20lactam	C=CC1C2CC3C4=C(CCN3C(=O)C2=COC1OC5C(C(C(C(O5)CO)O)O)O)C6=CC=CC=C6N4	LBRPLJCNRZUXLS-UHFFFAOYSA-N	Organoheterocyclic compounds	Indoles and derivatives	Pyridoindoles
Yohimbine	COC(=O)C1C(CCC2C1CC3C4=C(CCN3C2)C5=CC=CC=C5N4)O	BLGXFZZNTVWLAY-UHFFFAOYSA-N	Alkaloids and derivatives	Yohimbine alkaloids	Unassigned
Integerrimine	CC=C1CC(C(C(=O)OCC2=CCN3C2C(CC3)OC1=O)(C)O)C	HKODIGSRFALUTA-UHFFFAOYSA-N	Phenylpropanoids and polyketides	Macrolides and analogues	Unassigned
Retronecine	C1CN2CC=C(C2C1O)CO	HJSJELVDQOXCHO-UHFFFAOYSA-N	Alkaloids and derivatives	Unassigned	Unassigned
Stachydrine	C[N+]1(CCCC1C(=O)[O-])C	CMUNUTVVOOHQPW-UHFFFAOYSA-N	Organic acids and derivatives	Carboxylic acids and derivatives	Amino acids, peptides, and analogues
Echinopsine	CN1C=CC(=O)C2=CC=CC=C21	CSJAXRKDCCWCSJ-UHFFFAOYSA-N	Organoheterocyclic compounds	Quinolines and derivatives	Quinolones and derivatives
Quinine	COC1=CC2=C(C=CN=C2C=C1)C(C3CC4CCN3CC4C=C)O	LOUPRKONTZGTKE-UHFFFAOYSA-N	Alkaloids and derivatives	Cinchona alkaloids	Unassigned
Xanthurenic%20Acid%208-O-Glucoside	C1=CC2=C(C(=C1)OC3C(C(C(C(O3)CO)O)O)O)NC(=CC2=O)C(=O)O	MYFHOUJDPFBJLH-UHFFFAOYSA-N	Organic oxygen compounds	Organooxygen compounds	Carbohydrates and carbohydrate conjugates
Cyclopamine	CC1CC2C(C(C3(O2)CCC4C5CC=C6CC(CCC6(C5CC4=C3C)C)O)C)NC1	QASFUMOKHFSJGL-UHFFFAOYSA-N	Lipids and lipid-like molecules	Steroids and steroid derivatives	Steroidal alkaloids
4,5-Dehydro-L-leucine	CC(=C)CC(C(=O)O)N	PABWDKROPVYJBH-UHFFFAOYSA-N	Organic acids and derivatives	Carboxylic acids and derivatives	Amino acids, peptides, and analogues
5-L-Glutamyl-L-Alanine	CC(C(=O)O)NC(=O)CCC(C(=O)O)N	WQXXXVRAFAKQJM-UHFFFAOYSA-N	Organic acids and derivatives	Carboxylic acids and derivatives	Amino acids, peptides, and analogues
6-Hydroxydopaquinone	C1=C(C(=CC(=O)C1=O)O)CC(C(=O)O)N	YWRFBISQAMHSIX-UHFFFAOYSA-N	Organic acids and derivatives	Carboxylic acids and derivatives	Amino acids, peptides, and analogues
Ala-Ala	CC(C(=O)NC(C)C(=O)O)N	DEFJQIDDEAULHB-UHFFFAOYSA-N	Organic acids and derivatives	Carboxylic acids and derivatives	Amino acids, peptides, and analogues
Ala-His	CC(C(=O)NC(CC1=CN=CN1)C(=O)O)N	XZWXFWBHYRFLEF-UHFFFAOYSA-N	Organic acids and derivatives	Carboxylic acids and derivatives	Amino acids, peptides, and analogues
Ala-Ile	CCC(C)C(C(=O)O)NC(=O)C(C)N	ZSOICJZJSRWNHX-UHFFFAOYSA-N	Organic acids and derivatives	Carboxylic acids and derivatives	Amino acids, peptides, and analogues
Ala-Ile-Asp	CCC(C)C(C(=O)NC(CC(=O)O)C(=O)O)NC(=O)C(C)N	HQJKCXHQNUCKMY-UHFFFAOYSA-N	Organic acids and derivatives	Carboxylic acids and derivatives	Amino acids, peptides, and analogues
Ala-Ile-Leu	CCC(C)C(C(=O)NC(CC(C)C)C(=O)O)NC(=O)C(C)N	TZDNWXDLYFIFPT-UHFFFAOYSA-N	Organic acids and derivatives	Carboxylic acids and derivatives	Amino acids, peptides, and analogues
Ala-Leu-Asp	CC(C)CC(C(=O)NC(CC(=O)O)C(=O)O)NC(=O)C(C)N	LBYMZCVBOKYZNS-UHFFFAOYSA-N	Organic acids and derivatives	Carboxylic acids and derivatives	Amino acids, peptides, and analogues
Ala-Leu-Glu	CC(C)CC(C(=O)NC(CCC(=O)O)C(=O)O)NC(=O)C(C)N	CCDFBRZVTDDJNM-UHFFFAOYSA-N	Organic acids and derivatives	Carboxylic acids and derivatives	Amino acids, peptides, and analogues
Ala-Lys-Val	CC(C)C(C(=O)O)NC(=O)C(CCCCN)NC(=O)C(C)N	MDNAVFBZPROEHO-UHFFFAOYSA-N	Organic acids and derivatives	Carboxylic acids and derivatives	Amino acids, peptides, and analogues
Ala-Met	CC(C(=O)NC(CCSC)C(=O)O)N	FSHURBQASBLAPO-UHFFFAOYSA-N	Organic acids and derivatives	Carboxylic acids and derivatives	Amino acids, peptides, and analogues
Ala-Phe-Arg	CC(C(=O)NC(CC1=CC=CC=C1)C(=O)NC(CCCN=C(N)N)C(=O)O)N	PEIBBAXIKUAYGN-UHFFFAOYSA-N	Organic acids and derivatives	Carboxylic acids and derivatives	Amino acids, peptides, and analogues
Ala-Tyr-Leu	CC(C)CC(C(=O)O)NC(=O)C(CC1=CC=C(C=C1)O)NC(=O)C(C)N	ZJLORAAXDAJLDC-UHFFFAOYSA-N	Organic acids and derivatives	Carboxylic acids and derivatives	Amino acids, peptides, and analogues
Arg-Gly	C(CC(C(=O)NCC(=O)O)N)CN=C(N)N	XUUXCWCKKCZEAW-UHFFFAOYSA-N	Organic acids and derivatives	Carboxylic acids and derivatives	Amino acids, peptides, and analogues
Arg-Leu	CC(C)CC(C(=O)O)NC(=O)C(CCCN=C(N)N)N	WYBVBIHNJWOLCJ-UHFFFAOYSA-N	Organic acids and derivatives	Carboxylic acids and derivatives	Amino acids, peptides, and analogues
Arg-Trp	C1=CC=C2C(=C1)C(=CN2)CC(C(=O)O)NC(=O)C(CCCN=C(N)N)N	QADCERNTBWTXFV-UHFFFAOYSA-N	Organic acids and derivatives	Carboxylic acids and derivatives	Amino acids, peptides, and analogues
Arg-Val	CC(C)C(C(=O)O)NC(=O)C(CCCN=C(N)N)N	DAQIJMOLTMGJLO-UHFFFAOYSA-N	Organic acids and derivatives	Carboxylic acids and derivatives	Amino acids, peptides, and analogues
Asn-Ile-Asp	CCC(C)C(C(=O)NC(CC(=O)O)C(=O)O)NC(=O)C(CC(=O)N)N	ANPFQTJEPONRPL-UHFFFAOYSA-N	Organic acids and derivatives	Carboxylic acids and derivatives	Amino acids, peptides, and analogues
Asn-Met-Ser	CSCCC(C(=O)NC(CO)C(=O)O)NC(=O)C(CC(=O)N)N	KEUNWIXNKVWCFL-UHFFFAOYSA-N	Organic acids and derivatives	Carboxylic acids and derivatives	Amino acids, peptides, and analogues
Asn-Phe-Asp	C1=CC=C(C=C1)CC(C(=O)NC(CC(=O)O)C(=O)O)NC(=O)C(CC(=O)N)N	LSJQOMAZIKQMTJ-UHFFFAOYSA-N	Organic acids and derivatives	Carboxylic acids and derivatives	Amino acids, peptides, and analogues
Asn-Phe-Gly	C1=CC=C(C=C1)CC(C(=O)NCC(=O)O)NC(=O)C(CC(=O)N)N	PPCORQFLAZWUNO-UHFFFAOYSA-N	Organic acids and derivatives	Carboxylic acids and derivatives	Amino acids, peptides, and analogues
Asn-Val-Leu	CC(C)CC(C(=O)O)NC(=O)C(C(C)C)NC(=O)C(CC(=O)N)N	CBHVAFXKOYAHOY-UHFFFAOYSA-N	Organic acids and derivatives	Carboxylic acids and derivatives	Amino acids, peptides, and analogues
Asp-Glu	C(CC(=O)O)C(C(=O)O)NC(=O)C(CC(=O)O)N	CKAJHWFHHFSCDT-UHFFFAOYSA-N	Organic acids and derivatives	Carboxylic acids and derivatives	Amino acids, peptides, and analogues
Asp-Ile-Leu	CCC(C)C(C(=O)NC(CC(C)C)C(=O)O)NC(=O)C(CC(=O)O)N	HOBNTSHITVVNBN-UHFFFAOYSA-N	Organic acids and derivatives	Carboxylic acids and derivatives	Amino acids, peptides, and analogues
Asp-Ile-Thr	CCC(C)C(C(=O)NC(C(C)O)C(=O)O)NC(=O)C(CC(=O)O)N	SPWXXPFDTMYTRI-UHFFFAOYSA-N	Organic acids and derivatives	Carboxylic acids and derivatives	Amino acids, peptides, and analogues
Asp-Lys	C(CCN)CC(C(=O)O)NC(=O)C(CC(=O)O)N	OAMLVOVXNKILLQ-UHFFFAOYSA-N	Organic acids and derivatives	Carboxylic acids and derivatives	Amino acids, peptides, and analogues
Asp-Phe-Leu	CC(C)CC(C(=O)O)NC(=O)C(CC1=CC=CC=C1)NC(=O)C(CC(=O)O)N	LTCKTLYKRMCFOC-UHFFFAOYSA-N	Organic acids and derivatives	Carboxylic acids and derivatives	Amino acids, peptides, and analogues
Asp-Pro-Phe	C1CC(N(C1)C(=O)C(CC(=O)O)N)C(=O)NC(CC2=CC=CC=C2)C(=O)O	XUVTWGPERWIERB-UHFFFAOYSA-N	Organic acids and derivatives	Carboxylic acids and derivatives	Amino acids, peptides, and analogues
Asp-Trp	C1=CC=C2C(=C1)C(=CN2)CC(C(=O)O)NC(=O)C(CC(=O)O)N	ZARXTZFGQZBYFO-UHFFFAOYSA-N	Organic acids and derivatives	Carboxylic acids and derivatives	Amino acids, peptides, and analogues
Asp-Val-Phe	CC(C)C(C(=O)NC(CC1=CC=CC=C1)C(=O)O)NC(=O)C(CC(=O)O)N	SFJUYBCDQBAYAJ-UHFFFAOYSA-N	Organic acids and derivatives	Carboxylic acids and derivatives	Amino acids, peptides, and analogues
Cis-L-3-hydroxyproline	C1CNC(C1O)C(=O)O	BJBUEDPLEOHJGE-UHFFFAOYSA-N	Organic acids and derivatives	Carboxylic acids and derivatives	Amino acids, peptides, and analogues
Cyclo(Ala-Gly)	CC1C(=O)NCC(=O)N1	ICCHEGCKVBMSTF-UHFFFAOYSA-N	Organic acids and derivatives	Carboxylic acids and derivatives	Amino acids, peptides, and analogues
Cyclo(D-Leu-L-Pro)	CC(C)CC1C(=O)N2CCCC2C(=O)N1	SZJNCZMRZAUNQT-UHFFFAOYSA-N	Organic acids and derivatives	Carboxylic acids and derivatives	Amino acids, peptides, and analogues
Cyclo(D-Phe-L-Pro)	C1CC2C(=O)NC(C(=O)N2C1)CC3=CC=CC=C3	QZBUWPVZSXDWSB-UHFFFAOYSA-N	Organic acids and derivatives	Carboxylic acids and derivatives	Amino acids, peptides, and analogues
Cyclo(D-Val-L-Pro)	CC(C)C1C(=O)N2CCCC2C(=O)N1	XLUAWXQORJEMBD-UHFFFAOYSA-N	Organic acids and derivatives	Carboxylic acids and derivatives	Amino acids, peptides, and analogues
Cyclo(L-Ala-L-Pro)	CC1C(=O)N2CCCC2C(=O)N1	WSLYCILIEOFQPK-UHFFFAOYSA-N	Organic acids and derivatives	Carboxylic acids and derivatives	Amino acids, peptides, and analogues
Cyclo(L-Leu-trans-4-hydroxy-L-Pro)	CC(C)CC1C(=O)N2CC(CC2C(=O)N1)O	YEHIUWVXPQQDMC-UHFFFAOYSA-N	Organic acids and derivatives	Carboxylic acids and derivatives	Amino acids, peptides, and analogues
Cyclo(L-Phe-trans-4-hydroxy-L-Pro)	C1C(CN2C1C(=O)NC(C2=O)CC3=CC=CC=C3)O	PYQJYHACQOBZLF-UHFFFAOYSA-N	Organic acids and derivatives	Carboxylic acids and derivatives	Amino acids, peptides, and analogues
Cyclo(Pro-Glu)	C1CC2C(=O)NC(C(=O)N2C1)CCC(=O)O	WZUJXVZQPZOEFE-UHFFFAOYSA-N	Organic acids and derivatives	Carboxylic acids and derivatives	Amino acids, peptides, and analogues
Cyclo(Pro-Leu)	CC(C)CC1C(=O)N2CCCC2C(=O)N1	SZJNCZMRZAUNQT-UHFFFAOYSA-N	Organic acids and derivatives	Carboxylic acids and derivatives	Amino acids, peptides, and analogues
Cyclo(Pro-Phe)	C1CC2C(=O)NC(C(=O)N2C1)CC3=CC=CC=C3	QZBUWPVZSXDWSB-UHFFFAOYSA-N	Organic acids and derivatives	Carboxylic acids and derivatives	Amino acids, peptides, and analogues
Cyclo(Pro-Pro)	C1CC2C(=O)N3CCCC3C(=O)N2C1	BKASXWPLSXFART-UHFFFAOYSA-N	Organic acids and derivatives	Carboxylic acids and derivatives	Amino acids, peptides, and analogues
Cyclo(Pro-Val)	CC(C)C1C(=O)N2CCCC2C(=O)N1	XLUAWXQORJEMBD-UHFFFAOYSA-N	Organic acids and derivatives	Carboxylic acids and derivatives	Amino acids, peptides, and analogues
Cyclo(Ser-Pro)	C1CC2C(=O)NC(C(=O)N2C1)CO	AHTDIKDEEMDJGD-UHFFFAOYSA-N	Organic acids and derivatives	Carboxylic acids and derivatives	Amino acids, peptides, and analogues
Cyclo(Tyr-Ala)	CC1C(=O)NC(C(=O)N1)CC2=CC=C(C=C2)O	MFUNIDMQFPXVGU-UHFFFAOYSA-N	Organic acids and derivatives	Carboxylic acids and derivatives	Amino acids, peptides, and analogues
Cys-His-Ala	CC(C(=O)O)NC(=O)C(CC1=CN=CN1)NC(=O)C(CS)N	XVLMKWWVBNESPX-UHFFFAOYSA-N	Organic acids and derivatives	Carboxylic acids and derivatives	Amino acids, peptides, and analogues
D-Proline%20betaine	C[N+]1(CCCC1C(=O)[O-])C	CMUNUTVVOOHQPW-UHFFFAOYSA-N	Organic acids and derivatives	Carboxylic acids and derivatives	Amino acids, peptides, and analogues
DL-O-tyrosine	C1=CC=C(C(=C1)CC(C(=O)O)N)O	WRFPVMFCRNYQNR-UHFFFAOYSA-N	Organic acids and derivatives	Carboxylic acids and derivatives	Amino acids, peptides, and analogues
Gln-Cys-Asp	C(CC(=O)N)C(C(=O)NC(CS)C(=O)NC(CC(=O)O)C(=O)O)N	FJAYYNIXQNERSO-UHFFFAOYSA-N	Organic acids and derivatives	Carboxylic acids and derivatives	Amino acids, peptides, and analogues
Gln-Gly	C(CC(=O)N)C(C(=O)NCC(=O)O)N	JEFZIKRIDLHOIF-UHFFFAOYSA-N	Organic acids and derivatives	Carboxylic acids and derivatives	Amino acids, peptides, and analogues
Gln-Pro-Val	CC(C)C(C(=O)O)NC(=O)C1CCCN1C(=O)C(CCC(=O)N)N	YPFFHGRJCUBXPX-UHFFFAOYSA-N	Organic acids and derivatives	Carboxylic acids and derivatives	Amino acids, peptides, and analogues
Glu-Asn	C(CC(=O)O)C(C(=O)NC(CC(=O)N)C(=O)O)N	TUTIHHSZKFBMHM-UHFFFAOYSA-N	Organic acids and derivatives	Carboxylic acids and derivatives	Amino acids, peptides, and analogues
Glu-Glu-Leu	CC(C)CC(C(=O)O)NC(=O)C(CCC(=O)O)NC(=O)C(CCC(=O)O)N	MUSGDMDGNGXULI-UHFFFAOYSA-N	Organic acids and derivatives	Carboxylic acids and derivatives	Amino acids, peptides, and analogues
Glu-Glu-Phe	C1=CC=C(C=C1)CC(C(=O)O)NC(=O)C(CCC(=O)O)NC(=O)C(CCC(=O)O)N	YLJHCWNDBKKOEB-UHFFFAOYSA-N	Organic acids and derivatives	Carboxylic acids and derivatives	Amino acids, peptides, and analogues
Glu-His	C1=C(NC=N1)CC(C(=O)O)NC(=O)C(CCC(=O)O)N	HKTRDWYCAUTRRL-UHFFFAOYSA-N	Organic acids and derivatives	Carboxylic acids and derivatives	Amino acids, peptides, and analogues
Glu-Ile-Leu	CCC(C)C(C(=O)NC(CC(C)C)C(=O)O)NC(=O)C(CCC(=O)O)N	QXDXIXFSFHUYAX-UHFFFAOYSA-N	Organic acids and derivatives	Carboxylic acids and derivatives	Amino acids, peptides, and analogues
Glu-Leu	CC(C)CC(C(=O)O)NC(=O)C(CCC(=O)O)N	YBAFDPFAUTYYRW-UHFFFAOYSA-N	Organic acids and derivatives	Carboxylic acids and derivatives	Amino acids, peptides, and analogues
Glu-Phe	C1=CC=C(C=C1)CC(C(=O)O)NC(=O)C(CCC(=O)O)N	XMBSYZWANAQXEV-UHFFFAOYSA-N	Organic acids and derivatives	Carboxylic acids and derivatives	Amino acids, peptides, and analogues
Glu-Pro-Leu	CC(C)CC(C(=O)O)NC(=O)C1CCCN1C(=O)C(CCC(=O)O)N	SYWCGQOIIARSIX-UHFFFAOYSA-N	Organic acids and derivatives	Carboxylic acids and derivatives	Amino acids, peptides, and analogues
Glu-Thr-Leu	CC(C)CC(C(=O)O)NC(=O)C(C(C)O)NC(=O)C(CCC(=O)O)N	YQAQQKPWFOBSMU-UHFFFAOYSA-N	Organic acids and derivatives	Carboxylic acids and derivatives	Amino acids, peptides, and analogues
Glu-Val-Ile	CCC(C)C(C(=O)O)NC(=O)C(C(C)C)NC(=O)C(CCC(=O)O)N	FGGKGJHCVMYGCD-UHFFFAOYSA-N	Organic acids and derivatives	Carboxylic acids and derivatives	Amino acids, peptides, and analogues
Glu-Val-Leu	CC(C)CC(C(=O)O)NC(=O)C(C(C)C)NC(=O)C(CCC(=O)O)N	VIPDPMHGICREIS-UHFFFAOYSA-N	Organic acids and derivatives	Carboxylic acids and derivatives	Amino acids, peptides, and analogues
Gly-Glu-Leu	CC(C)CC(C(=O)O)NC(=O)C(CCC(=O)O)NC(=O)CN	YYPFZVIXAVDHIK-UHFFFAOYSA-N	Organic acids and derivatives	Carboxylic acids and derivatives	Amino acids, peptides, and analogues
Gly-Gly-Gln	C(CC(=O)N)C(C(=O)O)NC(=O)CNC(=O)CN	QPTNELDXWKRIFX-UHFFFAOYSA-N	Organic acids and derivatives	Carboxylic acids and derivatives	Amino acids, peptides, and analogues
Gly-Ile	CCC(C)C(C(=O)O)NC(=O)CN	KGVHCTWYMPWEGN-UHFFFAOYSA-N	Organic acids and derivatives	Carboxylic acids and derivatives	Amino acids, peptides, and analogues
Gly-Leu-Val	CC(C)CC(C(=O)NC(C(C)C)C(=O)O)NC(=O)CN	MIIVFRCYJABHTQ-UHFFFAOYSA-N	Organic acids and derivatives	Carboxylic acids and derivatives	Amino acids, peptides, and analogues
Gly-Phe	C1=CC=C(C=C1)CC(C(=O)O)NC(=O)CN	JBCLFWXMTIKCCB-UHFFFAOYSA-N	Organic acids and derivatives	Carboxylic acids and derivatives	Amino acids, peptides, and analogues
Gly-Phe-Glu	C1=CC=C(C=C1)CC(C(=O)NC(CCC(=O)O)C(=O)O)NC(=O)CN	WZSHYFGOLPXPLL-UHFFFAOYSA-N	Organic acids and derivatives	Carboxylic acids and derivatives	Amino acids, peptides, and analogues
Gly-Pro	C1CC(N(C1)C(=O)CN)C(=O)O	KZNQNBZMBZJQJO-UHFFFAOYSA-N	Organic acids and derivatives	Carboxylic acids and derivatives	Amino acids, peptides, and analogues
Gly-Thr-Gly	CC(C(C(=O)NCC(=O)O)NC(=O)CN)O	JQFILXICXLDTRR-UHFFFAOYSA-N	Organic acids and derivatives	Carboxylic acids and derivatives	Amino acids, peptides, and analogues
Gly-Tyr-Arg	C1=CC(=CC=C1CC(C(=O)NC(CCCN=C(N)N)C(=O)O)NC(=O)CN)O	GWNIGUKSRJBIHX-UHFFFAOYSA-N	Organic acids and derivatives	Carboxylic acids and derivatives	Amino acids, peptides, and analogues
Gly-Val-Ala	CC(C)C(C(=O)NC(C)C(=O)O)NC(=O)CN	GWCJMBNBFYBQCV-UHFFFAOYSA-N	Organic acids and derivatives	Carboxylic acids and derivatives	Amino acids, peptides, and analogues
Gly-Val-Leu	CC(C)CC(C(=O)O)NC(=O)C(C(C)C)NC(=O)CN	BAYQNCWLXIDLHX-UHFFFAOYSA-N	Organic acids and derivatives	Carboxylic acids and derivatives	Amino acids, peptides, and analogues
Gly-Val-Phe	CC(C)C(C(=O)NC(CC1=CC=CC=C1)C(=O)O)NC(=O)CN	BNMRSWQOHIQTFL-UHFFFAOYSA-N	Organic acids and derivatives	Carboxylic acids and derivatives	Amino acids, peptides, and analogues
H-Gly-ala-phe-OH	CC(C(=O)NC(CC1=CC=CC=C1)C(=O)O)NC(=O)CN	MZZSCEANQDPJER-UHFFFAOYSA-N	Organic acids and derivatives	Carboxylic acids and derivatives	Amino acids, peptides, and analogues
His-Asp-Leu	CC(C)CC(C(=O)O)NC(=O)C(CC(=O)O)NC(=O)C(CC1=CN=CN1)N	UOAVQQRILDGZEN-UHFFFAOYSA-N	Organic acids and derivatives	Carboxylic acids and derivatives	Amino acids, peptides, and analogues
His-Tyr	C1=CC(=CC=C1CC(C(=O)O)NC(=O)C(CC2=CN=CN2)N)O	HTOOKGDPMXSJSY-UHFFFAOYSA-N	Organic acids and derivatives	Carboxylic acids and derivatives	Amino acids, peptides, and analogues
Ile-Ala	CCC(C)C(C(=O)NC(C)C(=O)O)N	RCFDOSNHHZGBOY-UHFFFAOYSA-N	Organic acids and derivatives	Carboxylic acids and derivatives	Amino acids, peptides, and analogues
Ile-Asn	CCC(C)C(C(=O)NC(CC(=O)N)C(=O)O)N	HZYHBDVRCBDJJV-UHFFFAOYSA-N	Organic acids and derivatives	Carboxylic acids and derivatives	Amino acids, peptides, and analogues
Ile-Asp	CCC(C)C(C(=O)NC(CC(=O)O)C(=O)O)N	WKXVAXOSIPTXEC-UHFFFAOYSA-N	Organic acids and derivatives	Carboxylic acids and derivatives	Amino acids, peptides, and analogues
Ile-Asp-Leu	CCC(C)C(C(=O)NC(CC(=O)O)C(=O)NC(CC(C)C)C(=O)O)N	RGSOCXHDOPQREB-UHFFFAOYSA-N	Organic acids and derivatives	Carboxylic acids and derivatives	Amino acids, peptides, and analogues
Ile-Cys-Arg	CCC(C)C(C(=O)NC(CS)C(=O)NC(CCCN=C(N)N)C(=O)O)N	SJIGTGZVQGLMGG-UHFFFAOYSA-N	Organic acids and derivatives	Carboxylic acids and derivatives	Amino acids, peptides, and analogues
Ile-Glu-Val	CCC(C)C(C(=O)NC(CCC(=O)O)C(=O)NC(C(C)C)C(=O)O)N	WUKLZPHVWAMZQV-UHFFFAOYSA-N	Organic acids and derivatives	Carboxylic acids and derivatives	Amino acids, peptides, and analogues
Ile-Gly-Ile	CCC(C)C(C(=O)NCC(=O)NC(C(C)CC)C(=O)O)N	MQFGXJNSUJTXDT-UHFFFAOYSA-N	Organic acids and derivatives	Carboxylic acids and derivatives	Amino acids, peptides, and analogues
Ile-Gly-Val	CCC(C)C(C(=O)NCC(=O)NC(C(C)C)C(=O)O)N	VOBYAKCXGQQFLR-UHFFFAOYSA-N	Organic acids and derivatives	Carboxylic acids and derivatives	Amino acids, peptides, and analogues
Ile-His	CCC(C)C(C(=O)NC(CC1=CN=CN1)C(=O)O)N	QNBYCZTZNOVDMI-UHFFFAOYSA-N	Organic acids and derivatives	Carboxylic acids and derivatives	Amino acids, peptides, and analogues
Ile-Phe	CCC(C)C(C(=O)NC(CC1=CC=CC=C1)C(=O)O)N	WMDZARSFSMZOQO-UHFFFAOYSA-N	Organic acids and derivatives	Carboxylic acids and derivatives	Amino acids, peptides, and analogues
Ile-Phe-Gly	CCC(C)C(C(=O)NC(CC1=CC=CC=C1)C(=O)NCC(=O)O)N	UAELWXJFLZBKQS-UHFFFAOYSA-N	Organic acids and derivatives	Carboxylic acids and derivatives	Amino acids, peptides, and analogues
Ile-Pro-Gln	CCC(C)C(C(=O)N1CCCC1C(=O)NC(CCC(=O)N)C(=O)O)N	BATWGBRIZANGPN-UHFFFAOYSA-N	Organic acids and derivatives	Carboxylic acids and derivatives	Amino acids, peptides, and analogues
Ile-Thr-Cys	CCC(C)C(C(=O)NC(C(C)O)C(=O)NC(CS)C(=O)O)N	RKQAYOWLSFLJEE-UHFFFAOYSA-N	Organic acids and derivatives	Carboxylic acids and derivatives	Amino acids, peptides, and analogues
Ile-Trp	CCC(C)C(C(=O)NC(CC1=CNC2=CC=CC=C21)C(=O)O)N	BVRPESWOSNFUCJ-UHFFFAOYSA-N	Organic acids and derivatives	Carboxylic acids and derivatives	Amino acids, peptides, and analogues
Ile-Val-Gly	CCC(C)C(C(=O)NC(C(C)C)C(=O)NCC(=O)O)N	KXUKTDGKLAOCQK-UHFFFAOYSA-N	Organic acids and derivatives	Carboxylic acids and derivatives	Amino acids, peptides, and analogues
Kyotorphin	C1=CC(=CC=C1CC(C(=O)NC(CCCN=C(N)N)C(=O)O)N)O	JXNRXNCCROJZFB-UHFFFAOYSA-N	Organic acids and derivatives	Carboxylic acids and derivatives	Amino acids, peptides, and analogues
L-Cyclopentylglycine	C1CCC(C1)C(C(=O)O)N	XBPKRVHTESHFAA-UHFFFAOYSA-N	Organic acids and derivatives	Carboxylic acids and derivatives	Amino acids, peptides, and analogues
L-Homonorleucine	CCCCCC(C(=O)O)N	RDFMDVXONNIGBC-UHFFFAOYSA-N	Organic acids and derivatives	Carboxylic acids and derivatives	Amino acids, peptides, and analogues
L-threo-3-Methylaspartate	CC(C(C(=O)O)N)C(=O)O	LXRUAYBIUSUULX-UHFFFAOYSA-N	Organic acids and derivatives	Carboxylic acids and derivatives	Amino acids, peptides, and analogues
Leu-Ala-Ile	CCC(C)C(C(=O)O)NC(=O)C(C)NC(=O)C(CC(C)C)N	QPRQGENIBFLVEB-UHFFFAOYSA-N	Organic acids and derivatives	Carboxylic acids and derivatives	Amino acids, peptides, and analogues
Leu-Ala-Leu	CC(C)CC(C(=O)NC(C)C(=O)NC(CC(C)C)C(=O)O)N	LSPYFSHXDAYVDI-UHFFFAOYSA-N	Organic acids and derivatives	Carboxylic acids and derivatives	Amino acids, peptides, and analogues
Leu-Arg	CC(C)CC(C(=O)NC(CCCN=C(N)N)C(=O)O)N	SENJXOPIZNYLHU-UHFFFAOYSA-N	Organic acids and derivatives	Carboxylic acids and derivatives	Amino acids, peptides, and analogues
Leu-Asn-His	CC(C)CC(C(=O)NC(CC(=O)N)C(=O)NC(CC1=CN=CN1)C(=O)O)N	VIWUBXKCYJGNCL-UHFFFAOYSA-N	Organic acids and derivatives	Carboxylic acids and derivatives	Amino acids, peptides, and analogues
Leu-Asp	CC(C)CC(C(=O)NC(CC(=O)O)C(=O)O)N	DVCSNHXRZUVYAM-UHFFFAOYSA-N	Organic acids and derivatives	Carboxylic acids and derivatives	Amino acids, peptides, and analogues
Leu-Asp-Lys	CC(C)CC(C(=O)NC(CC(=O)O)C(=O)NC(CCCCN)C(=O)O)N	MYGQXVYRZMKRDB-UHFFFAOYSA-N	Organic acids and derivatives	Carboxylic acids and derivatives	Amino acids, peptides, and analogues
Leu-Glu-Phe	CC(C)CC(C(=O)NC(CCC(=O)O)C(=O)NC(CC1=CC=CC=C1)C(=O)O)N	LAGPXKYZCCTSGQ-UHFFFAOYSA-N	Organic acids and derivatives	Carboxylic acids and derivatives	Amino acids, peptides, and analogues
Leu-Glu-Val	CC(C)CC(C(=O)NC(CCC(=O)O)C(=O)NC(C(C)C)C(=O)O)N	HVJVUYQWFYMGJS-UHFFFAOYSA-N	Organic acids and derivatives	Carboxylic acids and derivatives	Amino acids, peptides, and analogues
Leu-Ile-Gln	CCC(C)C(C(=O)NC(CCC(=O)N)C(=O)O)NC(=O)C(CC(C)C)N	AUBMZAMQCOYSIC-UHFFFAOYSA-N	Organic acids and derivatives	Carboxylic acids and derivatives	Amino acids, peptides, and analogues
Leu-Ile-Glu	CCC(C)C(C(=O)NC(CCC(=O)O)C(=O)O)NC(=O)C(CC(C)C)N	HGFGEMSVBMCFKK-UHFFFAOYSA-N	Organic acids and derivatives	Carboxylic acids and derivatives	Amino acids, peptides, and analogues
Leu-Phe	CC(C)CC(C(=O)NC(CC1=CC=CC=C1)C(=O)O)N	KFKWRHQBZQICHA-UHFFFAOYSA-N	Organic acids and derivatives	Carboxylic acids and derivatives	Amino acids, peptides, and analogues
Leu-Pro-Tyr	CC(C)CC(C(=O)N1CCCC1C(=O)NC(CC2=CC=C(C=C2)O)C(=O)O)N	UCXQIIIFOOGYEM-UHFFFAOYSA-N	Organic acids and derivatives	Carboxylic acids and derivatives	Amino acids, peptides, and analogues
Leu-Ser-Ile	CCC(C)C(C(=O)O)NC(=O)C(CO)NC(=O)C(CC(C)C)N	MVHXGBZUJLWZOH-UHFFFAOYSA-N	Organic acids and derivatives	Carboxylic acids and derivatives	Amino acids, peptides, and analogues
Leu-Thr-Ala	CC(C)CC(C(=O)NC(C(C)O)C(=O)NC(C)C(=O)O)N	ZJZNLRVCZWUONM-UHFFFAOYSA-N	Organic acids and derivatives	Carboxylic acids and derivatives	Amino acids, peptides, and analogues
Leu-Val	CC(C)CC(C(=O)NC(C(C)C)C(=O)O)N	MDSUKZSLOATHMH-UHFFFAOYSA-N	Organic acids and derivatives	Carboxylic acids and derivatives	Amino acids, peptides, and analogues
Leu-Val-Leu	CC(C)CC(C(=O)NC(C(C)C)C(=O)NC(CC(C)C)C(=O)O)N	FPPCCQGECVKLDY-UHFFFAOYSA-N	Organic acids and derivatives	Carboxylic acids and derivatives	Amino acids, peptides, and analogues
Leu-Val-Phe	CC(C)CC(C(=O)NC(C(C)C)C(=O)NC(CC1=CC=CC=C1)C(=O)O)N	XOEDPXDZJHBQIX-UHFFFAOYSA-N	Organic acids and derivatives	Carboxylic acids and derivatives	Amino acids, peptides, and analogues
Lys-Ala	CC(C(=O)O)NC(=O)C(CCCCN)N	QOOWRKBDDXQRHC-UHFFFAOYSA-N	Organic acids and derivatives	Carboxylic acids and derivatives	Amino acids, peptides, and analogues
Lys-Asn	C(CCN)CC(C(=O)NC(CC(=O)N)C(=O)O)N	JPNRPAJITHRXRH-UHFFFAOYSA-N	Organic acids and derivatives	Carboxylic acids and derivatives	Amino acids, peptides, and analogues
Lys-Asp	C(CCN)CC(C(=O)NC(CC(=O)O)C(=O)O)N	CIOWSLJGLSUOME-UHFFFAOYSA-N	Organic acids and derivatives	Carboxylic acids and derivatives	Amino acids, peptides, and analogues
Lys-Glu-Gly	C(CCN)CC(C(=O)NC(CCC(=O)O)C(=O)NCC(=O)O)N	GCMWRRQAKQXDED-UHFFFAOYSA-N	Organic acids and derivatives	Carboxylic acids and derivatives	Amino acids, peptides, and analogues
Lys-Gly	C(CCN)CC(C(=O)NCC(=O)O)N	HGNRJCINZYHNOU-UHFFFAOYSA-N	Organic acids and derivatives	Carboxylic acids and derivatives	Amino acids, peptides, and analogues
Lys-Phe	C1=CC=C(C=C1)CC(C(=O)O)NC(=O)C(CCCCN)N	QCZYYEFXOBKCNQ-UHFFFAOYSA-N	Organic acids and derivatives	Carboxylic acids and derivatives	Amino acids, peptides, and analogues
Lys-Pro-Ile	CCC(C)C(C(=O)O)NC(=O)C1CCCN1C(=O)C(CCCCN)N	QBHGXFQJFPWJIH-UHFFFAOYSA-N	Organic acids and derivatives	Carboxylic acids and derivatives	Amino acids, peptides, and analogues
Lys-Thr	CC(C(C(=O)O)NC(=O)C(CCCCN)N)O	ZOKVLMBYDSIDKG-UHFFFAOYSA-N	Organic acids and derivatives	Carboxylic acids and derivatives	Amino acids, peptides, and analogues
Lys-Tyr	C1=CC(=CC=C1CC(C(=O)O)NC(=O)C(CCCCN)N)O	MYTOTTSMVMWVJN-UHFFFAOYSA-N	Organic acids and derivatives	Carboxylic acids and derivatives	Amino acids, peptides, and analogues
Met-Asn	CSCCC(C(=O)NC(CC(=O)N)C(=O)O)N	JMEWFDUAFKVAAT-UHFFFAOYSA-N	Organic acids and derivatives	Carboxylic acids and derivatives	Amino acids, peptides, and analogues
Met-Ser	CSCCC(C(=O)NC(CO)C(=O)O)N	WEDDFMCSUNNZJR-UHFFFAOYSA-N	Organic acids and derivatives	Carboxylic acids and derivatives	Amino acids, peptides, and analogues
Met-Thr	CC(C(C(=O)O)NC(=O)C(CCSC)N)O	KAKJTZWHIUWTTD-UHFFFAOYSA-N	Organic acids and derivatives	Carboxylic acids and derivatives	Amino acids, peptides, and analogues
N-(1-Deoxy-1-fructosyl)Leucine	CC(C)CC(C(=O)O)NCC1(C(C(C(O1)CO)O)O)O	KGTRBDVOUPALMB-UHFFFAOYSA-N	Organic acids and derivatives	Carboxylic acids and derivatives	Amino acids, peptides, and analogues
N-(1-Deoxy-1-fructosyl)Phenylalanine	C1=CC=C(C=C1)CC(C(=O)O)NCC2(C(C(C(O2)CO)O)O)O	FAVRCIXPIVJIPN-UHFFFAOYSA-N	Organic acids and derivatives	Carboxylic acids and derivatives	Amino acids, peptides, and analogues
N-(1-Deoxy-1-fructosyl)Proline	C1CC(N(C1)CC2(C(C(C(O2)CO)O)O)O)C(=O)O	GSFRYAKUDPPHHG-UHFFFAOYSA-N	Organic acids and derivatives	Carboxylic acids and derivatives	Amino acids, peptides, and analogues
N-(1-Deoxy-1-fructosyl)Tyrosine	C1=CC(=CC=C1CC(C(=O)O)NCC2(C(C(C(O2)CO)O)O)O)O	QLJKHQIODQKMNW-UHFFFAOYSA-N	Organic acids and derivatives	Carboxylic acids and derivatives	Amino acids, peptides, and analogues
N-(1-Deoxy-1-fructosyl)Valine	CC(C)C(C(=O)O)NCC1(C(C(C(O1)CO)O)O)O	OANCGDPJMNPBDV-UHFFFAOYSA-N	Organic acids and derivatives	Carboxylic acids and derivatives	Amino acids, peptides, and analogues
N-Alpha-Acetyl-L-Asparagine	CC(=O)NC(CC(=O)N)C(=O)O	HXFOXFJUNFFYMO-UHFFFAOYSA-N	Organic acids and derivatives	Carboxylic acids and derivatives	Amino acids, peptides, and analogues
N-Ethylmaleimide%20(NEM)	CCN1C(=O)C=CC1=O	HDFGOPSGAURCEO-UHFFFAOYSA-N	Organoheterocyclic compounds	Pyrrolidines	Pyrrolidones
N-carbamoyl-b-alanine	C(CNC(=O)N)C(=O)O	JSJWCHRYRHKBBW-UHFFFAOYSA-N	Organic acids and derivatives	Organic carbonic acids and derivatives	Ureas
N-trans-p-Coumaroyltyrosine	C1=CC(=CC=C1CC(C(=O)O)NC(=O)C=CC2=CC=C(C=C2)O)O	LEEDEKWKJVUWGA-UHFFFAOYSA-N	Organic acids and derivatives	Carboxylic acids and derivatives	Amino acids, peptides, and analogues
NG,NG-Dimethyl-L-arginine	CN(C)C(=NCCCC(C(=O)O)N)N	YDGMGEXADBMOMJ-UHFFFAOYSA-N	Organic acids and derivatives	Carboxylic acids and derivatives	Amino acids, peptides, and analogues
Oxiglutatione	C(CC(=O)NC(CSSCC(C(=O)NCC(=O)O)NC(=O)CCC(C(=O)O)N)C(=O)NCC(=O)O)C(C(=O)O)N	YPZRWBKMTBYPTK-UHFFFAOYSA-N	Organic acids and derivatives	Carboxylic acids and derivatives	Amino acids, peptides, and analogues
Phe-Ala	CC(C(=O)O)NC(=O)C(CC1=CC=CC=C1)N	MIDZLCFIAINOQN-UHFFFAOYSA-N	Organic acids and derivatives	Carboxylic acids and derivatives	Amino acids, peptides, and analogues
Phe-Asp-Ala	CC(C(=O)O)NC(=O)C(CC(=O)O)NC(=O)C(CC1=CC=CC=C1)N	LDSOBEJVGGVWGD-UHFFFAOYSA-N	Organic acids and derivatives	Carboxylic acids and derivatives	Amino acids, peptides, and analogues
Phe-Gln	C1=CC=C(C=C1)CC(C(=O)NC(CCC(=O)N)C(=O)O)N	KLAONOISLHWJEE-UHFFFAOYSA-N	Organic acids and derivatives	Carboxylic acids and derivatives	Amino acids, peptides, and analogues
Phe-Gly-Arg	C1=CC=C(C=C1)CC(C(=O)NCC(=O)NC(CCCN=C(N)N)C(=O)O)N	RFEXGCASCQGGHZ-UHFFFAOYSA-N	Organic acids and derivatives	Carboxylic acids and derivatives	Amino acids, peptides, and analogues
Phe-Gly-Gly	C1=CC=C(C=C1)CC(C(=O)NCC(=O)NCC(=O)O)N	NAXPHWZXEXNDIW-UHFFFAOYSA-N	Organic acids and derivatives	Carboxylic acids and derivatives	Amino acids, peptides, and analogues
Phe-His	C1=CC=C(C=C1)CC(C(=O)NC(CC2=CN=CN2)C(=O)O)N	OHUXOEXBXPZKPT-UHFFFAOYSA-N	Organic acids and derivatives	Carboxylic acids and derivatives	Amino acids, peptides, and analogues
Phe-Hyp	C1C(CN(C1C(=O)O)C(=O)C(CC2=CC=CC=C2)N)O	WJSNJMXOBDSZDL-UHFFFAOYSA-N	Organic acids and derivatives	Carboxylic acids and derivatives	Amino acids, peptides, and analogues
Phe-Ile	CCC(C)C(C(=O)O)NC(=O)C(CC1=CC=CC=C1)N	JWBLQDDHSDGEGR-UHFFFAOYSA-N	Organic acids and derivatives	Carboxylic acids and derivatives	Amino acids, peptides, and analogues
Phe-Ser-Ser	C1=CC=C(C=C1)CC(C(=O)NC(CO)C(=O)NC(CO)C(=O)O)N	MCIXMYKSPQUMJG-UHFFFAOYSA-N	Organic acids and derivatives	Carboxylic acids and derivatives	Amino acids, peptides, and analogues
Phe-Trp	C1=CC=C(C=C1)CC(C(=O)NC(CC2=CNC3=CC=CC=C32)C(=O)O)N	JMCOUWKXLXDERB-UHFFFAOYSA-N	Organic acids and derivatives	Carboxylic acids and derivatives	Amino acids, peptides, and analogues
Pro-Asn-Leu	CC(C)CC(C(=O)O)NC(=O)C(CC(=O)N)NC(=O)C1CCCN1	AMBLXEMWFARNNQ-UHFFFAOYSA-N	Organic acids and derivatives	Carboxylic acids and derivatives	Amino acids, peptides, and analogues
Pro-Asp-Glu	C1CC(NC1)C(=O)NC(CC(=O)O)C(=O)NC(CCC(=O)O)C(=O)O	VJLJGKQAOQJXJG-UHFFFAOYSA-N	Organic acids and derivatives	Carboxylic acids and derivatives	Amino acids, peptides, and analogues
Pro-Glu-His	C1CC(NC1)C(=O)NC(CCC(=O)O)C(=O)NC(CC2=CN=CN2)C(=O)O	VPFGPKIWSDVTOY-UHFFFAOYSA-N	Organic acids and derivatives	Carboxylic acids and derivatives	Amino acids, peptides, and analogues
Pro-Glu-Ile	CCC(C)C(C(=O)O)NC(=O)C(CCC(=O)O)NC(=O)C1CCCN1	WVOXLKUUVCCCSU-UHFFFAOYSA-N	Organic acids and derivatives	Carboxylic acids and derivatives	Amino acids, peptides, and analogues
Pro-Gly-Leu	CC(C)CC(C(=O)O)NC(=O)CNC(=O)C1CCCN1	FKLSMYYLJHYPHH-UHFFFAOYSA-N	Organic acids and derivatives	Carboxylic acids and derivatives	Amino acids, peptides, and analogues
Pro-Gly-Phe	C1CC(NC1)C(=O)NCC(=O)NC(CC2=CC=CC=C2)C(=O)O	XQSREVQDGCPFRJ-UHFFFAOYSA-N	Organic acids and derivatives	Carboxylic acids and derivatives	Amino acids, peptides, and analogues
Pro-His-Glu	C1CC(NC1)C(=O)NC(CC2=CN=CN2)C(=O)NC(CCC(=O)O)C(=O)O	AJCRQOHDLCBHFA-UHFFFAOYSA-N	Organic acids and derivatives	Carboxylic acids and derivatives	Amino acids, peptides, and analogues
Pro-Ile	CCC(C)C(C(=O)O)NC(=O)C1CCCN1	OCYROESYHWUPBP-UHFFFAOYSA-N	Organic acids and derivatives	Carboxylic acids and derivatives	Amino acids, peptides, and analogues
Trp-Gln	C1=CC=C2C(=C1)C(=CN2)CC(C(=O)NC(CCC(=O)N)C(=O)O)N	NZCPCJCJZHKFGZ-UHFFFAOYSA-N	Organic acids and derivatives	Carboxylic acids and derivatives	Amino acids, peptides, and analogues
Benzoyleneurea	O=c1[nH]c(=O)c2ccccc2[nH]1	SDQJTWBNWQABLE-UHFFFAOYSA-N	Organoheterocyclic compounds	Diazanaphthalenes	Benzodiazines
Betaine	C[N+](C)(C)CC(=O)[O-]	KWIUHFFTVRNATP-UHFFFAOYSA-N	Organic acids and derivatives	Carboxylic acids and derivatives	Amino acids, peptides, and analogues
Sinapine	COc1cc(/C=C/C(=O)OCC[N+](C)(C)C)cc(OC)c1O	HUJXHFRXWWGYQH-UHFFFAOYSA-O	Phenylpropanoids and polyketides	Cinnamic acids and derivatives	Hydroxycinnamic acids and derivatives
Glu-Phe-Ala	C[C@H](NC(=O)[C@H](Cc1ccccc1)NC(=O)[C@@H](N)CCC(=O)O)C(=O)O	PMSMKNYRZCKVMC-DRZSPHRISA-N	Organic acids and derivatives	Carboxylic acids and derivatives	Amino acids, peptides, and analogues
Glu-Phe-Leu	CC(C)C[C@H](NC(=O)[C@H](Cc1ccccc1)NC(=O)[C@@H](N)CCC(=O)O)C(=O)O	QNJNPKSWAHPYGI-JYJNAYRXSA-N	Organic acids and derivatives	Carboxylic acids and derivatives	Amino acids, peptides, and analogues
3?-Isodihydrocadambine%204-oxide	COC(=O)C1=CO[C@H]([C@H]2[C@@H]1C[C@@H]3C4=C(CC[N+]3([C@H]2CO)[O-])C5=CC=CC=C5N4)O[C@H]6[C@@H]([C@H]([C@@H]([C@H](O6)CO)O)O)O	NVUHVENKCFNJQW-HQWJPQCSSA-N	Alkaloids and derivatives	Yohimbine alkaloids	Unassigned
Phe-Val-Asp	CC(C)[C@H](NC(=O)[C@@H](N)Cc1ccccc1)C(=O)N[C@@H](CC(=O)O)C(=O)O	JSGWNFKWZNPDAV-YDHLFZDLSA-N	Organic acids and derivatives	Carboxylic acids and derivatives	Amino acids, peptides, and analogues
Teupolioside	C[C@@H]1O[C@@H](O[C@@H]2[C@@H](O)[C@H](OCCc3ccc(O)c(O)c3)O[C@H](CO)[C@H]2OC(=O)/C=C/c2ccc(O)c(O)c2)[C@H](O[C@@H]2O[C@H](CO)[C@H](O)[C@H](O)[C@H]2O)[C@H](O)[C@H]1O	SDRRSTAVRUERNC-GUTOYVNHSA-N	Organic oxygen compounds	Organooxygen compounds	Carbohydrates and carbohydrate conjugates
Dihydrokaempferide	COc1ccc([C@H]2Oc3cc(O)cc(O)c3C(=O)[C@@H]2O)cc1	CKDYDMSDCNQHEB-JKSUJKDBSA-N	Phenylpropanoids and polyketides	Flavonoids	O-methylated flavonoids
Pinolenic%20acid	CCCCC/C=C\C/C=C\CC/C=C\CCCC(=O)O	HXQHFNIKBKZGRP-URPRIDOGSA-N	Lipids and lipid-like molecules	Fatty Acyls	Lineolic acids and derivatives
3,5-Dihydroxy-4-methoxybenzoic%20acid;%204-O-Methylgallic%20Acid	COC1=C(C=C(C(=O)O)C=C1O)O.OC=1C=C(C(=O)O)C=C(C1OC)O	OCWZADZEEYIAIA-UHFFFAOYSA-N	Benzenoids	Benzene and substituted derivatives	Benzoic acids and derivatives
Isoscopoletin%20(6-Hydroxy-7-Methoxycoumarin)	COC1=C(C=C2C=CC(=O)OC2=C1)O	SYTYLPHCLSSCOJ-UHFFFAOYSA-N	Phenylpropanoids and polyketides	Coumarins and derivatives	Hydroxycoumarins
Desrhamnosylisoacteoside	O=C(/C=C/c1ccc(O)c(O)c1)OC[C@H]1O[C@@H](OCCc2ccc(O)c(O)c2)[C@H](O)[C@@H](O)[C@@H]1O	LFKQVVDFNHDYNK-FOXCETOMSA-N	Phenylpropanoids and polyketides	Cinnamic acids and derivatives	Hydroxycinnamic acids and derivatives
Kobusone	CC1(C)C[C@@H]2C(=O)CC[C@H]3O[C@]3(C)CC[C@H]21	UETZJEZFLKASPR-UZWIWUQPSA-N	Organic oxygen compounds	Organooxygen compounds	Carbonyl compounds
Ligucyperonol	C=C(C)[C@@H]1CC[C@]2(C)C(=C(C)C(=O)C[C@H]2O)C1	MROVETGJOLYNJI-KCPJHIHWSA-N	Lipids and lipid-like molecules	Prenol lipids	Sesquiterpenoids
Rubiarbonone%20E	CC(C)[C@@H]1C[C@@H](O)[C@H]2[C@@]1(CO)CC[C@@]1(C)[C@H]3C(=CC[C@]21C)[C@@]1(C)C=CC(=O)C(C)(C)[C@@H]1C[C@@H]3O	LKBSFVITHXLCDA-MEKJSECDSA-N	Lipids and lipid-like molecules	Prenol lipids	Triterpenoids
Rubiatriol	CC(C)[C@H]1C[C@@H](O)[C@@H]2[C@]1(C)CC[C@]1(C)[C@@H]3C(=CC[C@@]21C)[C@@]1(C)CC[C@H](O)C(C)(C)[C@@H]1C[C@H]3O	PZBGHZIQCYOWLL-GJOOHKEJSA-N	Lipids and lipid-like molecules	Prenol lipids	Triterpenoids
2,6-Dimethoxy-4-hydroxyphenol-1-O-ß-D-glucopyranoside	COc1cc(O)cc(OC)c1O[C@@H]1O[C@H](CO)[C@@H](O)[C@H](O)[C@H]1O	NOQYJICHFNSIFZ-DIACKHNESA-N	Organic oxygen compounds	Organooxygen compounds	Carbohydrates and carbohydrate conjugates
1',2',3',4'-tetrahydro-5'-deoxypinnatanine
Nortrachelogenin-4'-O-gentiobioside	COC1=C(C=CC(=C1)C[C@H]2COC(=O)[C@@]2(CC3=CC(=C(C=C3)O[C@H]4[C@@H]([C@H]([C@@H]([C@H](O4)CO[C@H]5[C@@H]([C@H]([C@@H]([C@H](O5)CO)O)O)O)O)O)O)OC)O)O	PYMWBOXBOZRSHG-HLGCWGIDSA-N	Lignans, neolignans and related compounds	Furanoid lignans	Tetrahydrofuran lignans
Canadine;%20Tetrahydroberberine	COC1=C(C2=C(CC3C4=CC5=C(C=C4CCN3C2)OCO5)C=C1)OC	VZTUIEROBZXUFA-UHFFFAOYSA-N	Alkaloids and derivatives	Protoberberine alkaloids and derivatives	Unassigned
Adirubine	CCC1CN2C(CC1C(CO)C(=O)OC)C3=C(CC2C(=O)O)C4=CC=CC=C4N3	YEEKWMLONOHGDC-SYNPIVBESA-N	Alkaloids and derivatives	Corynanthean-type alkaloids	Unassigned
BOA-6-O-glucoside	C1=CC2=C(C=C1O[C@H]3[C@@H]([C@H]([C@@H]([C@H](O3)CO)O)O)O)OC(=O)N2	BCWUFYWJGPPYJP-RMPHRYRLSA-N	Organic oxygen compounds	Organooxygen compounds	Carbohydrates and carbohydrate conjugates
Canthin-4-one	C1=CC=C2C(=C1)C3=C4N2C=CC(=O)C4=NC=C3	UXQYDMZJLNAAPQ-UHFFFAOYSA-N	Alkaloids and derivatives	Indolonaphthyridine alkaloids	Unassigned
Hydroxymenisdaurin%20D
N-Benzylmethylene%20isomethylamine
Tatarine
naphthisoxazol%20A
4-hydroxyquinoline	C1=CC=C2C(=C1)C(=O)C=CN2	PMZDQRJGMBOQBF-UHFFFAOYSA-N	Organoheterocyclic compounds	Quinolines and derivatives	Quinolones and derivatives
N-Methyltryptamine	CNCCC1=CNC2=CC=CC=C21	NCIKQJBVUNUXLW-UHFFFAOYSA-N	Organoheterocyclic compounds	Indoles and derivatives	Tryptamines and derivatives
Quininic%20acid;%206-Methoxyquinoline-4-Carboxylic%20Acid	COC1=CC2=C(C=CN=C2C=C1)C(=O)O	XXLFLUJXWKXUGS-UHFFFAOYSA-N	Organoheterocyclic compounds	Quinolines and derivatives	Quinoline carboxylic acids
Caffeoylspermidineglucoside
N'-p-Coumaroylagmatine-glucoside
N1-Caffeoyl-N10-dihydrocaffeoylspermidine
gamma-Glutamyl%20tyramine	C1=CC(=CC=C1CCN[C@@H](CCC(=O)N)C(=O)O)O	HSYMWRKZTLQPMR-NSHDSACASA-N	Organic acids and derivatives	Carboxylic acids and derivatives	Amino acids, peptides, and analogues
Dihydro-N-methylisopelletierine
Dihydroisopelletierine
1-Acetyl-beta-carboline	CC(=O)C1=NC=CC2=C1NC3=CC=CC=C23	NXZSUJKPVSDFNF-UHFFFAOYSA-N	Alkaloids and derivatives	Harmala alkaloids	Unassigned
1-Methyl-1,2,3,4-tetrahydro-?-carboline-3-carboxylic%20acid
18,19-Hydroxyvincosamide
2'-O-Glucosyl-11-hydroxy%20vincoside%20lactam
2'-O-?-D-glucopyranosyl-11-hydroxyvincoside%20lactam
22-O-Demethyl-22-O-glucosyl%20isocorynoxeine
3-Dihydrocadambine	COC(=O)C1=CO[C@H]([C@H]2[C@@H]1C[C@H]3C4=C(CCN3C[C@H]2O)C5=CC=CC=C5N4)O[C@H]6[C@@H]([C@H]([C@@H]([C@H](O6)CO)O)O)O	HNZGKRAKJFZQAY-SBAWYOAKSA-N	Organoheterocyclic compounds	Indoles and derivatives	Pyridoindoles
Acetoxyindole%20N-Glucoside
Ajmalicine	CC1C2CN3CCC4=C(C3CC2C(=CO1)C(=O)OC)NC5=CC=CC=C45	GRTOGORTSDXSFK-XJTZBENFSA-N	Alkaloids and derivatives	Yohimbine alkaloids	Unassigned
Ammocalline
Gambireine	CO/C=C(\[C@H]1C[C@H]2C3=C(CCN2CC1C=C)C4=C(N3)C=CC=C4O)/C(=O)OC	YLQUEZKRWSZMBS-WODHOCRQSA-N	Alkaloids and derivatives	Corynanthean-type alkaloids	Unassigned
Met-Phe	CSCCC(N)C(=O)NC(Cc1ccccc1)C(=O)O.CSCC[C@H](N)C(=O)N[C@@H](Cc1ccccc1)C(=O)O	PCKIYGYNYHGKGS-FXMYHANSSA-N	Organic acids and derivatives	Carboxylic acids and derivatives	Amino acids, peptides, and analogues
Isogambirine	CCC1CN2CCC3=C([C@@H]2C[C@@H]1/C(=C\OC)/C(=O)OC)NC4=C3C=C(C=C4)O	VVFNDHBLDUVXPL-PMXBJBEESA-N	Alkaloids and derivatives	Corynanthean-type alkaloids	Unassigned
Rhynchophyllionium%20A
Rhynchophyllionium%20B
Rhynchophylloside%20C
Rhynchophylloside%20D
Rhynchophylloside%20K
Rhynchophylloside%20L
Uncarialin%20C
Uncarialin%20J
isoindygo
Beta-Carboline-1-propanoic%20acid	C1=CC=C2C(=C1)C3=C(N2)C(=NC=C3)CCC(=O)O	CNUHEVWYPKFJHH-UHFFFAOYSA-N	Alkaloids and derivatives	Harmala alkaloids	Unassigned
3-pyridine-methanol-O-?-D-glucopyranosyl
L-Isoleucyl-L-Aspartate	N[C@@H]([C@@H](C)CC)C(=O)N[C@@H](CC(=O)[O-])C(=O)[O-]	WKXVAXOSIPTXEC-HAFWLYHUSA-L	Organic acids and derivatives	Carboxylic acids and derivatives	Amino acids, peptides, and analogues
Coixlactam	COC(=O)[C@@H]1CC2=CC=CC=C2NC1=O	JDKYMNFPRFYLKN-MRVPVSSYSA-N	Organoheterocyclic compounds	Quinolines and derivatives	Quinolones and derivatives
Diglutamylleucine	N[C@@H](CCC(=O)O)C(=O)N([C@@H](CC(C)C)C(=O)O)C([C@@H](N)CCC(=O)O)=O	GOTWVZWCTMMOIN-DCAQKATOSA-N	Organic acids and derivatives	Carboxylic acids and derivatives	Amino acids, peptides, and analogues
9?-Hydroxyoxysophocarpine
Spiramine%20T	CC(=O)O[C@@H]1[C@@H]2[C@]3(CCC[C@@]24[C@@H]5C[C@@H]6CC[C@@]5([C@@H]1OC4N7[C@@H]3OCC7)C[C@@]6(C)O)C	ZVGHBOHWOUTHNI-LLVQXVSMSA-N	Lipids and lipid-like molecules	Prenol lipids	Diterpenoids
5-Hydroxy-DL-tryptophan(5-HTP)	C1=CC2=C(C=C1O)C(=CN2)CC(C(=O)O)N	LDCYZAJDBXYCGN-UHFFFAOYSA-N	Organoheterocyclic compounds	Indoles and derivatives	Tryptamines and derivatives
Asn-Hyp
Cyclo%20(L-Prolyl-L-tyrosine
Cyclo(L-tyrosyl-D-proline)
Cyclo(Phe-Glu)
Cyclo(Val-Ala)
CycloPro-Arg
Gln-Val-Val-Cys
5-methyl%201-propyl%20L-glutamate	N[C@@H](CCC(=O)OC)C(=O)OCCC	AOSUWIUFRBMLEY-ZETCQYMHSA-N	Organic acids and derivatives	Carboxylic acids and derivatives	Amino acids, peptides, and analogues
Hyp-Ser
Hyp-Val
L-Aspartic%20acid-O-diglucoside
L-Cysteinyl-L-glycine	C([C@@H](C(=O)NCC(=O)O)N)S	ZUKPVRWZDMRIEO-VKHMYHEASA-N	Organic acids and derivatives	Carboxylic acids and derivatives	Amino acids, peptides, and analogues
L-gamma-Glutamyl-L-leucine	CC(C)C[C@@H](C(=O)O)NC(=O)CC[C@@H](C(=O)O)N	MYFMARDICOWMQP-YUMQZZPRSA-N	Organic acids and derivatives	Carboxylic acids and derivatives	Amino acids, peptides, and analogues
3-(triazan-2-yl)propyl%20L-prolinate	N1[C@@H](CCC1)C(=O)OCCCN(N)N	FSEFSZVKIWVDEN-ZETCQYMHSA-N	Organic acids and derivatives	Carboxylic acids and derivatives	Amino acids, peptides, and analogues
N-(1-Deoxy-1-fructosyl)Arginine	C(C[C@@H](C(=O)O)NCC(=O)[C@H]([C@@H]([C@@H](CO)O)O)O)CN=C(N)N	UEZWWYVAHKTISC-JZKKDOLYSA-N	Organic acids and derivatives	Carboxylic acids and derivatives	Amino acids, peptides, and analogues
N-(1-Deoxy-1-fructosyl)Asparagine
N-(1-Deoxy-1-fructosyl)Glutamic%20acid
N-(1-Deoxy-1-fructosyl)Tryptophan
N-(3,4,5-trihydroxycinnamicacid)-alanine
N-Acetyl-L-glycine
N-alanicacidalkyl-alanine
2,6-diamino-7-methyl-5-oxooctanoic%20acid	NC(C(=O)O)CCC(C(C(C)C)N)=O	BTWIYRVWGFACBE-UHFFFAOYSA-N	Organic acids and derivatives	Carboxylic acids and derivatives	Amino acids, peptides, and analogues
O-phosphate-L-tyrosine	C1=CC(=CC=C1C[C@@H](C(=O)O)N)OP(=O)(O)O	DCWXELXMIBXGTH-QMMMGPOBSA-N	Organic acids and derivatives	Carboxylic acids and derivatives	Amino acids, peptides, and analogues
S-(5'-Adenosy)-L-homocysteine
14-Amino-15-hydroxy-11-methylpentadecanoic%20acid	NC(CCC(CCCCCCCCCC(=O)O)C)CO	LGJUMLPOEFJEEJ-UHFFFAOYSA-N	Lipids and lipid-like molecules	Fatty Acyls	Fatty acids and conjugates
Gamma-Glu-Met	CSCC[C@@H](C(=O)O)NC(=O)CC[C@@H](C(=O)O)N	RQNSKRXMANOPQY-BQBZGAKWSA-N	Organic acids and derivatives	Carboxylic acids and derivatives	Amino acids, peptides, and analogues
Oglufanide	C1=CC=C2C(=C1)C(=CN2)C[C@@H](C(=O)O)NC(=O)[C@H](CCC(=O)O)N	LLEUXCDZPQOJMY-AAEUAGOBSA-N	Organic acids and derivatives	Carboxylic acids and derivatives	Amino acids, peptides, and analogues
2-Aminohexadecane-1,5,6-triol	NC(CO)CCC(C(CCCCCCCCCC)O)O	QWOXXYMHOYMDCY-UHFFFAOYSA-N	Organic oxygen compounds	Organooxygen compounds	Alcohols and polyols
Gamma-Glutamylphenylalanine	C1=CC=C(C=C1)C[C@@H](C(=O)O)NC(=O)CC[C@@H](C(=O)O)N	XHHOHZPNYFQJKL-QWRGUYRKSA-N	Organic acids and derivatives	Carboxylic acids and derivatives	Amino acids, peptides, and analogues
Gamma-Glutamyltyrosine	C1=CC(=CC=C1CC(C(=O)O)NC(=O)CCC(C(=O)O)N)O	VVLXCWVSSLFQDS-QWRGUYRKSA-N	Organic acids and derivatives	Carboxylic acids and derivatives	Amino acids, peptides, and analogues
Maesopsin%204-O-Glucoside(Hovetrichoside%20C)
Sequoiaflavone-5-O-glucoside
3,4,2',4',6'-Pentahydroxychalcone-4'-O-glucoside
Phloretin-2'-O-glucoside%20(Phlorizin)	C1=CC(=CC=C1CCC(=O)C2=C(C=C(C=C2O[C@H]3[C@@H]([C@H]([C@@H]([C@H](O3)CO)O)O)O)O)O)O	IOUVKUPGCMBWBT-QNDFHXLGSA-N	Phenylpropanoids and polyketides	Flavonoids	Flavonoid glycosides
Epicatechin-(4BETA-8, 2BETA-OMICRON-7)-EPICATECHIN-(4BETA-8)-EPICATECHIN)	C1C(C(OC2=C1C(=CC(=C2C3C(C(OC4=C3C(=CC5=C4C6C(C(O5)(OC7=CC(=CC(=C67)O)O)C8=CC(=C(C=C8)O)O)O)O)C9=CC(=C(C=C9)O)O)O)O)O)C1=CC(=C(C=C1)O)O)O	BYSRPHRKESMCPO-LQNPQWRQSA-N	Phenylpropanoids and polyketides	Flavonoids	Biflavonoids and polyflavonoids
Epicatechin-4'-O-?-D-glucopyranoside
1-amino-2,11-dihydroxyicosa-12,14-dien-3-one	NCC(C(CCCCCCCC(C=CC=CCCCCC)O)=O)O	NLWPYTUUXXKPDN-UHFFFAOYSA-N	Organic oxygen compounds	Organooxygen compounds	Carbohydrates and carbohydrate conjugates
6-Geranylnaringenin;%20Mimulone;%20Bonannione%20A	CC(=CCC/C(=C/CC1=C(C2=C(C=C1O)O[C@@H](CC2=O)C3=CC=C(C=C3)O)O)/C)C	XYIQIBWIEGCVQY-RWHUQTJRSA-N	Phenylpropanoids and polyketides	Flavonoids	Flavans
6-Hydroxy-4',5,7-trimethoxyflavanone;%20Hamiltone%20A	COC1=CC=C(C=C1)C2CC(=O)C3=C(C(=C(C=C3O2)OC)O)OC	JEEVVZXYEKPPCC-UHFFFAOYSA-N	Phenylpropanoids and polyketides	Flavonoids	O-methylated flavonoids
(6-amino-3-oxohexan-2-yl)proline	NCCCC(C(C)N1[C@@H](CCC1)C(=O)O)=O	AGVFNVWUHHFBNB-GKAPJAKFSA-N	Organic acids and derivatives	Carboxylic acids and derivatives	Amino acids, peptides, and analogues
Hesperetin-3'-O-glucoside
Isosakuranetin-7-O-glucoside%20(Isosakuranin)
Naringenin-7-O-(6''-malonyl)glucoside
Cis-Coutaric%20acid	O=C(/C=C\c1ccc(O)cc1)OC(C(=O)O)C(O)C(=O)O.O=C(/C=C\c1ccc(O)cc1)O[C@@H](C(=O)O)[C@@H](O)C(=O)O.O=C(/C=C\c1ccc(O)cc1)O[C@H](C(=O)O)[C@@H](O)C(=O)O	RKDZRJHUCCYNSQ-LPDSVZRPSA-N	Phenylpropanoids and polyketides	Cinnamic acids and derivatives	Hydroxycinnamic acids and derivatives
Dihydrokaempferol-7-O-glucoside
Dihydromyricetin-3-O-glucoside
Taxifolin(Dihydroquercetin)	C1=CC(=C(C=C1[C@@H]2[C@H](C(=O)C3=C(C=C(C=C3O2)O)O)O)O)O	CXQWRCVTCMQVQX-LSDHHAIUSA-N	Phenylpropanoids and polyketides	Flavonoids	Flavans
2''-O-(3'',4''-Dimethoxybenzoyl)vitexin	COC1=C(C=C(C=C1)C(=O)OC2C(C(C(OC2C3=C(C=C(C4=C3OC(=CC4=O)C5=CC=C(C=C5)O)O)O)CO)O)O)OC	MRJNVGUJHUWETF-QOXRKEBUSA-N	Phenylpropanoids and polyketides	Flavonoids	Flavonoid glycosides
3',5'-dihydroxy-5,7,4'-trimethoxyflavone-3'-?6''-malonylglucoside?
5,8,3'-trihydroxy-6,7,4'-trimethoxyflavone-8-O-malonylglucoside
5,8,3'-trihydroxy-6,7,4'-trimethoxyflavone-8-O-?-D-glucoside
6,8-Dimethylapigenin-7-O-glucoside
Acacetin-7-O-rutinoside%20(Linarin)	C[C@H]1[C@@H]([C@H]([C@H]([C@@H](O1)OC[C@@H]2[C@H]([C@@H]([C@H]([C@@H](O2)OC3=CC(=C4C(=C3)OC(=CC4=O)C5=CC=C(C=C5)OC)O)O)O)O)O)O)O	YFVGIJBUXMQFOF-PJOVQGMDSA-N	Phenylpropanoids and polyketides	Flavonoids	Flavonoid glycosides
Apigenin-7-O-glucoside(Cosmosiin)	C1=CC(=CC=C1C2=CC(=O)C3=C(C=C(C=C3O2)O[C@H]4[C@@H]([C@H]([C@@H]([C@H](O4)CO)O)O)O)O)O	KMOUJOKENFFTPU-QNDFHXLGSA-N	Phenylpropanoids and polyketides	Flavonoids	Flavonoid glycosides
Chrysin-7-O-glucoside
Chrysoeriol-7-O-Sophoroside-5-O-glucuronide
Chrysosplenetin%20(5,4'-Dihydroxy-3,6,7,3'-tetramethoxyflavone)
Diosmetin-7-O-galactoside
Diosmetin-7-O-glucoside	COC1=C(C=C(C=C1)C2=CC(=O)C3=C(C=C(C=C3O2)O[C@H]4[C@@H]([C@H]([C@@H]([C@H](O4)CO)O)O)O)O)O	WKUHPOMCLBLCOV-MIUGBVLSSA-N	Phenylpropanoids and polyketides	Flavonoids	Flavonoid glycosides
Aromadendrin%20(Dihydrokaempferol)	O1[C@@H]([C@@H](O)C(=O)C=2C(O)=CC(O)=CC12)C1=CC=C(O)C=C1.O1[C@@H]([C@@H](O)C(=O)C=2C(O)=CC(O)=CC12)C1=CC=C(O)C=C1	MLWJTXIKCRHMIL-KLTKGGJTSA-N	Phenylpropanoids and polyketides	Flavonoids	Flavans
1,4-Benzodioxin-6-propanol	O1C=COC2=C1C=CC(=C2)CCCO	LCTQAFFFFACQLI-UHFFFAOYSA-N	Organoheterocyclic compounds	Benzodioxins	Benzo-p-dioxins
Gardenin%20E%205-glucoside
Hispidulin%20(5,7,4'-Trihydroxy-6-methoxyflavone)
Hispidulin-7-O-glucoside(Homoplantaginin)	COC1=C(C=C2C(=C1O)C(=O)C=C(O2)C3=CC=C(C=C3)O)O[C@H]4[C@@H]([C@H]([C@@H]([C@H](O4)CO)O)O)O	GCLAFEGUXXHIFT-IWLDQSELSA-N	Phenylpropanoids and polyketides	Flavonoids	Flavonoid glycosides
Isoorientin-7-O-(6''-feruloyl)arabinoside
Isovitexin-7-O-(6''-sinapoyl)glucoside
Isovitexin-7-O-glucoside(Saponarin)	C1=CC(=CC=C1C2=CC(=O)C3=C(C(=C(C=C3O2)O[C@H]4[C@@H]([C@H]([C@@H]([C@H](O4)CO)O)O)O)[C@H]5[C@@H]([C@H]([C@@H]([C@H](O5)CO)O)O)O)O)O	HGUVPEBGCAVWID-KETMJRJWSA-N	Phenylpropanoids and polyketides	Flavonoids	Flavonoid glycosides
Luteolin-3'-O-glucoside	C1=CC(=C(C=C1C2=CC(=O)C3=C(C=C(C=C3O2)O)O)O[C@H]4[C@@H]([C@H]([C@@H]([C@H](O4)CO)O)O)O)O	VNTMXJLNIJFLIF-QNDFHXLGSA-N	Phenylpropanoids and polyketides	Flavonoids	Flavonoid glycosides
Luteolin-7-O-(6''-eudesmyl)glucoside
Luteolin-7-O-(6''-sinapoyl)glucoside
Luteolin-7-O-glucoside%20(Cynaroside)	C1=CC(=C(C=C1C2=CC(=O)C3=C(C=C(C=C3O2)O[C@H]4[C@@H]([C@H]([C@@H]([C@H](O4)CO)O)O)O)O)O)O	PEFNSGRTCBGNAN-QNDFHXLGSA-N	Phenylpropanoids and polyketides	Flavonoids	Flavonoid glycosides
Mearnsetin-3-O-glucoside
Nepetin-7-O-alloside
Nepetin-7-O-glucoside(Nepitrin)	COC1=C(C=C2C(=C1O)C(=O)C=C(O2)C3=CC(=C(C=C3)O)O)O[C@H]4[C@@H]([C@H]([C@@H]([C@H](O4)CO)O)O)O	DMXHXBGUNHLMQO-IWLDQSELSA-N	Phenylpropanoids and polyketides	Flavonoids	Flavonoid glycosides
Nobiletin%20(5,6,7,8,3',4'-Hexamethoxyflavone)	COC1=C(C=C(C=C1)C2=CC(=O)C3=C(O2)C(=C(C(=C3OC)OC)OC)OC)OC	MRIAQLRQZPPODS-UHFFFAOYSA-N	Phenylpropanoids and polyketides	Flavonoids	O-methylated flavonoids
Pectolinarigenin-7-O-glucoside
2-(2,3-dihydroxypropoxy)-3-(((2-(dimethylamino)ethoxy)(hydroxy)phosphoryl)oxy)propan-2-yl%20(Z)-14-Octadecenoic%20Acid	OC(COC(C)(COP(=O)(O)OCCN(C)C)C(C(=O)O)CCCCCCCCCCC\C=C/CCC)CO	KXEWGCWYMCCUSK-FPLPWBNLSA-N	Organic acids and derivatives	Organic phosphoric acids and derivatives	Phosphate esters
Tricetin%203'-glucuronide
Tricin-4'-O-glucoside
Tricin-7-O-(2''-Sinapoyl)glucoside
Vitexin-7-O-(6''-p-coumaroyl)glucoside
3,5,4'-Trihydroxy-7-methoxyflavone%20(Rhamnocitrin)	COC1=CC(=C2C(=C1)OC(=C(C2=O)O)C3=CC=C(C=C3)O)O	MQSZRBPYXNEFHF-UHFFFAOYSA-N	Phenylpropanoids and polyketides	Flavonoids	Flavones
5,2',5'-Trihydroxy-3,7,4'-trimethoxyflavone-2'-O-?-D-malonylglucoside
5,4'-Dihydroxy-3,7-dimethoxyflavone(Kumatakenin)	COC1=CC(=C2C(=C1)OC(=C(C2=O)OC)C3=CC=C(C=C3)O)O	BJBUTJQYZDYRMJ-UHFFFAOYSA-N	Phenylpropanoids and polyketides	Flavonoids	O-methylated flavonoids
6-Hydroxykaempferol-7-O-glucoside
Amoenin
Avicularin(Quercetin-3-O-alpha-L-arabinofuranoside)	C1[C@@H]([C@@H]([C@H](C(O1)OC2=C(OC3=CC(=CC(=C3C2=O)O)O)C4=CC(=C(C=C4)O)O)O)O)O	PZZRDJXEMZMZFD-BSXBAJJASA-N	Phenylpropanoids and polyketides	Flavonoids	Flavonoid glycosides
Casticin%20(5,3'-Dihydroxy-3,6,7,4'-Tetramethoxyflavone)
Gnetifolin%20B	COC1=C(OC2=CC(=CC(=C2C1=O)O)O)C3=CC(=CC=C3)O	GXOGRBAJUMLKCZ-UHFFFAOYSA-N	Phenylpropanoids and polyketides	Flavonoids	O-methylated flavonoids
Gossypetin-8-O-glucoside	C1=CC(=C(C=C1C2=C(C(=O)C3=C(O2)C(=C(C=C3O)O)O[C@H]4[C@@H]([C@H]([C@@H]([C@H](O4)CO)O)O)O)O)O)O	SJRXVLUZMMDCNG-KKPQBLLMSA-N	Phenylpropanoids and polyketides	Flavonoids	Flavonoid glycosides
Gossypetin-8-O-?-D-glucuronide
Isorhamnetin-3-O-arabinoside
Isorhamnetin-7-O-glucoside%20(Brassicin)	COC1=C(C=CC(=C1)C2=C(C(=O)C3=C(C=C(C=C3O2)O[C@H]4[C@@H]([C@H]([C@@H]([C@H](O4)CO)O)O)O)O)O)O	YCUNOXSUHVGZRI-XMHBHJPISA-N	Phenylpropanoids and polyketides	Flavonoids	Flavonoid glycosides
Kaempferide%20(3,5,7-Trihydroxy-4'-methoxyflavone)	COC1=CC=C(C=C1)C2=C(C(=O)C3=C(C=C(C=C3O2)O)O)O	SQFSKOYWJBQGKQ-UHFFFAOYSA-N	Phenylpropanoids and polyketides	Flavonoids	Flavones
Kaempferol-3,7-O-diglucoside
Kaempferol-3-O-(6''-malonyl)galactoside
Kaempferol-3-O-galactoside%20(Trifolin)	C1=CC(=CC=C1C2=C(C(=O)C3=C(C=C(C=C3O2)O)O)O[C@H]4[C@@H]([C@H]([C@H]([C@H](O4)CO)O)O)O)O	JPUKWEQWGBDDQB-DTGCRPNFSA-N	Phenylpropanoids and polyketides	Flavonoids	Flavonoid glycosides
Kaempferol-3-O-glucoside%20(Astragalin)	C1=CC(=CC=C1C2=C(C(=O)C3=C(C=C(C=C3O2)O)O)O[C@H]4[C@@H]([C@H]([C@@H]([C@H](O4)CO)O)O)O)O	JPUKWEQWGBDDQB-QSOFNFLRSA-N	Phenylpropanoids and polyketides	Flavonoids	Flavonoid glycosides
Kaempferol-3-O-rhamnoside%20(Afzelin)(Kaempferin)	C[C@H]1[C@@H]([C@H]([C@H]([C@@H](O1)OC2=C(OC3=CC(=CC(=C3C2=O)O)O)C4=CC=C(C=C4)O)O)O)O	SOSLMHZOJATCCP-AEIZVZFYSA-N	Phenylpropanoids and polyketides	Flavonoids	Flavonoid glycosides
Kaempferol-3-O-sulfonate
Kaempferol-4'-O-glucoside	C1=CC(=CC=C1C2=C(C(=O)C3=C(C=C(C=C3O2)O)O)O)O[C@H]4[C@@H]([C@H]([C@@H]([C@H](O4)CO)O)O)O	AUCGRWHWAGXNQS-HMGRVEAOSA-N	Phenylpropanoids and polyketides	Flavonoids	Flavonoid glycosides
Limocitrin-3-O-glucoside	COC1=C(C=CC(=C1)C2=C(C(=O)C3=C(O2)C(=C(C=C3O)O)OC)O[C@H]4C(C([C@@H]([C@H](O4)CO)O)O)O)O	XZGXHUKLGCOGII-YXTZPTRNSA-N	Phenylpropanoids and polyketides	Flavonoids	Flavonoid glycosides
Persicarin%20(Isohamnetin-3-O-sulfate)
Quercetagetin;%203,3',4',5,6,7-Hexahydroxyflavone	C1=CC(=C(C=C1C2=C(C(=O)C3=C(O2)C=C(C(=C3O)O)O)O)O)O	ZVOLCUVKHLEPEV-UHFFFAOYSA-N	Phenylpropanoids and polyketides	Flavonoids	Flavones
Quercetin-3-O-(4''-O-glucosyl)rhamnoside
Quercetin-3-O-alloside;%20Isohyperoside
Quercetin-3-O-galactoside%20(Hyperin)	C1=CC(=C(C=C1C2=C(C(=O)C3=C(C=C(C=C3O2)O)O)O[C@H]4[C@@H]([C@H]([C@H]([C@H](O4)CO)O)O)O)O)O	OVSQVDMCBVZWGM-DTGCRPNFSA-N	Phenylpropanoids and polyketides	Flavonoids	Flavonoid glycosides
Quercetin-3-O-glucoside%20(Isoquercitrin)	C1=CC(=C(C=C1C2=C(C(=O)C3=C(C=C(C=C3O2)O)O)O[C@H]4[C@@H]([C@H]([C@@H]([C@H](O4)CO)O)O)O)O)O	OVSQVDMCBVZWGM-QSOFNFLRSA-N	Phenylpropanoids and polyketides	Flavonoids	Flavonoid glycosides
Quercetin-3-O-rutinoside%20(Rutin)	C[C@H]1[C@@H]([C@H]([C@H]([C@@H](O1)OC[C@@H]2[C@H]([C@@H]([C@H]([C@@H](O2)OC3=C(OC4=CC(=CC(=C4C3=O)O)O)C5=CC(=C(C=C5)O)O)O)O)O)O)O)O	IKGXIBQEEMLURG-NVPNHPEKSA-N	Phenylpropanoids and polyketides	Flavonoids	Flavonoid glycosides
Quercetin-3-O-sophoroside%20(Baimaside)	C1=CC(=C(C=C1C2=C(C(=O)C3=C(C=C(C=C3O2)O)O)O[C@H]4[C@@H]([C@H]([C@@H]([C@H](O4)CO)O)O)O[C@H]5[C@@H]([C@H]([C@@H]([C@H](O5)CO)O)O)O)O)O	RDUAJIJVNHKTQC-UJECXLDQSA-N	Phenylpropanoids and polyketides	Flavonoids	Flavonoid glycosides
Quercetin-3-O-xyloside%20(Reynoutrin)	C1C(C(C(C(O1)OC2=C(OC3=CC(=CC(=C3C2=O)O)O)C4=CC(=C(C=C4)O)O)O)O)O	PZZRDJXEMZMZFD-UHFFFAOYSA-N	Phenylpropanoids and polyketides	Flavonoids	Flavonoid glycosides
Quercetin-4'-O-glucoside%20(Spiraeoside)	C1=CC(=C(C=C1C2=C(C(=O)C3=C(C=C(C=C3O2)O)O)O)O)O[C@H]4[C@@H]([C@H]([C@@H]([C@H](O4)CO)O)O)O	OIUBYZLTFSLSBY-HMGRVEAOSA-N	Phenylpropanoids and polyketides	Flavonoids	Flavonoid glycosides
Quercetin-4'-O-glucuronide	C1=CC(=C(C=C1C2=C(C(=O)C3=C(C=C(C=C3O2)O)O)O)O)O[C@H]4[C@@H]([C@H]([C@@H]([C@H](O4)C(=O)O)O)O)O	OUQZCILJSVDJFB-JENRNSKYSA-N	Phenylpropanoids and polyketides	Flavonoids	Flavonoid glycosides
Tupichinol%20E	CC1=C(C=C(C2=C1OC(=C(C2=O)O)C3=CC=C(C=C3)O)O)OC	HCRLNUIDURQGLT-UHFFFAOYSA-N	Phenylpropanoids and polyketides	Flavonoids	Flavones
Prunetin%20(5,4'-Dihydroxy-7-methoxyisoflavone)	COC1=CC(=C2C(=C1)OC=C(C2=O)C3=CC=C(C=C3)O)O	KQMVAGISDHMXJJ-UHFFFAOYSA-N	Phenylpropanoids and polyketides	Isoflavonoids	O-methylated isoflavonoids
Equol;%207,4'-Homoisoflavane	C1C(COC2=C1C=CC(=C2)O)C3=CC=C(C=C3)O	ADFCQWZHKCXPAJ-UHFFFAOYSA-N	Phenylpropanoids and polyketides	Isoflavonoids	Isoflavans
1-(2,3-dihydroxypropoxy)-3-(((2-(dimethylamino)ethoxy)(hydroxy)phosphoryl)oxy)propan-2-yl%20(Z)-14-Octadecenoic%20Acid	OC(COCC(COP(=O)(O)OCCN(C)C)C(C(=O)O)CCCCCCCCCCC\C=C/CCC)CO	QGXQFSKSGXBZJM-SREVYHEPSA-N	Lipids and lipid-like molecules	Glycerolipids	Monoradylglycerols
4-Hydroxycoumarin%20di-glucoside
4-Methoxy-5-methylcoumarin-7-O-sulfate
7-Hydroxycoumarin-O-rhamnoside
7-Hydroxycoumarin;Umbelliferone	C1=CC(=CC2=C1C=CC(=O)O2)O	ORHBXUUXSCNDEV-UHFFFAOYSA-N	Phenylpropanoids and polyketides	Coumarins and derivatives	Hydroxycoumarins
Apiosylskimmin%20(Adicardin)	C1[C@@]([C@H]([C@@H](O1)OC[C@@H]2[C@H]([C@@H]([C@H]([C@@H](O2)OC3=CC4=C(C=C3)C=CC(=O)O4)O)O)O)O)(CO)O	SXPBJYHKMRWZNA-ZITSYKRSSA-N	Phenylpropanoids and polyketides	Coumarins and derivatives	Coumarin glycosides
Edgeworin%20acetate
Esculetin%20(6,7-Dihydroxycoumarin)	C1=CC(=O)OC2=CC(=C(C=C21)O)O	ILEDWLMCKZNDJK-UHFFFAOYSA-N	Phenylpropanoids and polyketides	Coumarins and derivatives	Hydroxycoumarins
Esculin%20(6,7-Dihydroxycoumarin-6-O-glucoside)	C1=CC(=O)OC2=CC(=C(C=C21)O[C@H]3[C@@H]([C@H]([C@@H]([C@H](O3)CO)O)O)O)O	XHCADAYNFIFUHF-TVKJYDDYSA-N	Phenylpropanoids and polyketides	Coumarins and derivatives	Coumarin glycosides
Feruloyl%20fraxin
Fraxetin-7,8-di-O-glucoside
Fraxetin-8-O-glucoside%20(Fraxin)	COC1=C(C(=C2C(=C1)C=CC(=O)O2)O[C@H]3[C@@H]([C@H]([C@@H]([C@H](O3)CO)O)O)O)O	CRSFLLTWRCYNNX-QBNNUVSCSA-N	Phenylpropanoids and polyketides	Coumarins and derivatives	Coumarin glycosides
Hydroxymethyl%20coumarin%20xyloside
Isofraxidin-7-O-glucoside
1-(4-Hydroxybenzoyl)Glucose;%2025545-07-7	OC[C@@H](O)[C@@H](O)[C@H](O)[C@@H](O)C(=O)C(=O)c1ccc(O)cc1	KOUKJYNKOCFWNE-JBYGLJPXSA-N	Organic oxygen compounds	Organooxygen compounds	Carbohydrates and carbohydrate conjugates
Isoscopoletin-Beta-D-glucoside	COC1=C(C=C2C=CC(=O)OC2=C1)O[C@H]3[C@@H]([C@H]([C@@H]([C@H](O3)CO)O)O)O	WBAVLTNIRYDCPM-YMILTQATSA-N	Phenylpropanoids and polyketides	Coumarins and derivatives	Coumarin glycosides
O-Feruloyl%204-hydroxycoumarin
Phellodenol%20E
Scopoletin%20(7-Hydroxy-6-methoxycoumarin)	COC1=C(C=C2C(=C1)C=CC(=O)O2)O	RODXRVNMMDRFIK-UHFFFAOYSA-N	Phenylpropanoids and polyketides	Coumarins and derivatives	Hydroxycoumarins
Scopoletin-7-O-glucoside%20(Scopolin)	COC1=C(C=C2C(=C1)C=CC(=O)O2)O[C@H]3[C@@H]([C@H]([C@@H]([C@H](O3)CO)O)O)O	SGTCGCCQZOUMJJ-YMILTQATSA-N	Phenylpropanoids and polyketides	Coumarins and derivatives	Coumarin glycosides
Sideretin%20(5,7,8-Trihydroxy-6-methoxycoumarin)	COC1=C(C(=C2C(=C1O)C=CC(=O)O2)O)O	WMAQKVUYHVUULI-UHFFFAOYSA-N	Phenylpropanoids and polyketides	Coumarins and derivatives	Hydroxycoumarins
Skimmin%20(7-Hydroxycoumarin-7-O-glucoside)	C1=CC(=CC2=C1C=CC(=O)O2)O[C@H]3[C@@H]([C@H]([C@@H]([C@H](O3)CO)O)O)O	VPAOSFFTKWUGAD-TVKJYDDYSA-N	Phenylpropanoids and polyketides	Coumarins and derivatives	Coumarin glycosides
5'-Methoxyisolariciresinol-9'-O-glucoside
7R-Dihydrodehydrodiconiferyl%20alcohol%204-O-?-D-glucopyranoside
Cycloolivil-6-O-glucoside
Dehydrodiconiferylalcohol-9'-O-glucoside
Dihydrodehydrodiconiferyl%20alcohol-4-O-glucoside
Guaiacylglycerol-Beta-Guaiacyl%20Ether	COC1=CC=CC=C1OC(CO)C(C2=CC(=C(C=C2)O)OC)O	PPZSOILKWHVNNS-UHFFFAOYSA-N	Lignans, neolignans and related compounds	Unassigned	Unassigned
Isolariciresinol-9'-O-rhamnoside%20(Aviculin)	C[C@H]1[C@@H]([C@H]([C@H]([C@@H](O1)OC[C@H]2[C@@H](CC3=CC(=C(C=C3[C@@H]2C4=CC(=C(C=C4)O)OC)O)OC)CO)O)O)O	FPJFPMQEUVMUKU-CDDCGRQRSA-N	Lignans, neolignans and related compounds	Lignan glycosides	Unassigned
Isolariciresinol-9-O-xyloside
2-(3,4-dihydroxyphenylmethyl)-6-feruloyl-O-glucosyl-D-xylose	OC=1C=C(C=CC1O)C[C@@](C=O)(OC1[C@H](O)[C@@H](O)[C@H](O)[C@H](O1)C(O)C(\C=C\C1=CC(OC)=C(O)C=C1)=O)[C@@H](O)[C@H](O)CO	PZHKACJQRNTAHP-BJXQFZLHSA-N	Phenylpropanoids and polyketides	Cinnamic acids and derivatives	Cinnamic acid esters
Olivil-4,4'-Di-O-glucoside
Pinoresinol-4,4'-O-diglucoside
Secoisolariciresinol%204-O-glucoside
Secoisolariciresinol-9'-O-xyloside	COC1=C(C=CC(=C1)CC(CO)C(CC2=CC(=C(C=C2)O)OC)COC3C(C(C(CO3)O)O)O)O	KAXGCKCCFQIHTO-UHFFFAOYSA-N	Lignans, neolignans and related compounds	Lignan glycosides	Unassigned
Syringaresinol-4'-O-glucoside;%20Acanthoside%20B	COC1=CC(=CC(=C1O)OC)[C@@H]2[C@H]3CO[C@@H]([C@H]3CO2)C4=CC(=C(C(=C4)OC)O[C@H]5[C@@H]([C@H]([C@@H]([C@H](O5)CO)O)O)O)OC	WEKCEGQSIIQPAQ-IRBNZIFYSA-N	Lignans, neolignans and related compounds	Lignan glycosides	Unassigned
guaiacylglycerol-beta-coniferyl%20ether	COC1=C(C=CC(=C1)/C=C/CO)OC(CO)C(C2=CC(=C(C=C2)O)OC)O	FYEZJIXULOZDRT-ONEGZZNKSA-N	Lignans, neolignans and related compounds	Unassigned	Unassigned
syringaresinol-4-O-?-D-glucopyranoside
tetrahydrodehydrodiconiferyl%20alcohol%20glucoside
11-HEDE	CCCCCC=CC=CC(CCCCCCCCCC(=O)O)O	HDMIRVFIVOGVIC-UHFFFAOYSA-N	Lipids and lipid-like molecules	Fatty Acyls	Eicosanoids
11-Octadecanoic%20acid(Vaccenic%20acid)	CCCCCC/C=C/CCCCCCCCCC(=O)O	UWHZIFQPPBDJPM-BQYQJAHWSA-N	Lipids and lipid-like molecules	Fatty Acyls	Fatty acids and conjugates
12,13-DHOME;%20(9Z)-12,13-Dihydroxyoctadec-9-enoic%20acid	CCCCCC(C(C/C=C\CCCCCCCC(=O)O)O)O	CQSLTKIXAJTQGA-FLIBITNWSA-N	Lipids and lipid-like molecules	Fatty Acyls	Fatty acids and conjugates
13(S)-HODE;13(S)-Hydroxyoctadeca-9Z,11E-dienoic%20acid	CCCCC[C@@H](/C=C/C=C\CCCCCCCC(=O)O)O	HNICUWMFWZBIFP-IRQZEAMPSA-N	Lipids and lipid-like molecules	Fatty Acyls	Lineolic acids and derivatives
N-(3-hydroxy-4-methoxyphenethyl)-4-hydroxybutanamide	OC=1C=C(CCNC(CCCO)=O)C=CC1OC	RUFDUTQIIDOVKP-UHFFFAOYSA-N	Benzenoids	Phenols	Methoxyphenols
Chrysoeriol;%205,7,4'-Trihydroxy-3'-Methoxyflavone	OC1=C2C(C=C(OC2=CC(=C1)O)C1=CC(=C(C=C1)O)OC)=O.O1C(=CC(=O)C=2C(O)=CC(O)=CC12)C1=CC(OC)=C(O)C=C1	JGFSIKMBBDCKEJ-UHFFFAOYSA-N	Phenylpropanoids and polyketides	Flavonoids	O-methylated flavonoids
5S,8R-DiHODE;%20(5S,8R,9Z,12Z)-5,8-Dihydroxyoctadeca-9,12-dienoate
Diosmetin%20(5,7,3'-Trihydroxy-4'-methoxyflavone)	OC1=C2C(C=C(OC2=CC(=C1)O)C1=CC(=C(C=C1)OC)O)=O.O1C(=CC(=O)C=2C(O)=CC(O)=CC12)C1=CC(O)=C(OC)C=C1	KDAKIMQFBYLKGE-UHFFFAOYSA-N	Phenylpropanoids and polyketides	Flavonoids	O-methylated flavonoids
7S,8S-DiHODE;%20(9Z,12Z)-(7S,8S)-Dihydroxyoctadeca-9,12-dienoic%20acid
Naringenin%20(5,7,4'-Trihydroxyflavanone)	OC1=C2C(CC(OC2=CC(=C1)O)C1=CC=C(C=C1)O)=O.O1[C@@H](CC(=O)C=2C(O)=CC(O)=CC12)C1=CC=C(O)C=C1	WDZMTGXSLCFDIK-ZOWNYOTGSA-N	Phenylpropanoids and polyketides	Flavonoids	Flavans
9,12,13-TriHOME;%209(S),12(S),13(S)-Trihydroxy-10(E)-octadecenoic%20acid	CCCCC[C@H](O)[C@@H](O)\C=C\[C@@H](O)CCCCCCCC(O)=O	MDIUMSLCYIJBQC-MVFSOIOZSA-N	Lipids and lipid-like molecules	Fatty Acyls	Fatty acids and conjugates
9-Hydroperoxy-9Z,11E-Octadecadienoic%20Acid
Cetostearic%20acid
Dihydroxyoctanoic%20acid%20glucoside
Dodecanedioic%20aicd
Hydroxypentadecenoic%20acid%20glucoside
N-(2-Hydroxyethyl)eicosapentaenoic%20acid
Punicic%20acid%20(9Z,11E,13Z-octadecatrienoic%20acid)	CCCC/C=C\C=C\C=C/CCCCCCCC(=O)O	CUXYLFPMQMFGPL-BGDVVUGTSA-N	Lipids and lipid-like molecules	Fatty Acyls	Lineolic acids and derivatives
alpha-Linolenic%20Acid	CC/C=C\C/C=C\C/C=C\CCCCCCCC(=O)O	DTOSIQBPPRVQHS-PDBXOOCHSA-N	Lipids and lipid-like molecules	Fatty Acyls	Lineolic acids and derivatives
1-Linoleoyl-2-Lysophosphatidic%20Acid%20Monomethyl%20Ester
1-Linoleoylglycerol-2,3-di-O-glucoside
1-Palmitoyl-Sn-Glycerol%203-O-Diglucoside
1-alpha-Linolenoyl-glycerol	CC/C=C\C/C=C\C/C=C\CCCCCCCC(=O)OC[C@H](CO)O	GGJRAQULURVTAJ-IWFQAGGASA-N	Lipids and lipid-like molecules	Fatty Acyls	Lineolic acids and derivatives
2-Linoleoylglycerol-1,3-di-O-glucoside
2-Palmitoyl-Sn-Glycerol%203-O-Diglucoside
2-alpha-Linolenoyl-glycerol	CC/C=C\C/C=C\C/C=C\CCCCCCCC(=O)OC(CO)CO	ZCCLDKGWJIREQF-PDBXOOCHSA-N	Lipids and lipid-like molecules	Fatty Acyls	Lineolic acids and derivatives
DGMG%2018:1
DGMG%2018:1(2n%20isomer)
DGMG%2018:2(2n%20isomer)
Glycerol%209,11,13-octadecatrienoyl%20ester
LysoPA%2016:0	CCCCCCCCCCCCCCCC(=O)OC[C@H](COP(=O)(O)O)O	YNDYKPRNFWPPFU-GOSISDBHSA-N	Lipids and lipid-like molecules	Glycerophospholipids	Glycerophosphates
LysoPG%2016:0	CCCCCCCCCCCCCCCC(=O)OC[C@H](COP(=O)(O)OC[C@H](CO)O)O	BVJSKAUUFXBDOB-LEWJYISDSA-N	Lipids and lipid-like molecules	Glycerophospholipids	Glycerophosphoglycerols
MG(18:3(9Z,12Z,15Z)/0:0/0:0)	CC/C=C\C/C=C\C/C=C\CCCCCCCC(=O)OC[C@H](CO)O	GGJRAQULURVTAJ-IWFQAGGASA-N	Lipids and lipid-like molecules	Fatty Acyls	Lineolic acids and derivatives
PA(18:1/0:0)	CCCCCCCC/C=C\CCCCCCCC(=O)OC[C@H](COP(=O)(O)O)O	WRGQSWVCFNIUNZ-GDCKJWNLSA-N	Lipids and lipid-like molecules	Glycerophospholipids	Glycerophosphates
PA(18:2/0:0)
PI(18:1/0:0)	CCCCCCCC/C=C\CCCCCCCC(=O)OC[C@H](COP(=O)(O)OC1C([C@@H](C(C(C1O)O)O)O)O)O	UGDOFRYHDCDVHD-YLMUREAQSA-N	Lipids and lipid-like molecules	Glycerophospholipids	Glycerophosphoinositols
LysoPC%2012:0	CCCCCCCCCCCC(=O)OC[C@H](COP(=O)([O-])OCC[N+](C)(C)C)O	BWKILASWCLJPBO-LJQANCHMSA-N	Lipids and lipid-like molecules	Glycerophospholipids	Glycerophosphocholines
LysoPC%2015:0(2n%20isomer)
LysoPC%2015:0	CCCCCCCCCCCCCCC(=O)OC[C@H](COP(=O)([O-])OCC[N+](C)(C)C)O	RJZVWDTYEWCUAR-JOCHJYFZSA-N	Lipids and lipid-like molecules	Glycerophospholipids	Glycerophosphocholines
LysoPC%2016:0	CCCCCCCCCCCCCCCC(=O)OC[C@H](COP(=O)([O-])OCC[N+](C)(C)C)O	ASWBNKHCZGQVJV-HSZRJFAPSA-N	Lipids and lipid-like molecules	Glycerophospholipids	Glycerophosphocholines
LysoPC%2016:0(2n%20isomer)
LysoPC%2016:1(2n%20isomer)
LysoPC%2016:1	CCCCCC/C=C\CCCCCCCC(=O)OC[C@H](COP(=O)([O-])OCC[N+](C)(C)C)O	LFUDDCMNKWEORN-ZXEGGCGDSA-N	Lipids and lipid-like molecules	Glycerophospholipids	Glycerophosphocholines
LysoPC%2016:2(2n%20isomer)
LysoPC%2017:0(2n%20isomer)
LysoPC%2017:0	CCCCCCCCCCCCCCCCC(=O)OC[C@H](COP(=O)([O-])OCC[N+](C)(C)C)O	SRRQPVVYXBTRQK-XMMPIXPASA-N	Lipids and lipid-like molecules	Glycerophospholipids	Glycerophosphocholines
LysoPC%2017:2(2n%20isomer)
LysoPC%2018:0	CCCCCCCCCCCCCCCCCC(=O)OC[C@H](COP(=O)([O-])OCC[N+](C)(C)C)O	IHNKQIMGVNPMTC-RUZDIDTESA-N	Lipids and lipid-like molecules	Glycerophospholipids	Glycerophosphocholines
LysoPC%2018:0(2n%20isomer)
LysoPC%2018:1	CCCCCCCC/C=C\CCCCCCCC(=O)OC[C@H](COP(=O)([O-])OCC[N+](C)(C)C)O	YAMUFBLWGFFICM-PTGWMXDISA-N	Lipids and lipid-like molecules	Glycerophospholipids	Glycerophosphocholines
LysoPC%2018:1(2n%20isomer)
LysoPC%2018:2	CCCCC/C=C\C/C=C\CCCCCCCC(=O)OC[C@H](COP(=O)([O-])OCC[N+](C)(C)C)O	SPJFYYJXNPEZDW-FTJOPAKQSA-N	Lipids and lipid-like molecules	Glycerophospholipids	Glycerophosphocholines
LysoPC%2018:2(2n%20isomer)
LysoPC%2018:3	CC/C=C\C/C=C\C/C=C\CCCCCCCC(=O)OC[C@H](COP(=O)([O-])OCC[N+](C)(C)C)O	WKQNRCYKYCKESD-YVHLTTHBSA-N	Lipids and lipid-like molecules	Glycerophospholipids	Glycerophosphocholines
LysoPC%2018:3(2n%20isomer)
LysoPC%2018:4	CC/C=C\C/C=C\C/C=C\C/C=C\CCCCC(=O)OC[C@H](COP(=O)([O-])OCC[N+](C)(C)C)O	RVSJNDKZLRQIIG-VDNIJTNNSA-N	Lipids and lipid-like molecules	Glycerophospholipids	Glycerophosphocholines
LysoPC%2019:1
LysoPC%2019:2
LysoPC%2019:2(2n%20isomer)
LysoPC%2020:0	CCCCCCCCCCCCCCCCCCCC(=O)OC[C@H](COP(=O)([O-])OCC[N+](C)(C)C)O	UATOAILWGVYRQS-HHHXNRCGSA-N	Lipids and lipid-like molecules	Glycerophospholipids	Glycerophosphocholines
LysoPC%2020:1	CCCCCCCC/C=C\CCCCCCCCCC(=O)OC[C@H](COP(=O)([O-])OCC[N+](C)(C)C)O	YYSFWGQAKJTHRE-MEOKJUQFSA-N	Lipids and lipid-like molecules	Glycerophospholipids	Glycerophosphocholines
LysoPC%2020:2	CCCCC/C=C\C/C=C\CCCCCCCCCC(=O)OC[C@H](COP(=O)([O-])OCC[N+](C)(C)C)O	YYQVCMMXPIJVHY-ZOIJLGJPSA-N	Lipids and lipid-like molecules	Glycerophospholipids	Glycerophosphocholines
LysoPC%2020:2(2n%20isomer)
LysoPC%2020:4	CCCCC/C=C\C/C=C\C/C=C\C/C=C\CCCC(=O)OC[C@H](COP(=O)([O-])OCC[N+](C)(C)C)O	LAXQYRRMGGEGOH-JXRLJXCWSA-N	Lipids and lipid-like molecules	Glycerophospholipids	Glycerophosphocholines
LysoPC%2022:5	CC/C=C\C/C=C\C/C=C\C/C=C\C/C=C\CCCCCC(=O)OC[C@H](COP(=O)([O-])OCC[N+](C)(C)C)O	BIEOSECQPGGZMF-NAIWXXGBSA-N	Lipids and lipid-like molecules	Glycerophospholipids	Glycerophosphocholines
LysoPC%2022:5(2n%20isomer)
HexosylLPE16:0	CCCCCCCCCCCCCCCC(=O)OC[C@H](COP(=O)(O)OCCNC1C(C(C(C(O1)CO)O)O)O)O	UISOORRILGPHLE-OEYVFKEPSA-N	Organic oxygen compounds	Organooxygen compounds	Carbohydrates and carbohydrate conjugates
HexosylLPE18:2
LysoPE%2014:0(2n%20isomer)
LysoPE%2014:0	CCCCCCCCCCCCCC(=O)OC[C@H](COP(=O)(O)OCCN)O	RPXHXZNGZBHSMJ-GOSISDBHSA-N	Lipids and lipid-like molecules	Glycerophospholipids	Glycerophosphoethanolamines
LysoPE%2016:0	CCCCCCCCCCCCCCCC(=O)OC[C@H](COP(=O)([O-])OCC[NH3+])O	YVYMBNSKXOXSKW-HXUWFJFHSA-N	Lipids and lipid-like molecules	Glycerophospholipids	Glycerophosphoethanolamines
LysoPE%2016:0(2n%20isomer)
LysoPE%2016:1(2n%20isomer)
LysoPE%2016:1	CCCCCC/C=C\CCCCCCCC(=O)OC[C@H](COP(=O)(O)OCCN)O	DSOWUEHXZJUNID-WHXUGTBJSA-N	Lipids and lipid-like molecules	Glycerophospholipids	Glycerophosphoethanolamines
LysoPE%2017:1(2n%20isomer)
LysoPE%2018:0	CCCCCCCCCCCCCCCCCC(=O)OC[C@H](COP(=O)(O)OCCN)O	BBYWOYAFBUOUFP-JOCHJYFZSA-N	Lipids and lipid-like molecules	Glycerophospholipids	Glycerophosphoethanolamines
LysoPE%2018:0(2n%20isomer)
LysoPE%2018:1(2n%20isomer)
LysoPE%2018:1	CCCCCCCC/C=C\CCCCCCCC(=O)OC[C@H](COP(=O)(O)OCCN)O	PYVRVRFVLRNJLY-MZMPXXGTSA-N	Lipids and lipid-like molecules	Glycerophospholipids	Glycerophosphoethanolamines
LysoPE%2018:2	CCCCC/C=C\C/C=C\CCCCCCCC(=O)OC[C@H](COP(=O)(O)OCCN)O	DBHKHNGBVGWQJE-USWSLJGRSA-N	Lipids and lipid-like molecules	Glycerophospholipids	Glycerophosphoethanolamines
LysoPE%2018:2(2n%20isomer)
LysoPE%2018:3	CCCCC/C=C\C/C=C\C/C=C\CCCCC(=O)OC[C@H](COP(=O)(O)OCCN)O	QULMFYLWLOKODU-CSLWLMPESA-N	Lipids and lipid-like molecules	Glycerophospholipids	Glycerophosphoethanolamines
LysoPE%2018:3(2n%20isomer)
LysoPE%2020:2	CCCCC/C=C\C/C=C\CCCCCCCCCC(=O)O[C@H](CO)COP(=O)(O)OCCN	NHBRVTKHMMOYTG-XBJNFHHOSA-N	Lipids and lipid-like molecules	Glycerophospholipids	Glycerophosphoethanolamines
LysoPE%2020:2(2n%20isomer)
2-Deoxyribose-1-phosphate	C1[C@@H]([C@H](OC1OP(=O)(O)O)CO)O	KBDKAJNTYKVSEK-PYHARJCCSA-N	Organic oxygen compounds	Organooxygen compounds	Carbohydrates and carbohydrate conjugates
Cordycepin%20(3'-Deoxyadenosine)	C1[C@H](O[C@H]([C@@H]1O)N2C=NC3=C(N=CN=C32)N)CO	OFEZSBMBBKLLBJ-BAJZRUMYSA-N	Nucleosides, nucleotides, and analogues	Purine nucleosides	Purine 3'-deoxyribonucleosides
Crotonoside;%202-Hydroxyadenosine	NC1=C2N=CN([C@@H]3O[C@H](CO)[C@@H](O)[C@H]3O)C2=NC(=O)N1	MIKUYHXYGGJMLM-UUOKFMHZSA-N	Nucleosides, nucleotides, and analogues	Purine nucleosides	Unassigned
Cytidine%205'-monophosphate(Cytidylic%20acid)	C1=CN(C(=O)N=C1N)[C@H]2[C@@H]([C@@H]([C@H](O2)COP(=O)(O)O)O)O	IERHLVCPSMICTF-XVFCMESISA-N	Nucleosides, nucleotides, and analogues	Pyrimidine nucleotides	Pyrimidine ribonucleotides
Flavin%20Single%20Nucleotide(FMN)	CC1=CC2=C(C=C1C)N(C3=NC(=O)NC(=O)C3=N2)C[C@@H]([C@@H]([C@@H](COP(=O)(O)O)O)O)O	FVTCRASFADXXNN-SCRDCRAPSA-N	Nucleosides, nucleotides, and analogues	Flavin nucleotides	Unassigned
3-acetyl-ShikimicAcid
3-methyl-ShikimicAcid
5'-Glucosyloxyjasmanic%20acid
Citric%20acid%20glucoside
Citric%20acid-1-O-diglucoside
Dimethylglyceric%20Acid%20Glucoside
Geranyl%202-Oxoglutaconic%20acid
Isocitric%20acid-1-O-diglucoside
Malic%20acid-1-O-beta-D-glucopyranoside	C(C1C(C(C(C(O1)O[C@@H](CC(=O)O)C(=O)O)O)O)O)O	OCIAPZWBJQRATB-AMRFRDDCSA-N	Lipids and lipid-like molecules	Fatty Acyls	Fatty acyl glycosides
Malic%20acid-1-O-diglucoside
Beta-Hydroxyisovaleric%20acid	CC(C)(CC(=O)O)O	AXFYFNCPONWUHW-UHFFFAOYSA-N	Lipids and lipid-like molecules	Fatty Acyls	Fatty acids and conjugates
Delta-Guanidinovaleric%20acid	C(CCN=C(N)N)CC(=O)O	UKUBCVAQGIZRHL-UHFFFAOYSA-N	Lipids and lipid-like molecules	Fatty Acyls	Fatty acids and conjugates
1,2-Propanediol%201-O-B-D-Glucopyranoside	CC(COC1C(C(C(C(O1)CO)O)O)O)O	AJLVEHFNMNRXNI-UHFFFAOYSA-N	Organic oxygen compounds	Organooxygen compounds	Carbohydrates and carbohydrate conjugates
2-(3-?-D-glucopyranosyloxy-4-hydroxyphenyl)ethanol-1-O-?-D-glucopyranoside
3-(1-hydroxyethyl)-4-methylpentane-1,4-diol%20O-Glucoside
3-Hydroxy-4-isopropylbenzylalcohol-3-O-glucoside
Caffeyl%20alcohol%204-O-?-D-glucopyranoside
D-Threo-guaiacylglycerol-7-O-?-D-glucoside
Demethyl%20coniferin
Homovanillyl%20Alcohol%20Octopyranoside
Vanillyl%20glycol%203-O-(4''-O-arabinosyl)rhamnoside
?-Hydroxy-(3,4-dihydroxyphenylethanolyl)-glucoside
Mycarose%20glucoside
Santalal	C/C(=C/CCC1(C2CC3C1(C3C2)C)C)/C=O	SHEUEEZGXLCROM-YHYXMXQVSA-N	Lipids and lipid-like molecules	Prenol lipids	Sesquiterpenoids
Syringaldehyde-4-O-glucoside
2,5-Dimethyl-7-hydroxychromone%20glucoside
3,5,7,4'-Tetrahydroxy-Coumaronochromone
Noreugenin;%205,7-Dihydroxy-2-Methylchromone	CC1=CC(=O)C2=C(C=C(C=C2O1)O)O	NCUJRUDLFCGVOE-UHFFFAOYSA-N	Organoheterocyclic compounds	Benzopyrans	1-benzopyrans
tetrahydrochromone%20M
Lycoposerramine%20E
4-Methylene-2-octyl-5-oxotetrahydrofuran-3-carboxylicacid(C75)
E-6,7-Dihydroxydihydroligustilide
Machilusolide%20D
Senkyunolide%20M
10?-hydroxy-10-oxo-?8-tetrahydrocannabinol
2,6-dimethoxy-4-hydroxyphenyl-1-O-beta-D-glucopyranoside
3'-Palmitoyl%20sucrose
3'-linoleoyl%20sucrose
3-O-caffeioyl%20sinapyl%20quinic%20acid
3-O-caffeioyl%20sinapyl%20quininyl%20glucoside
3-Oleoyl%20sucrose
4-O-(2''-O-acetyl-6''-P-coumaroyl-?-D-glucopyranosyl)-P-coumaric%20acid
4-O-Glucosyl-3,4-dihydroxybenzyl%20alcohol
5-(2-Hydroxyethyl)-2-O-glucosylphenol
6,9-dihydroxymegastigmasta-5,7-dien-3-one9-O-beta-D-gentiobioside
Benzyl-(2''-O-xylosyl)glucoside
Cis-N-(4-hydroxycinnamyl)tyrosine	OC1=CC=C(\C=C/CN[C@@H](CC2=CC=C(C=C2)O)C(=O)O)C=C1	NQQDBPVNHISSJS-YYZONTRBSA-N	Organic acids and derivatives	Carboxylic acids and derivatives	Amino acids, peptides, and analogues
Coumaroyl%20Quinic%20Acid	C1[C@H]([C@@H]([C@@H](C[C@]1(C(=O)O)O)OC(=O)/C=C/C2=CC=C(C=C2)O)O)O	BMRSEYFENKXDIS-QHAYPTCMSA-N	Organic oxygen compounds	Organooxygen compounds	Alcohols and polyols
Ethyl%201,4-di-O-caffeoylquinate
Feruloyl%20caffeoyl%20quininyl%20glucoside
Phloroglucinol-1-O--D-glucopyranoside	C1=C(C=C(C=C1O)O[C@H]2[C@@H]([C@H]([C@@H]([C@H](O2)CO)O)O)O)O	WXTPOHDTGNYFSB-RMPHRYRLSA-N	Organic oxygen compounds	Organooxygen compounds	Carbohydrates and carbohydrate conjugates
Pyridine-4-formyl-O-?-D-glucopyranoside
Rubusin%20B
glycoric%20acid
p-Hydroxypheny-?-D-allopyranoside
Butyl%20beta-D-glucoside
D-Glucoronic%20acid	[C@@H]1([C@@H]([C@H](OC([C@@H]1O)O)C(=O)O)O)O	AEMOLEFTQBMNLQ-AQKNRBDQSA-N	Organic oxygen compounds	Organooxygen compounds	Carbohydrates and carbohydrate conjugates
Decanoyl%20arabinosylglucoside
Glucaric%20acid-1-Phosphate
Glycerophosphoricacid
Isopentylgentiobioside
Octanoyl%20arabinosylglucoside
4-Pyridoxic%20acid-O-glucoside
Ginkgotoxin%20(4-Methoxypyridoxine)	CC1=NC=C(C(=C1O)COC)CO	SVINQHQHARVZFF-UHFFFAOYSA-N	Organoheterocyclic compounds	Pyridines and derivatives	Pyridoxines
Isoascorbic%20acid%202-O-glucoside
L-Ascorbic%20acid%20(Vitamin%20C)	C([C@@H]([C@@H]1C(=C(C(=O)O1)O)O)O)O	CIWBSHSKHKDKBQ-JLAZNSOCSA-N	Organoheterocyclic compounds	Dihydrofurans	Furanones
Nicotinate%20D-ribonucleoside
Orotic%20acid%20(Vitamin%20B13)	C1=C(NC(=O)NC1=O)C(=O)O	PXQPEWDEAKTCGB-UHFFFAOYSA-N	Organoheterocyclic compounds	Diazines	Pyrimidines and pyrimidine derivatives
Pyridoxine-5'-O-glucoside
Thiamine%20(Vitamin%20B1)	CC1=C(SC=[N+]1CC2=CN=C(N=C2N)C)CCO	JZRWCGZRTZMZEH-UHFFFAOYSA-N	Organoheterocyclic compounds	Diazines	Pyrimidines and pyrimidine derivatives
gamma-Tocotrienol	CC1=C(C=C2CC[C@@](OC2=C1C)(C)CC/C=C(\C)/CC/C=C(\C)/CCC=C(C)C)O	OTXNTMVVOOBZCV-WAZJVIJMSA-N	Lipids and lipid-like molecules	Prenol lipids	Quinone and hydroquinone lipids
1'-Galactoyl%20Ferulic%20acid
1'-O-(3,4-Dihydroxyphenethyl)-O-caffeoyl-glucoside
1'-O-Galactoyl%20p-Coumaric%20acid
1,2,3,6-Tetra-O-galloyl-?-D-glucose
1,3,4-Tri-O-Caffeoyl%20Quinic%20Acid
1,3-O-Dicaffeoylquinic%20Acid%20(Cynarin)	C1[C@H]([C@@H]([C@@H](C[C@]1(C(=O)O)OC(=O)/C=C/C2=CC(=C(C=C2)O)O)OC(=O)/C=C/C3=CC(=C(C=C3)O)O)O)O	YDDUMTOHNYZQPO-RVXRWRFUSA-N	Organic oxygen compounds	Organooxygen compounds	Alcohols and polyols
1,4-O-di-Caffeoyl-3-O-glucoside%20Quinic%20Acid
1,5-O-dicaffeoyl-3-O-glucoside-quinic%20acid
1-O-p-Hydroxycinnamoyl-3-O-caffeoylglycerol	OC1=CC=C(C=CC(=O)OCC(O)COC(\C=C\C2=CC(O)=C(O)C=C2)=O)C=C1	DISOMVQPNGKRHO-PBOGUKDESA-N	Phenylpropanoids and polyketides	Cinnamic acids and derivatives	Hydroxycinnamic acids and derivatives
1-O-(6'-O-feruloyl)glucoside-3-O-Caffeoyl%20Quinic%20Acid
1-O-Caffeoyl-(6-O-glucosyl)-?-D-glucose
1-O-Caffeoyl-?-D-xylose
1-O-Cinnamoyl-?-D-glucose
1-O-Eudesmoylquinic%20acid
1-O-Feruloyl-?-D-glucose	COC1=C(C=CC(=C1)C=CC(=O)O[C@H]2[C@@H]([C@H]([C@@H]([C@H](O2)CO)O)O)O)O	JWRQVQWBNRGGPK-JZYAIQKZSA-N	Phenylpropanoids and polyketides	Cinnamic acids and derivatives	Hydroxycinnamic acids and derivatives
1-O-Galloyl-2-O-Feruloyl-?-D-glucose
1-O-Gentisoyl-?-D-glucoside
1-O-Salicyloyl-?-D-glucose
1-O-Sinapoyl-?-D-glucose
1-O-Vanilloyl-D-Glucose	COC1=C(C=CC(=C1)C(=O)O[C@@H](C=O)[C@H]([C@@H]([C@@H](CO)O)O)O)O	LZCLSDRIZXDSKY-GWNIPJSYSA-N	Organic oxygen compounds	Organooxygen compounds	Carbohydrates and carbohydrate conjugates
1-O-p-Coumaroyl-?-D-glucose
1-O-p-Coumaroylquinic%20acid	C1C(C(C(CC1(C(=O)O)O)OC(=O)C=CC2=CC=C(C=C2)O)O)O	BMRSEYFENKXDIS-LUTKEZBSSA-N	Organic oxygen compounds	Organooxygen compounds	Alcohols and polyols
1-O-rhamnose-3,4-Di-O-Caffeoyl%20Quinic%20Acid
2,3,4-Trihydroxybutyl%206-O-(E)-caffeoyl-?-D-glucopyranoside
2,5-Dihydroxybenzoic%20acid-5-O-glucoside
2-(Phenethoxy)-6-feruloyl-O-glucosyl-D-Xylono-1,5-Lactone
2-O-caffeoyl-5-O-(3-hydroxy-4-phenoxy)-6-acetylglucose
2-Phenylethy-1-O-?-D-glucoside
2-?-D-Glucopyranosyloxy-5-hydroxyphenylacetic%20acidmethylester
3'-Methoxycrenatoside
3'-p-Coumaroyl-sucrose
3,4'-Dihydroxy-3'-methoxybenzenepentanoic%20acid
3,4-Di-O-p-Coumaroylquinic%20acid
3,4-O-Di-p-Coumaroylshikimic%20acid
3,5-Di-O-p-Coumaroylquinic%20acid
3-(Hydroxycinnamoyl)-quinic%20acid
3-Cinnamoyl-5-Caffeoylquinic%20acid
3-O-(3-Methoxy-4-hydroxybenzoyl)-4-O-caffeoylquinic%20acid
3-O-Caffeoyl-4-O-p-Coumaroylquinic%20acid
3-O-Caffeoyl-5-O-p-Coumaroylquinic%20acid
3-O-Cinnamoyl-5-O-caffeoylshikimic%20acid
3-O-Feruloylquinic%20acid-O-glucoside
3-O-feruloyl-shikimicAcid
3-O-p-Coumaroylshikimic%20acid
3-Prenyl-4-O-glucosyloxy-4-hydroxybenzoic%20acid
4-Cinnamoyl-5-Caffeoylquinic%20acid
4-Feruloyl-5-O-Caffeoylquinic%20Acid
4-O-(3'-O-alpha-D-Glucopyranosyl)caffeoylquinic%20acid
4-O-(4'-O-alpha-D-Glucopyranosyl)caffeoylquinic%20acid
4-O-(6'-O-Glucosylferuloyl)-3,4-dihydroxybenzyl%20alcohol
4-O-Cinnamoyl-5-O-caffeoylshikimic%20acid
4-O-Feruloylquinic%20acid%20Glucoside
4-O-Galactoyl%20p-Coumaric%20acid
4-O-Glucosyl-4-hydroxybenzoic%20acid	C1=CC=C(C(=C1)C(=O)O[C@H]2[C@@H]([C@H]([C@@H]([C@H](O2)CO)O)O)O)O	XNHKMZHWRNMFCU-HMUNZLOLSA-N	Organic oxygen compounds	Organooxygen compounds	Carbohydrates and carbohydrate conjugates
4-O-Glucosyl-sinapate
4-O-?-D-glucopyranosylferulic%20acid
5-Hydroxyferuloylquinic%20acid
5-O-Feruloylquinic%20acid%20Glucoside
5-O-p-Coumaroylquinic%20acid
5-O-p-Coumaroylshikimic%20acid%20O-glucoside
6'-O-Feruloyl-D-sucrose
6'-O-Sinapoylsucrose	COC1=CC(=CC(=C1O)OC)C=CC(=O)OC2C(C(OC2(CO)OC3C(C(C(C(O3)CO)O)O)O)CO)O	WTCVROXOIQEIRC-IBVGEFGBSA-N	Phenylpropanoids and polyketides	Cinnamic acids and derivatives	Hydroxycinnamic acids and derivatives
6-O-Feruloyl-?-D-glucose	COC1=C(C=CC(=C1)/C=C/C(=O)OC[C@H]([C@H]([C@@H]([C@H](C=O)O)O)O)O)O	SQBITMSCIPALTP-LFJMMHPDSA-N	Phenylpropanoids and polyketides	Cinnamic acids and derivatives	Hydroxycinnamic acids and derivatives
6-O-Galloyl-?-D-glucose	C1=C(C=C(C(=C1O)O)O)C(=O)OC[C@H]([C@H]([C@@H]([C@H](C=O)O)O)O)O	SMZJCCHIPATQCN-LUTQBAROSA-N	Benzenoids	Benzene and substituted derivatives	Benzoic acids and derivatives
6-O-p-Coumaroyl-?-D-glucose	C1=CC(=CC=C1/C=C/C(=O)OCC2C(C(C(C(O2)O)O)O)O)O	GKUSDFCBGXFHIL-ZZXKWVIFSA-N	Phenylpropanoids and polyketides	Cinnamic acids and derivatives	Hydroxycinnamic acids and derivatives
Aloesone-7-O-?-D-glucoside
Anthranilate-1-O-Sophoroside
Chlorogenic%20acid%20(3-O-Caffeoylquinic%20acid)	C1[C@H]([C@H]([C@@H](C[C@@]1(C(=O)O)O)OC(=O)/C=C/C2=CC(=C(C=C2)O)O)O)O	CWVRJTMFETXNAD-JUHZACGLSA-N	Organic oxygen compounds	Organooxygen compounds	Alcohols and polyols
Cryptochlorogenic%20acid%20(4-O-Caffeoylquinic%20acid)	C1[C@H](C([C@@H](CC1(C(=O)O)O)O)OC(=O)/C=C/C2=CC(=C(C=C2)O)O)O	GYFFKZTYYAFCTR-AVXJPILUSA-N	Organic oxygen compounds	Organooxygen compounds	Alcohols and polyols
Dicaffeoylquinic%20acid-O-glucoside
Dicaffeoylshikimic%20acid
Dihydrosinapic%20Acid%20glucoside
Disinapoyl%20glucoside
Ferulic%20acid-4-O-glucoside	COC1=C(C=CC(=C1)C=CC(=O)O)O[C@H]2[C@@H]([C@H]([C@@H]([C@H](O2)CO)O)O)O	IEMIRSXOYFWPFD-YMILTQATSA-N	Organic oxygen compounds	Organooxygen compounds	Carbohydrates and carbohydrate conjugates
Gentisic%20acid%202-O-(6''-O-Feruloyl)Glucoside
Ginkgoside%20A
Grevilloside%20F	C1=C(C=C(C=C1O)O[C@H]2[C@@H]([C@H]([C@@H]([C@H](O2)CO)O)O)O)/C=C/C(=O)O	XNMPDWAFCXKFCV-KAWQJHCCSA-N	Organic oxygen compounds	Organooxygen compounds	Carbohydrates and carbohydrate conjugates
Homovanilloylquinic%20acid
Hydroxyferulic%20acid%20glucoside
Hydroxyterephthalic%20acid%20O-(6''-O-Benzoyl)Glucoside
Neochlorogenic%20acid%20(5-O-Caffeoylquinic%20acid)	C1[C@H]([C@H]([C@@H](C[C@@]1(C(=O)O)O)OC(=O)/C=C/C2=CC(=C(C=C2)O)O)O)O	CWVRJTMFETXNAD-JUHZACGLSA-N	Organic oxygen compounds	Organooxygen compounds	Alcohols and polyols
Ningposide%20A
O-Caffeoyl%20maltotriose
Orobanchoside
Phenylpropionic%20acid-O-?-D-glucopyranoside
Protocatechuic%20acid%201-O-Rutinoside
Protocatechuic%20acid%20glucosyl%20xyloside
Protocatechuic%20acid-4-O-glucoside
Quinacyl%20syringic%20acid
Salicin%206'-O-Ferulate
Salicin%206'-O-Salicylate
Salicin%207-O-Ferulate
Salicylic%20acid-2-O-glucoside
Salicyloylsalicin	C1=CC=C(C(=C1)COC(=O)C2=CC=CC=C2O)O[C@@H]3[C@@H]([C@H]([C@@H]([C@H](O3)CO)O)O)O	YHBIHSCTXBGAIK-NUABRCLCSA-N	Organic oxygen compounds	Organooxygen compounds	Carbohydrates and carbohydrate conjugates
Salicyolylsalicortin
Salsaside%20B	C[C@H]1[C@@H]([C@H]([C@H]([C@@H](O1)O[C@@H]2[C@H]([C@@H](O[C@@H]([C@H]2OC(=O)/C=C/C3=CC(=C(C=C3)O)O)CO)OCC4=CC=CC=C4)O)O)O)O	VMYFBCWFVXYOHC-KZFXXQJMSA-N	Phenylpropanoids and polyketides	Cinnamic acids and derivatives	Hydroxycinnamic acids and derivatives
Sinapaldehyde-4-O-Glucoside	COC1=CC(=CC(=C1O[C@H]2[C@@H]([C@H]([C@@H]([C@H](O2)CO)O)O)O)OC)/C=C/C=O	OYTCTPHTVUEGCL-GCPOEHJPSA-N	Organic oxygen compounds	Organooxygen compounds	Carbohydrates and carbohydrate conjugates
Vnilloylmalic%20acid
Vnilloyltartaric%20acid
gentisic%20acid%205-O-?-D-(6'-O-galloyl)-gluco-pyranoside
p-Coumaric%20acid-4-O-glucoside	C1=CC(=CC=C1/C=C/C(=O)O)OC2C(C(C(C(O2)CO)O)O)O	LJFYQZQUAULRDF-ZZXKWVIFSA-N	Organic oxygen compounds	Organooxygen compounds	Carbohydrates and carbohydrate conjugates
3-Hydroxycinnamic%20Acid	C1=CC(=CC(=C1)O)/C=C/C(=O)O	KKSDGJDHHZEWEP-SNAWJCMRSA-N	Phenylpropanoids and polyketides	Cinnamic acids and derivatives	Hydroxycinnamic acids and derivatives
Beta-Hydroxyacteoside	C[C@H]1[C@@H]([C@H]([C@H]([C@@H](O1)O[C@@H]2[C@H]([C@@H](O[C@@H]([C@H]2OC(=O)/C=C/C3=CC(=C(C=C3)O)O)CO)OCC(C4=CC(=C(C=C4)O)O)O)O)O)O)O	XDAXWJHQKZRSEY-XHJPSFMXSA-N	Phenylpropanoids and polyketides	Cinnamic acids and derivatives	Hydroxycinnamic acids and derivatives
5,15-O-Dimethyl%20morindol
Anthragallol%202-Methyl%20Ether;%201,3-Dihydroxy-2-methoxyanthraquinone	COC1=C(C=C2C(=C1O)C(=O)C3=CC=CC=C3C2=O)O	JHNIAAKMKICMPB-UHFFFAOYSA-N	Benzenoids	Anthracenes	Anthraquinones
Danthron;%201,8-Dihydroxyanthraquinone	C1=CC2=C(C(=C1)O)C(=O)C3=C(C2=O)C=CC=C3O	QBPFLULOKWLNNW-UHFFFAOYSA-N	Benzenoids	Anthracenes	Anthraquinones
Hedycaffeoylglucoside%20A
Lasianthuoside%20A	COC1=C2C(=CC(=C1CO)O[C@H]3[C@@H]([C@H]([C@@H]([C@H](O3)CO)O)O)O)C(=O)C4=CC=CC=C4C2=O	SYWNPFLHKSCNDM-MNKKRNMXSA-N	Benzenoids	Anthracenes	Anthraquinones
Rhein-8-O-glucoside
1,4,8-Trihydroxynaphthalene-1-O-glucoside
4,5,8-Trihydroxy-?-tetralone
Torachrysone-8-O-(6''-acetyl)glucoside
7-hydroxy-4-methoxyphenanthrene-2-O-glucoside
Dihydrojuglone
5,8-Epidioxyergosta-6,22-dien-3-ol%20(Ergosterol%20peroxide)
12(13?14)Abeospirost-5,13(18)-diene-1,3,15-triol%20(Dracaenogenin%20A)
Diosgenin-3-O-glucosyl(1?4)galactoside%20(Funkioside%20C,Capsicoside%20B3)
3-O-Methylellagic%20acid%204'-sulfate
3-O-Methylellagic%20acid%204-sulfate
Ellagic%20acid-4-O-Xyloside
11?-Hydroxy-8,15-isopimaradiene-4-one
12-Hydroxyhydromethylabietate
14-Didehydrovouacapane-5a-ol
20-nor-cofaryloside%20I
3-Acetoxy-9,13-epoxy-16-hydroxy-labda-15,16-olide
3?,12-dihydroxy-13-methyl-podocarpane-8,10,13-tiene
7-Oxo-pimara-1,8a,11,15-Tetraen-19-ol
7-Oxo-pimara-5,8,11,15-Tetraen-19-ol
7-Hydroxydarutigenol	C[C@@]1(CC[C@@H]2C(=C1)[C@H](C[C@H]3[C@]2(CC[C@H](C3(C)C)O)C)O)[C@H](CO)O	BIPACBIPISLDRK-IFWNTPBBSA-N	Lipids and lipid-like molecules	Prenol lipids	Diterpenoids
Ent-15-oxo-2?,16,19-trihydroxypimar-8(14)-ene
Laminaran	OCC1OC(OC2C(O)C(CO)OC(OC3C(O)C(O)OC(CO)C3O)C2O)C(O)C(O)C1O.OC[C@H]1OC(O[C@H]2[C@H](O)[C@@H](CO)OC(O[C@H]3[C@H](O)[C@@H](CO)OC(O)[C@@H]3O)[C@@H]2O)[C@H](O)[C@@H](O)[C@@H]1O.OC[C@H]1O[C@@H](O[C@@H]2[C@@H](O)[C@H](O[C@@H]3[C@@H](O)[C@@H](O)O[C@H](CO)[C@H]3O)O[C@H](CO)[C@H]2O)[C@H](O)[C@@H](O)[C@@H]1O	TWZRNUSDBNEHQT-AVWKIHAXSA-N	Organic oxygen compounds	Organooxygen compounds	Carbohydrates and carbohydrate conjugates
Mascaroside%20III
Mascaroside%20IV
Siegesbeckic%20acid
Villanovane%20I
Vitetrifolin%20H
phyllanflexoid%20A
10-Dehydrogeniposide
11-methoxy%20viburtinal
2'-(2,3-Dihydroxybenzoyl)gentiopicroside
2'-Feruloyl-Mussaenosidic%20Acid
6'-O-Sinapoylgeniposide
6'-O-Sinapoyljasminoside%20B
6'-O-Sinapoyljasminoside%20C
6'-O-Sinapoyljasminoside%20L
8-Epikingiside	C[C@@H]1[C@@H]2[C@H](CC(=O)O1)C(=CO[C@H]2O[C@H]3[C@@H]([C@H]([C@@H]([C@H](O3)CO)O)O)O)C(=O)OC	QZCJFXSHMSZCLH-XICRDADBSA-N	Organic oxygen compounds	Organooxygen compounds	Carbohydrates and carbohydrate conjugates
Acetoxypaederoside
Acetylasperuloside
Acetylpaederoside
Arabinosylasperuloside
Aseleposide%20E
Caffeylscandoside
D-Linalool%203-(6''-glucosyl)glucoside
Dehydroscandoside
Dehydroxypaederosidic%20Acid
Dihydropenstemide	CC(C)CC(=O)O[C@H]1[C@@H]2[C@H](CC[C@@H]2C(=CO1)CO[C@H]3[C@@H]([C@H]([C@@H]([C@H](O3)CO)O)O)O)CO	FWDIAJPSCYINIU-BKVOUIIGSA-N	Lipids and lipid-like molecules	Prenol lipids	Terpene glycosides
Dimethylasperuloside
Feruloylscandoside	COC1=C(C=CC(=C1)/C=C/C(=O)OCC2=C[C@H]([C@H]3[C@@H]2[C@@H](OC=C3C(=O)O)O[C@H]4[C@@H]([C@H]([C@@H]([C@H](O4)CO)O)O)O)O)O	KUXQVYZFGZMYDL-UGMRMKFXSA-N	Lipids and lipid-like molecules	Prenol lipids	Terpene glycosides
Genipin-1-O-(2''-O-apiosyl)glucoside
Glucosyl%20Corchoionoside%20C
Hydroxysecologanic%20acid
Jasminoside%20C	CC1(CC(=O)C=C(C1=C)CO[C@H]2[C@@H]([C@H]([C@@H]([C@H](O2)CO)O)O)O)C	KUSKILNIKZVCRA-UXXRCYHCSA-N	Organic oxygen compounds	Organooxygen compounds	Carbohydrates and carbohydrate conjugates
Methylasperuloside
Methylpaederoside
Vomifoliol-D-glucopyranoside	CC1=CC(=O)CC([C@]1(C=C[C@@H](C)O[C@H]2[C@@H]([C@H]([C@@H]([C@H](O2)CO)O)O)O)O)(C)C	SWYRVCGNMNAFEK-SUHXYMONSA-N	Lipids and lipid-like molecules	Fatty Acyls	Fatty acyl glycosides
angustiamarin	COC1=C(C=CC(=C1)/C=C/C(=O)O[C@H]2[C@H](O[C@H]([C@@H]([C@@H]2O)O)OC3[C@@H]([C@@]4(CCOC(=O)C4=CO3)O)C=C)CO)O	YZIHSPLEUDRBMV-PMSFWTMUSA-N	Phenylpropanoids and polyketides	Cinnamic acids and derivatives	Hydroxycinnamic acids and derivatives
11,12-O-Isopropyfidenesolajiangxin%20F
15-Hydroxysessilifol%20F	C[C@@]12CC[C@H](C([C@H]1CC(=O)C3=C[C@@](CC[C@@H]23)(C(C)(C)O)OC)(C)C)O	BISGOUKOZBTUKD-WOUGYZGKSA-N	Lipids and lipid-like molecules	Prenol lipids	Diterpenoids
1?-Hydroxy-?-cyperone
3-Hydroxy-3,7,11-trimethyldodeca-1,6E,10-trien-9-yl%20isobutyrate
3-Oxo-Alpha-Ionol%20diglucoside
3-Oxo-alpha-ionol%20glucoside	CC1=CC(=O)CC(C1C=CC(C)OC2C(C(C(C(O2)CO)O)O)O)(C)C	SZOPSAFLRCYJCX-UHFFFAOYSA-N	Lipids and lipid-like molecules	Fatty Acyls	Fatty acyl glycosides
30-Hydroxyfraxinellone	C[C@@]12CCCC(=C1C(=O)O[C@H]2C3=COC=C3)CO	WIVNSULEOZPIDB-GXTWGEPZSA-N	Organoheterocyclic compounds	Isobenzofurans	Unassigned
6,9-Dihydroxy-7-megastigmen-3-one
9-Hydroxyselina-3,11-dien-12-al
9-hydroxyeudesma-3,11(13)-dien-12-methyl%20ester
Chloranthalic%20acid	C/C(=C/1\C[C@@H]2[C@](CCC[C@@]2(C)O)(CC1=O)C)/C(=O)O	CYQHVFHYCZDSIE-KGJNJRFFSA-N	Lipids and lipid-like molecules	Prenol lipids	Sesquiterpenoids
Dihydrovomifoliol-O-?-D-glucoside
Hydroxysonchuside%20F
Platanionoside%20B	CC1=C(C(C[C@@H](C1)O[C@H]2[C@@H]([C@H]([C@@H]([C@H](O2)CO)O)O)O)(C)C)/C=C/C(C)O[C@H]3[C@@H]([C@H]([C@@H]([C@H](O3)CO)O)O)O	SVBLMGMQUNCYLI-WAAPROKXSA-N	Lipids and lipid-like molecules	Prenol lipids	Terpene glycosides
isopolygodial	C[C@]12CCCC([C@@H]1CC=C([C@H]2C=O)C=O)(C)C	AZJUJOFIHHNCSV-VNHYZAJKSA-N	Organic oxygen compounds	Organic oxides	Unassigned
21?-Hydroxyserrat-14-en-3?-yl%20propanedioic%20acid%20mono%20ester
Ceriopsin%20B	C[C@]12CCC[C@@]([C@@H]1CC[C@]34[C@@H]2CC[C@](C3)([C@@H](C4)O)CO)(C)C(=O)OC	QUWSFOAAHUTMOI-NDNUHCHRSA-N	Lipids and lipid-like molecules	Prenol lipids	Diterpenoids
1,3-Dihydroxyurs-12-en-28-oic%20acid%20(Kaneric%20acid)
1-Deacetylnimbolinin%20A	CC1=C2[C@H](C[C@H]1C3=COC=C3)O[C@H](C[C@H]4[C@]2([C@@H]([C@H]5[C@@H]6[C@@]4([C@H](C[C@H]([C@]6(CO5)C)OC(=O)C)O)C)OC(=O)C7=CC=CC=C7)C)O	YVLWZIULQNWYGW-GWFJOCPGSA-N	Lipids and lipid-like molecules	Prenol lipids	Triterpenoids
11-Hydroxy-3-oxours-12-en-28-oic%20acid
2,19-Dihydroxy-3-oxours-12-en-28-oic%20acid	C[C@@H]1CC[C@@]2(CC[C@@]3(C(=CC[C@H]4[C@]3(CC[C@@H]5[C@@]4(C[C@H](C(=O)C5(C)C)O)C)C)[C@@H]2[C@]1(C)O)C)C(=O)O	LJORXTIGOHMBOS-OTRVPSFMSA-N	Lipids and lipid-like molecules	Prenol lipids	Triterpenoids
2,3-Dihydroxylup-20(29)-en-28-oic%20acid%20(Alphitolic%20acid)
2,3-Dihydroxyolean-12-en-28-oic%20acid%20(2-Hydroxyoleanolic%20acid)
2,3-Dihydroxyoleana-11,13(18)-dien-28-oic%20acid%20(Camaldulenic%20acid)
2,3-Dihydroxyurs-12-en-28-oic%20acid%20(Corosolic%20acid)	C[C@@H]1CC[C@@]2(CC[C@@]3(C(=CC[C@H]4[C@]3(CC[C@@H]5[C@@]4(C[C@H]([C@@H](C5(C)C)O)O)C)C)[C@@H]2[C@H]1C)C)C(=O)O	HFGSQOYIOKBQOW-ZSDYHTTISA-N	Lipids and lipid-like molecules	Prenol lipids	Triterpenoids
2,3-Dihydroxyurs-12-en-29-oic%20acid%20(Maslinic%20acid)
2-Carboxy-3-hydroxy-A(1)-norlupan-20(29)-en-28-oic%20acid%20(Ceanothic%20acid)	CC(=C)[C@@H]1CC[C@]2([C@H]1[C@H]3CC[C@H]4[C@]([C@@]3(CC2)C)(CC[C@@H]5[C@@]4([C@H]([C@@H](C5(C)C)O)C(=O)O)C)C)C(=O)O	WLCHQSHZHFLMJH-VILVJDKQSA-N	Lipids and lipid-like molecules	Prenol lipids	Triterpenoids
27,28-Dicarboxyl%20ursolic%20acid
2?,3?-Dihydroxyolean-12-en-28-oic%20acid	C[C@@]12CC[C@@H]3[C@@]([C@H]1CC=C4[C@]2(CC[C@@]5([C@H]4CC(CC5)(C)C)C(=O)O)C)(C[C@H]([C@@H](C3(C)C)O)O)C	MDZKJHQSJHYOHJ-LLICELPBSA-N	Lipids and lipid-like molecules	Prenol lipids	Triterpenoids
3,13,15-Trihydroxyoleanane-12-one
3,19,23-Trihydroxyurs-12-en-28-oic%20acid%20(Barbinervic%20acid)	C[C@@H]1CC[C@@]2(CC[C@@]3(C(=CC[C@H]4[C@]3(CC[C@@H]5[C@@]4(CC[C@H]([C@]5(C)CO)O)C)C)[C@@H]2[C@]1(C)O)C)C(=O)O	YLHQFGOOMKJFLP-JGLQYCRZSA-N	Lipids and lipid-like molecules	Prenol lipids	Triterpenoids
3,19,23-Trihydroxyurs-12-en-28-oic%20acid%20(Rutundic%20acid)	C[C@@H]1CC[C@@]2(CC[C@@]3(C(=CC[C@H]4[C@]3(CC[C@@H]5[C@@]4(CC[C@@H]([C@@]5(C)CO)O)C)C)[C@@H]2[C@]1(C)O)C)C(=O)O	YLHQFGOOMKJFLP-LTFXOGOQSA-N	Lipids and lipid-like molecules	Prenol lipids	Triterpenoids
3,19-Dihydroxyurs-12-en-28-oic%20acid%20(Pomolic%20acid)	C[C@@H]1CC[C@@]2(CC[C@@]3(C(=CC[C@H]4[C@]3(CC[C@@H]5[C@@]4(CC[C@@H](C5(C)C)O)C)C)[C@@H]2[C@]1(C)O)C)C(=O)O	ZZTYPLSBNNGEIS-OPAXANQDSA-N	Lipids and lipid-like molecules	Prenol lipids	Triterpenoids
3,23-Dihydroxy-30-noroleana-12,20(29)-dien-28-oic%20acid%20(30-Norhederagenin)	C[C@]12CC[C@@H]([C@@]([C@@H]1CC[C@@]3([C@@H]2CC=C4[C@]3(CC[C@@]5([C@H]4CC(=C)CC5)C(=O)O)C)C)(C)CO)O	FKUBIEWSGBVADJ-VZBPFLCRSA-N	Lipids and lipid-like molecules	Steroids and steroid derivatives	Unassigned
3,23-Dihydroxylup-20(29)-en-28-oic%20acid%20(23-Hydroxybetulinic%20acid)	CC(=C)[C@@H]1CC[C@]2([C@H]1[C@H]3CC[C@@H]4[C@]5(CC[C@@H]([C@@]([C@@H]5CC[C@]4([C@@]3(CC2)C)C)(C)CO)O)C)C(=O)O	HXWLKAXCQLXHML-WGOZWDAUSA-N	Lipids and lipid-like molecules	Prenol lipids	Triterpenoids
3,28-Dihydroxylup-20(29)-ene%20(Betulin)	CC(=C)[C@@H]1CC[C@]2([C@H]1[C@H]3CC[C@@H]4[C@]5(CC[C@@H](C([C@@H]5CC[C@]4([C@@]3(CC2)C)C)(C)C)O)C)CO	FVWJYYTZTCVBKE-ROUWMTJPSA-N	Lipids and lipid-like molecules	Prenol lipids	Triterpenoids
3-Hydroxy-11-oxours-12-en-28-oic%20acid%20(11-Keto-ursolic%20acid)	C[C@@H]1CC[C@@]2(CC[C@@]3(C(=CC(=O)[C@H]4[C@]3(CC[C@@H]5[C@@]4(CC[C@@H](C5(C)C)O)C)C)[C@@H]2[C@H]1C)C)C(=O)O	MDQJVSLVPQYJLP-HUWCOUCRSA-N	Lipids and lipid-like molecules	Prenol lipids	Triterpenoids
3-Hydroxycycloarta-24-ene-26-oic%20acid%20(Isomangiferolic%20acid)	C[C@H](CC/C=C(\C)/C(=O)O)[C@H]1CC[C@@]2([C@@]1(CC[C@]34[C@H]2CC[C@@H]5[C@]3(C4)CC[C@H](C5(C)C)O)C)C	CYHOTEDWAOHQLA-AKGXXHIGSA-N	Lipids and lipid-like molecules	Steroids and steroid derivatives	Cycloartanols and derivatives
3-Hydroxylup-20(29)-en-28-oic%20acid%20(Betulinic%20acid)	CC(=C)[C@@H]1CC[C@]2([C@H]1[C@H]3CC[C@@H]4[C@]5(CC[C@@H](C([C@@H]5CC[C@]4([C@@]3(CC2)C)C)(C)C)O)C)C(=O)O	QGJZLNKBHJESQX-FZFNOLFKSA-N	Lipids and lipid-like molecules	Prenol lipids	Triterpenoids
3-Hydroxyolean-12-en-28-oic%20acid%20(Oleanolic%20acid)	C[C@]12CC[C@@H](C([C@@H]1CC[C@@]3([C@@H]2CC=C4[C@]3(CC[C@@]5([C@H]4CC(CC5)(C)C)C(=O)O)C)C)(C)C)O	MIJYXULNPSFWEK-GTOFXWBISA-N	Lipids and lipid-like molecules	Prenol lipids	Triterpenoids
3-Hydroxyurs-12-en-28-oic%20acid%20(3-Epiursolic%20acid)	C[C@@H]1CC[C@@]2(CC[C@@]3(C(=CC[C@H]4[C@]3(CC[C@@H]5[C@@]4(CC[C@H](C5(C)C)O)C)C)[C@@H]2[C@H]1C)C)C(=O)O	WCGUUGGRBIKTOS-XHINXETDSA-N	Lipids and lipid-like molecules	Prenol lipids	Triterpenoids
3-Hydroxyurs-12-en-28-oic%20acid%20(Ursolic%20acid)	C[C@@H]1CC[C@@]2(CC[C@@]3(C(=CC[C@H]4[C@]3(CC[C@@H]5[C@@]4(CC[C@@H](C5(C)C)O)C)C)[C@@H]2[C@H]1C)C)C(=O)O	WCGUUGGRBIKTOS-GPOJBZKASA-N	Lipids and lipid-like molecules	Prenol lipids	Triterpenoids
3-Hydroxyurs-12-ene-27,28-dioic%20acid%20(Quinovic%20acid)	C[C@@H]1CC[C@@]2(CC[C@@]3(C(=CC[C@H]4[C@]3(CC[C@@H]5[C@@]4(CC[C@@H](C5(C)C)O)C)C)[C@@H]2[C@H]1C)C(=O)O)C(=O)O	OJUYFGQEMPENCE-DPKHZRJYSA-N	Lipids and lipid-like molecules	Prenol lipids	Triterpenoids
3-Oxolanosta-8,24-dien-21-oic%20acid%20(Beta-Elemonic%20acid)	CC(=CCC[C@@H]([C@H]1CC[C@]2([C@]1(CCC3=C2CC[C@H]4[C@@]3(CCC(=O)C4(C)C)C)C)C)C(=O)O)C	XLPAINGDLCDYQV-DXXDIINSSA-N	Lipids and lipid-like molecules	Prenol lipids	Triterpenoids
3-Oxolanosta-9(11),24-dien-26-oic%20acid%20(Coccinic%20Acid)	CC(CC/C=C(/C)\C(=O)O)C1CCC2(C1(CC=C3C2CCC4C3(CCC(=O)C4(C)C)C)C)C	HGNBFRRLBCNAAD-JMIUGGIZSA-N	Lipids and lipid-like molecules	Prenol lipids	Triterpenoids
Lup-20(29)-en-3-one%20(Lupenone)	CC(=C)[C@@H]1CC[C@]2([C@H]1[C@H]3CC[C@@H]4[C@]5(CCC(=O)C([C@@H]5CC[C@]4([C@@]3(CC2)C)C)(C)C)C)C	GRBHNQFQFHLCHO-BHMAJAPKSA-N	Lipids and lipid-like molecules	Prenol lipids	Triterpenoids
Lup-20(29)-ene-1,3-diol%20(Glochidiol)	CC(=C)[C@@H]1CC[C@]2([C@H]1[C@H]3CC[C@H]4[C@]([C@@]3(CC2)C)(CC[C@@H]5[C@@]4([C@@H](C[C@@H](C5(C)C)O)O)C)C)C	SWEUJTWPRYKNNX-AXLUDCLJSA-N	Lipids and lipid-like molecules	Prenol lipids	Triterpenoids
Quinovic%20acid-3-O-rhamnoside	CC1CCC2(CCC3(C(=CCC4C3(CCC5C4(CCC(C5(C)C)OC6C(C(C(C(O6)C)O)O)O)C)C)C2C1C)C(=O)O)C(=O)O	PUOQHFWXBKTHST-UHFFFAOYSA-N	Lipids and lipid-like molecules	Prenol lipids	Terpene glycosides
6-methoxyhexanoic%20sulfuric%20anhydride	S(O)(=O)(=O)OC(CCCCCOC)=O	SCGSISSIGGHKGN-UHFFFAOYSA-N	Organic acids and derivatives	Organic sulfuric acids and derivatives	Sulfuric acid esters
Rubianol-g	CC(C)[C@@H]1C[C@H]([C@H]2[C@]1(CC[C@@]3([C@@]2(CC=C4[C@H]3[C@H](C[C@@H]5[C@@]4(C=CC(=O)C5(C)C)C)O)C)C)CO)O	LKBSFVITHXLCDA-MEKJSECDSA-N	Lipids and lipid-like molecules	Prenol lipids	Triterpenoids
Rubione%20C
Rubione%20D
Uncargenin%20C;%203?,6?,23-Trihydroxyolean-12-en-28-oic%20acid
2,3,19-Trihydroxyolean-12-en-28-oic%20acid-28-O-glucoside
2,3,23-Trihydroxyolean-12,18(19)-dien-28-oic%20acid-glucoside
3,23-Dihydroxy-24-oxo-olean-12-en-28-oic%20acid-28-O-glucoside
3-O-Glucosyl-2,3-dihydroxy-30-norolean-12,20(29)-diene-23,28-dioic%20acid-23,28-di-O-glucosyl%20ester
Pro-Ile-Asp	CCC(C)C(C(=O)NC(CC(=O)O)C(=O)O)NC(=O)C1CCCN1	AQGUSRZKDZYGGV-UHFFFAOYSA-N	Organic acids and derivatives	Carboxylic acids and derivatives	Amino acids, peptides, and analogues
Pro-Leu-Thr	CC(C)CC(C(=O)NC(C(C)O)C(=O)O)NC(=O)C1CCCN1	VTFXTWDFPTWNJY-UHFFFAOYSA-N	Organic acids and derivatives	Carboxylic acids and derivatives	Amino acids, peptides, and analogues
Pro-Pro-Leu	CC(C)CC(C(=O)O)NC(=O)C1CCCN1C(=O)C2CCCN2	CGSOWZUPLOKYOR-UHFFFAOYSA-N	Organic acids and derivatives	Carboxylic acids and derivatives	Amino acids, peptides, and analogues
Pro-Thr-Ile	CCC(C)C(C(=O)O)NC(=O)C(C(C)O)NC(=O)C1CCCN1	CHYAYDLYYIJCKY-UHFFFAOYSA-N	Organic acids and derivatives	Carboxylic acids and derivatives	Amino acids, peptides, and analogues
Pro-Trp	C1CC(NC1)C(=O)NC(CC2=CNC3=CC=CC=C32)C(=O)O	UEKYKRQIAQHOOZ-UHFFFAOYSA-N	Organic acids and derivatives	Carboxylic acids and derivatives	Amino acids, peptides, and analogues
Pro-Tyr-Asp	C1CC(NC1)C(=O)NC(CC2=CC=C(C=C2)O)C(=O)NC(CC(=O)O)C(=O)O	CWZUFLWPEFHWEI-UHFFFAOYSA-N	Organic acids and derivatives	Carboxylic acids and derivatives	Amino acids, peptides, and analogues
Pro-Val-Leu	CC(C)CC(C(=O)O)NC(=O)C(C(C)C)NC(=O)C1CCCN1	KHRLUIPIMIQFGT-UHFFFAOYSA-N	Organic acids and derivatives	Carboxylic acids and derivatives	Amino acids, peptides, and analogues
PyroGlu-Ile	CCC(C)C(C(=O)O)NC(=O)C1CCC(=O)N1	MKCVLTRITQNGQI-UHFFFAOYSA-N	Organic acids and derivatives	Carboxylic acids and derivatives	Amino acids, peptides, and analogues
S-hexyl-L-glutathione	CCCCCCSC[C@H](NC(=O)CC[C@H](N)C(O)=O)C(=O)NCC(O)=O	HXJDWCWJDCOHDG-RYUDHWBXSA-N	Organic acids and derivatives	Carboxylic acids and derivatives	Amino acids, peptides, and analogues
Ser-Glu	NC(CO)C(=O)NC(CCC(O)=O)C(O)=O	LAFKUZYWNCHOHT-UHFFFAOYSA-N	Organic acids and derivatives	Carboxylic acids and derivatives	Amino acids, peptides, and analogues
Ser-Gly-Ile	CCC(C)C(C(=O)O)NC(=O)CNC(=O)C(CO)N	IOVHBRCQOGWAQH-UHFFFAOYSA-N	Organic acids and derivatives	Carboxylic acids and derivatives	Amino acids, peptides, and analogues
Ser-Gly-Phe	C1=CC=C(C=C1)CC(C(=O)O)NC(=O)CNC(=O)C(CO)N	JFWDJFULOLKQFY-UHFFFAOYSA-N	Organic acids and derivatives	Carboxylic acids and derivatives	Amino acids, peptides, and analogues
Ser-Ile-Asn	CCC(C)C(C(=O)NC(CC(=O)N)C(=O)O)NC(=O)C(CO)N	LQESNKGTTNHZPZ-UHFFFAOYSA-N	Organic acids and derivatives	Carboxylic acids and derivatives	Amino acids, peptides, and analogues
Ser-Ile-Asp	CCC(C)C(C(=O)NC(CC(=O)O)C(=O)O)NC(=O)C(CO)N	BKZYBLLIBOBOOW-UHFFFAOYSA-N	Organic acids and derivatives	Carboxylic acids and derivatives	Amino acids, peptides, and analogues
Ser-Ile-Phe	CCC(C)C(C(=O)NC(CC1=CC=CC=C1)C(=O)O)NC(=O)C(CO)N	LWMQRHDTXHQQOV-UHFFFAOYSA-N	Organic acids and derivatives	Carboxylic acids and derivatives	Amino acids, peptides, and analogues
Ser-Leu	CC(C)C[C@H](NC(=O)[C@H](N)CO)C(O)=O	NFDYGNFETJVMSE-RQJHMYQMSA-N	Organic acids and derivatives	Carboxylic acids and derivatives	Amino acids, peptides, and analogues
Ser-Leu-Arg	CC(C)CC(C(=O)NC(CCCN=C(N)N)C(=O)O)NC(=O)C(CO)N	QYSFWUIXDFJUDW-UHFFFAOYSA-N	Organic acids and derivatives	Carboxylic acids and derivatives	Amino acids, peptides, and analogues
Ser-Leu-Leu	CC(C)CC(C(=O)NC(CC(C)C)C(=O)O)NC(=O)C(CO)N	VMLONWHIORGALA-UHFFFAOYSA-N	Organic acids and derivatives	Carboxylic acids and derivatives	Amino acids, peptides, and analogues
Ser-Lys	C(CCN)CC(C(=O)O)NC(=O)C(CO)N	SBMNPABNWKXNBJ-UHFFFAOYSA-N	Organic acids and derivatives	Carboxylic acids and derivatives	Amino acids, peptides, and analogues
Ser-Thr-Ile	CCC(C)C(C(=O)O)NC(=O)C(C(C)O)NC(=O)C(CO)N	FLMYSKVSDVHLEW-UHFFFAOYSA-N	Organic acids and derivatives	Carboxylic acids and derivatives	Amino acids, peptides, and analogues
Ser-Trp	C1=CC=C2C(=C1)C(=CN2)CC(C(=O)O)NC(=O)C(CO)N	LZLREEUGSYITMX-UHFFFAOYSA-N	Organic acids and derivatives	Carboxylic acids and derivatives	Amino acids, peptides, and analogues
Ser-Val	CC(C)C(C(=O)O)NC(=O)C(CO)N	ILVGMCVCQBJPSH-UHFFFAOYSA-N	Organic acids and derivatives	Carboxylic acids and derivatives	Amino acids, peptides, and analogues
Ser-Val-Leu	CC(C)CC(C(=O)O)NC(=O)C(C(C)C)NC(=O)C(CO)N	YEDSOSIKVUMIJE-UHFFFAOYSA-N	Organic acids and derivatives	Carboxylic acids and derivatives	Amino acids, peptides, and analogues
Thr-Glu-Ile	CCC(C)C(C(=O)O)NC(=O)C(CCC(=O)O)NC(=O)C(C(C)O)N	JMGJDTNUMAZNLX-UHFFFAOYSA-N	Organic acids and derivatives	Carboxylic acids and derivatives	Amino acids, peptides, and analogues
Thr-Lys	CC(C(C(=O)NC(CCCCN)C(=O)O)N)O	YKRQRPFODDJQTC-UHFFFAOYSA-N	Organic acids and derivatives	Carboxylic acids and derivatives	Amino acids, peptides, and analogues
Thr-Lys-Gly	CC(C(C(=O)NC(CCCCN)C(=O)NCC(=O)O)N)O	JLNMFGCJODTXDH-UHFFFAOYSA-N	Organic acids and derivatives	Carboxylic acids and derivatives	Amino acids, peptides, and analogues
Thr-Met-Glu	CC(C(C(=O)NC(CCSC)C(=O)NC(CCC(=O)O)C(=O)O)N)O	MCDVZTRGHNXTGK-UHFFFAOYSA-N	Organic acids and derivatives	Carboxylic acids and derivatives	Amino acids, peptides, and analogues
Thr-Trp	CC(C(C(=O)NC(CC1=CNC2=CC=CC=C21)C(=O)O)N)O	KAFKKRJQHOECGW-UHFFFAOYSA-N	Organic acids and derivatives	Carboxylic acids and derivatives	Amino acids, peptides, and analogues
Thr-Tyr	CC(C(C(=O)NC(CC1=CC=C(C=C1)O)C(=O)O)N)O	WCRFXRIWBFRZBR-UHFFFAOYSA-N	Organic acids and derivatives	Carboxylic acids and derivatives	Amino acids, peptides, and analogues
Trp-Asn	C1=CC=C2C(=C1)C(=CN2)CC(C(=O)NC(CC(=O)N)C(=O)O)N	GRQCSEWEPIHLBI-UHFFFAOYSA-N	Organic acids and derivatives	Carboxylic acids and derivatives	Amino acids, peptides, and analogues
Trp-Gly	N[C@@H](Cc1c[nH]c2ccccc12)C(=O)NCC(O)=O	UYKREHOKELZSPB-JTQLQIEISA-N	Organic acids and derivatives	Carboxylic acids and derivatives	Amino acids, peptides, and analogues
Trp-Ile	CCC(C)C(C(=O)O)NC(=O)C(CC1=CNC2=CC=CC=C21)N	PITVQFJBUFDJDD-UHFFFAOYSA-N	Organic acids and derivatives	Carboxylic acids and derivatives	Amino acids, peptides, and analogues
Trp-ser	C1=CC=C2C(=C1)C(=CN2)CC(C(=O)NC(CO)C(=O)O)N	MYVYPSWUSKCCHG-UHFFFAOYSA-N	Organic acids and derivatives	Carboxylic acids and derivatives	Amino acids, peptides, and analogues
Tyr-Ala	CC(C(=O)O)NC(=O)C(CC1=CC=C(C=C1)O)N	NLKUJNGEGZDXGO-UHFFFAOYSA-N	Organic acids and derivatives	Carboxylic acids and derivatives	Amino acids, peptides, and analogues
Tyr-His	C1=CC(=CC=C1CC(C(=O)NC(CC2=CN=CN2)C(=O)O)N)O	ZQOOYCZQENFIMC-UHFFFAOYSA-N	Organic acids and derivatives	Carboxylic acids and derivatives	Amino acids, peptides, and analogues
Tyr-Thr	CC(C(C(=O)O)NC(=O)C(CC1=CC=C(C=C1)O)N)O	MFEVVAXTBZELLL-UHFFFAOYSA-N	Organic acids and derivatives	Carboxylic acids and derivatives	Amino acids, peptides, and analogues
Tyr-Tyr	C1=CC(=CC=C1CC(C(=O)NC(CC2=CC=C(C=C2)O)C(=O)O)N)O	JAQGKXUEKGKTKX-UHFFFAOYSA-N	Organic acids and derivatives	Carboxylic acids and derivatives	Amino acids, peptides, and analogues
Tyr-phe	C1=CC=C(C=C1)CC(C(=O)O)NC(=O)C(CC2=CC=C(C=C2)O)N	CGWAPUBOXJWXMS-UHFFFAOYSA-N	Organic acids and derivatives	Carboxylic acids and derivatives	Amino acids, peptides, and analogues
Val-Ala-Ile	CCC(C)C(C(=O)O)NC(=O)C(C)NC(=O)C(C(C)C)N	LTFLDDDGWOVIHY-UHFFFAOYSA-N	Organic acids and derivatives	Carboxylic acids and derivatives	Amino acids, peptides, and analogues
Val-Asp-Ile	CCC(C)C(C(=O)O)NC(=O)C(CC(=O)O)NC(=O)C(C(C)C)N	XLDYBRXERHITNH-UHFFFAOYSA-N	Organic acids and derivatives	Carboxylic acids and derivatives	Amino acids, peptides, and analogues
Val-Glu-Leu	CC(C)CC(C(=O)O)NC(=O)C(CCC(=O)O)NC(=O)C(C(C)C)N	ROLGIBMFNMZANA-UHFFFAOYSA-N	Organic acids and derivatives	Carboxylic acids and derivatives	Amino acids, peptides, and analogues
Val-His	CC(C)C(C(=O)NC(CC1=CN=CN1)C(=O)O)N	BNQVUHQWZGTIBX-UHFFFAOYSA-N	Organic acids and derivatives	Carboxylic acids and derivatives	Amino acids, peptides, and analogues
Val-Ile-Asp	CCC(C)C(C(=O)NC(CC(=O)O)C(=O)O)NC(=O)C(C(C)C)N	LKUDRJSNRWVGMS-UHFFFAOYSA-N	Organic acids and derivatives	Carboxylic acids and derivatives	Amino acids, peptides, and analogues
Val-Ile-Gly	CCC(C)C(C(=O)NCC(=O)O)NC(=O)C(C(C)C)N	UKEVLVBHRKWECS-UHFFFAOYSA-N	Organic acids and derivatives	Carboxylic acids and derivatives	Amino acids, peptides, and analogues
Val-Ile-Val	CCC(C)C(C(=O)NC(C(C)C)C(=O)O)NC(=O)C(C(C)C)N	DJQIUOKSNRBTSV-UHFFFAOYSA-N	Organic acids and derivatives	Carboxylic acids and derivatives	Amino acids, peptides, and analogues
Val-Tyr	CC(C)C(C(=O)NC(CC1=CC=C(C=C1)O)C(=O)O)N	VEYJKJORLPYVLO-UHFFFAOYSA-N	Organic acids and derivatives	Carboxylic acids and derivatives	Amino acids, peptides, and analogues
Val-Val-Asp	CC(C)C(C(=O)NC(C(C)C)C(=O)NC(CC(=O)O)C(=O)O)N	ZLNYBMWGPOKSLW-UHFFFAOYSA-N	Organic acids and derivatives	Carboxylic acids and derivatives	Amino acids, peptides, and analogues
Val-Val-Leu	CC(C)CC(C(=O)O)NC(=O)C(C(C)C)NC(=O)C(C(C)C)N	MOJFVLVTLZDQGW-UHFFFAOYSA-N	Organic acids and derivatives	Carboxylic acids and derivatives	Amino acids, peptides, and analogues
7-O-Methylamentoflavone	COC1=CC(=C2C(=C1)OC(=CC2=O)C3=CC(=C(C=C3)O)C4=C(C=C(C5=C4OC(=CC5=O)C6=CC=C(C=C6)O)O)O)O	TYUMAYSMJLPFAN-UHFFFAOYSA-N	Phenylpropanoids and polyketides	Flavonoids	Biflavonoids and polyflavonoids
Carthamone	C1=CC(=CC=C1C=CC(=O)C2=C(C(=O)C(=O)C=C2O)OC3C(C(C(C(O3)CO)O)O)O)O	YQNGUUQYDSHYMO-UHFFFAOYSA-N	Phenylpropanoids and polyketides	Cinnamic acids and derivatives	Hydroxycinnamic acids and derivatives
Flavokawain%20C	COC1=CC(=C(C(=C1)OC)C(=O)C=CC2=CC=C(C=C2)O)O	UXUFMIJZNYXWDX-UHFFFAOYSA-N	Phenylpropanoids and polyketides	Linear 1,3-diarylpropanoids	Chalcones and dihydrochalcones
Marein	C1=CC(=C(C=C1C=CC(=O)C2=C(C(=C(C=C2)OC3C(C(C(C(O3)CO)O)O)O)O)O)O)O	XGEYXJDOVMEJNG-UHFFFAOYSA-N	Phenylpropanoids and polyketides	Flavonoids	Flavonoid glycosides
Neosakuranin	COC1=CC(=C(C(=C1)OC2C(C(C(C(O2)CO)O)O)O)C(=O)C=CC3=CC=C(C=C3)O)O	MNYVBVCMMNPLJI-UHFFFAOYSA-N	Phenylpropanoids and polyketides	Flavonoids	Flavonoid glycosides
Catechin	C1C(C(OC2=CC(=CC(=C21)O)O)C3=CC(=C(C=C3)O)O)O	PFTAWBLQPZVEMU-UHFFFAOYSA-N	Phenylpropanoids and polyketides	Flavonoids	Flavans
Catechin%204'-O-beta-D-glucopyranoside	C1C(C(OC2=CC(=CC(=C21)O)O)C3=CC(=C(C=C3)OC4C(C(C(C(O4)CO)O)O)O)O)O	LTDLFQZRSXJVAN-UHFFFAOYSA-N	Phenylpropanoids and polyketides	Flavonoids	Flavonoid glycosides
Catechin-5-O-glucoside	C1C(C(OC2=C1C(=CC(=C2)O)OC3C(C(C(C(O3)CO)O)O)O)C4=CC(=C(C=C4)O)O)O	ZESJTWVSXGZYTD-UHFFFAOYSA-N	Phenylpropanoids and polyketides	Flavonoids	Flavonoid glycosides
Cinchonain%20Ia	C1C(C(OC2=C1C(=CC3=C2C(CC(=O)O3)C4=CC(=C(C=C4)O)O)O)C5=CC(=C(C=C5)O)O)O	LKCOZWLUAKSRQM-UHFFFAOYSA-N	Phenylpropanoids and polyketides	Flavonoids	Flavans
Cinchonain%20Ib	C1C(C(OC2=C1C(=CC3=C2C(CC(=O)O3)C4=CC(=C(C=C4)O)O)O)C5=CC(=C(C=C5)O)O)O	LKCOZWLUAKSRQM-UHFFFAOYSA-N	Phenylpropanoids and polyketides	Flavonoids	Flavans
Cinchonain%20Ic	C1C(C(OC2=C1C3=C(C(CC(=O)O3)C4=CC(=C(C=C4)O)O)C(=C2)O)C5=CC(=C(C=C5)O)O)O	AKZBEMDOKOHIFM-UHFFFAOYSA-N	Phenylpropanoids and polyketides	Flavonoids	Flavans
Cinchonain%20Id	C1C(C(OC2=C1C3=C(C(CC(=O)O3)C4=CC(=C(C=C4)O)O)C(=C2)O)C5=CC(=C(C=C5)O)O)O	AKZBEMDOKOHIFM-UHFFFAOYSA-N	Phenylpropanoids and polyketides	Flavonoids	Flavans
Epicatechin%203-glucoside	C1C(C(OC2=CC(=CC(=C21)O)O)C3=CC(=C(C=C3)O)O)OC4C(C(C(C(O4)CO)O)O)O	YOVYWMDLYSJYPO-UHFFFAOYSA-N	Phenylpropanoids and polyketides	Flavonoids	Flavonoid glycosides
Epigallocatechin	C1C(C(OC2=CC(=CC(=C21)O)O)C3=CC(=C(C(=C3)O)O)O)O	XMOCLSLCDHWDHP-UHFFFAOYSA-N	Phenylpropanoids and polyketides	Flavonoids	Flavans
Eriodictyol-7-O-glucoside	C1C(OC2=CC(=CC(=C2C1=O)O)OC3C(C(C(C(O3)CO)O)O)O)C4=CC(=C(C=C4)O)O	RAFHNDRXYHOLSH-UHFFFAOYSA-N	Phenylpropanoids and polyketides	Flavonoids	Flavonoid glycosides
Hesperetin-5-O-glucoside	COC1=C(C=C(C=C1)C2CC(=O)C3=C(O2)C=C(C=C3OC4C(C(C(C(O4)CO)O)O)O)O)O	QSLBWGKNSBMTJL-UHFFFAOYSA-N	Phenylpropanoids and polyketides	Flavonoids	Flavonoid glycosides
Hesperetin-7-O-glucoside	COC1=C(C=C(C=C1)C2CC(=O)C3=C(C=C(C=C3O2)OC4C(C(C(C(O4)CO)O)O)O)O)O	ADSYMQORONDIDD-UHFFFAOYSA-N	Phenylpropanoids and polyketides	Flavonoids	Flavonoid glycosides
Homoeriodictyol%207-O-glucoside	COC1=C(C=CC(=C1)C2CC(=O)C3=C(C=C(C=C3O2)OC4C(C(C(C(O4)CO)O)O)O)O)O	KZQCCKUDYVSOLC-UHFFFAOYSA-N	Phenylpropanoids and polyketides	Flavonoids	Flavonoid glycosides
Methylhesperidin	CC1C(C(C(C(O1)OCC2C(C(C(C(O2)OC3=CC(=C4C(=O)CC(OC4=C3)C5=CC(=C(C=C5)OC)OC)O)O)O)O)O)O)O	GUMSHIGGVOJLBP-UHFFFAOYSA-N	Phenylpropanoids and polyketides	Flavonoids	Flavonoid glycosides
Persicoside	COC1=C(C=C(C=C1)C2CC(=O)C3=C(O2)C=C(C=C3OC4C(C(C(C(O4)CO)O)O)O)OC)O	NKYUUWHIEOUGKB-UHFFFAOYSA-N	Phenylpropanoids and polyketides	Flavonoids	Flavonoid glycosides
Sakuranin	COC1=CC2=C(C(=O)CC(O2)C3=CC=C(C=C3)O)C(=C1)OC4C(C(C(C(O4)CO)O)O)O	NEPMMBQHELYZIW-UHFFFAOYSA-N	Phenylpropanoids and polyketides	Flavonoids	Flavonoid glycosides
Garbanzol	C1=CC(=CC=C1C2C(C(=O)C3=C(O2)C=C(C=C3)O)O)O	VRTGGIJPIYOHGT-UHFFFAOYSA-N	Phenylpropanoids and polyketides	Flavonoids	Flavans
Phellavin	CC(C)(CCC1=C(C=C2C(=C1O)C(=O)C(C(O2)C3=CC=C(C=C3)O)O)OC4C(C(C(C(O4)CO)O)O)O)O	YXACCHLOUSCDDR-UHFFFAOYSA-N	Phenylpropanoids and polyketides	Flavonoids	Flavonoid glycosides
4'-O-Glucosylvitexin	C1=CC(=CC=C1C2=CC(=O)C3=C(O2)C(=C(C=C3O)O)C4C(C(C(C(O4)CO)O)O)O)OC5C(C(C(C(O5)CO)O)O)O	CQJPSSJEHVNDFL-UHFFFAOYSA-N	Phenylpropanoids and polyketides	Flavonoids	Flavonoid glycosides
Acacetin	COC1=CC=C(C=C1)C2=CC(=O)C3=C(C=C(C=C3O2)O)O	DANYIYRPLHHOCZ-UHFFFAOYSA-N	Phenylpropanoids and polyketides	Flavonoids	O-methylated flavonoids
Apigenin-4'-O-glucoside	C1=CC(=CC=C1C2=CC(=O)C3=C(C=C(C=C3O2)O)O)OC4C(C(C(C(O4)CO)O)O)O	ICLVCWSZHUZEFT-UHFFFAOYSA-N	Phenylpropanoids and polyketides	Flavonoids	Flavonoid glycosides
Chrysin	C1=CC=C(C=C1)C2=CC(=O)C3=C(C=C(C=C3O2)O)O	RTIXKCRFFJGDFG-UHFFFAOYSA-N	Phenylpropanoids and polyketides	Flavonoids	Flavones
Hydroxygenkwanin	COC1=CC(=C2C(=C1)OC(=CC2=O)C3=CC(=C(C=C3)O)O)O	RRRSSAVLTCVNIQ-UHFFFAOYSA-N	Phenylpropanoids and polyketides	Flavonoids	O-methylated flavonoids
Isoschaftoside	C1C(C(C(C(O1)C2=C(C(=C3C(=C2O)C(=O)C=C(O3)C4=CC=C(C=C4)O)C5C(C(C(C(O5)CO)O)O)O)O)O)O)O	OVMFOVNOXASTPA-UHFFFAOYSA-N	Phenylpropanoids and polyketides	Flavonoids	Flavonoid glycosides
Luteolin-4'-O-glucoside	C1=CC(=C(C=C1C2=CC(=O)C3=C(C=C(C=C3O2)O)O)O)OC4C(C(C(C(O4)CO)O)O)O	UHNXUSWGOJMEFO-UHFFFAOYSA-N	Phenylpropanoids and polyketides	Flavonoids	Flavonoid glycosides
Tectochrysin	COC1=CC(=C2C(=C1)OC(=CC2=O)C3=CC=CC=C3)O	IRZVHDLBAYNPCT-UHFFFAOYSA-N	Phenylpropanoids and polyketides	Flavonoids	O-methylated flavonoids
Tricin-7-O-Glucoside	COC1=CC(=CC(=C1O)OC)C2=CC(=O)C3=C(C=C(C=C3O2)OC4C(C(C(C(O4)CO)O)O)O)O	JGXFMIJHKASCIZ-UHFFFAOYSA-N	Phenylpropanoids and polyketides	Flavonoids	Flavonoid glycosides
Vitexin-7-O-rutinoside	CC1C(C(C(C(O1)OCC2C(C(C(C(O2)OC3=C(C4=C(C(=C3)O)C(=O)C=C(O4)C5=CC=C(C=C5)O)C6C(C(C(C(O6)CO)O)O)O)O)O)O)O)O)O	HGBXMQQIDYBMQP-UHFFFAOYSA-N	Phenylpropanoids and polyketides	Flavonoids	Flavonoid glycosides
6-C-MethylKaempferol-3-glucoside	CC1=C(C2=C(C=C1O)OC(=C(C2=O)OC3C(C(C(C(O3)CO)O)O)O)C4=CC=C(C=C4)O)O	CBSZNHSSZDGQIX-UHFFFAOYSA-N	Phenylpropanoids and polyketides	Flavonoids	Flavonoid glycosides
Centaurein	COC1=C(C=C(C=C1)C2=C(C(=O)C3=C(C(=C(C=C3O2)OC4C(C(C(C(O4)CO)O)O)O)OC)O)OC)O	GGMCFLXPZMBJMV-UHFFFAOYSA-N	Phenylpropanoids and polyketides	Flavonoids	Flavonoid glycosides
Fisetin	C1=CC(=C(C=C1C2=C(C(=O)C3=C(O2)C=C(C=C3)O)O)O)O	XHEFDIBZLJXQHF-UHFFFAOYSA-N	Phenylpropanoids and polyketides	Flavonoids	Flavones
Kaempferol-3-O-arabinoside	C1C(C(C(C(O1)OC2=C(OC3=CC(=CC(=C3C2=O)O)O)C4=CC=C(C=C4)O)O)O)O	RNVUDWOQYYWXBJ-UHFFFAOYSA-N	Phenylpropanoids and polyketides	Flavonoids	Flavonoid glycosides
Kaempferol-3-O-sophoroside	C1=CC(=CC=C1C2=C(C(=O)C3=C(C=C(C=C3O2)O)O)OC4C(C(C(C(O4)CO)O)O)OC5C(C(C(C(O5)CO)O)O)O)O	LKZDFKLGDGSGEO-UHFFFAOYSA-N	Phenylpropanoids and polyketides	Flavonoids	Flavonoid glycosides
Kaempferol-7-O-glucoside	C1=CC(=CC=C1C2=C(C(=O)C3=C(C=C(C=C3O2)OC4C(C(C(C(O4)CO)O)O)O)O)[O-])O	YPWHZCPMOQGCDQ-UHFFFAOYSA-M	Phenylpropanoids and polyketides	Flavonoids	Flavonoid glycosides
Kaempferol-7-O-rhamnoside	CC1C(C(C(C(O1)OC2=CC(=C3C(=C2)OC(=C(C3=O)O)C4=CC=C(C=C4)O)O)O)O)O	HQNOUCSPWAGQND-UHFFFAOYSA-N	Phenylpropanoids and polyketides	Flavonoids	Flavonoid glycosides
Limocitrol%203-Glucoside	COC1=C(C=CC(=C1)C2=C(C(=O)C3=C(C(=C(C(=C3O2)OC)O)OC)O)OC4C(C(C(C(O4)CO)O)O)O)O	PRBUAZIWXABBBW-UHFFFAOYSA-N	Phenylpropanoids and polyketides	Flavonoids	Flavonoid glycosides
Morin	C1=CC(=C(C=C1O)O)C2=C(C(=O)C3=C(C=C(C=C3O2)O)O)O	YXOLAZRVSSWPPT-UHFFFAOYSA-N	Phenylpropanoids and polyketides	Flavonoids	Flavones
Quercetin-3-O-robinobioside	CC1C(C(C(C(O1)OCC2C(C(C(C(O2)OC3=C(OC4=CC(=CC(=C4C3=O)O)O)C5=CC(=C(C=C5)O)O)O)O)O)O)O)O	IKGXIBQEEMLURG-UHFFFAOYSA-N	Phenylpropanoids and polyketides	Flavonoids	Flavonoid glycosides
Quercetin-7-O-glucoside	C1=CC(=C(C=C1C2=C(C(=O)C3=C(C=C(C=C3O2)OC4C(C(C(C(O4)CO)O)O)O)O)O)O)O	BBFYUPYFXSSMNV-UHFFFAOYSA-N	Phenylpropanoids and polyketides	Flavonoids	Flavonoid glycosides
Rhamnetin-3-O-rhamnoside	CC1C(C(C(C(O1)OC2=C(OC3=CC(=CC(=C3C2=O)O)OC)C4=CC(=C(C=C4)O)O)O)O)O	LOMXQCXSNSCLNP-UHFFFAOYSA-N	Phenylpropanoids and polyketides	Flavonoids	Flavonoid glycosides
Tectorigenin	COC1=C(C2=C(C=C1O)OC=C(C2=O)C3=CC=C(C=C3)O)O	OBBCRPUNCUPUOS-UHFFFAOYSA-N	Phenylpropanoids and polyketides	Isoflavonoids	Isoflav-2-enes
3'-Hydroxy-4'-O-methylglabridin	CC1(C=CC2=C(O1)C=CC3=C2OCC(C3)C4=C(C(=C(C=C4)OC)O)O)C	PPBISUGOQDBBEL-UHFFFAOYSA-N	Phenylpropanoids and polyketides	Isoflavonoids	Pyranoisoflavonoids
Isomangiferin	C1=C2C(=CC(=C1O)O)OC3=C(C2=O)C(=CC(=C3C4C(C(C(C(O4)CO)O)O)O)O)O	CDYBOKJASDEORM-UHFFFAOYSA-N	Organoheterocyclic compounds	Benzopyrans	1-benzopyrans
Mangiferin	C1=C2C(=CC(=C1O)O)OC3=C(C2=O)C(=C(C(=C3)O)C4C(C(C(C(O4)CO)O)O)O)O	AEDDIBAIWPIIBD-UHFFFAOYSA-N	Organoheterocyclic compounds	Benzopyrans	1-benzopyrans
Sibiricaxanthone%20A	C1C(C(C(O1)OCC2C(C(C(C(O2)C3=C(C4=C(C=C3O)OC5=C(C4=O)C=C(C=C5)O)O)O)O)O)O)(CO)O	RQGJKXKUUWCQNK-UHFFFAOYSA-N	Organoheterocyclic compounds	Benzopyrans	1-benzopyrans
Tetrahydroswertianolin	COC1=CC(=C2C(=C1)OC3=C(C2=O)C(CCC3O)OC4C(C(C(C(O4)CO)O)O)O)O	FOVMRYXSQHNGSU-UHFFFAOYSA-N	Organoheterocyclic compounds	Benzopyrans	1-benzopyrans
Cichoriin	C1=CC(=O)OC2=CC(=C(C=C21)O)OC3C(C(C(C(O3)CO)O)O)O	WNBCMONIPIJTSB-UHFFFAOYSA-N	Phenylpropanoids and polyketides	Coumarins and derivatives	Coumarin glycosides
Coumestrol	C1=CC2=C(C=C1O)OC3=C2C(=O)OC4=C3C=CC(=C4)O	ZZIALNLLNHEQPJ-UHFFFAOYSA-N	Phenylpropanoids and polyketides	Isoflavonoids	Coumestans
Coumurrayin	CC(=CCC1=C(C=C(C2=C1OC(=O)C=C2)OC)OC)C	CPXPWRXPEOMRNV-UHFFFAOYSA-N	Phenylpropanoids and polyketides	Coumarins and derivatives	Unassigned
Daphnetin	C1=CC(=C(C2=C1C=CC(=O)O2)O)O	ATEFPOUAMCWAQS-UHFFFAOYSA-N	Phenylpropanoids and polyketides	Coumarins and derivatives	Hydroxycoumarins
Daphnin	C1=CC(=C(C2=C1C=CC(=O)O2)O)OC3C(C(C(C(O3)CO)O)O)O	HOIXTKAYCMNVMY-UHFFFAOYSA-N	Phenylpropanoids and polyketides	Coumarins and derivatives	Coumarin glycosides
Decursin	CC(=CC(=O)OC1CC2=C(C=C3C(=C2)C=CC(=O)O3)OC1(C)C)C	CUKSFECWKQBVED-UHFFFAOYSA-N	Phenylpropanoids and polyketides	Coumarins and derivatives	Pyranocoumarins
Decursinol%20angelate	CC=C(C)C(=O)OC1CC2=C(C=C3C(=C2)C=CC(=O)O3)OC1(C)C	AGABNGOXUSXQDD-UHFFFAOYSA-N	Phenylpropanoids and polyketides	Coumarins and derivatives	Pyranocoumarins
Demethylsuberosin	CC(=CCC1=C(C=C2C(=C1)C=CC(=O)O2)O)C	FIDUIAPDSKSUGO-UHFFFAOYSA-N	Phenylpropanoids and polyketides	Coumarins and derivatives	Hydroxycoumarins
Fraxetin%20(7,8-Dihydroxy-6-methoxycoumarin)	COC1=C(C(=C2C(=C1)C=CC(=O)O2)O)O	HAVWRBANWNTOJX-UHFFFAOYSA-N	Phenylpropanoids and polyketides	Coumarins and derivatives	Hydroxycoumarins
Heraclenol	CC(C)(C(COC1=C2C(=CC3=C1OC=C3)C=CC(=O)O2)O)O	FOINLJRVEBYARJ-UHFFFAOYSA-N	Phenylpropanoids and polyketides	Coumarins and derivatives	Furanocoumarins
Nodakenin	CC(C)(C1CC2=C(O1)C=C3C(=C2)C=CC(=O)O3)OC4C(C(C(C(O4)CO)O)O)O	HXCGUCZXPFBNRD-UHFFFAOYSA-N	Phenylpropanoids and polyketides	Coumarins and derivatives	Furanocoumarins
Peucedanol%207-O-glucoside	CC(C)(C(CC1=C(C=C2C(=C1)C=CC(=O)O2)OC3C(C(C(C(O3)CO)O)O)O)O)O	DMCVVAVPFHUPNH-UHFFFAOYSA-N	Phenylpropanoids and polyketides	Coumarins and derivatives	Coumarin glycosides
Phellodenol%20H	C1=CC(=O)OC2=CC(=C(C=C21)CCOC3C(C(C(C(O3)CO)O)O)O)O	VEHQNUUANSLPNH-UHFFFAOYSA-N	Phenylpropanoids and polyketides	Coumarins and derivatives	Hydroxycoumarins
Phenprocoumon	CCC(C1=CC=CC=C1)C2=C(C3=CC=CC=C3OC2=O)O	DQDAYGNAKTZFIW-UHFFFAOYSA-N	Phenylpropanoids and polyketides	Coumarins and derivatives	Hydroxycoumarins
Scoparone	COC1=C(C=C2C(=C1)C=CC(=O)O2)OC	GUAFOGOEJLSQBT-UHFFFAOYSA-N	Phenylpropanoids and polyketides	Coumarins and derivatives	Unassigned
isofraxidin	COC1=C(C(=C2C(=C1)C=CC(=O)O2)OC)O	HOEVRHHMDJKUMZ-UHFFFAOYSA-N	Phenylpropanoids and polyketides	Coumarins and derivatives	Hydroxycoumarins
1-Hydroxypinoresinol-1-O-Glucoside	COC1=C(C=CC(=C1)C2C3COC(C3(CO2)OC4C(C(C(C(O4)CO)O)O)O)C5=CC(=C(C=C5)O)OC)O	DRAPQDCEBKBPQE-UHFFFAOYSA-N	Lignans, neolignans and related compounds	Lignan glycosides	Unassigned
Arctiin	COC1=C(C=C(C=C1)CC2COC(=O)C2CC3=CC(=C(C=C3)OC4C(C(C(C(O4)CO)O)O)O)OC)OC	XOJVHLIYNSOZOO-UHFFFAOYSA-N	Lignans, neolignans and related compounds	Lignan glycosides	Unassigned
Epipinoresinol	COC1=C(C=CC(=C1)C2C3COC(C3CO2)C4=CC(=C(C=C4)O)OC)O	HGXBRUKMWQGOIE-UHFFFAOYSA-N	Lignans, neolignans and related compounds	Furanoid lignans	Unassigned
Eucommin%20A	COC1=CC(=CC(=C1OC2C(C(C(C(O2)CO)O)O)O)OC)C3C4COC(C4CO3)C5=CC(=C(C=C5)O)OC	GLGVEKKQPFRBAS-UHFFFAOYSA-N	Lignans, neolignans and related compounds	Lignan glycosides	Unassigned
Icariside%20E4	CC1C(C(C(C(O1)OC2=C(C=C(C=C2)C3C(C4=C(O3)C(=CC(=C4)CCCO)OC)CO)OC)O)O)O	FYWCDZKQBWSMDD-UHFFFAOYSA-N	Phenylpropanoids and polyketides	2-arylbenzofuran flavonoids	Unassigned
Isolariciresinol-9'-O-glucoside	COC1=C(C=C2C(C(C(CC2=C1)CO)COC3C(C(C(C(O3)CO)O)O)O)C4=CC(=C(C=C4)O)OC)O	AHYOMNWKYGMYMB-UHFFFAOYSA-N	Lignans, neolignans and related compounds	Lignan glycosides	Unassigned
Matairesinol	COC1=C(C=CC(=C1)CC2COC(=O)C2CC3=CC(=C(C=C3)O)OC)O	MATGKVZWFZHCLI-UHFFFAOYSA-N	Lignans, neolignans and related compounds	Furanoid lignans	Tetrahydrofuran lignans
Nectandrin%20B	CC1C(C(OC1C2=CC(=C(C=C2)O)OC)C3=CC(=C(C=C3)O)OC)C	GMXMKSFJQLFOSO-UHFFFAOYSA-N	Lignans, neolignans and related compounds	Furanoid lignans	Tetrahydrofuran lignans
Pinoresinol	COC1=C(C=CC(=C1)C2C3COC(C3CO2)C4=CC(=C(C=C4)O)OC)O	HGXBRUKMWQGOIE-UHFFFAOYSA-N	Lignans, neolignans and related compounds	Furanoid lignans	Unassigned
Sesamin	C1C2C(COC2C3=CC4=C(C=C3)OCO4)C(O1)C5=CC6=C(C=C5)OCO6	PEYUIKBAABKQKQ-UHFFFAOYSA-N	Lignans, neolignans and related compounds	Furanoid lignans	Unassigned
Trachelogenin	COC1=C(C=C(C=C1)CC2COC(=O)C2(CC3=CC(=C(C=C3)O)OC)O)OC	YFVZKLQNMNKWSB-UHFFFAOYSA-N	Lignans, neolignans and related compounds	Furanoid lignans	Tetrahydrofuran lignans
Verrucosin	CC1C(C(OC1C2=CC(=C(C=C2)O)OC)C3=CC(=C(C=C3)O)OC)C	GMXMKSFJQLFOSO-UHFFFAOYSA-N	Lignans, neolignans and related compounds	Furanoid lignans	Tetrahydrofuran lignans
Vitexdoin%20C	COC1=C(C=CC(=C1)C2=C(C=CC3=CC(=C(C=C32)O)OC)C=O)O	TWPBLWBNALQAFO-UHFFFAOYSA-N	Benzenoids	Naphthalenes	Naphthols and derivatives
(7Z)-Hexadecenoic%20acid	CCCCCCCCC=CCCCCCC(=O)O	PJHOFUXBXJNUAC-UHFFFAOYSA-N	Lipids and lipid-like molecules	Fatty Acyls	Fatty acids and conjugates
(9S)-Hydroxyoctadecadienoic%20acid	CCCCCC=CC=CC(CCCCCCCC(=O)O)O	NPDSHTNEKLQQIJ-UHFFFAOYSA-N	Lipids and lipid-like molecules	Fatty Acyls	Lineolic acids and derivatives
(9Z,11E)-Octadecadienoic%20acid	CCCCCCC=CC=CCCCCCCCC(=O)O	JBYXPOFIGCOSSB-UHFFFAOYSA-N	Lipids and lipid-like molecules	Fatty Acyls	Lineolic acids and derivatives
12(13)Ep-9-KODE	CCCCCC1C(O1)C=CC(=O)CCCCCCCC(=O)O	RCMABBHQYMBYKV-UHFFFAOYSA-N	Lipids and lipid-like molecules	Fatty Acyls	Fatty acids and conjugates
12-Oxo-phytodienoic%20acid	CCC=CCC1C(C=CC1=O)CCCCCCCC(=O)O	PMTMAFAPLCGXGK-UHFFFAOYSA-N	Lipids and lipid-like molecules	Fatty Acyls	Eicosanoids
13-Hydroperoxy-9Z,11E-octadecadienoic%20acid	CCCCCC(C=CC=CCCCCCCCC(=O)O)OO	JDSRHVWSAMTSSN-UHFFFAOYSA-N	Lipids and lipid-like molecules	Fatty Acyls	Lineolic acids and derivatives
13-Hydroxy-9Z,11E-octadecadienoic%20acid	CCCCCC(C=CC=CCCCCCCCC(=O)O)O	HNICUWMFWZBIFP-UHFFFAOYSA-N	Lipids and lipid-like molecules	Fatty Acyls	Lineolic acids and derivatives
13S-Hydroperoxy-6Z,9Z,11E-octadecatrienoic%20acid	CCCCCC(C=CC=CCC=CCCCCC(=O)O)OO	LYFGXCQTRBQQMX-UHFFFAOYSA-N	Lipids and lipid-like molecules	Fatty Acyls	Lineolic acids and derivatives
13S-Hydroperoxy-9Z,11E-octadecadienoic%20acid	CCCCCC(C=CC=CCCCCCCCC(=O)O)OO	JDSRHVWSAMTSSN-UHFFFAOYSA-N	Lipids and lipid-like molecules	Fatty Acyls	Lineolic acids and derivatives
13S-Hydroxy-9Z,11E,15Z-octadecatrienoic%20acid	CCC=CCC(C=CC=CCCCCCCCC(=O)O)O	KLLGGGQNRTVBSU-UHFFFAOYSA-N	Lipids and lipid-like molecules	Fatty Acyls	Lineolic acids and derivatives
14,15-Dehydrocrepenynic%20acid	CCCC=CC#CCC=CCCCCCCCC(=O)O	HJYQCZVMQAYTMN-UHFFFAOYSA-N	Lipids and lipid-like molecules	Fatty Acyls	Fatty acids and conjugates
14,15-DiHETrE	CCCCCC(C(CC=CCC=CCC=CCCCC(=O)O)O)O	SYAWGTIVOGUZMM-UHFFFAOYSA-N	Lipids and lipid-like molecules	Fatty Acyls	Eicosanoids
15-HEPE	CCC=CCC(C=CC=CCC=CCC=CCCCC(=O)O)O	WLKCSMCLEKGITB-UHFFFAOYSA-N	Lipids and lipid-like molecules	Fatty Acyls	Eicosanoids
15-Oxo-5Z,8Z,11Z,13E-eicosatetraenoic%20acid	CCCCCC(=O)C=CC=CCC=CCC=CCCCC(=O)O	YGJTUEISKATQSM-UHFFFAOYSA-N	Lipids and lipid-like molecules	Fatty Acyls	Fatty acids and conjugates
17-Hydroxylinolenic%20acid	CC(C=CCC=CCC=CCCCCCCCC(=O)O)O	PSQSSLVXOIJSMX-UHFFFAOYSA-N	Lipids and lipid-like molecules	Fatty Acyls	Lineolic acids and derivatives
2R-hydroxy-9Z,12Z,15Z-octadecatrienoic%20acid	CCC=CCC=CCC=CCCCCCCC(C(=O)O)O	JQXGCBKGIBTCHY-UHFFFAOYSA-N	Lipids and lipid-like molecules	Fatty Acyls	Lineolic acids and derivatives
5,6-EET%20Methyl%20Ester	CCCCCC=CCC=CCC=CCC1C(O1)CCCC(=O)OC	XGESKIWNDBIILZ-UHFFFAOYSA-N	Lipids and lipid-like molecules	Fatty Acyls	Fatty acid esters
9-Hydroperoxy-10E,12,15Z-octadecatrienoic%20acid	CCC=CCC=CC=CC(CCCCCCCC(=O)O)OO	RWKJTIHNYSIIHW-UHFFFAOYSA-N	Lipids and lipid-like molecules	Fatty Acyls	Lineolic acids and derivatives
9-Hydroxy-12-oxo-10(E),15(Z)-octadecadienoic%20acid	CCC=CCCC(=O)C=CC(CCCCCCCC(=O)O)O	AAJBIBPYWAVKOQ-UHFFFAOYSA-N	Lipids and lipid-like molecules	Fatty Acyls	Lineolic acids and derivatives
9-Hydroxy-12-oxo-15(Z)-octadecenoic%20acid	CCC=CCCC(=O)CCC(CCCCCCCC(=O)O)O	XWGDYOAIOAADAR-UHFFFAOYSA-N	Lipids and lipid-like molecules	Fatty Acyls	Lineolic acids and derivatives
9-Oxo-10E,12Z-octadecadienoic%20acid	CCCCCC=CC=CC(=O)CCCCCCCC(=O)O	LUZSWWYKKLTDHU-UHFFFAOYSA-N	Lipids and lipid-like molecules	Fatty Acyls	Lineolic acids and derivatives
9-Oxo-12Z-Octadecenoic%20acid	CCCCCC=CCCC(=O)CCCCCCCC(=O)O	BKJBXNYJVJPQLE-UHFFFAOYSA-N	Lipids and lipid-like molecules	Fatty Acyls	Lineolic acids and derivatives
9R-hydroxy-10E,12Z-octadecadienoic%20acid	CCCCCC=CC=CC(CCCCCCCC(=O)O)O	NPDSHTNEKLQQIJ-UHFFFAOYSA-N	Lipids and lipid-like molecules	Fatty Acyls	Lineolic acids and derivatives
9S-Hydroperoxy-10E,12Z-octadecadienoic%20acid	CCCCCC=CC=CC(CCCCCCCC(=O)O)OO	JGUNZIWGNMQSBM-UHFFFAOYSA-N	Lipids and lipid-like molecules	Fatty Acyls	Lineolic acids and derivatives
9S-Hydroxy-10E,12Z-octadecadienoic%20acid	CCCCCC=CC=CC(CCCCCCCC(=O)O)O	NPDSHTNEKLQQIJ-UHFFFAOYSA-N	Lipids and lipid-like molecules	Fatty Acyls	Lineolic acids and derivatives
Coixenolide	CCCCCCC=CCCCCCCCCCC(=O)OC(C)C(C)OC(=O)CCCCCCCC=CCCCCCC	DPQCZNIGGNJGTD-UHFFFAOYSA-N	Lipids and lipid-like molecules	Fatty Acyls	Fatty acid esters
Crepenynic%20acid	CCCCCC#CCC=CCCCCCCCC(=O)O	SAOSKFBYQJLQOS-UHFFFAOYSA-N	Lipids and lipid-like molecules	Fatty Acyls	Fatty acids and conjugates
E,E,Z-1,3,12-Nonadecatriene-5,14-diol	CCCCCC(C=CCCCCCCC(C=CC=C)O)O	AWDHIFBTFZYCRJ-UHFFFAOYSA-N	Lipids and lipid-like molecules	Fatty Acyls	Fatty alcohols
Keto-Deoxy-Nonulonic%20acid	C1C(C(C(OC1(C(=O)O)O)C(C(CO)O)O)O)O	CLRLHXKNIYJWAW-UHFFFAOYSA-N	Organic oxygen compounds	Organooxygen compounds	Carbohydrates and carbohydrate conjugates
Methyl%20linolenate	CCC=CCC=CCC=CCCCCCCCC(=O)OC	DVWSXZIHSUZZKJ-UHFFFAOYSA-N	Lipids and lipid-like molecules	Fatty Acyls	Lineolic acids and derivatives
Moroctic%20Acid%20methyl%20ester	CCC=CCC=CCC=CCC=CCCCCC(=O)OC	BIRKCHKCDPCDEG-UHFFFAOYSA-N	Lipids and lipid-like molecules	Fatty Acyls	Lineolic acids and derivatives
Palmitoylethanolamide	CCCCCCCCCCCCCCCC(=O)NCCO	HXYVTAGFYLMHSO-UHFFFAOYSA-N	Organic acids and derivatives	Carboximidic acids and derivatives	Carboximidic acids
1-Linolenoylglycerol	CCC=CCC=CCC=CCCCCCCCC(=O)OCC(CO)O	GGJRAQULURVTAJ-UHFFFAOYSA-N	Lipids and lipid-like molecules	Fatty Acyls	Lineolic acids and derivatives
1-Monomyristin	CCCCCCCCCCCCCC(=O)OCC(CO)O	DCBSHORRWZKAKO-UHFFFAOYSA-N	Lipids and lipid-like molecules	Glycerolipids	Monoradylglycerols
2-g-linolenoyl-glycerol	CCCCCC=CCC=CCC=CCCCCC(=O)OC(CO)CO	BXAXVVVVPFELOK-UHFFFAOYSA-N	Lipids and lipid-like molecules	Fatty Acyls	Lineolic acids and derivatives
Monolinolenin	CCC=CCC=CCC=CCCCCCCCC(=O)OCC(CO)O	GGJRAQULURVTAJ-UHFFFAOYSA-N	Lipids and lipid-like molecules	Fatty Acyls	Lineolic acids and derivatives
LysoPC%2014:0	CCCCCCCCCCCCCC(=O)OCC(COP(=O)([O-])OCC[N+](C)(C)C)O	VXUOFDJKYGDUJI-UHFFFAOYSA-N	Lipids and lipid-like molecules	Glycerophospholipids	Glycerophosphocholines
LysoPC%2015:1	CCCCCC=CCCCCCCCC(=O)OCC(COP(=O)([O-])OCC[N+](C)(C)C)O	SUCJIOBGMPMVBJ-UHFFFAOYSA-N	Lipids and lipid-like molecules	Glycerophospholipids	Glycerophosphocholines
LysoPC%2016:2	CCCCCCCCC=CCC=CCCC(=O)OCC(COP(=O)([O-])OCC[N+](C)(C)C)O	CZTCGVSNFACFNQ-UHFFFAOYSA-N	Lipids and lipid-like molecules	Glycerophospholipids	Glycerophosphocholines
LysoPC%2017:1	CCCCCCCC=CCCCCCCCC(=O)OCC(COP(=O)([O-])OCC[N+](C)(C)C)O	LPMGFNAQZPADDZ-UHFFFAOYSA-N	Lipids and lipid-like molecules	Glycerophospholipids	Glycerophosphocholines
LysoPC%2017:2	CCCCC=CCC=CCCCCCCCC(=O)OCC(COP(=O)([O-])OCC[N+](C)(C)C)O	GYPQKMKDLBCBMB-UHFFFAOYSA-N	Lipids and lipid-like molecules	Glycerophospholipids	Glycerophosphocholines
LysoPC%2019:0	CCCCCCCCCCCCCCCCCCC(=O)OCC(COP(=O)([O-])OCC[N+](C)(C)C)O	WYIMORDZGCUBAA-UHFFFAOYSA-N	Lipids and lipid-like molecules	Glycerophospholipids	Glycerophosphocholines
LysoPC%2022:6	CCC=CCC=CCC=CCC=CCC=CCC=CCCC(=O)OCC(COP(=O)([O-])OCC[N+](C)(C)C)O	LSOWKZULVQWMLY-UHFFFAOYSA-N	Lipids and lipid-like molecules	Glycerophospholipids	Glycerophosphocholines
LysoPE%2015:0	CCCCCCCCCCCCCCC(=O)OCC(COP(=O)(O)OCCN)O	FGHPDPYCRTXYNZ-UHFFFAOYSA-N	Lipids and lipid-like molecules	Glycerophospholipids	Glycerophosphoethanolamines
LysoPE%2015:1	CCCCCC=CCCCCCCCC(=O)OCC(COP(=O)(O)OCCN)O	MTAKQPCXFDXVHS-UHFFFAOYSA-N	Lipids and lipid-like molecules	Glycerophospholipids	Glycerophosphoethanolamines
LysoPE%2017:1	CCCCCCCC=CCCCCCCCC(=O)OCC(COP(=O)(O)OCCN)O	LNJNONCNASQZOB-UHFFFAOYSA-N	Lipids and lipid-like molecules	Glycerophospholipids	Glycerophosphoethanolamines
2-(Dimethylamino)guanosine	CN(C)C1=NC2=C(C(=O)N1)N=CN2C3C(C(C(O3)CO)O)O	RSPURTUNRHNVGF-UHFFFAOYSA-N	Nucleosides, nucleotides, and analogues	Purine nucleosides	Unassigned
5-Aminoimidazole%20ribonucleotide	C1=C(N(C=N1)C2C(C(C(O2)COP(=O)(O)O)O)O)N	PDACUKOKVHBVHJ-UHFFFAOYSA-N	Organic oxygen compounds	Organooxygen compounds	Carbohydrates and carbohydrate conjugates
6-O-methylguanine	COC1=NC(=NC2=C1NC=N2)N	BXJHWYVXLGLDMZ-UHFFFAOYSA-N	Organoheterocyclic compounds	Imidazopyrimidines	Purines and purine derivatives
Allopurinol	C1=NNC2=C1C(=O)NC=N2	OFCNXPDARWKPPY-UHFFFAOYSA-N	Organoheterocyclic compounds	Pyrazolopyrimidines	Pyrazolo[3,4-d]pyrimidines
Citicoline	C[N+](C)(C)CCOP(=O)([O-])OP(=O)(O)OCC1C(C(C(O1)N2C=CC(=NC2=O)N)O)O	RZZPDXZPRHQOCG-UHFFFAOYSA-N	Nucleosides, nucleotides, and analogues	Pyrimidine nucleotides	Pyrimidine ribonucleotides
Cyclic%203',5'-Adenylic%20acid	C1C2C(C(C(O2)N3C=NC4=C(N=CN=C43)N)O)OP(=O)(O1)O	IVOMOUWHDPKRLL-UHFFFAOYSA-N	Nucleosides, nucleotides, and analogues	Purine nucleotides	Cyclic purine nucleotides
Cytarabine	C1=CN(C(=O)N=C1N)C2C(C(C(O2)CO)O)O	UHDGCWIWMRVCDJ-UHFFFAOYSA-N	Nucleosides, nucleotides, and analogues	Pyrimidine nucleosides	Unassigned
Guanosine%203',5'-cyclic%20monophosphate	C1C2C(C(C(O2)N3C=NC4=C3N=C(NC4=O)N)O)OP(=O)(O1)O	ZOOGRGPOEVQQDX-UHFFFAOYSA-N	Nucleosides, nucleotides, and analogues	Purine nucleotides	Cyclic purine nucleotides
Isopentenyladenine9-Glucoside	CC(=CCNC1=C2C(=NC=N1)N(C=N2)C3C(C(C(C(O3)CO)O)O)O)C	XEHLLUQVSRLWMH-UHFFFAOYSA-N	Organic oxygen compounds	Organooxygen compounds	Carbohydrates and carbohydrate conjugates
Isoxanthopterin	C1=NC2=C(NC1=O)N=C(NC2=O)N	GLKCOBIIZKYKFN-UHFFFAOYSA-N	Organoheterocyclic compounds	Pteridines and derivatives	Pterins and derivatives
L-Sepiapterin	CC(C(=O)C1=NC2=C(NC1)N=C(NC2=O)N)O	VPVOXUSPXFPWBN-UHFFFAOYSA-N	Organoheterocyclic compounds	Pteridines and derivatives	Pterins and derivatives
Lumazine	C1=CN=C2C(=N1)C(=O)NC(=O)N2	UYEUUXMDVNYCAM-UHFFFAOYSA-N	Organoheterocyclic compounds	Pteridines and derivatives	Unassigned
N(6)-OH-Me-Adenosine	C1=NC(=C2C(=N1)N(C=N2)C3C(C(C(O3)CO)O)O)NCO	ZDSMLAYSJRQEGM-UHFFFAOYSA-N	Nucleosides, nucleotides, and analogues	Purine nucleosides	Unassigned
Nicotinic%20acid%20adenine%20dinucleotide	C1=CC(=C[N+](=C1)C2C(C(C(O2)COP(=O)(O)OP(=O)(O)OCC3C(C(C(O3)N4C=NC5=C(N=CN=C54)N)O)O)O)O)C(=O)O	SENPVEZBRZQVST-UHFFFAOYSA-O	Nucleosides, nucleotides, and analogues	(5'->5')-dinucleotides	Unassigned
Riboflavin%205'-Adenosine%20Diphosphate	CC1=CC2=C(C=C1C)N(C3=NC(=O)NC(=O)C3=N2)CC(C(C(COP(=O)(O)OP(=O)(O)OCC4C(C(C(O4)N5C=NC6=C(N=CN=C65)N)O)O)O)O)O	VWWQXMAJTJZDQX-UHFFFAOYSA-N	Nucleosides, nucleotides, and analogues	Flavin nucleotides	Unassigned
Riboprine	CC(=CCNC1=C2C(=NC=N1)N(C=N2)C3C(C(C(O3)CO)O)O)C	USVMJSALORZVDV-UHFFFAOYSA-N	Nucleosides, nucleotides, and analogues	Purine nucleosides	Unassigned
Succinyladenosine	C1=NC(=C2C(=N1)N(C=N2)C3C(C(C(O3)CO)O)O)NC(CC(=O)O)C(=O)O	VKGZCEJTCKHMRL-UHFFFAOYSA-N	Nucleosides, nucleotides, and analogues	Purine nucleosides	Unassigned
Vidarabine	C1=NC(=C2C(=N1)N(C=N2)C3C(C(C(O3)CO)O)O)N	OIRDTQYFTABQOQ-UHFFFAOYSA-N	Nucleosides, nucleotides, and analogues	Purine nucleosides	Unassigned
12-Hydroxyjasmonic%20Acid%20Glucoside	C1CC(=O)C(C1CC(=O)O)CC=CCCOC2C(C(C(C(O2)CO)O)O)O	JFDNMLUPLXZXGV-UHFFFAOYSA-N	Lipids and lipid-like molecules	Fatty Acyls	Fatty acyl glycosides
12-Sulfooxy-9,10-Dihydrojasmonic%20Acid	C1CC(=O)C(C1CC(=O)O)CCCCCOS(=O)(=O)O	CJUJDLFIAYZPPV-UHFFFAOYSA-N	Lipids and lipid-like molecules	Fatty Acyls	Lineolic acids and derivatives
2-Oxoheptanedionic%20acid	C(CCC(=O)O)CC(=O)C(=O)O	HABHUTWTLGRDDU-UHFFFAOYSA-N	Organic acids and derivatives	Keto acids and derivatives	Medium-chain keto acids and derivatives
2-trans-abscisic%20acid%20D-glucosyl%20ester	CC1=CC(=O)CC(C1(C=CC(=CC(=O)OC2C(C(C(C(O2)CO)O)O)O)C)O)(C)C	HLVPIMVSSMJFPS-UHFFFAOYSA-N	Lipids and lipid-like molecules	Prenol lipids	Sesquiterpenoids
3-Dehydroshikimic%20acid	C1C(C(C(=O)C=C1C(=O)O)O)O	SLWWJZMPHJJOPH-UHFFFAOYSA-N	Organic oxygen compounds	Organooxygen compounds	Carbonyl compounds
Allantoin	C1(C(=O)NC(=O)N1)NC(=O)N	POJWUDADGALRAB-UHFFFAOYSA-N	Organoheterocyclic compounds	Azoles	Imidazoles
Cis-Aconitic%20acid	C(C(=CC(=O)O)C(=O)O)C(=O)O	GTZCVFVGUGFEME-UHFFFAOYSA-N	Organic acids and derivatives	Carboxylic acids and derivatives	Tricarboxylic acids and derivatives
Creatinine	CN1CC(=O)N=C1N	DDRJAANPRJIHGJ-UHFFFAOYSA-N	Organic acids and derivatives	Carboxylic acids and derivatives	Amino acids, peptides, and analogues
Dihydrojasmonic%20acid	CCCCCC1C(CCC1=O)CC(=O)O	PQEYTAGBXNEUQL-UHFFFAOYSA-N	Lipids and lipid-like molecules	Fatty Acyls	Lineolic acids and derivatives
Fosfosal	C1=CC=C(C(=C1)C(=O)O)OP(=O)(O)O	FFKUDWZICMJVPA-UHFFFAOYSA-N	Organic acids and derivatives	Organic phosphoric acids and derivatives	Phosphate esters
Homocitrate	C(CC(CC(=O)O)(C(=O)O)O)C(=O)O	XKJVEVRQMLKSMO-UHFFFAOYSA-N	Organic acids and derivatives	Carboxylic acids and derivatives	Tricarboxylic acids and derivatives
L-Citramalic%20acid	CC(CC(=O)O)(C(=O)O)O	XFTRTWQBIOMVPK-UHFFFAOYSA-N	Lipids and lipid-like molecules	Fatty Acyls	Fatty acids and conjugates
Methyl%20dihydrojasmonate	CCCCCC1C(CCC1=O)CC(=O)OC	KVWWIYGFBYDJQC-UHFFFAOYSA-N	Lipids and lipid-like molecules	Fatty Acyls	Lineolic acids and derivatives
Mucic%20acid%20Dimethyl%20Ester	COC(=O)C(C(C(C(C(=O)OC)O)O)O)O	WIUSDQLMESEGMW-UHFFFAOYSA-N	Organic oxygen compounds	Organooxygen compounds	Carbohydrates and carbohydrate conjugates
Quinic%20Acid	C1C(C(C(CC1(C(=O)O)O)O)O)O	AAWZDTNXLSGCEK-UHFFFAOYSA-N	Organic oxygen compounds	Organooxygen compounds	Alcohols and polyols
Shikimic%20Acid-3-Phosphate	C1C(C(C(C=C1C(=O)O)OP(=O)(O)O)O)O	QYOJSKGCWNAKGW-UHFFFAOYSA-N	Organic acids and derivatives	Organic phosphoric acids and derivatives	Phosphate esters
Shikimic%20acid	C1C(C(C(C=C1C(=O)O)O)O)O	JXOHGGNKMLTUBP-UHFFFAOYSA-N	Organic oxygen compounds	Organooxygen compounds	Alcohols and polyols
Tartronate%20semialdehyde	C(=O)C(C(=O)O)O	QWBAFPFNGRFSFB-UHFFFAOYSA-N	Organic oxygen compounds	Organooxygen compounds	Carbohydrates and carbohydrate conjugates
Taurocholic%20acid	CC(CCC(=O)NCCS(=O)(=O)O)C1CCC2C1(C(CC3C2C(CC4C3(CCC(C4)O)C)O)O)C	WBWWGRHZICKQGZ-UHFFFAOYSA-N	Lipids and lipid-like molecules	Steroids and steroid derivatives	Bile acids, alcohols and derivatives
2,3-Butanediol%20apiosylglucoside	CC(C(C)OC1C(C(C(C(O1)COC2C(C(CO2)(CO)O)O)O)O)O)O	IXOASERJLNPXSS-UHFFFAOYSA-N	Organic oxygen compounds	Organooxygen compounds	Carbohydrates and carbohydrate conjugates
2-Phenylethyl%20beta-primeveroside	C1C(C(C(C(O1)OCC2C(C(C(C(O2)OCCC3=CC=CC=C3)O)O)O)O)O)O	ZRGXCWYRIBRSQA-UHFFFAOYSA-N	Organic oxygen compounds	Organooxygen compounds	Carbohydrates and carbohydrate conjugates
3'-Deoxy-4-O-methylsappanol	COC1C2=C(C=C(C=C2)O)OCC1(CC3=CC=C(C=C3)O)O	NRDMATSOBGRQDO-UHFFFAOYSA-N	Phenylpropanoids and polyketides	Homoisoflavonoids	Homoisoflavans
Coniferin	COC1=C(C=CC(=C1)C=CCO)OC2C(C(C(C(O2)CO)O)O)O	SFLMUHDGSQZDOW-UHFFFAOYSA-N	Organic oxygen compounds	Organooxygen compounds	Carbohydrates and carbohydrate conjugates
Salidroside	C1=CC(=CC=C1CCOC2C(C(C(C(O2)CO)O)O)O)O	ILRCGYURZSFMEG-UHFFFAOYSA-N	Organic oxygen compounds	Organooxygen compounds	Carbohydrates and carbohydrate conjugates
Syringin	COC1=CC(=CC(=C1OC2C(C(C(C(O2)CO)O)O)O)OC)C=CCO	QJVXKWHHAMZTBY-UHFFFAOYSA-N	Organic oxygen compounds	Organooxygen compounds	Carbohydrates and carbohydrate conjugates
Tyrosol	C1=CC(=CC=C1CCO)O	YCCILVSKPBXVIP-UHFFFAOYSA-N	Benzenoids	Phenols	Tyrosols and derivatives
Vanilloloside	COC1=C(C=CC(=C1)CO)OC2C(C(C(C(O2)CO)O)O)O	SIMPNXWTAVEOTO-UHFFFAOYSA-N	Organic oxygen compounds	Organooxygen compounds	Carbohydrates and carbohydrate conjugates
Verbasoside	CC1C(C(C(C(O1)OC2C(C(OC(C2O)OCCC3=CC(=C(C=C3)O)O)CO)O)O)O)O	DORPKYRPJIIARM-UHFFFAOYSA-N	Organic oxygen compounds	Organooxygen compounds	Carbohydrates and carbohydrate conjugates
3,4-Dihydroxy-3-methoxypropiophenone	COC1=CC(=CC(=C1O)OC)C(=O)CCO	UHOAHNLBCNGCHE-UHFFFAOYSA-N	Organic oxygen compounds	Organooxygen compounds	Carbonyl compounds
3,5-di-tert-Butyl-4-hydroxyacetophenone	CC(=O)C1=CC(=C(C(=C1)C(C)(C)C)O)C(C)(C)C	WGJPGMJLARWHRK-UHFFFAOYSA-N	Organic oxygen compounds	Organooxygen compounds	Carbonyl compounds
4-Hydroxyacetophenone	CC(=O)C1=CC=C(C=C1)O	TXFPEBPIARQUIG-UHFFFAOYSA-N	Organic oxygen compounds	Organooxygen compounds	Carbonyl compounds
5''-Methoxyhexahydrocurcumin	COC1=CC(=CC(=C1O)OC)CCC(CC(=O)CCC2=CC(=C(C=C2)O)OC)O	CAQJIHGGUCTKHW-UHFFFAOYSA-N	Phenylpropanoids and polyketides	Diarylheptanoids	Linear diarylheptanoids
5-hydroxymaltol	CC1=C(C(=O)C(=CO1)O)O	SSSNQLHKSUJJTE-UHFFFAOYSA-N	Organoheterocyclic compounds	Pyrans	Pyranones and derivatives
Frambinone	CC(=O)CCC1=CC=C(C=C1)O	NJGBTKGETPDVIK-UHFFFAOYSA-N	Benzenoids	Phenols	1-hydroxy-2-unsubstituted benzenoids
Gallacetophenone	CC(=O)C1=C(C(=C(C=C1)O)O)O	XIROXSOOOAZHLL-UHFFFAOYSA-N	Organic oxygen compounds	Organooxygen compounds	Carbonyl compounds
Icariside%20E5	COC1=CC(=CC(=C1OC2C(C(C(C(O2)CO)O)O)O)C(CC3=CC(=C(C=C3)O)OC)CO)C=CCO	UFFRBCKYXMEITK-UHFFFAOYSA-N	Phenylpropanoids and polyketides	Stilbenes	Stilbene glycosides
Picein	CC(=O)C1=CC=C(C=C1)OC2C(C(C(C(O2)CO)O)O)O	GOZCEKPKECLKNO-UHFFFAOYSA-N	Organic oxygen compounds	Organooxygen compounds	Carbohydrates and carbohydrate conjugates
Cnidilide	CCCCC1C2CCC=CC2C(=O)O1	UXDIXFDKSPCUIX-UHFFFAOYSA-N	Organoheterocyclic compounds	Isobenzofurans	Unassigned
Neocnidilide	CCCCC1C2CCCC=C2C(=O)O1	UPJFTVFLSIQQAV-UHFFFAOYSA-N	Organoheterocyclic compounds	Isobenzofurans	Unassigned
4-Methoxydiphenylmethane	COC1=CC=C(C=C1)CC2=CC=CC=C2	GQLYCRTUQGSDSM-UHFFFAOYSA-N	Benzenoids	Benzene and substituted derivatives	Diphenylmethanes
Arbutin	C1=CC(=CC=C1O)OC2C(C(C(C(O2)CO)O)O)O	BJRNKVDFDLYUGJ-UHFFFAOYSA-N	Organic oxygen compounds	Organooxygen compounds	Carbohydrates and carbohydrate conjugates
Benzyl%20alcohol%20beta-D-rutinoside	CC1C(C(C(C(O1)OCC2C(C(C(C(O2)OCC3=CC=CC=C3)O)O)O)O)O)O	SMUMBCREXHTKFN-UHFFFAOYSA-N	Organic oxygen compounds	Organooxygen compounds	Carbohydrates and carbohydrate conjugates
Lauramine%20oxide	CCCCCCCCCCCC[N+](C)(C)[O-]	SYELZBGXAIXKHU-UHFFFAOYSA-N	Organic nitrogen compounds	Organonitrogen compounds	Aminoxides
1-(sn-Glycero-3-phospho)-1D-myo-inositol	C(C(COP(=O)(O)OC1C(C(C(C(C1O)O)O)O)O)O)O	BMVUIWJCUQSHLZ-UHFFFAOYSA-N	Lipids and lipid-like molecules	Glycerophospholipids	Glycerophosphoinositols
D-Arabitol	C(C(C(C(CO)O)O)O)O	HEBKCHPVOIAQTA-UHFFFAOYSA-N	Organic oxygen compounds	Organooxygen compounds	Carbohydrates and carbohydrate conjugates
D-Cellobiose	C(C1C(C(C(C(O1)OC2C(OC(C(C2O)O)O)CO)O)O)O)O	GUBGYTABKSRVRQ-UHFFFAOYSA-N	Organic oxygen compounds	Organooxygen compounds	Carbohydrates and carbohydrate conjugates
D-Glucose-1-phosphate	C(C1C(C(C(C(O1)OP(=O)(O)O)O)O)O)O	HXXFSFRBOHSIMQ-UHFFFAOYSA-N	Organic oxygen compounds	Organooxygen compounds	Carbohydrates and carbohydrate conjugates
D-Maltose	C(C1C(C(C(C(O1)OC2C(OC(C(C2O)O)O)CO)O)O)O)O	GUBGYTABKSRVRQ-UHFFFAOYSA-N	Organic oxygen compounds	Organooxygen compounds	Carbohydrates and carbohydrate conjugates
D-Maltotetraose	C(C1C(C(C(C(O1)OC2C(OC(C(C2O)O)OC3C(OC(C(C3O)O)OC4C(OC(C(C4O)O)O)CO)CO)CO)O)O)O)O	LUEWUZLMQUOBSB-UHFFFAOYSA-N	Organic oxygen compounds	Organooxygen compounds	Carbohydrates and carbohydrate conjugates
D-Melezitose	C(C1C(C(C(C(O1)OC2C(C(OC2(CO)OC3C(C(C(C(O3)CO)O)O)O)CO)O)O)O)O)O	QWIZNVHXZXRPDR-UHFFFAOYSA-N	Organic oxygen compounds	Organooxygen compounds	Carbohydrates and carbohydrate conjugates
D-Panose	C(C1C(C(C(C(O1)OCC2C(C(C(C(O2)OC(C(CO)O)C(C(C=O)O)O)O)O)O)O)O)O)O	ZCLAHGAZPPEVDX-UHFFFAOYSA-N	Organic oxygen compounds	Organooxygen compounds	Carbohydrates and carbohydrate conjugates
D-Pinitol	COC1C(C(C(C(C1O)O)O)O)O	DSCFFEYYQKSRSV-UHFFFAOYSA-N	Organic oxygen compounds	Organooxygen compounds	Alcohols and polyols
D-Sucrose	C(C1C(C(C(C(O1)OC2(C(C(C(O2)CO)O)O)CO)O)O)O)O	CZMRCDWAGMRECN-UHFFFAOYSA-N	Organic oxygen compounds	Organooxygen compounds	Carbohydrates and carbohydrate conjugates
D-Trehalose	C(C1C(C(C(C(O1)OC2C(C(C(C(O2)CO)O)O)O)O)O)O)O	HDTRYLNUVZCQOY-UHFFFAOYSA-N	Organic oxygen compounds	Organooxygen compounds	Carbohydrates and carbohydrate conjugates
Dambonitol	COC1C(C(C(C(C1O)OC)O)O)O	MMCIFJWGSIWJLP-UHFFFAOYSA-N	Organic oxygen compounds	Organooxygen compounds	Alcohols and polyols
Dulcitol	C(C(C(C(C(CO)O)O)O)O)O	FBPFZTCFMRRESA-UHFFFAOYSA-N	Organic oxygen compounds	Organooxygen compounds	Carbohydrates and carbohydrate conjugates
Galactinol	C(C1C(C(C(C(O1)OC2C(C(C(C(C2O)O)O)O)O)O)O)O)O	VCWMRQDBPZKXKG-UHFFFAOYSA-N	Organic oxygen compounds	Organooxygen compounds	Carbohydrates and carbohydrate conjugates
Glucan	C(C1C(C(C(C(O1)OC2C(OC(C(C2O)O)OC3C(OC(C(C3O)O)O)CO)CO)O)O)O)O	FYGDTMLNYKFZSV-UHFFFAOYSA-N	Organic oxygen compounds	Organooxygen compounds	Carbohydrates and carbohydrate conjugates
Inositol	C1(C(C(C(C(C1O)O)O)O)O)O	CDAISMWEOUEBRE-UHFFFAOYSA-N	Organic oxygen compounds	Organooxygen compounds	Alcohols and polyols
Isomaltulose	C(C1C(C(C(C(O1)OCC2C(C(C(O2)(CO)O)O)O)O)O)O)O	PVXPPJIGRGXGCY-UHFFFAOYSA-N	Organic oxygen compounds	Organooxygen compounds	Carbohydrates and carbohydrate conjugates
Maltitol	C(C1C(C(C(C(O1)OC(C(CO)O)C(C(CO)O)O)O)O)O)O	VQHSOMBJVWLPSR-UHFFFAOYSA-N	Lipids and lipid-like molecules	Fatty Acyls	Fatty acyl glycosides
Maltotriose	C(C1C(C(C(C(O1)OC2C(OC(C(C2O)O)OC3C(OC(C(C3O)O)O)CO)CO)O)O)O)O	FYGDTMLNYKFZSV-UHFFFAOYSA-N	Organic oxygen compounds	Organooxygen compounds	Carbohydrates and carbohydrate conjugates
Manninotriose	C(C1C(C(C(C(O1)OCC2C(C(C(C(O2)OCC(C(C(C(C=O)O)O)O)O)O)O)O)O)O)O)O	FZWBNHMXJMCXLU-UHFFFAOYSA-N	Lipids and lipid-like molecules	Fatty Acyls	Fatty acyl glycosides
Melibiose	C(C1C(C(C(C(O1)OCC2C(C(C(C(O2)O)O)O)O)O)O)O)O	DLRVVLDZNNYCBX-UHFFFAOYSA-N	Organic oxygen compounds	Organooxygen compounds	Carbohydrates and carbohydrate conjugates
Nystose	C(C1C(C(C(C(O1)OC2(C(C(C(O2)CO)O)O)COC3(C(C(C(O3)CO)O)O)COC4(C(C(C(O4)CO)O)O)CO)O)O)O)O	FLDFNEBHEXLZRX-UHFFFAOYSA-N	Organic oxygen compounds	Organooxygen compounds	Carbohydrates and carbohydrate conjugates
Octose	C(C(C(C(C(C(C(C=O)O)O)O)O)O)O)O	ZEPAXLPHESYSJU-UHFFFAOYSA-N	Organic oxygen compounds	Organooxygen compounds	Carbohydrates and carbohydrate conjugates
Quebrachitol	COC1C(C(C(C(C1O)O)O)O)O	DSCFFEYYQKSRSV-UHFFFAOYSA-N	Organic oxygen compounds	Organooxygen compounds	Alcohols and polyols
Raffinose	C(C1C(C(C(C(O1)OCC2C(C(C(C(O2)OC3(C(C(C(O3)CO)O)O)CO)O)O)O)O)O)O)O	MUPFEKGTMRGPLJ-UHFFFAOYSA-N	Organic oxygen compounds	Organooxygen compounds	Carbohydrates and carbohydrate conjugates
Rengyol	C1CC(CCC1O)(CCO)O	TWORTZAXDSRCIT-UHFFFAOYSA-N	Organic oxygen compounds	Organooxygen compounds	Alcohols and polyols
Solatriose	CC1C(C(C(C(O1)OC2C(C(C(OC2O)CO)O)OC3C(C(C(C(O3)CO)O)O)O)O)O)O	XNBZPOHDTUWNMW-UHFFFAOYSA-N	Organic oxygen compounds	Organooxygen compounds	Carbohydrates and carbohydrate conjugates
Stachyose	C(C1C(C(C(C(O1)OCC2C(C(C(C(O2)OCC3C(C(C(C(O3)OC4(C(C(C(O4)CO)O)O)CO)O)O)O)O)O)O)O)O)O)O	UQZIYBXSHAGNOE-UHFFFAOYSA-N	Organic oxygen compounds	Organooxygen compounds	Carbohydrates and carbohydrate conjugates
Sucrose-6-phosphate	C(C1C(C(C(O1)(CO)OC2C(C(C(C(O2)COP(=O)(O)O)O)O)O)O)O)O	WQQSIXKPRAUZJL-UHFFFAOYSA-N	Organic oxygen compounds	Organooxygen compounds	Carbohydrates and carbohydrate conjugates
Trehalosamine	C(C1C(C(C(C(O1)OC2C(C(C(C(O2)CO)O)O)O)N)O)O)O	YSVQUZOHQULZQP-UHFFFAOYSA-N	Organic oxygen compounds	Organooxygen compounds	Carbohydrates and carbohydrate conjugates
Trehalose%206-phosphate	C(C1C(C(C(C(O1)OC2C(C(C(C(O2)COP(=O)(O)O)O)O)O)O)O)O)O	LABSPYBHMPDTEL-UHFFFAOYSA-N	Organic oxygen compounds	Organooxygen compounds	Carbohydrates and carbohydrate conjugates
D-Pantothenic%20Acid%204'-O-Beta-Glucoside	CC(C)(COC1C(C(C(C(O1)CO)O)O)O)C(C(=O)NCCC(=O)O)O	GMURXYJSTRMISD-UHFFFAOYSA-N	Lipids and lipid-like molecules	Fatty Acyls	Fatty acyl glycosides
Nicotinic%20acid%20(Vitamin%20B3)	C1=CC(=CN=C1)C(=O)O	PVNIIMVLHYAWGP-UHFFFAOYSA-N	Organoheterocyclic compounds	Pyridines and derivatives	Pyridinecarboxylic acids and derivatives
Riboflavin%20(Vitamin%20B2)	CC1=CC2=C(C=C1C)N(C3=NC(=O)NC(=O)C3=N2)CC(C(C(CO)O)O)O	AUNGANRZJHBGPY-UHFFFAOYSA-N	Organoheterocyclic compounds	Pteridines and derivatives	Alloxazines and isoalloxazines
1-Caffeoylquinic%20acid	C1C(C(C(CC1(C(=O)O)OC(=O)C=CC2=CC(=C(C=C2)O)O)O)O)O	GWTUHAXUUFROTF-UHFFFAOYSA-N	Organic oxygen compounds	Organooxygen compounds	Alcohols and polyols
1-O-p-Cumaroylglycerol	C1=CC(=CC=C1C=CC(=O)OCC(CO)O)O	YUQSZTOOHLGKGG-UHFFFAOYSA-N	Phenylpropanoids and polyketides	Cinnamic acids and derivatives	Hydroxycinnamic acids and derivatives
2-O-P-Coumaroylhydroxycitric%20Acid	C1=CC(=CC=C1C=CC(=O)OC(C(=O)O)C(CC(=O)O)(C(=O)O)O)O	ZHUVVSHTKJAVQB-UHFFFAOYSA-N	Phenylpropanoids and polyketides	Cinnamic acids and derivatives	Hydroxycinnamic acids and derivatives
3,4,5-Tricaffeoylquinic%20acid	C1C(C(C(CC1(C(=O)O)O)OC(=O)C=CC2=CC(=C(C=C2)O)O)OC(=O)C=CC3=CC(=C(C=C3)O)O)OC(=O)C=CC4=CC(=C(C=C4)O)O	OAFXTKGAKYAFSI-UHFFFAOYSA-N	Organic oxygen compounds	Organooxygen compounds	Alcohols and polyols
3,4-Di-O-caffeoylquinic%20acid%20methyl%20ester	COC(=O)C1(CC(C(C(C1)OC(=O)C=CC2=CC(=C(C=C2)O)O)OC(=O)C=CC3=CC(=C(C=C3)O)O)O)O	PKJBSZTYNDRXEQ-UHFFFAOYSA-N	Organic oxygen compounds	Organooxygen compounds	Alcohols and polyols
3,5-Dicaffeoylquinic%20acid	C1C(C(C(CC1(C(=O)O)O)OC(=O)C=CC2=CC(=C(C=C2)O)O)O)OC(=O)C=CC3=CC(=C(C=C3)O)O	KRZBCHWVBQOTNZ-UHFFFAOYSA-N	Organic oxygen compounds	Organooxygen compounds	Alcohols and polyols
3-O-Feruloylquinic%20acid	COC1=C(C=CC(=C1)C=CC(=O)OC2CC(CC(C2O)O)(C(=O)O)O)O	RAGZUCNPTLULOL-UHFFFAOYSA-N	Organic oxygen compounds	Organooxygen compounds	Alcohols and polyols
3-O-p-Coumaroylquinic%20acid	C1C(C(C(CC1(C(=O)O)O)OC(=O)C=CC2=CC=C(C=C2)O)O)O	BMRSEYFENKXDIS-UHFFFAOYSA-N	Organic oxygen compounds	Organooxygen compounds	Alcohols and polyols
4-O-Coumaroylquinic%20acid	C1C(C(C(CC1(C(=O)O)O)O)OC(=O)C=CC2=CC=C(C=C2)O)O	XWRHBGVVCOSNKO-UHFFFAOYSA-N	Organic oxygen compounds	Organooxygen compounds	Alcohols and polyols
4-O-Feruloylquinic%20acid	COC1=C(C=CC(=C1)C=CC(=O)OC2C(CC(CC2O)(C(=O)O)O)O)O	VTMFDSJJVNQXLT-UHFFFAOYSA-N	Organic oxygen compounds	Organooxygen compounds	Alcohols and polyols
4-caffeoylshikimic%20acid	C1C(C(C(C=C1C(=O)O)O)OC(=O)C=CC2=CC(=C(C=C2)O)O)O	VTURJKQJEXSKNY-UHFFFAOYSA-N	Phenylpropanoids and polyketides	Cinnamic acids and derivatives	Hydroxycinnamic acids and derivatives
5-O-(3'-O-Glucosylcaffeoyl)Quinic%20Acid	C1C(C(C(CC1(C(=O)O)O)OC(=O)C=CC2=CC(=C(C=C2)OC3C(C(C(C(O3)CO)O)O)O)O)O)O	ABXYVNGLNANCOI-UHFFFAOYSA-N	Phenylpropanoids and polyketides	Tannins	Hydrolyzable tannins
5-O-Caffeoylshikimic%20acid	C1C(C(C(C=C1C(=O)O)O)O)OC(=O)C=CC2=CC(=C(C=C2)O)O	QMPHZIPNNJOWQI-UHFFFAOYSA-N	Phenylpropanoids and polyketides	Cinnamic acids and derivatives	Hydroxycinnamic acids and derivatives
5-O-Coumaroylquinic%20acid	C1C(C(C(CC1(C(=O)O)O)OC(=O)C=CC2=CC=C(C=C2)O)O)O	BMRSEYFENKXDIS-UHFFFAOYSA-N	Organic oxygen compounds	Organooxygen compounds	Alcohols and polyols
5-O-Feruloylquinic%20acid	COC1=C(C=CC(=C1)C=CC(=O)OC2CC(CC(C2O)O)(C(=O)O)O)O	RAGZUCNPTLULOL-UHFFFAOYSA-N	Organic oxygen compounds	Organooxygen compounds	Alcohols and polyols
Acteoside;%20Verbascoside	CC1C(C(C(C(O1)OC2C(C(OC(C2OC(=O)C=CC3=CC(=C(C=C3)O)O)CO)OCCC4=CC(=C(C=C4)O)O)O)O)O)O	FBSKJMQYURKNSU-UHFFFAOYSA-N	Phenylpropanoids and polyketides	Cinnamic acids and derivatives	Hydroxycinnamic acids and derivatives
Anacardic%20acid	CCCCCCCCCCCCCCCC1=C(C(=CC=C1)O)C(=O)O	ADFWQBGTDJIESE-UHFFFAOYSA-N	Benzenoids	Benzene and substituted derivatives	Benzoic acids and derivatives
Caffeic%20acid%204-O-glucoside	C1=CC(=C(C=C1C=CC(=O)O)O)OC2C(C(C(C(O2)CO)O)O)O	OHEYCHKLBCPRLZ-UHFFFAOYSA-N	Organic oxygen compounds	Organooxygen compounds	Carbohydrates and carbohydrate conjugates
Chlorogenic%20acid%20methyl%20ester	COC(=O)C1(CC(C(C(C1)OC(=O)C=CC2=CC(=C(C=C2)O)O)O)O)O	MZNIJRAPCCELQX-UHFFFAOYSA-N	Organic oxygen compounds	Organooxygen compounds	Alcohols and polyols
Echinacoside	CC1C(C(C(C(O1)OC2C(C(OC(C2OC(=O)C=CC3=CC(=C(C=C3)O)O)COC4C(C(C(C(O4)CO)O)O)O)OCCC5=CC(=C(C=C5)O)O)O)O)O)O	FSBUXLDOLNLABB-UHFFFAOYSA-N	Organic oxygen compounds	Organooxygen compounds	Carbohydrates and carbohydrate conjugates
Gallein	C1=CC=C2C(=C1)C(=O)OC23C4=C(C(=C(C=C4)O)O)OC5=C3C=CC(=C5O)O	PHLYOKFVXIVOJC-UHFFFAOYSA-N	Organoheterocyclic compounds	Benzopyrans	1-benzopyrans
Gallic%20Acid%204-O-Glucoside	C1=C(C=C(C(=C1O)OC2C(C(C(C(O2)CO)O)O)O)O)C(=O)O	YPSNWSNUXIIKHO-UHFFFAOYSA-N	Organic oxygen compounds	Organooxygen compounds	Carbohydrates and carbohydrate conjugates
Glucosyringic%20acid	COC1=CC(=CC(=C1OC2C(C(C(C(O2)CO)O)O)O)OC)C(=O)O	BLKMDORKRDACEI-UHFFFAOYSA-N	Phenylpropanoids and polyketides	Tannins	Hydrolyzable tannins
Grandidentatin	C1CCC(C(C1)O)OC2C(C(C(C(O2)CO)O)O)OC(=O)C=CC3=CC=C(C=C3)O	ZTMPDTJBTNGZJH-UHFFFAOYSA-N	Phenylpropanoids and polyketides	Cinnamic acids and derivatives	Hydroxycinnamic acids and derivatives
Isoacteoside	CC1C(C(C(C(O1)OC2C(C(OC(C2O)OCCC3=CC(=C(C=C3)O)O)COC(=O)C=CC4=CC(=C(C=C4)O)O)O)O)O)O	FNMHEHXNBNCPCI-UHFFFAOYSA-N	Phenylpropanoids and polyketides	Cinnamic acids and derivatives	Hydroxycinnamic acids and derivatives
Isochlorogenic%20acid%20A	C1C(C(C(CC1(C(=O)O)O)OC(=O)C=CC2=CC(=C(C=C2)O)O)O)OC(=O)C=CC3=CC(=C(C=C3)O)O	KRZBCHWVBQOTNZ-UHFFFAOYSA-N	Organic oxygen compounds	Organooxygen compounds	Alcohols and polyols
Isochlorogenic%20acid%20B	C1C(C(C(CC1(C(=O)O)O)OC(=O)C=CC2=CC(=C(C=C2)O)O)OC(=O)C=CC3=CC(=C(C=C3)O)O)O	UFCLZKMFXSILNL-UHFFFAOYSA-N	Organic oxygen compounds	Organooxygen compounds	Alcohols and polyols
Isochlorogenic%20acid%20C	C1C(C(C(CC1(C(=O)O)O)OC(=O)C=CC2=CC(=C(C=C2)O)O)OC(=O)C=CC3=CC(=C(C=C3)O)O)O	UFCLZKMFXSILNL-UHFFFAOYSA-N	Organic oxygen compounds	Organooxygen compounds	Alcohols and polyols
Isocrenatoside	CC1C(C(C(C(O1)OC2C(C(OC3C2OC(CO3)C4=CC(=C(C=C4)O)O)COC(=O)C=CC5=CC(=C(C=C5)O)O)O)O)O)O	FYNJOHBQQZWZTB-UHFFFAOYSA-N	Phenylpropanoids and polyketides	Cinnamic acids and derivatives	Hydroxycinnamic acids and derivatives
Poliumoside	CC1C(C(C(C(O1)OCC2C(C(C(C(O2)OCCC3=CC(=C(C=C3)O)O)O)OC4C(C(C(C(O4)C)O)O)O)OC(=O)C=CC5=CC(=C(C=C5)O)O)O)O)O	YMWRMAOPKNYHMZ-UHFFFAOYSA-N	Organic oxygen compounds	Organooxygen compounds	Carbohydrates and carbohydrate conjugates
Protocatechuic%20acid%204-O-beta-glucoside	C1=CC(=C(C=C1C(=O)O)O)OC2C(C(C(C(O2)CO)O)O)O	HFFREILXLCWCQH-UHFFFAOYSA-N	Organic oxygen compounds	Organooxygen compounds	Carbohydrates and carbohydrate conjugates
Purpureaside%20C	CC1C(C(C(C(O1)OC2C(C(OC(C2OC(=O)C=CC3=CC(=C(C=C3)O)O)COC4C(C(C(C(O4)CO)O)O)O)OCCC5=CC(=C(C=C5)O)O)O)O)O)O	FSBUXLDOLNLABB-UHFFFAOYSA-N	Organic oxygen compounds	Organooxygen compounds	Carbohydrates and carbohydrate conjugates
Rosmarinic%20acid	C1=CC(=C(C=C1CC(C(=O)O)OC(=O)C=CC2=CC(=C(C=C2)O)O)O)O	DOUMFZQKYFQNTF-UHFFFAOYSA-N	Phenylpropanoids and polyketides	Cinnamic acids and derivatives	Hydroxycinnamic acids and derivatives
Rosmarinic%20acid%20methyl%20ester	COC(=O)C(CC1=CC(=C(C=C1)O)O)OC(=O)C=CC2=CC(=C(C=C2)O)O	XHALVRQBZGZHFE-UHFFFAOYSA-N	Phenylpropanoids and polyketides	Cinnamic acids and derivatives	Hydroxycinnamic acids and derivatives
Salirepin	C1=CC(=C(C=C1O)CO)OC2C(C(C(C(O2)CO)O)O)O	NPNFZOGKIFFKGT-UHFFFAOYSA-N	Organic oxygen compounds	Organooxygen compounds	Carbohydrates and carbohydrate conjugates
Schizotenuin%20F	COC(=O)C(=CC1=CC(=C(C=C1)O)O)OC2=C(C=C(C=C2)C=CC(=O)OC(CC3=CC(=C(C=C3)O)O)C(=O)O)O	JRSJLGASDWZQGF-UHFFFAOYSA-N	Benzenoids	Benzene and substituted derivatives	Phenylpyruvic acid derivatives
Tachioside	COC1=C(C=CC(=C1)OC2C(C(C(C(O2)CO)O)O)O)O	KWVHACHAQJFTLZ-UHFFFAOYSA-N	Organic oxygen compounds	Organooxygen compounds	Carbohydrates and carbohydrate conjugates
Trichocarposide	C1=CC=C(C(=C1)CO)OC2C(C(C(C(O2)COC(=O)C=CC3=CC=C(C=C3)O)O)O)O	ODOVSOIHEQVVMZ-UHFFFAOYSA-N	Organic oxygen compounds	Organooxygen compounds	Carbohydrates and carbohydrate conjugates
Vanillic%20acid%20glucoside	COC1=C(C=CC(=C1)C(=O)O)OC2C(C(C(C(O2)CO)O)O)O	JYFOSWJYZIVJPO-UHFFFAOYSA-N	Phenylpropanoids and polyketides	Tannins	Hydrolyzable tannins
Aloe-Emodin-9-Anthrone	C1C2=C(C(=CC=C2)O)C(=O)C3=C1C=C(C=C3O)CO	AVZIASIVCYCZND-UHFFFAOYSA-N	Benzenoids	Anthracenes	Unassigned
Emodin	CC1=CC2=C(C(=C1)O)C(=O)C3=C(C2=O)C=C(C=C3O)O	RHMXXJGYXNZAPX-UHFFFAOYSA-N	Benzenoids	Anthracenes	Anthraquinones
Procyanidin%20B2	C1C(C(OC2=C1C(=CC(=C2C3C(C(OC4=CC(=CC(=C34)O)O)C5=CC(=C(C=C5)O)O)O)O)O)C6=CC(=C(C=C6)O)O)O	XFZJEEAOWLFHDH-UHFFFAOYSA-N	Phenylpropanoids and polyketides	Flavonoids	Biflavonoids and polyflavonoids
3,3',4-O-Trimethylellagic%20acid	COC1=C(C2=C3C(=C1)C(=O)OC4=C3C(=CC(=C4OC)O)C(=O)O2)OC	LXEQIOGTMDLLEC-UHFFFAOYSA-N	Phenylpropanoids and polyketides	Tannins	Hydrolyzable tannins
Cinnamtannin%20B1	C1C(C(OC2=C1C(=CC(=C2C3C(C(OC4=C3C(=CC5=C4C6C(C(O5)(OC7=CC(=CC(=C67)O)O)C8=CC(=C(C=C8)O)O)O)O)C9=CC(=C(C=C9)O)O)O)O)O)C1=CC(=C(C=C1)O)O)O	BYSRPHRKESMCPO-UHFFFAOYSA-N	Phenylpropanoids and polyketides	Flavonoids	Biflavonoids and polyflavonoids
Cinnamtannin%20D1	C1C(C(OC2=C1C(=CC(=C2C3C(C(OC4=C3C(=CC5=C4C6C(C(O5)(OC7=CC(=CC(=C67)O)O)C8=CC(=C(C=C8)O)O)O)O)C9=CC(=C(C=C9)O)O)O)O)O)C1=CC(=C(C=C1)O)O)O	BYSRPHRKESMCPO-UHFFFAOYSA-N	Phenylpropanoids and polyketides	Flavonoids	Biflavonoids and polyflavonoids
12-Hydroxyabietic%20Acid	CC(C)C1=CC2=CCC3C(C2CC1O)(CCCC3(C)C(=O)O)C	DYNISIGUMYFVJW-UHFFFAOYSA-N	Lipids and lipid-like molecules	Prenol lipids	Diterpenoids
7-Oxodehydroabietic%20acid	CC(C)C1=CC2=C(C=C1)C3(CCCC(C3CC2=O)(C)C(=O)O)C	MSWJSDLNPCSSNW-UHFFFAOYSA-N	Lipids and lipid-like molecules	Prenol lipids	Diterpenoids
Aldovibsanin%20C	CC1=C(C2C(C1)C(=O)C(=CCC2(C)CC=CC(C)(C)O)CO)C=O	GCEMWHSWGVIYRO-UHFFFAOYSA-N	Lipids and lipid-like molecules	Prenol lipids	Diterpenoids
Dehydroabietic%20acid	CC(C)C1=CC2=C(C=C1)C3(CCCC(C3CC2)(C)C(=O)O)C	NFWKVWVWBFBAOV-UHFFFAOYSA-N	Lipids and lipid-like molecules	Prenol lipids	Diterpenoids
Ferruginol	CC(C)C1=C(C=C2C(=C1)CCC3C2(CCCC3(C)C)C)O	QXNWVJOHUAQHLM-UHFFFAOYSA-N	Lipids and lipid-like molecules	Prenol lipids	Diterpenoids
Grayanotoxin%20VII	CC1=CC23CC(C4(C(CC(C4(C)C)O)C(=C)C2CCC1C3O)O)O	GIUXMMHBAIUPAN-UHFFFAOYSA-N	Organic oxygen compounds	Organooxygen compounds	Alcohols and polyols
Hispanolone	CC1C(=O)CC2C(CCCC2(C1(CCC3=COC=C3)O)C)(C)C	UVKYPKNCQJIGKV-UHFFFAOYSA-N	Lipids and lipid-like molecules	Prenol lipids	Diterpenoids
Isopimaric%20acid	CC1(CCC2C(=CCC3C2(CCCC3(C)C(=O)O)C)C1)C=C	MXYATHGRPJZBNA-UHFFFAOYSA-N	Lipids and lipid-like molecules	Prenol lipids	Diterpenoids
Javanicolide%20C	CC1C2CC3C45COC(C4C(C(=O)O3)OC(=O)C=C(C)C)(C(C(C5C2(CC(C1O)O)C)O)O)C(=O)OC	HGWAIHIPTWRNHL-UHFFFAOYSA-N	Lipids and lipid-like molecules	Prenol lipids	Terpene lactones
Jolkinolide%20B	CC1=C2C3C4(O3)CCC5C(CCCC5(C4C6C2(O6)OC1=O)C)(C)C	SOVOCMGDFRGRKF-UHFFFAOYSA-N	Organoheterocyclic compounds	Naphthofurans	Unassigned
Kaurane-16,17-diol	CC1(CCCC2(C1CCC34C2CCC(C3)C(C4)(CO)O)C)C	LCYWCTWYVKIBSA-UHFFFAOYSA-N	Lipids and lipid-like molecules	Prenol lipids	Diterpenoids
Kaurenoic%20Acid	CC12CCCC(C1CCC34C2CCC(C3)C(=C)C4)(C)C(=O)O	NIKHGUQULKYIGE-UHFFFAOYSA-N	Lipids and lipid-like molecules	Prenol lipids	Diterpenoids
Mascaroside%20I	CC12CC(=O)C3=C(C1CCC45C2C(CC(C4)C(C5)(COC6C(C(C(C(O6)CO)O)O)O)O)O)C=CO3	CBVLNMNYILSPBN-UHFFFAOYSA-N	Organoheterocyclic compounds	Naphthofurans	Unassigned
Mascaroside%20II	CC12CC(=O)C3=C(C1CCC45C2C6CC(C4)C(C5)(O6)COC7C(C(C(C(O7)CO)O)O)O)C=CO3	QLWPXZGDNPSROH-UHFFFAOYSA-N	Organoheterocyclic compounds	Naphthopyrans	Unassigned
Pimaric%20acid	CC1(CCC2C(=C1)CCC3C2(CCCC3(C)C(=O)O)C)C=C	MHVJRKBZMUDEEV-UHFFFAOYSA-N	Lipids and lipid-like molecules	Prenol lipids	Diterpenoids
Sandaracopimaric%20acid	CC1(CCC2C(=C1)CCC3C2(CCCC3(C)C(=O)O)C)C=C	MHVJRKBZMUDEEV-UHFFFAOYSA-N	Lipids and lipid-like molecules	Prenol lipids	Diterpenoids
trans-communic%20acid	CC(=CCC1C(=C)CCC2C1(CCCC2(C)C(=O)O)C)C=C	YGBZFOQXPOGACY-UHFFFAOYSA-N	Lipids and lipid-like molecules	Prenol lipids	Diterpenoids
tripterifordin	CC12CCCC3(C1CCC45C3CCC(C4)C(C5)(C)O)COC2=O	KLMZPLYXGZZBCX-UHFFFAOYSA-N	Lipids and lipid-like molecules	Prenol lipids	Terpene lactones
6-DeoxyCatalpol	C1C2C=COC(C2C3(C1O3)CO)OC4C(C(C(C(O4)CO)O)O)O	DHSHYQJABUIJDG-UHFFFAOYSA-N	Organic oxygen compounds	Organooxygen compounds	Carbohydrates and carbohydrate conjugates
7-Deoxyloganic%20acid	CC1CCC2C1C(OC=C2C(=O)O)OC3C(C(C(C(O3)CO)O)O)O	DSXFHNSGLYXPNG-UHFFFAOYSA-N	Lipids and lipid-like molecules	Prenol lipids	Terpene glycosides
8-Epideoxyloganic%20acid	CC1CCC2C1C(OC=C2C(=O)O)OC3C(C(C(C(O3)CO)O)O)O	DSXFHNSGLYXPNG-UHFFFAOYSA-N	Lipids and lipid-like molecules	Prenol lipids	Terpene glycosides
Asperulosidic%20acid	CC(=O)OCC1=CC(C2C1C(OC=C2C(=O)O)OC3C(C(C(C(O3)CO)O)O)O)O	DGDWCRWJRNMRKX-UHFFFAOYSA-N	Lipids and lipid-like molecules	Prenol lipids	Terpene glycosides
Ebuloside	CC1C2C(CC1=O)C(=COC2OC(=O)CC(C)C)COC3C(C(C(C(O3)CO)O)O)O	XKQWFBQKSSYGBS-UHFFFAOYSA-N	Lipids and lipid-like molecules	Prenol lipids	Terpene glycosides
Gardenoside	COC(=O)C1=COC(C2C1C=CC2(CO)O)OC3C(C(C(C(O3)CO)O)O)O	XJMPAUZQVRGFRE-UHFFFAOYSA-N	Lipids and lipid-like molecules	Prenol lipids	Terpene glycosides
Genameside%20C	COC(=O)C1=COC(C2C1CC=C2CO)OC3C(C(C(C(O3)CO)OC4C(C(C(C(O4)CO)O)O)O)O)O	JRYVBZDSFXDJAN-UHFFFAOYSA-N	Lipids and lipid-like molecules	Prenol lipids	Terpene glycosides
Genameside%20D	COC(=O)C1=COC(C2C1CC=C2COC3C(C(C(C(O3)CO)O)O)O)OC4C(C(C(C(O4)CO)O)O)O	BNXFBCBJALNHOV-UHFFFAOYSA-N	Lipids and lipid-like molecules	Prenol lipids	Terpene glycosides
Geniposide	COC(=O)C1=COC(C2C1CC=C2CO)OC3C(C(C(C(O3)CO)O)O)O	IBFYXTRXDNAPMM-UHFFFAOYSA-N	Lipids and lipid-like molecules	Prenol lipids	Terpene glycosides
Geniposidic%20acid	C1C=C(C2C1C(=COC2OC3C(C(C(C(O3)CO)O)O)O)C(=O)O)CO	ZJDOESGVOWAULF-UHFFFAOYSA-N	Lipids and lipid-like molecules	Prenol lipids	Terpene glycosides
Irone	CC1CC=C(C(C1(C)C)C=CC(=O)C)C	JZQOJFLIJNRDHK-UHFFFAOYSA-N	Lipids and lipid-like molecules	Prenol lipids	Sesquiterpenoids
Ixoroside	CC1(CC(C2C1C(OC=C2C=O)OC3C(C(C(C(O3)CO)O)O)O)O)O	UCBVASFDLSVHRZ-UHFFFAOYSA-N	Lipids and lipid-like molecules	Prenol lipids	Terpene glycosides
Jasminoside%20B	CC1(CC(=O)C=C(C1CO)COC2C(C(C(C(O2)CO)O)O)O)C	XBRXLXOCHNGHBC-UHFFFAOYSA-N	Organic oxygen compounds	Organooxygen compounds	Carbohydrates and carbohydrate conjugates
Jasminoside%20N	CC(=CCCC(=CCOC1C(C(C(C(O1)COC2C(C(C(C(O2)CO)O)O)O)O)O)O)C)C	GOGLDSNWBWSTJG-UHFFFAOYSA-N	Lipids and lipid-like molecules	Prenol lipids	Terpene glycosides
Loganetin	CC1C(CC2C1C(OC=C2C(=O)OC)O)O	XWOHZIIPBYAMJX-UHFFFAOYSA-N	Lipids and lipid-like molecules	Prenol lipids	Monoterpenoids
Loliolide	CC1(CC(CC2(C1=CC(=O)O2)C)O)C	XEVQXKKKAVVSMW-UHFFFAOYSA-N	Organoheterocyclic compounds	Benzofurans	Unassigned
Oleuropein	CC=C1C(C(=COC1OC2C(C(C(C(O2)CO)O)O)O)C(=O)OC)CC(=O)OCCC3=CC(=C(C=C3)O)O	RFWGABANNQMHMZ-UHFFFAOYSA-N	Lipids and lipid-like molecules	Prenol lipids	Terpene glycosides
Paederoside	CSC(=O)OCC1=CC2C3C1C(OC=C3C(=O)O2)OC4C(C(C(C(O4)CO)O)O)O	OJISWUQNQQWEND-UHFFFAOYSA-N	Organic oxygen compounds	Organooxygen compounds	Carbohydrates and carbohydrate conjugates
Picroside%20II	COC1=C(C=CC(=C1)C(=O)OC2C3C=COC(C3C4(C2O4)CO)OC5C(C(C(C(O5)CO)O)O)O)O	AKNILCMFRRDTEY-UHFFFAOYSA-N	Phenylpropanoids and polyketides	Tannins	Hydrolyzable tannins
Robinlin	CC1=C(C(CC(C1=O)O)(C)C)CCO	QIOYKXMTBUDZHZ-UHFFFAOYSA-N	Organic oxygen compounds	Organooxygen compounds	Carbonyl compounds
Safranal	CC1=C(C(CC=C1)(C)C)C=O	SGAWOGXMMPSZPB-UHFFFAOYSA-N	Organic oxygen compounds	Organic oxides	Unassigned
Scandoside	C1=C(C2C(C1O)C(=COC2OC3C(C(C(C(O3)CO)O)O)O)C(=O)O)CO	ZVXWFPTVHBWJOU-UHFFFAOYSA-N	Lipids and lipid-like molecules	Prenol lipids	Terpene glycosides
Secoxyloganin	COC(=O)C1=COC(C(C1CC(=O)O)C=C)OC2C(C(C(C(O2)CO)O)O)O	MQLSOVRLZHTATK-UHFFFAOYSA-N	Lipids and lipid-like molecules	Prenol lipids	Terpene glycosides
Shanzhiside%20methyl%20ester	CC1(CC(C2C1C(OC=C2C(=O)OC)OC3C(C(C(C(O3)CO)O)O)O)O)O	KKSYAZCUYVRKML-UHFFFAOYSA-N	Lipids and lipid-like molecules	Prenol lipids	Terpene glycosides
Sweroside	C=CC1C2CCOC(=O)C2=COC1OC3C(C(C(C(O3)CO)O)O)O	VSJGJMKGNMDJCI-UHFFFAOYSA-N	Organic oxygen compounds	Organooxygen compounds	Carbohydrates and carbohydrate conjugates
Swertiamarin	C=CC1C(OC=C2C1(CCOC2=O)O)OC3C(C(C(C(O3)CO)O)O)O	HEYZWPRKKUGDCR-UHFFFAOYSA-N	Organic oxygen compounds	Organooxygen compounds	Carbohydrates and carbohydrate conjugates
Vogeloside	COC1CC2C(C(OC=C2C(=O)O1)OC3C(C(C(C(O3)CO)O)O)O)C=C	RAYZRCGMIDUTKS-UHFFFAOYSA-N	Organic oxygen compounds	Organooxygen compounds	Carbohydrates and carbohydrate conjugates
cis-Citral	CC(=CCCC(=CC=O)C)C	WTEVQBCEXWBHNA-UHFFFAOYSA-N	Lipids and lipid-like molecules	Prenol lipids	Monoterpenoids
5-Acetoxy-12-hydroxyfarnesol	CC(=CC(CC(=CCO)C)OC(=O)C)CCC=C(C)CO	YVXXFTKPCWYGHH-UHFFFAOYSA-N	Lipids and lipid-like molecules	Prenol lipids	Sesquiterpenoids
Abscisic%20acid	CC1=CC(=O)CC(C1(C=CC(=CC(=O)O)C)O)(C)C	JLIDBLDQVAYHNE-UHFFFAOYSA-N	Lipids and lipid-like molecules	Prenol lipids	Sesquiterpenoids
Aristolone	CC1CCCC2=CC(=O)C3C(C12C)C3(C)C	UGVIZCBJCSXBCJ-UHFFFAOYSA-N	Lipids and lipid-like molecules	Prenol lipids	Sesquiterpenoids
Codonolactone	CC1=C2CC3C(=C)CCCC3(CC2(OC1=O)O)C	FBMORZZOJSDNRQ-UHFFFAOYSA-N	Lipids and lipid-like molecules	Prenol lipids	Terpene lactones
Curcumol	CC1CCC2C13CC(C(O3)(CC2=C)O)C(C)C	QRMPRVXWPCLVNI-UHFFFAOYSA-N	Lipids and lipid-like molecules	Prenol lipids	Sesquiterpenoids
Elemol	CC(=C)C1CC(CCC1(C)C=C)C(C)(C)O	GFJIQNADMLPFOW-UHFFFAOYSA-N	Lipids and lipid-like molecules	Prenol lipids	Sesquiterpenoids
Nootkatone	CC1CC(=O)C=C2C1(CC(CC2)C(=C)C)C	WTOYNNBCKUYIKC-UHFFFAOYSA-N	Lipids and lipid-like molecules	Prenol lipids	Sesquiterpenoids
Roseoside	CC1=CC(=O)CC(C1(C=CC(C)OC2C(C(C(C(O2)CO)O)O)O)O)(C)C	SWYRVCGNMNAFEK-UHFFFAOYSA-N	Lipids and lipid-like molecules	Fatty Acyls	Fatty acyl glycosides
Tussilagonone	CCC(=CC(=O)OC1CC(C2C(C1=C)CC(=O)C2=CC)C(C)C)C	ORVROQPLYIDWBD-UHFFFAOYSA-N	Lipids and lipid-like molecules	Prenol lipids	Sesquiterpenoids
phomophyllin%20A	CC1=C2C(CCO2)(C3CC(C=C3C1=O)(C)C)C	IWCUKSMMOSRCHQ-UHFFFAOYSA-N	Organic oxygen compounds	Organooxygen compounds	Carbonyl compounds
8-Epiloganin	CC1C(CC2C1C(OC=C2C(=O)OC)OC3C(C(C(C(O3)CO)O)O)O)O	AMBQHHVBBHTQBF-UHFFFAOYSA-N	Lipids and lipid-like molecules	Prenol lipids	Terpene glycosides
Icariside%20B1	CC(=O)C=C=C1C(CC(CC1(C)O)OC2C(C(C(C(O2)CO)O)O)O)(C)C	OSUSRWMGHUUXBY-UHFFFAOYSA-N	Lipids and lipid-like molecules	Prenol lipids	Terpene glycosides
Isololiolide	CC1(CC(CC2(C1=CC(=O)O2)C)O)C	XEVQXKKKAVVSMW-UHFFFAOYSA-N	Organoheterocyclic compounds	Benzofurans	Unassigned
Methyl%208,9-epoxypimaran-18-oate	CCC1(CCC23C4(CCCC(C4CCC2(C1)O3)(C)C(=O)OC)C)C	ZYTYEZCKOXKTLX-UHFFFAOYSA-N	Organoheterocyclic compounds	Oxepanes	Unassigned
2,3,19,23-Tetrahydroxyurs-12-en-28-oic%20acid	CC1CCC2(CCC3(C(=CCC4C3(CCC5C4(CC(C(C5(C)CO)O)O)C)C)C2C1(C)O)C)C(=O)O	YCOKATFNRPZIIU-UHFFFAOYSA-N	Lipids and lipid-like molecules	Prenol lipids	Triterpenoids
2,3,23-Trihydroxyolean-12-en-28-oic%20acid	CC1(CCC2(CCC3(C(=CCC4C3(CCC5C4(CC(C(C5(C)CO)O)O)C)C)C2C1)C)C(=O)O)C	RWNHLTKFBKYDOJ-UHFFFAOYSA-N	Lipids and lipid-like molecules	Prenol lipids	Triterpenoids
2,3,23-Trihydroxyurs-12-en-28-oic%20acid	CC1CCC2(CCC3(C(=CCC4C3(CCC5C4(CC(C(C5(C)CO)O)O)C)C)C2C1C)C)C(=O)O	JXSVIVRDWWRQRT-UHFFFAOYSA-N	Lipids and lipid-like molecules	Prenol lipids	Triterpenoids
Bruceajavanone%20B	CC=C(C)C(=O)OC1CC2(C(CC=C2C3(C1C4(C=CC(=O)C(C4CC3OC(=O)C)(C)C)C)C)C5CC(OC5OC(=O)C)C6C(O6)(C)C)C	VHSSRYWNDNRRKP-UHFFFAOYSA-N	Lipids and lipid-like molecules	Prenol lipids	Triterpenoids
Integracide%20H	CC(C)C(=C)CCC(C)C1CC=C2C1(C(C(C3=C2CCC4C3(CC(C(C4(C)C)OC(=O)C)OC(=O)C)C)O)OC(=O)C)C	OSBLHZRBOYLWMH-UHFFFAOYSA-N	Lipids and lipid-like molecules	Steroids and steroid derivatives	Ergostane steroids
Morolic%20acid	CC1(CCC2(CCC3(C(C2=C1)CCC4C3(CCC5C4(CCC(C5(C)C)O)C)C)C)C(=O)O)C	RGZSSKBTFGNUCG-UHFFFAOYSA-N	Lipids and lipid-like molecules	Prenol lipids	Triterpenoids
Rubianol-a	CC(C)C1CC(C2C1(CCC3(C2(CC=C4C3C(CC5C4(CC(C(=O)C5(C)C)O)C)O)C)C)CO)O	ZAGSMKWHSPITNU-UHFFFAOYSA-N	Lipids and lipid-like molecules	Prenol lipids	Triterpenoids
celastolide	CC1C(=O)OC2C13CCC4C(C3CCO2)(CCC5(C4(CCC6(C5CC(CC6)(C)C(=O)O)C)C)C)C	MHUNAMWYXWYEMX-UHFFFAOYSA-N	Organoheterocyclic compounds	Naphthopyrans	Unassigned
Pedunculoside	CC1CCC2(CCC3(C(=CCC4C3(CCC5C4(CCC(C5(C)CO)O)C)C)C2C1(C)O)C)C(=O)OC6C(C(C(C(O6)CO)O)O)O	LARPFJIXBULVPK-UHFFFAOYSA-N	Lipids and lipid-like molecules	Prenol lipids	Terpene glycosides
Rosamultin	CC1CCC2(CCC3(C(=CCC4C3(CCC5C4(CC(C(C5(C)C)O)O)C)C)C2C1(C)O)C)C(=O)OC6C(C(C(C(O6)CO)O)O)O	MLKQAGPAYHTNQQ-UHFFFAOYSA-N	Lipids and lipid-like molecules	Prenol lipids	Terpene glycosides
